# Supplementary material for: Phosphoric acid-catalyzed asymmetric N-propargylation of pyridazinones and 2-pyridones
Source: Royal Society of Chemistry journal article supplement (doi:10.1039/d3qo00995e), 2023-01-01
Supplement: d3qo00995e1.pdf [file d3qo00995e1.pdf]

## Supporting Information

# Phosphoric Acid-Catalyzed Asymmetric N-propargylation of Pyridazinones and 2-Pyridones

Qiongya Li, Tian Chen and Jiangtao Sun\*

Jiangsu Key Laboratory of Advanced Catalytic Materials & Technology, School of Petrochemical Engineering, Changzhou University, 1 Gehu Road, 213164 Changzhou, China

E-mail: [jtsun@cczu.edu.cn](mailto:jtsun@cczu.edu.cn)

## Table of Contents

1. General information
2. Preparation of substrates
3. Optimization of the reaction conditions for **5**
4. General procedure for Scheme 2
5. General procedure for Scheme 3
6. Control experiments for Scheme 4
7. X-ray crystallographic data of **5f**
8. References
9. NMR and HPLC Spectra of compounds

## General information

All of the reactions were carried out in flame-dried tubes under an argon atmosphere. Solvents were dried prior to use. Commercially obtained reagents were used as received. Analytical thin layer chromatography (TLC) was carried out using pre-coated (0.20 mm thickness) silica gel plates with F<sub>254</sub> indicator. For column chromatography, 200-300 mesh silica gel was used. <sup>1</sup>H NMR spectra were recorded on Bruker 300 MHz, or 400 MHz spectrometer in CDCl<sub>3</sub> or DMSO-d<sub>6</sub>. <sup>13</sup>C NMR spectra were recorded on Bruker 75 MHz, or 100 MHz spectrometer in CDCl<sub>3</sub> or DMSO-d<sub>6</sub>. <sup>19</sup>F NMR spectra were recorded on Bruker 376 MHz spectrometer in CDCl<sub>3</sub> or DMSO-d<sub>6</sub>. Data for <sup>1</sup>H NMR spectra were reported relative to tetramethylsilane (TMS) as an internal standard (0 ppm) and were reported as follows: chemical shift ( $\delta$  ppm), multiplicity, coupling constant (Hz) and integration. Multiplicities are denoted as follows: s = singlet, d = doublet, t = triplet, q = quartet, dd = doublet of doublets, td = triplet of doublets, and m = multiplet. Data for <sup>13</sup>C NMR spectra were reported relative to CDCl<sub>3</sub> as an internal standard (77.16 ppm) and were reported in terms of chemical shift ( $\delta$  ppm). High resolution mass spectra (HRMS) were performed on Agilent 6540 Q-TOF or Agilent 6230A TOF mass spectrometer (ESI). Melting points were uncorrected and determined on a SGW X-4B melting point apparatus. Enantiomeric excess (ee) values were determined by chiral HPLC analysis on Daicel Chiralpak IA, IC, OD-H, AS-H, ID column. Optical rotations were determined on a Shanghai Shenguang® polarimeter and reported as follows:  $[\alpha]_D^T$  (c: g/100 mL, solvent).

All of the CPA were known compounds and were purchased from Daicel Chiral Technologies (China) Co., Ltd. All of the Pyridazinones **1** and Pyridones **4** were known compounds and were purchased from Aladdin, Bide pharm and Energy Chemical. All of the C-alkynyl N,O-acetals **2** were known and prepared according to the literature procedures.<sup>1</sup>

## Optimization of the reaction conditions for 5<sup>a</sup>

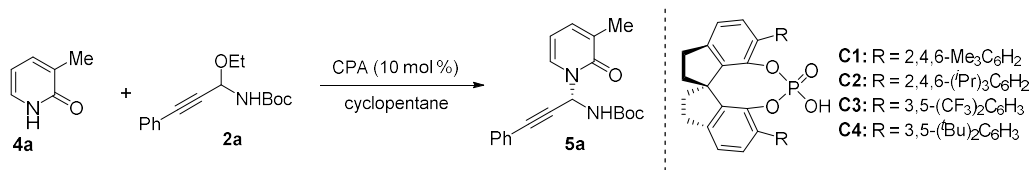

| entry             | CPA | solvent           | 1a:2a | t (°C) | yield (%) <sup>b</sup> | ee (%) <sup>c</sup> |
|-------------------|-----|-------------------|-------|--------|------------------------|---------------------|
| 1                 | C1  | cyclopentane      | 1:4   | 30     | 23                     | 0                   |
| 2                 | C2  | cyclopentane      | 1:4   | 30     | 83                     | 83                  |
| 3                 | C3  | cyclopentane      | 1:4   | 30     | <5                     | 0                   |
| 4                 | C4  | cyclopentane      | 1:4   | 30     | 23                     | 26                  |
| 5                 | C2  | DCM               | 1:4   | 30     | 56                     | 76                  |
| 6                 | C2  | DCE               | 1:4   | 30     | 43                     | 70                  |
| 7                 | C2  | Et <sub>2</sub> O | 1:4   | 30     | 32                     | 72                  |
| 8                 | C2  | MeCN              | 1:4   | 30     | 27                     | 60                  |
| 9                 | C2  | Hexane            | 1:4   | 30     | 16                     | 86                  |
| 10                | C2  | PhMe              | 1:4   | 30     | 68                     | 78                  |
| 11                | C2  | THF               | 1:4   | 30     | 61                     | 78                  |
| 12                | C2  | cyclohexane       | 1:4   | 30     | 72                     | 82                  |
| 13                | C2  | cyclopentane      | 1:4   | 25     | 79                     | 88                  |
| 14                | C2  | cyclopentane      | 1:4   | 20     | 58                     | 90                  |
| 15                | C2  | cyclopentane      | 1:4   | 10     | <10                    | 94                  |
| 16                | C2  | cyclopentane      | 1:4   | 0      | <5                     | 94                  |
| 17 <sup>d</sup>   | C2  | Cyclopentane      | 1:4   | 25     | 79                     | 88                  |
| 18 <sup>e</sup>   | C2  | cyclopentane      | 1:4   | 25     | 78                     | 93                  |
| 19 <sup>f</sup>   | C2  | cyclopentane      | 1:4   | 25     | 78                     | 88                  |
| 20 <sup>e,g</sup> | C2  | cyclopentane      | 1:4   | 25     | 35                     | 93                  |

<sup>a</sup>Reaction conditions: **1a** (0.1 mmol), **2a** (0.4 mmol), catalyst (10 mol %) in solvent (2 mL) under Ar. The reaction was stirred at 25 °C for 24 h. <sup>b</sup>Isolated yield. <sup>c</sup>ee was determined by chiral HPLC analysis. <sup>d</sup>3ÅMS (50 mg) was added. <sup>e</sup>4ÅMS (50 mg) was added. <sup>f</sup>5ÅMS (50 mg) was added. <sup>g</sup>5 mol % of **C2** was used.

## General procedure for Scheme 2

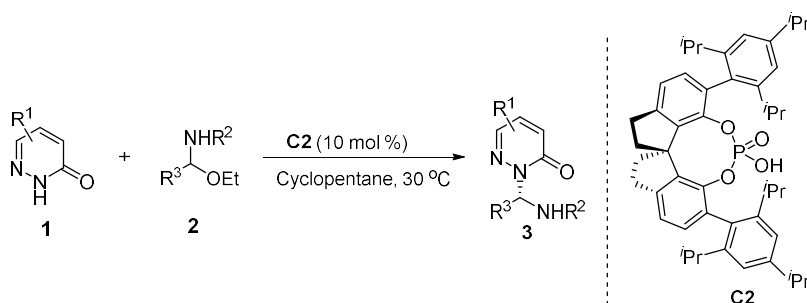

To a 10 mL of dry Schlenk tube were added **C2** (7.2 mg, 0.01 mmol, 10 mol %), **1** (0.1 mmol, 1.0 equiv) and **2** (0.4 mmol, 4.0 equiv), then Cyclopentane (2 mL) was added under argon atmosphere. The resulting mixture was stirred at 30 °C for 24 hours. The reaction mixture was concentrated

under vacuum; the crude residue was purified by silica gel column chromatography (eluent: petroleum ether/EtOAc = 10:1-3:1) to give **3**.

[Note: racemic samples were prepared by using BNDHP instead of **C2**.]

***tert*-Butyl (*S*)-(1-(3-chloro-6-oxopyridazin-1(6*H*)-yl)-3-phenylprop-2-yn-1-yl)carbamate (**3a**)**

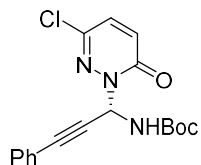

Prepared from 6-chloropyridazin-3(2*H*)-one (13.0 mg, 0.1 mmol, 1.0 equiv) and *tert*-butyl (1-ethoxy-3-phenylprop-2-yn-1-yl)carbamate (110.0 mg, 0.4 mmol, 4.0 equiv) according to the general procedure in the presence of **C2** (7.2 mg, 0.01 mmol, 10 mol %), purified by silica gel column chromatography (petroleum ether/ EtOAc = 10:1 to 3:1) and was obtained as a white solid (31.6 mg, 88%), mp: 159-161 °C.

**R<sub>f</sub>** (Petroleum ether/ EtOAc = 3:1) = 0.3.

**HPLC** (IC, *n*-hexane/*i*-PrOH = 50/50, flow rate = 1.0 mL/min, I = 215 nm) *t<sub>R</sub>* = 8.84 min (major), 10.79 min (minor), 94% ee.

**[α]<sub>D</sub><sup>25</sup>**: +29.76 (c = 0.25, CH<sub>2</sub>Cl<sub>2</sub>).

**<sup>1</sup>H NMR** (400 MHz, CDCl<sub>3</sub>) δ 7.46-7.39 (m, 2H), 7.37-7.22 (m, 4H), 7.16 (d, *J* = 9.6 Hz, 1H), 6.93 (d, *J* = 9.6 Hz, 1H), 6.23 (s, 1H), 1.45 (s, 9H).

**<sup>13</sup>C NMR** (100 MHz, CDCl<sub>3</sub>) δ 157.6, 153.5, 138.1, 134.2, 132.8, 132.1, 129.2, 128.4, 121.4, 85.1, 82.8, 81.3, 59.0, 28.3.

**HRMS (ESI)** *m/z*: [M+H]<sup>+</sup> Calcd for C<sub>18</sub>H<sub>19</sub>ClN<sub>3</sub>O<sub>3</sub> 360.1109; Found 360.1112.

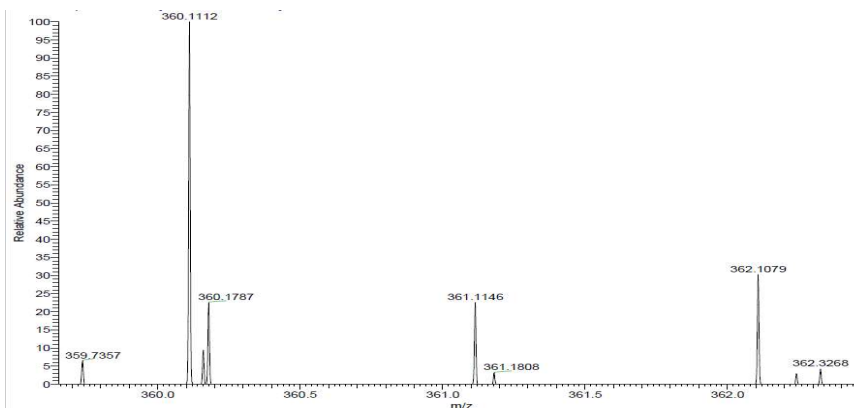

***tert*-Butyl (*S*)-(1-(3-chloro-6-oxopyridazin-1(6*H*)-yl)-3-(*p*-tolyl)prop-2-yn-1-yl)carbamate (**3b**)**

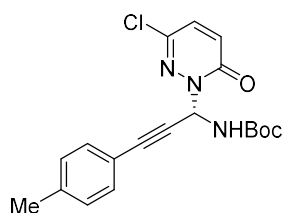

Prepared from 6-chloropyridazin-3(2*H*)-one (13.0 mg, 0.1 mmol, 1.0 equiv) and *tert*-butyl (1-ethoxy-3-(*p*-tolyl)prop-2-yn-1-yl)carbamate (115.7 mg, 0.4 mmol, 4.0 equiv) according to the general procedure in the presence of **C2** (7.2 mg, 0.01 mmol, 10 mol %), purified by silica gel

column chromatography (petroleum ether/ EtOAc = 10:1 to 3:1) and was obtained as a white solid (34.7 mg, 93%), mp: 177-179 °C.

$R_f$  (Petroleum ether/ EtOAc = 3:1) = 0.3.

**HPLC** (IC, *n*-hexane/*i*-PrOH = 60/40, flow rate = 1.0 mL/min, I = 215 nm)  $t_R$  = 11.07 min (major), 14.23 min (minor), 96% ee.

$[\alpha]_D^{25}$ : +8.96 (c = 0.25, CH<sub>2</sub>Cl<sub>2</sub>).

**<sup>1</sup>H NMR** (400 MHz, CDCl<sub>3</sub>) δ 7.35-7.30 (m, 2H), 7.25 (d, *J* = 9.6 Hz, 1H), 7.16 (d, *J* = 9.6 Hz, 1H), 7.10 (d, *J* = 7.6 Hz, 2H), 6.92 (d, *J* = 9.6 Hz, 1H), 6.19 (s, 1H), 2.33 (s, 3H), 1.45 (s, 9H).

**<sup>13</sup>C NMR** (100 MHz, CDCl<sub>3</sub>) δ 157.6, 153.5, 139.5, 138.0, 134.2, 132.8, 132.0, 129.2, 118.3, 85.3, 82.1, 81.3, 59.1, 28.3, 21.6.

**HRMS (ESI)** *m/z*: [M+Na]<sup>+</sup> Calcd for C<sub>19</sub>H<sub>20</sub>ClN<sub>3</sub>NaO<sub>3</sub> 396.1085; Found 396.1085.

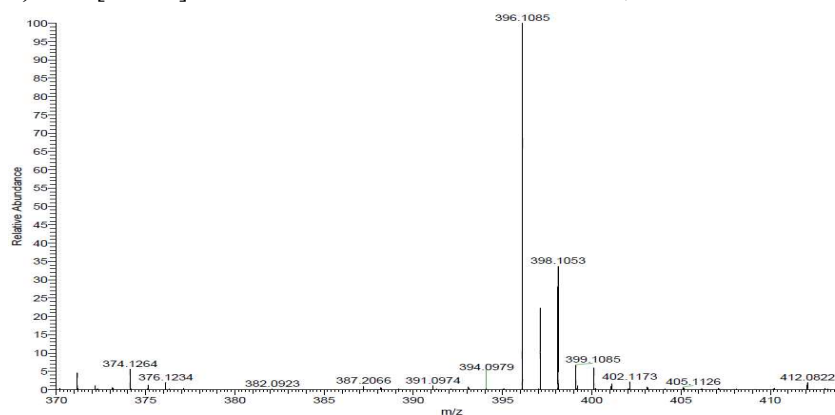

***tert*-Butyl (S)-(1-(3-chloro-6-oxopyridazin-1(6H)-yl)-3-(4-methoxyphenyl)prop-2-yn-1-yl)carbamate (3c)**

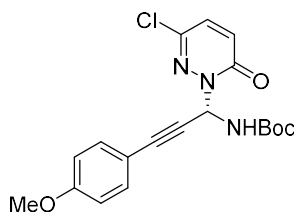

Prepared from 6-chloropyridazin-3(2H)-one (13.0 mg, 0.1 mmol, 1.0 equiv) and *tert*-butyl (1-ethoxy-3-(4-methoxyphenyl)prop-2-yn-1-yl)carbamate (122.1 mg, 0.4 mmol, 4.0 equiv) according to the general procedure in the presence of **C2** (7.2 mg, 0.01 mmol, 10 mol %), purified by silica gel column chromatography (petroleum ether/ EtOAc = 10:1 to 2:1) and was obtained as a white solid (34.6 mg, 89%), mp: 135-137 °C.

$R_f$  (Petroleum ether/ EtOAc = 3:1) = 0.1.

**HPLC** (IC, *n*-hexane/*i*-PrOH = 50/50, flow rate = 2.0 mL/min, I = 215 nm)  $t_R$  = 9.08 min (major), 13.13 min (minor), 90% ee.

$[\alpha]_D^{25}$ : +35.68 (c = 0.25, CH<sub>2</sub>Cl<sub>2</sub>).

**<sup>1</sup>H NMR** (400 MHz, CDCl<sub>3</sub>) δ 7.40-7.32 (m, 2H), 7.25 (d, *J* = 9.6 Hz, 1H), 7.16 (d, *J* = 9.6 Hz, 1H), 6.92 (d, *J* = 9.6 Hz, 1H), 6.85-6.78 (m, 2H), 6.25 (s, 1H), 3.79 (s, 3H), 1.45 (s, 9H).

**<sup>13</sup>C NMR** (100 MHz, CDCl<sub>3</sub>) δ 160.3, 157.6, 153.6, 138.0, 134.2, 133.6, 132.8, 114.0, 113.4, 85.2, 81.5, 81.2, 59.1, 55.4, 28.3.

**HRMS (ESI)** *m/z*: [M+Na]<sup>+</sup> Calcd for C<sub>19</sub>H<sub>20</sub>ClN<sub>3</sub>NaO<sub>4</sub> 412.1035; Found 412.1032.

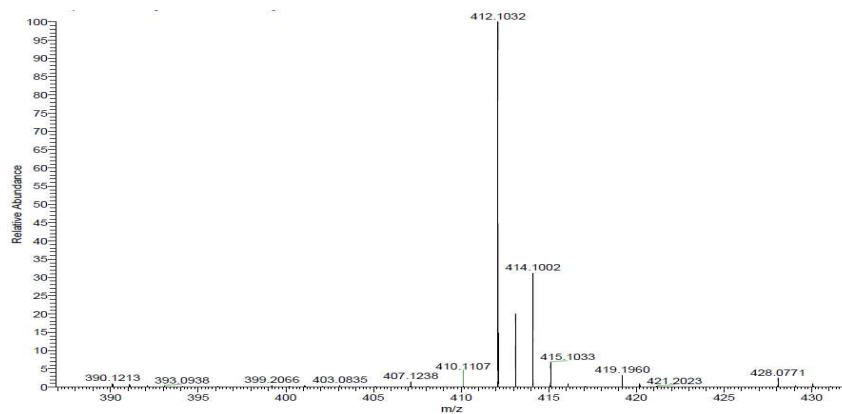

***tert*-Butyl (S)-(1-(3-chloro-6-oxopyridazin-1(6H)-yl)-3-(4-fluorophenyl)prop-2-yn-1-yl)carbamate (3d)**

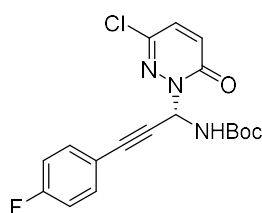

Prepared from 6-chloropyridazin-3(2H)-one (13.0 mg, 0.1 mmol, 1.0 equiv) and *tert*-butyl (1-ethoxy-3-(4-fluorophenyl)prop-2-yn-1-yl)carbamate (117.2 mg, 0.4 mmol, 4.0 equiv) according to the general procedure in the presence of **C2** (7.2 mg, 0.01 mmol, 10 mol %), purified by silica gel column chromatography (petroleum ether/ EtOAc = 10:1 to 3:1) and was obtained as a white solid (27.5 mg, 73%), mp: 139-141 °C.

$R_f$  (Petroleum ether/ EtOAc = 3:1) = 0.3.

**HPLC** (IC, *n*-hexane/*i*-PrOH = 70/30, flow rate = 1.0 mL/min, I = 215 nm)  $t_R$  = 12.70 min (major), 14.04 min (minor), 92% ee.

$[\alpha]_D^{25}$ : +24.32 (c = 0.25, CH<sub>2</sub>Cl<sub>2</sub>).

**<sup>1</sup>H NMR** (400 MHz, CDCl<sub>3</sub>) δ 7.47-7.38 (m, 2H), 7.24 (d, *J* = 9.6 Hz, 1H), 7.19 (d, *J* = 9.6 Hz, 1H), 7.04-6.97 (m, 2H), 6.94 (d, *J* = 9.6 Hz, 1H), 6.20 (s, 1H), 1.45 (s, 9H).

**<sup>13</sup>C NMR** (100 MHz, CDCl<sub>3</sub>) δ 163.0 (d, *J* = 250.0 Hz), 157.6, 153.5, 138.1, 134.3, 134.1 (d, *J* = 9.0 Hz), 132.8, 117.5 (d, *J* = 3.0 Hz), 115.8 (d, *J* = 22.0 Hz), 84.1, 82.5, 81.4, 59.1, 28.3.

**<sup>19</sup>F NMR** (376 MHz, CDCl<sub>3</sub>) δ -109.2 (s).

**HRMS (ESI)** *m/z*: [M+Na]<sup>+</sup> Calcd for C<sub>18</sub>H<sub>17</sub>ClFN<sub>3</sub>NaO<sub>3</sub> 400.0835; Found 400.0833.

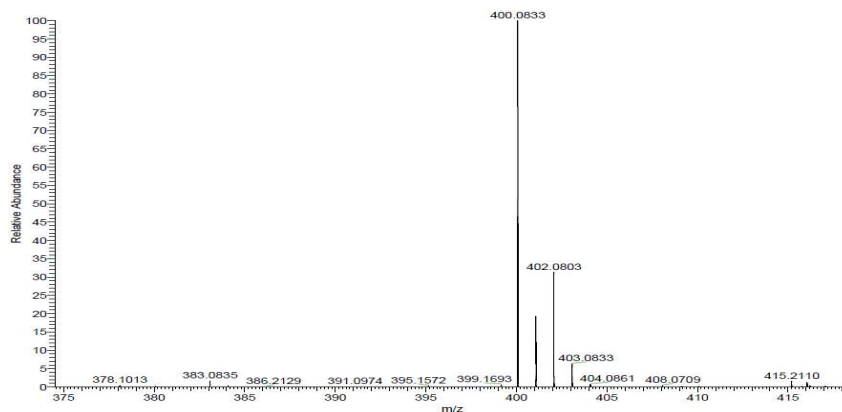

***tert*-Butyl (S)-(1-(3-chloro-6-oxopyridazin-1(6H)-yl)-3-(3-chlorophenyl)prop-2-yn-1-yl)carbamate (3e)**

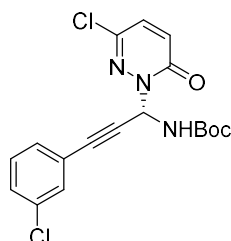

Prepared from 6-chloropyridazin-3(2H)-one (13.0 mg, 0.1 mmol, 1.0 equiv) and *tert*-butyl (3-(3-chlorophenyl)-1-ethoxyprop-2-yn-1-yl)carbamate (123.6 mg, 0.4 mmol, 4.0 equiv) according to the general procedure in the presence of **C2** (7.2 mg, 0.01 mmol, 10 mol %), purified by silica gel column chromatography (petroleum ether/ EtOAc = 10:1 to 3:1) and was obtained as a white solid (18.5 mg, 47%), mp: 139-141 °C.

$R_f$  (Petroleum ether/ EtOAc = 3:1) = 0.4.

**HPLC** (IA, *n*-hexane/*i*-PrOH = 90/10, flow rate = 1.0 mL/min, I = 215 nm)  $t_R$  = 13.56 min (minor), 15.50 min (major), 92% ee.

$[\alpha]_D^{25}$ : +17.60 ( $c$  = 0.10, CH<sub>2</sub>Cl<sub>2</sub>).

**<sup>1</sup>H NMR** (400 MHz, CDCl<sub>3</sub>)  $\delta$  7.43 (t,  $J$  = 1.6 Hz, 1H), 7.34-7.30 (m, 2H), 7.26-7.21 (m, 2H), 7.19 (d,  $J$  = 9.6 Hz, 1H), 6.94 (d,  $J$  = 9.6 Hz, 1H), 6.14 (s, 1H), 1.45 (s, 9H).

**<sup>13</sup>C NMR** (100 MHz, CDCl<sub>3</sub>)  $\delta$  157.6, 153.4, 138.1, 134.3, 134.2, 132.8, 131.9, 130.2, 129.6, 129.5, 123.0, 83.8, 83.6, 81.4, 59.0, 28.2.

**HRMS (ESI)**  $m/z$ : [M+Na]<sup>+</sup> Calcd for C<sub>18</sub>H<sub>17</sub>Cl<sub>2</sub>N<sub>3</sub>NaO<sub>3</sub> 416.0539; Found 416.0538.

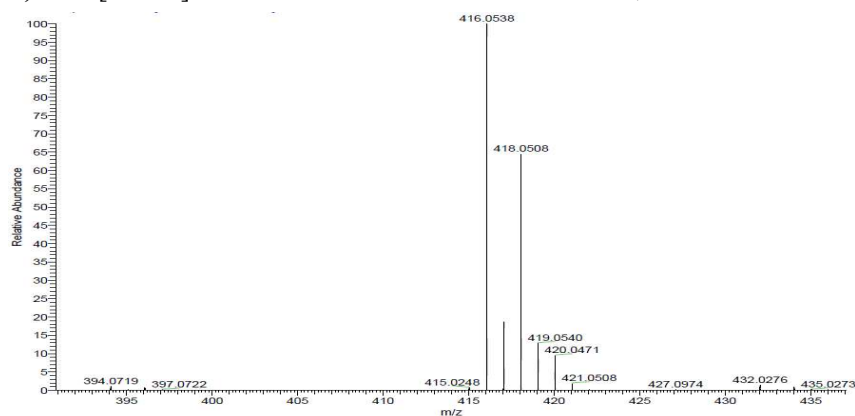

***tert*-Butyl (S)-(1-(3-chloro-6-oxopyridazin-1(6H)-yl)-3-cyclopropylprop-2-yn-1-yl)carbamate (3f)**

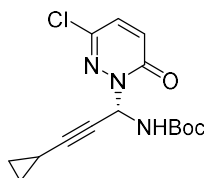

Prepared from 6-chloropyridazin-3(2H)-one (13.0 mg, 0.1 mmol, 1.0 equiv) and *tert*-butyl (3-cyclopropyl-1-ethoxyprop-2-yn-1-yl)carbamate (95.7 mg, 0.4 mmol, 4.0 equiv) according to the general procedure in the presence of **C2** (7.2 mg, 0.01 mmol, 10 mol %), purified by silica gel column chromatography (petroleum ether/ EtOAc = 10:1 to 3:1) and was obtained as a white solid



(29.7 mg, 92%), mp: 149-151 °C.

$R_f$  (Petroleum ether/ EtOAc = 3:1) = 0.2.

**HPLC** (IC, *n*-hexane/*i*-PrOH = 50/50, flow rate = 2.0 mL/min, I = 215 nm)  $t_R$  = 6.57 min (major), 9.72 min (minor), 80% ee.

$[\alpha]_D^{25}$ : +18.88 (c = 0.25, CH<sub>2</sub>Cl<sub>2</sub>).

**<sup>1</sup>H NMR** (400 MHz, CDCl<sub>3</sub>) δ 7.17 (d, *J* = 9.6 Hz, 1H), 6.95 (dd, *J* = 9.2, 1.6 Hz, 1H), 6.91 (d, *J* = 9.6 Hz, 1H), 6.02 (s, 1H), 1.42 (s, 9H), 1.31-1.14 (m, 1H), 0.82-0.74 (m, 2H), 0.74-0.67 (m, 2H).

**<sup>13</sup>C NMR** (100 MHz, CDCl<sub>3</sub>) δ 157.6, 153.4, 137.8, 134.1, 132.8, 89.4, 81.1, 69.1, 58.8, 28.3, 8.4, 8.3, -0.6.

**HRMS (ESI)** m/z: [M+Na]<sup>+</sup> Calcd for C<sub>15</sub>H<sub>18</sub>ClN<sub>3</sub>NaO<sub>3</sub> 346.0929; Found 346.0927.

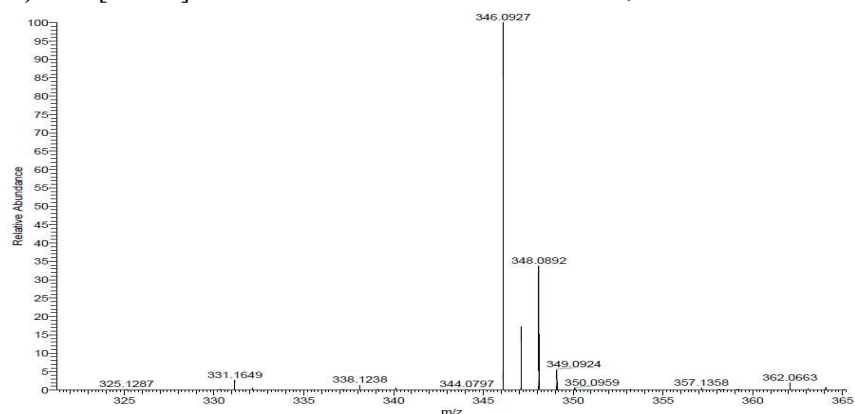

**tert-Butyl (S)-(1-(3-chloro-6-oxopyridazin-1(6H)-yl)-3-(trimethylsilyl)prop-2-yn-1-yl)carbamate (3g)**

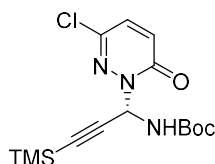

Prepared from 6-chloropyridazin-3(2H)-one (13.0 mg, 0.1 mmol, 1.0 equiv) and *tert*-butyl (1-ethoxy-3-(trimethylsilyl)prop-2-yn-1-yl)carbamate (108.5 mg, 0.4 mmol, 4.0 equiv) according to the general procedure in the presence of **C2** (7.2 mg, 0.01 mmol, 10 mol %), purified by silica gel column chromatography (petroleum ether/ EtOAc = 10:1 to 3:1) and was obtained as a white solid (20.6 mg, 58%), mp: 169-171 °C.

$R_f$  (Petroleum ether/ EtOAc = 3:1) = 0.3.

**HPLC** (IC, *n*-hexane/*i*-PrOH = 70/30, flow rate = 1.0 mL/min, I = 215 nm)  $t_R$  = 6.86 min (major), 8.21 min (minor), 90% ee.

$[\alpha]_D^{25}$ : +4.00 (c = 0.15, CH<sub>2</sub>Cl<sub>2</sub>).

**<sup>1</sup>H NMR** (400 MHz, CDCl<sub>3</sub>) δ 7.18 (d, *J* = 9.6 Hz, 1H), 7.01 (d, *J* = 10.0 Hz, 1H), 6.92 (d, *J* = 9.6 Hz, 1H), 6.04 (s, 1H), 1.43 (s, 9H), 0.16 (s, 9H).

**<sup>13</sup>C NMR** (100 MHz, CDCl<sub>3</sub>) δ 157.5, 153.5, 137.9, 134.2, 132.8, 97.9, 90.8, 81.3, 58.7, 28.3, -0.3.

**HRMS (ESI)** m/z: [M+Na]<sup>+</sup> Calcd for C<sub>15</sub>H<sub>22</sub>ClN<sub>3</sub>NaO<sub>3</sub>Si 378.1011; Found 378.1012.

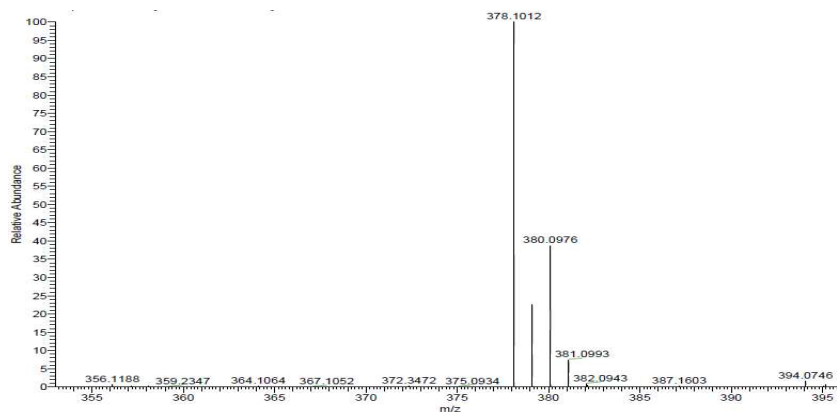

***tert*-Butyl (*S*)-((3-chloro-6-oxopyridazin-1(6H)-yl)(phenyl)methyl)carbamate (**3h**)**

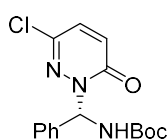

Prepared from 6-chloropyridazin-3(2H)-one (13.0 mg, 0.1 mmol, 1.0 equiv) and *tert*-butyl (ethoxy(phenyl)methyl)carbamate (100.5 mg, 0.4 mmol, 4.0 equiv) according to the general procedure in the presence of **C2** (7.2 mg, 0.01 mmol, 10 mol %), purified by silica gel column chromatography (petroleum ether/ EtOAc = 10:1 to 3:1) and was obtained as a white solid (10.1 mg, 30%), mp: 154-156 °C.

$R_f$  (Petroleum ether/ EtOAc = 3:1) = 0.3.

HPLC (OD-H, *n*-hexane/*i*-PrOH = 80/20, flow rate = 2.0 mL/min, I = 215 nm)  $t_R$  = 8.89 min (major), 10.11 min (minor), 24% ee.

$[\alpha]_D^{25}$ : +9.80 (*c* = 0.1, CH<sub>2</sub>Cl<sub>2</sub>).

<sup>1</sup>H NMR (400 MHz, CDCl<sub>3</sub>) δ 7.43 (d, *J* = 10.0 Hz, 1H), 7.40-7.29 (m, 5H), 7.16 (d, *J* = 9.6 Hz, 1H), 6.89 (d, *J* = 9.6 Hz, 1H), 6.16 (s, 1H), 1.46 (s, 9H).

<sup>13</sup>C NMR (100 MHz, CDCl<sub>3</sub>) δ 158.3, 154.3, 137.9, 136.6, 133.8, 132.6, 128.8, 126.3, 80.9, 68.3, 28.3.

HRMS (ESI) *m/z*: [M+Na]<sup>+</sup> Calcd for C<sub>16</sub>H<sub>18</sub>ClN<sub>3</sub>NaO<sub>3</sub> 358.0929; Found 358.0927.

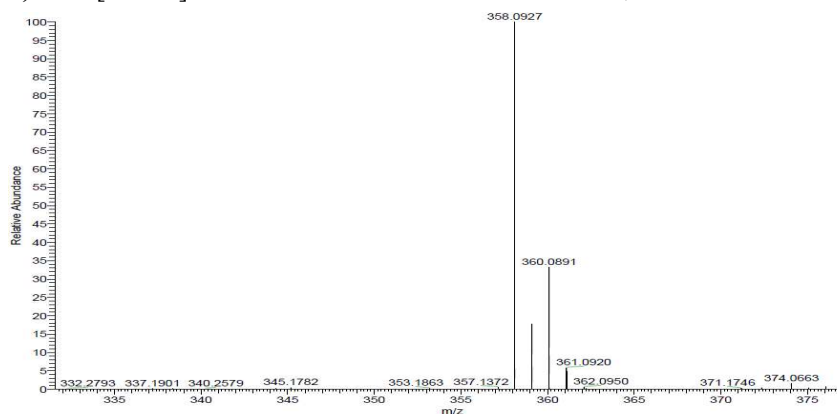

***tert*-Butyl (*S*)-((1-(3-chloro-6-oxopyridazin-1(6H)-yl)propyl)carbamate (**3i**)**

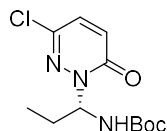

Prepared from 6-chloropyridazin-3(2H)-one (13.0 mg, 0.1 mmol, 1.0 equiv) and *tert*-butyl (1-ethoxypropyl)carbamate (81.3 mg, 0.4 mmol, 4.0 equiv) according to the general procedure in the presence of **C2** (7.2 mg, 0.01 mmol, 10 mol %), purified by silica gel column chromatography (petroleum ether/ EtOAc = 10:1 to 3:1) and was obtained as a white solid (13.2 mg, 46%), mp: 135-137 °C.

$R_f$  (Petroleum ether/EtOAc = 3:1) = 0.3.

HPLC (OD-H, *n*-hexane/*i*-PrOH = 80/20, flow rate = 1.0 mL/min, I = 215 nm)  $t_R$  = 6.49 min (major), 7.76 min (minor), 70% ee.

$[\alpha]_D^{25}$ : +12.00 (c = 0.1, CH<sub>2</sub>Cl<sub>2</sub>).

<sup>1</sup>H NMR (400 MHz, CDCl<sub>3</sub>) δ 7.16 (d, *J* = 9.6 Hz, 1H), 6.90 (d, *J* = 9.6 Hz, 1H), 6.35-6.18 (m, 1H), 5.65 (s, 1H), 2.02-1.79 (m, 2H), 1.42 (s, 9H), 0.95 (t, *J* = 7.6 Hz, 3H).

<sup>13</sup>C NMR (100 MHz, CDCl<sub>3</sub>) δ 158.5, 154.4, 137.6, 133.5, 132.6, 80.5, 68.0, 28.3, 27.2, 9.7.

HRMS (ESI) *m/z*: [M+Na]<sup>+</sup> Calcd for C<sub>12</sub>H<sub>18</sub>ClN<sub>3</sub>NaO<sub>3</sub> 310.0929; Found 310.0928.

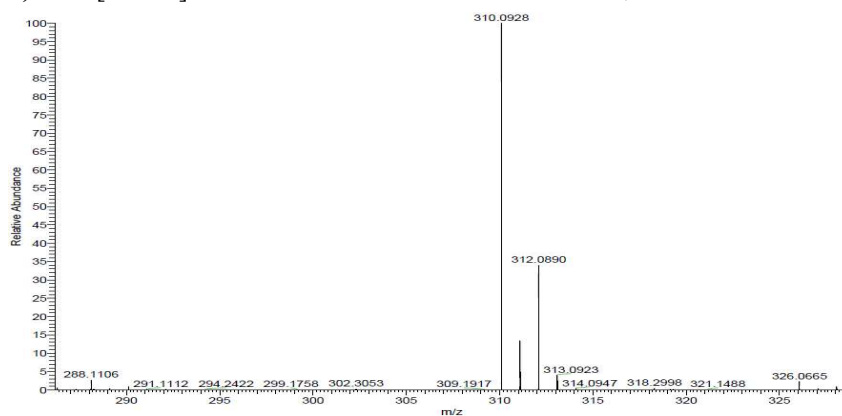

### Benzyl (*S*)-(1-(3-chloro-6-oxopyridazin-1(6H)-yl)-3-phenylprop-2-yn-1-yl)carbamate (**3j**)

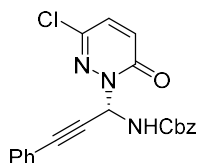

Prepared from 6-chloropyridazin-3(2H)-one (13.0 mg, 0.1 mmol, 1.0 equiv) and benzyl (1-ethoxy-3-phenylprop-2-yn-1-yl)carbamate (123.6 mg, 0.4 mmol, 4.0 equiv) according to the general procedure in the presence of **C2** (7.2 mg, 0.01 mmol, 10 mol %), purified by silica gel column chromatography (petroleum ether/ EtOAc c = 10:1 to 3:1) and was obtained as a white solid (16.1 mg, 41%), mp: 136-138 °C.

$R_f$  (Petroleum ether/ EtOAc = 5:1) = 0.3.

HPLC (IA, *n*-hexane/*i*-PrOH = 80/20, flow rate = 2.0 mL/min, I = 215 nm)  $t_R$  = 6.12 min (minor), 8.54 min (major), 92% ee.

$[\alpha]_D^{25}$ : +13.12 (c = 0.25, CH<sub>2</sub>Cl<sub>2</sub>).

<sup>1</sup>H NMR (400 MHz, CDCl<sub>3</sub>) δ 7.45-7.38 (m, 2H), 7.37-7.22 (m, 9H), 7.11 (d, *J* = 9.6 Hz, 1H), 6.90 (d, *J* = 9.6 Hz, 1H), 6.57 (d, *J* = 7.2 Hz, 1H), 5.18 (d, *J* = 12.0 Hz, 1H), 5.08 (d, *J* = 12.0 Hz, 1H).

$^{13}\text{C}$  NMR (100 MHz,  $\text{CDCl}_3$ )  $\delta$  157.6, 154.5, 138.3, 135.8, 134.3, 132.8, 132.1, 129.4, 128.7, 128.5, 128.4, 121.3, 85.5, 82.3, 67.7, 59.4.

HRMS (ESI)  $m/z$ :  $[\text{M}+\text{Na}]^+$  Calcd for  $\text{C}_{21}\text{H}_{16}\text{ClN}_3\text{NaO}_3$  416.0772; Found 416.0769.

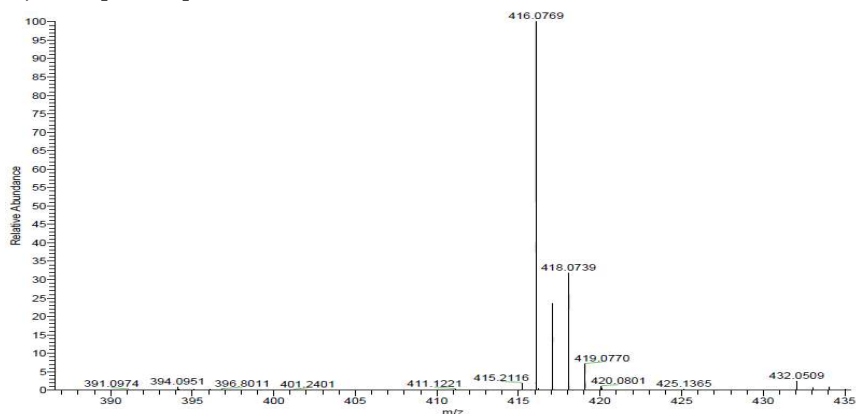

**(S)-N-(1-(3-chloro-6-oxopyridazin-1(6H)-yl)-3-phenylprop-2-yn-1-yl)benzamide (3k)**

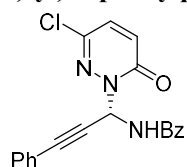

Prepared from 6-chloropyridazin-3(2H)-one (13.0 mg, 0.1 mmol, 1.0 equiv) and N-(1-ethoxy-3-phenylprop-2-yn-1-yl)benzamide (111.6 mg, 0.4 mmol, 4.0 equiv) according to the general procedure in the presence of **C2** (7.2 mg, 0.01 mmol, 10 mol %), purified by silica gel column chromatography (petroleum ether/ EtOAc = 10:1 to 3:1) and was obtained as a white solid (18.5 mg, 51%), mp: 196-198 °C.

$R_f$  (Petroleum ether/ EtOAc = 3:1) = 0.2.

HPLC (IC, *n*-hexane/*i*-PrOH = 40/60, flow rate = 3.0 mL/min, I = 215 nm)  $t_R$  = 14.07 min (major), 20.97 min (minor), 88% ee.

$[\alpha]_D^{25}$ : +8.53 ( $c$  = 0.15,  $\text{CH}_2\text{Cl}_2$ ).

$^1\text{H}$  NMR (400 MHz,  $\text{CDCl}_3$ )  $\delta$  7.98 (d,  $J$  = 8.8 Hz, 1H), 7.89 (d,  $J$  = 7.2 Hz, 2H), 7.70 (d,  $J$  = 8.8 Hz, 1H), 7.53 (t,  $J$  = 7.6 Hz, 1H), 7.48-7.39 (m, 4H), 7.37-7.24 (m, 3H), 7.14 (d,  $J$  = 10.0 Hz, 1H), 6.96 (d,  $J$  = 10.0 Hz, 1H).

$^{13}\text{C}$  NMR (100 MHz,  $\text{CDCl}_3$ )  $\delta$  165.9, 157.9, 138.2, 134.3, 132.9, 132.7, 132.5, 132.1, 129.3, 128.7, 128.4, 127.6, 121.2, 85.5, 82.5, 58.4.

HRMS (ESI)  $m/z$ :  $[\text{M}+\text{Na}]^+$  Calcd for  $\text{C}_{20}\text{H}_{14}\text{ClN}_3\text{NaO}_2$  386.0667; Found 386.0666.

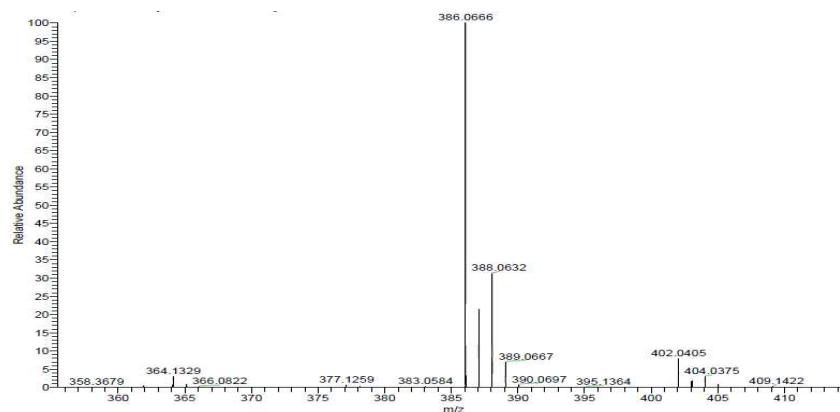

***tert*-Butyl (*S*)-(1-(3-bromo-6-oxopyridazin-1(6H)-yl)-3-phenylprop-2-yn-1-yl)carbamate (**3l**)**

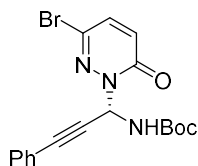

Prepared from 6-bromopyridazin-3(2H)-one (17.4 mg, 0.1 mmol, 1.0 equiv) and *tert*-butyl (1-ethoxy-3-phenylprop-2-yn-1-yl)carbamate (110.0 mg, 0.4 mmol, 4.0 equiv) according to the general procedure in the presence of **C2** (7.2 mg, 0.01 mmol, 10 mol %), purified by silica gel column chromatography (petroleum ether/ EtOAc = 10:1 to 3:1) and was obtained as a white solid (32.7mg, 81%), mp: 162-164 °C.

**R<sub>f</sub>** (Petroleum ether/ EtOAc = 3:1) = 0.3.

**HPLC** (IC, *n*-hexane/*i*-PrOH = 50/50, flow rate = 1.0 mL/min, I = 215 nm) *t<sub>R</sub>* = 9.48 min (major), 11.97 min (minor), 94% ee.

**[α]<sub>D</sub><sup>25</sup>**: +22.16 (c = 0.25, CH<sub>2</sub>Cl<sub>2</sub>).

**<sup>1</sup>H NMR** (400 MHz, CDCl<sub>3</sub>) δ 7.46-7.41 (m, 2H), 7.36-7.20 (m, 5H), 6.83 (d, *J* = 9.6 Hz, 1H), 6.25 (s, 1H), 1.45 (s, 9H).

**<sup>13</sup>C NMR** (100 MHz, CDCl<sub>3</sub>) δ 157.6, 153.5, 136.9, 132.5, 132.1, 129.2, 128.4, 127.0, 121.4, 85.1, 82.8, 81.3, 59.2, 28.3.

**HRMS (ESI)** *m/z*: [M+Na]<sup>+</sup> Calcd for C<sub>18</sub>H<sub>18</sub>BrN<sub>3</sub>NaO<sub>3</sub> 426.0424; Found 426.0423.

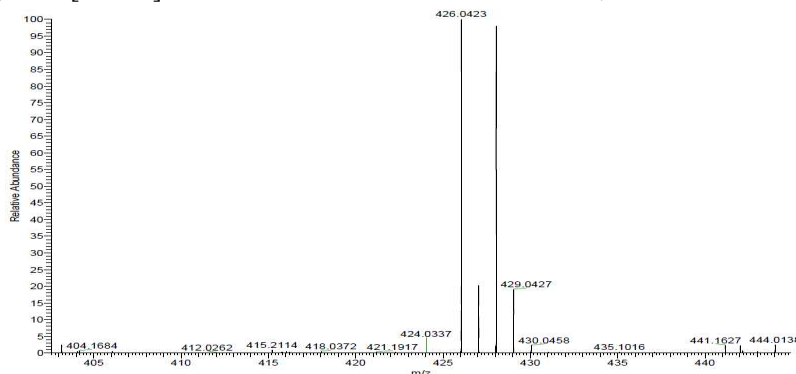

***tert*-Butyl (*S*)-(1-(3-methyl-6-oxopyridazin-1(6H)-yl)-3-phenylprop-2-yn-1-yl)carbamate (**3m**)**

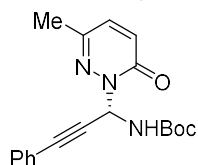

Prepared from *tert*-butyl 6-methylpyridazin-3(2H)-one (11.0 mg, 0.1 mmol, 1.0 equiv) and *tert*-butyl (1-ethoxy-3-phenylprop-2-yn-1-yl)carbamate (110.0 mg, 0.4 mmol, 4.0 equiv) according to the general procedure in the presence of **C2** (7.2 mg, 0.01 mmol, 10 mol %), purified by silica gel column chromatography (petroleum ether/ EtOAc = 10:1 to 2:1) and was obtained as a white solid (7.5 mg, 22%), mp: 163-165 °C.

**R<sub>f</sub>** (Petroleum ether/ EtOAc = 2:1) = 0.2.

**HPLC** (IA, *n*-hexane/*i*-PrOH = 70/30, flow rate = 1.0 mL/min, I = 215 nm) *t<sub>R</sub>* = 6.06 min (minor), 7.16 min (major), 92% ee.

**[α]<sub>D</sub><sup>25</sup>**: +81.52 (c = 0.25, CH<sub>2</sub>Cl<sub>2</sub>).

**<sup>1</sup>H NMR** (400 MHz, CDCl<sub>3</sub>) δ 7.48-7.38 (m, 2H), 7.36-7.26 (m, 3H), 7.25-7.12 (m, 1H), 7.08 (d, *J* = 9.6 Hz, 1H), 6.87 (d, *J* = 9.6 Hz, 1H), 6.33 (s, 1H), 2.36 (s, 3H), 1.45 (s, 9H).

$^{13}\text{C}$  NMR (100 MHz,  $\text{CDCl}_3$ )  $\delta$  158.5, 153.7, 144.7, 133.8, 132.0, 130.6, 128.9, 128.2, 121.7, 84.2, 83.6, 80.9, 59.9, 28.3, 20.9.

HRMS (ESI)  $m/z$ :  $[\text{M}+\text{Na}]^+$  Calcd for  $\text{C}_{19}\text{H}_{21}\text{N}_3\text{NaO}_3$  362.1475; Found 362.1472.

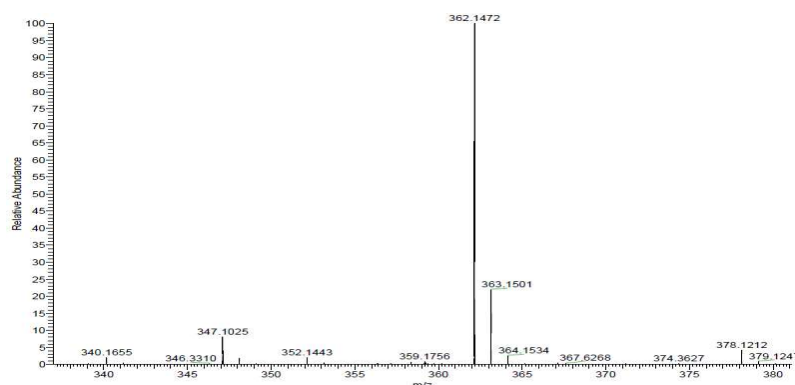

***tert*-Butyl (*S*)-(1-(3-(benzyloxy)-6-oxopyridazin-1(6H)-yl)-3-phenylprop-2-yn-1-yl)carbamate (3n)**

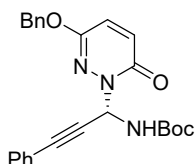

Prepared from 6-(benzyloxy)pyridazin-3(2H)-one (20.2 mg, 0.1 mmol, 1.0 equiv) and *tert*-butyl (1-ethoxy-3-phenylprop-2-yn-1-yl)carbamate (110.0 mg, 0.4 mmol, 4.0 equiv) according to the general procedure in the presence of **C2** (7.2 mg, 0.01 mmol, 10 mol %), purified by silica gel column chromatography (petroleum ether/ EtOAc = 10:1 to 2:1) and was obtained as colorless oil (28.9 mg, 67%).

$R_f$  (Petroleum ether/ EtOAc = 3:1) = 0.1.

HPLC (IC, *n*-hexane/*i*-PrOH = 70/30, flow rate = 1.0 mL/min, I = 215 nm)  $t_R$  = 21.16 min (major), 24.15 min (minor), 94% ee.

$[\alpha]_D^{25}$ : +23.92 ( $c$  = 0.25,  $\text{CH}_2\text{Cl}_2$ ).

$^1\text{H}$  NMR (400 MHz,  $\text{CDCl}_3$ )  $\delta$  7.49-7.40 (m, 4H),  $\delta$  7.40-7.27 (m, 6H), 7.22 (s, 1H), 6.96 (d,  $J$  = 10.0 Hz, 1H), 6.91 (d,  $J$  = 10.0 Hz, 1H), 6.19 (s, 1H), 5.27 (d,  $J$  = 12.0 Hz, 1H), 5.21 (d,  $J$  = 12.0 Hz, 1H), 1.46 (s, 9H).

$^{13}\text{C}$  NMR (100 MHz,  $\text{CDCl}_3$ )  $\delta$  157.9, 153.7, 152.4, 135.9, 133.6, 132.1, 129.0, 128.7, 128.5, 128.4, 127.5, 121.8, 84.4, 83.6, 81.0, 69.3, 58.9, 28.4.

HRMS (ESI)  $m/z$ :  $[\text{M}+\text{Na}]^+$  Calcd for  $\text{C}_{25}\text{H}_{25}\text{N}_3\text{NaO}_4$  454.1737; Found 454.1732.

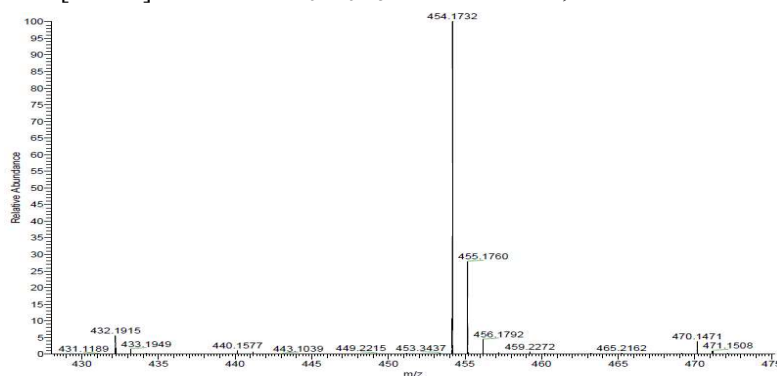

***tert*-Butyl (S)-(1-(6-oxopyridazin-1(6H)-yl)-3-phenylprop-2-yn-1-yl)carbamate (3o)**

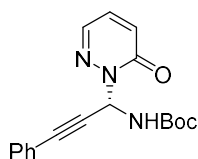

Prepared from pyridazin-3(2H)-one (9.6 mg, 0.1 mmol, 1.0 equiv) and *tert*-butyl (1-ethoxy-3-phenylprop-2-yn-1-yl)carbamate (110.0 mg, 0.4 mmol, 4.0 equiv) according to the general procedure in the presence of **C2** (7.2 mg, 0.01 mmol, 10 mol %), purified by silica gel column chromatography (petroleum ether/ EtOAc = 10:1 to 2:1) and was obtained as a white solid (13.3 mg, 41%), mp: 164-166 °C.

**R<sub>f</sub>** (Petroleum ether/ EtOAc = 2:1) = 0.2.

**HPLC** (IA, *n*-hexane/*i*-PrOH = 80/20, flow rate = 1.0 mL/min, I = 215 nm) *t<sub>R</sub>* = 17.64 min (minor), 20.11 min (major), 94% ee.

**[α]<sub>D</sub><sup>25</sup>**: +46.72 (c = 0.25, CH<sub>2</sub>Cl<sub>2</sub>).

**<sup>1</sup>H NMR** (400 MHz, CDCl<sub>3</sub>) δ 7.81 (dd, *J* = 3.6, 1.6 Hz, 1H), 7.48-7.38 (m, 2H), 7.36-7.25 (m, 4H), 7.19 (dd, *J* = 9.2, 3.6 Hz, 1H), 6.95 (dd, *J* = 9.2, 1.6 Hz, 1H), 6.30 (s, 1H), 1.44 (s, 9H).

**<sup>13</sup>C NMR** (100 MHz, CDCl<sub>3</sub>) δ 159.2, 153.7, 136.5, 132.1, 131.7, 130.9, 129.1, 128.3, 121.6, 84.7, 83.2, 81.1, 60.0, 28.3.

**HRMS (ESI)** *m/z*: [M+Na]<sup>+</sup> Calcd for C<sub>18</sub>H<sub>19</sub>N<sub>3</sub>NaO<sub>3</sub> 348.1319; Found 348.1314.

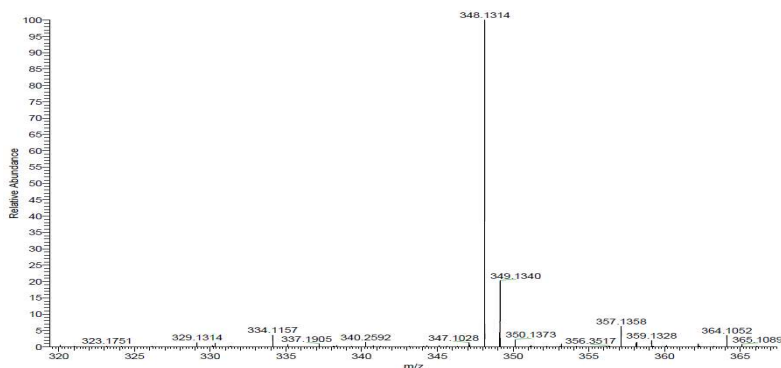

***tert*-Butyl (S)-(1-(3,4-dichloro-6-oxopyridazin-1(6H)-yl)-3-phenylprop-2-yn-1-yl)carbamate (3p)**

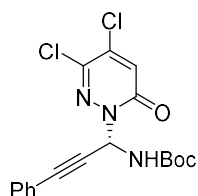

Prepared from 5,6-dichloropyridazin-3(2H)-one (16.4 mg, 0.1 mmol, 1.0 equiv) and *tert*-butyl (1-ethoxy-3-phenylprop-2-yn-1-yl)carbamate (110.0 mg, 0.4 mmol, 4.0 equiv) according to the general procedure in the presence of **C2** (7.2 mg, 0.01 mmol, 10 mol %), purified by silica gel column chromatography (petroleum ether/ EtOAc = 30:1 to 10:1) and was obtained as a white solid (36.2 mg, 92%), mp: 191-193 °C.

**R<sub>f</sub>** (Petroleum ether/ EtOAc = 10:1) = 0.3.

**HPLC** (OD-H, *n*-hexane/*i*-PrOH = 80/20, flow rate = 1.0 mL/min, I = 215 nm) *t<sub>R</sub>* = 6.73 min (minor), 8.85 min (major), 86% ee.

**[α]<sub>D</sub><sup>25</sup>**: +30.13 (c = 0.15, CH<sub>2</sub>Cl<sub>2</sub>).

<sup>1</sup>H NMR (400 MHz, CDCl<sub>3</sub>) δ 7.48-7.38 (m, 2H), 7.38-7.27 (m, 3H), 7.24 (d, *J* = 9.6 Hz, 1H), 7.11 (s, 1H), 6.15 (s, 1H), 1.46 (s, 9H).

<sup>13</sup>C NMR (100 MHz, CDCl<sub>3</sub>) δ 157.0, 153.4, 140.1, 137.0, 132.0, 130.1, 129.3, 128.4, 121.1, 85.4, 82.3, 81.5, 59.1, 28.2.

HRMS (ESI) *m/z*: [M+Na]<sup>+</sup> Calcd for C<sub>18</sub>H<sub>17</sub>Cl<sub>2</sub>N<sub>3</sub>NaO<sub>3</sub> 416.0539; Found 416.0537.

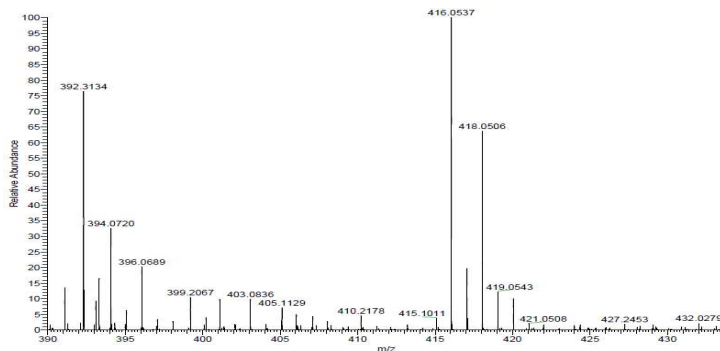

***tert*-Butyl (S)-(1-(4,5-dichloro-6-oxopyridazin-1(6H)-yl)-3-phenylprop-2-yn-1-yl)carbamate (3q)**

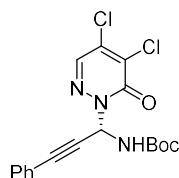

Prepared from 4,5-dichloropyridazin-3(2H)-one (16.4 mg, 0.1 mmol, 1.0 equiv) and *tert*-butyl (1-ethoxy-3-phenylprop-2-yn-1-yl)carbamate (110.0 mg, 0.4 mmol, 4.0 equiv) according to the general procedure in the presence of **C2** (7.2 mg, 0.01 mmol, 10 mol %), purified by silica gel column chromatography (petroleum ether/ EtOAc = 20:1 to 5:1) and was obtained as a colorless oil (19.7 mg, 50%).

R<sub>f</sub> (Petroleum ether/ EtOAc = 5:1) = 0.5.

HPLC (IC, *n*-hexane/*i*-PrOH = 50/50, flow rate = 1.0 mL/min, I = 215 nm) t<sub>R</sub> = 6.11 min (major), 7.62 min (minor), 88% ee.

[α]<sub>D</sub><sup>25</sup>: +59.60 (c = 0.25, CH<sub>2</sub>Cl<sub>2</sub>).

<sup>1</sup>H NMR (400 MHz, CDCl<sub>3</sub>) δ 7.83 (s, 1H), 7.47-7.38 (m, 2H), 7.38-7.27 (m, 3H), 7.25-7.17 (m, 1H), 6.24 (s, 1H), 1.45 (s, 9H).

<sup>13</sup>C NMR (100 MHz, CDCl<sub>3</sub>) δ 155.4, 153.6, 137.0, 136.1, 135.0, 132.1, 129.3, 128.4, 121.2, 85.5, 82.1, 81.5, 61.3, 28.3.

HRMS (ESI) *m/z*: [M+Na]<sup>+</sup> Calcd for C<sub>18</sub>H<sub>17</sub>Cl<sub>2</sub>N<sub>3</sub>NaO<sub>3</sub> 416.0539; Found 416.0537.

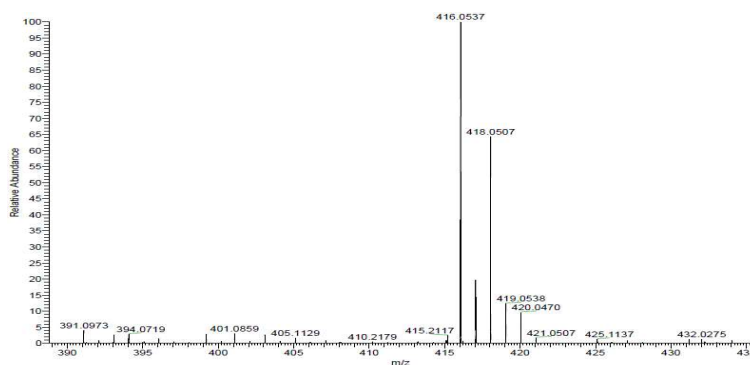



### General procedure for Scheme 3

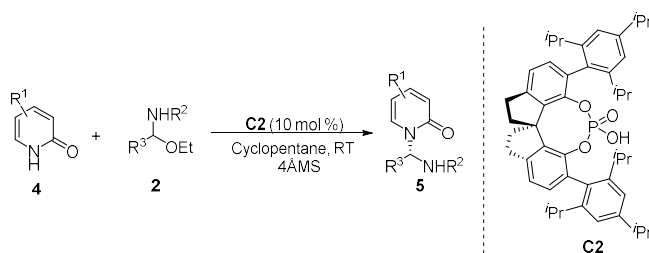

To a 10 mL of dry Schlenk tube were added **C2** (7.2 mg, 0.01 mmol, 10 mol %), 4ÅMS (50 mg), **4** (0.1 mmol, 1.0 equiv) and **2** (0.4 mmol, 4.0 equiv), then Cyclopentane (2 mL) was added under argon atmosphere. The resulting mixture was stirred at RT for 24 hours. The reaction mixture was concentrated under vacuum; the crude residue was purified by silica gel column chromatography (eluent: petroleum ether/EtOAc = 10:1-3:1) to give **5**.

[Note: racemic samples were prepared by using BNDHP instead of **C2**.]

#### *tert*-Butyl (*S*)-(1-(3-methyl-2-oxopyridin-1(2H)-yl)-3-phenylprop-2-yn-1-yl)carbamate (**5a**)

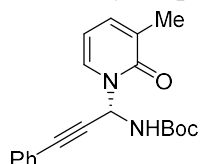

Prepared from 3-methylpyridin-2(1H)-one (10.9 mg, 0.1 mmol, 1.0 equiv) and *tert*-butyl (1-ethoxy-3-phenylprop-2-yn-1-yl)carbamate (110.0 mg, 0.4 mmol, 4.0 equiv) according to the general procedure in the presence of **C2** (7.2 mg, 0.01 mmol, 10 mol %), purified by silica gel column chromatography (petroleum ether/ EtOAc = 10:1 to 3:1) and was obtained as a white solid (26.4 mg, 78%), mp: 90-92 °C.

$R_f$  (Petroleum ether/ EtOAc = 3:1) = 0.5.

**HPLC** (IC, *n*-hexane/*i*-PrOH = 70/30, flow rate = 1.0 mL/min, I = 215 nm)  $t_R$  = 10.73 min (minor), 12.67 min (major), 93% ee.

$[\alpha]_D^{25}$ : -35.12 (c = 0.25, CH<sub>2</sub>Cl<sub>2</sub>).

**<sup>1</sup>H NMR** (400 MHz, CDCl<sub>3</sub>)  $\delta$  7.51 (d, *J* = 6.4 Hz, 1H), 7.44 (d, *J* = 7.2 Hz, 2H), 7.36-7.25 (m, 3H), 7.20 (d, *J* = 6.4 Hz, 1H), 6.76 (s, 1H), 6.61 (s, 1H), 6.13 (t, *J* = 6.8 Hz, 1H), 2.17 (s, 3H), 1.43 (s, 9H).

**<sup>13</sup>C NMR** (100 MHz, CDCl<sub>3</sub>)  $\delta$  162.3, 154.0, 137.2, 133.4, 132.0, 130.4, 129.0, 128.3, 121.6, 105.6, 85.0, 83.1, 81.0, 59.3, 28.2, 17.0.

**HRMS (ESI)** m/z: [M+Na]<sup>+</sup> Calcd for C<sub>20</sub>H<sub>22</sub>N<sub>2</sub>NaO<sub>3</sub> 361.1523; Found 361.1523.

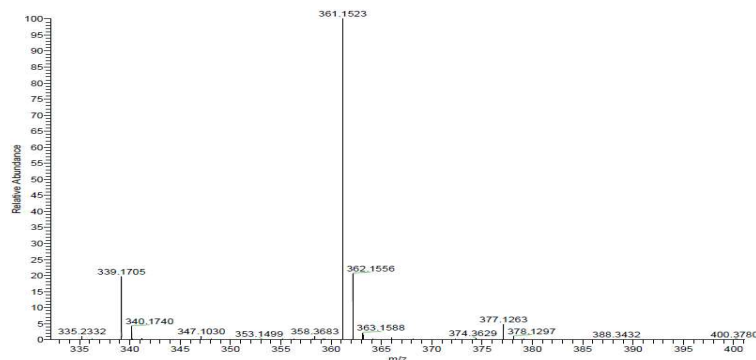

***tert*-Butyl (*S*)-1-(3-methyl-2-oxopyridin-1(2H)-yl)-3-(*p*-tolyl)prop-2-yn-1-yl)carbamate (**5b**)**

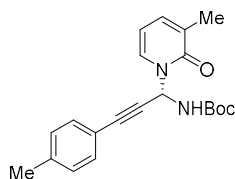

Prepared from 3-methylpyridin-2(1H)-one (10.9 mg, 0.1 mmol, 1.0 equiv) and *tert*-butyl (1-ethoxy-3-(*p*-tolyl)prop-2-yn-1-yl)carbamate (115.7 mg, 0.4 mmol, 4.0 equiv) according to the general procedure in the presence of **C2** (7.2 mg, 0.01 mmol, 10 mol %), purified by silica gel column chromatography (petroleum ether/ EtOAc = 10:1 to 3:1) and was obtained as a white solid (27.5 mg, 78%), mp: 153-155 °C.

**R<sub>f</sub>** (Petroleum ether/ EtOAc = 3:1) = 0.4.

**HPLC** (IC, *n*-hexane/*i*-PrOH = 80/20, flow rate = 2.0 mL/min, I = 215 nm) *t<sub>R</sub>* = 9.46 min (minor), 12.13 min (major), 92% ee.

**[α]<sub>D</sub><sup>25</sup>**: +2.00 (c = 0.25, CH<sub>2</sub>Cl<sub>2</sub>).

**<sup>1</sup>H NMR** (400 MHz, CDCl<sub>3</sub>) δ 7.50 (d, *J* = 6.4 Hz, 1H), 7.33 (d, *J* = 7.6 Hz, 2H), 7.23-7.15 (m, 1H), 7.09 (d, *J* = 7.6 Hz, 2H), 6.75 (s, 1H), 6.54 (s, 1H), 6.12 (t, *J* = 6.8 Hz, 1H), 2.33 (s, 3H), 2.16 (s, 3H), 1.42 (s, 9H).

**<sup>13</sup>C NMR** (100 MHz, CDCl<sub>3</sub>) δ 162.2, 154.0, 139.2, 137.2, 133.3, 131.9, 130.4, 129.0, 118.5, 105.6, 85.2, 82.4, 81.0, 59.4, 28.2, 21.5, 17.0.

**HRMS (ESI)** *m/z*: [M+Na]<sup>+</sup> Calcd for C<sub>21</sub>H<sub>24</sub>N<sub>2</sub>NaO<sub>3</sub> 375.1679; Found 375.1675.

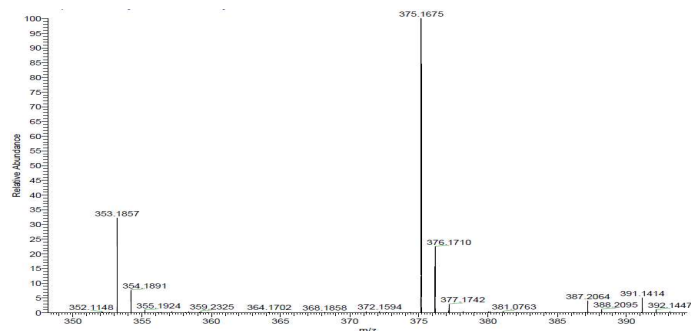

***tert*-Butyl (*S*)-1-(3-(4-chlorophenyl)-1-(3-methyl-2-oxopyridin-1(2H)-yl)prop-2-yn-1-yl)carbamate (**5c**)**

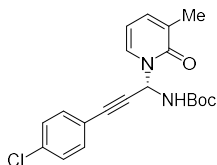

Prepared from 3-methylpyridin-2(1H)-one (10.9 mg, 0.1 mmol, 1.0 equiv) and *tert*-butyl (3-(4-chlorophenyl)-1-ethoxyprop-2-yn-1-yl)carbamate (123.6 mg, 0.4 mmol, 4.0 equiv) according to the general procedure in the presence of **C2** (7.2 mg, 0.01 mmol, 10 mol %), purified by silica gel column chromatography (petroleum ether/ EtOAc = 10:1 to 3:1) and was obtained as a white solid (23.8 mg, 64%), mp: 173-175 °C.

**R<sub>f</sub>** (Petroleum ether/ EtOAc = 3:1) = 0.4.

**HPLC** (IA, *n*-hexane/*i*-PrOH = 70/30, flow rate = 1.0 mL/min, I = 215 nm) *t<sub>R</sub>* = 5.56 min (major), 6.10 min (minor), 82% ee.

**[α]<sub>D</sub><sup>25</sup>**: -12.43 (c = 0.25, CH<sub>2</sub>Cl<sub>2</sub>).

**<sup>1</sup>H NMR** (400 MHz, DMSO-d<sub>6</sub>) δ 8.84 (d, *J* = 7.6 Hz, 1H), 7.71 (d, *J* = 6.4 Hz, 1H), 7.55-7.43 (m, 4H), 7.39-7.27 (m, 2H), 6.30 (t, *J* = 6.8 Hz, 1H), 2.02 (s, 3H), 1.39 (s, 9H).

**<sup>13</sup>C NMR** (100 MHz, DMSO-d<sub>6</sub>) δ 165.7, 158.9, 142.3, 139.4, 138.7, 136.4, 134.2, 133.6, 124.9, 111.3, 91.2, 87.9, 85.1, 58.3, 33.2, 22.1.

**HRMS (ESI)** *m/z*: [M+Na]<sup>+</sup> Calcd for C<sub>20</sub>H<sub>21</sub>ClN<sub>2</sub>NaO<sub>3</sub> 395.1133; Found 395.1132.

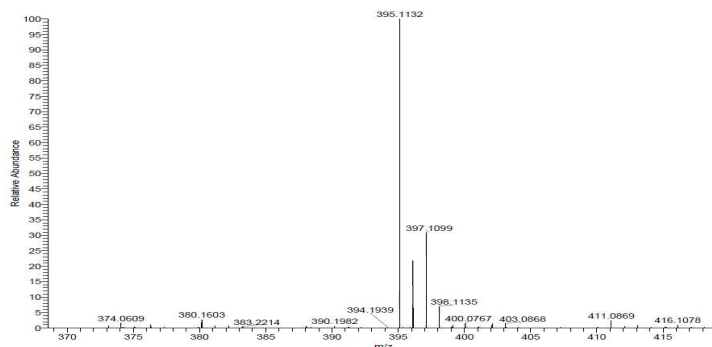

***tert*-Butyl (*S*)-(1-(3-methyl-2-oxopyridin-1(2H)-yl)-3-(*m*-tolyl)prop-2-yn-1-yl)carbamate (**5d**)**

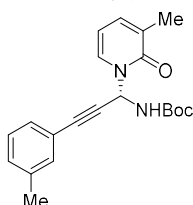

Prepared from 3-methylpyridin-2(1H)-one (10.9 mg, 0.1 mmol, 1.0 equiv) and *tert*-butyl (1-ethoxy-3-(*m*-tolyl)prop-2-yn-1-yl)carbamate (115.7 mg, 0.4 mmol, 4.0 equiv) according to the general procedure in the presence of **C2** (7.2 mg, 0.01 mmol, 10 mol %), purified by silica gel column chromatography (petroleum ether/ EtOAc = 10:1 to 3:1) and was obtained as a white solid (31.0 mg, 88%), mp: 148-150 °C.

**R<sub>f</sub>** (Petroleum ether/ EtOAc = 3:1) = 0.4.

**HPLC** (IC, *n*-hexane/*i*-PrOH = 70/30, flow rate = 1.0 mL/min, I = 215 nm) *t<sub>R</sub>* = 14.09 min (minor), 16.42 min (major), 90% ee.

**[α]<sub>D</sub><sup>25</sup>**: -16.64 (c = 0.25, CH<sub>2</sub>Cl<sub>2</sub>).

**<sup>1</sup>H NMR** (400 MHz, CDCl<sub>3</sub>) δ 7.52 (d, *J* = 6.4 Hz, 1H), 7.27-7.06 (m, 5H), 6.76 (s, 1H), 6.66 (s, 1H), 6.12 (t, *J* = 6.8 Hz, 1H), 2.29 (s, 3H), 2.16 (s, 3H), 1.43 (s, 9H).

**<sup>13</sup>C NMR** (100 MHz, CDCl<sub>3</sub>) δ 162.2, 154.0, 137.9, 137.2, 133.4, 132.6, 130.2, 129.8, 129.0, 128.1, 121.4, 105.7, 85.2, 82.9, 80.9, 59.0, 28.2, 21.2, 17.1.

**HRMS (ESI)** *m/z*: [M+Na]<sup>+</sup> Calcd for C<sub>21</sub>H<sub>24</sub>N<sub>2</sub>NaO<sub>3</sub> 375.1679; Found 375.1682.

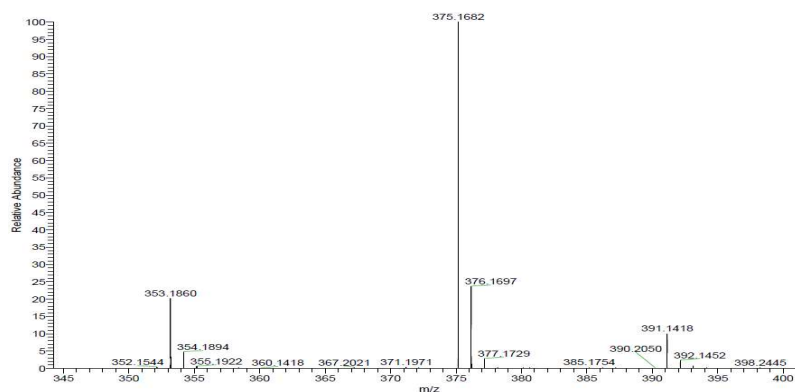

***tert*-Butyl (S)-(3-cyclopropyl-1-(3-methyl-2-oxopyridin-1(2H)-yl)prop-2-yn-1-yl)carbamate (5e)**

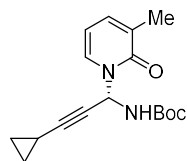

Prepared from 3-methylpyridin-2(1H)-one (10.9 mg, 0.1 mmol, 1.0 equiv) and *tert*-butyl (3-cyclopropyl-1-ethoxyprop-2-yn-1-yl)carbamate (95.7 mg, 0.4 mmol, 4.0 equiv) according to the general procedure in the presence of **C2** (7.2 mg, 0.01 mmol, 10 mol %), purified by silica gel column chromatography (petroleum ether/ EtOAc = 10:1 to 3:1) and was obtained as a white solid (26.3 mg, 87%), mp: 176-178 °C.

$R_f$  (Petroleum ether/ EtOAc = 3:1) = 0.3.

**HPLC** (IC, *n*-hexane/*i*-PrOH = 50/50, flow rate = 2.0 mL/min, I = 215 nm)  $t_R$  = 6.70 min (minor), 11.15 min (major), 94% ee.

$[\alpha]_D^{25}$ : -44.80 (c = 0.25, CH<sub>2</sub>Cl<sub>2</sub>).

**<sup>1</sup>H NMR** (400 MHz, CDCl<sub>3</sub>)  $\delta$  7.39 (dd,  $J$  = 6.8, 1.2 Hz, 1H), 7.22-7.12 (m, 1H), 6.46 (s, 1H), 6.32 (s, 1H), 6.10 (t,  $J$  = 6.8 Hz, 1H), 2.15 (s, 3H), 1.40 (s, 9H), 1.31-1.22 (m, 1H), 0.82-0.73 (m, 2H), 0.73-0.66 (m, 2H).

**<sup>13</sup>C NMR** (100 MHz, CDCl<sub>3</sub>)  $\delta$  162.7, 154.5, 137.6, 133.9, 130.8, 106.0, 89.7, 81.4, 70.0, 59.6, 28.8, 17.6, 8.9, 8.8, 0.0.

**HRMS (ESI)**  $m/z$ : [M+Na]<sup>+</sup> Calcd for C<sub>17</sub>H<sub>22</sub>N<sub>2</sub>NaO<sub>3</sub> 325.1523; Found 325.1519.

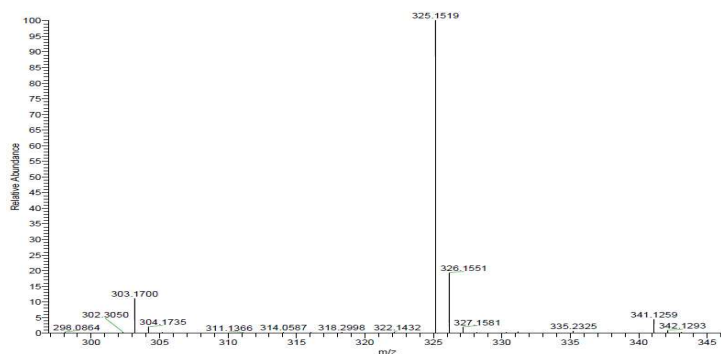

***tert*-Butyl (S)-(1-(3-methyl-2-oxopyridin-1(2H)-yl)-3-(trimethylsilyl)prop-2-yn-1-yl)carbamate (5f)**

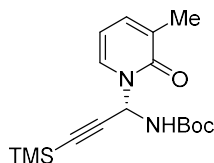

Prepared from 3-methylpyridin-2(1H)-one (10.9 mg, 0.1 mmol, 1.0 equiv) and *tert*-butyl (1-ethoxy-3-(trimethylsilyl)prop-2-yn-1-yl)carbamate (108.5 mg, 0.4 mmol, 4.0 equiv) according to the general procedure in the presence of **C2** (7.2 mg, 0.01 mmol, 10 mol %), purified by silica gel column chromatography (petroleum ether/ EtOAc = 10:1 to 3:1) and was obtained as a white solid (27.1 mg, 81%), mp: 165-167 °C.

$R_f$  (Petroleum ether/ EtOAc = 3:1) = 0.5.

**HPLC** (IC, *n*-hexane/*i*-PrOH = 80/20, flow rate = 1.0 mL/min, I = 215 nm)  $t_R$  = 7.24 min (minor), 9.87 min (major), 89% ee.

$[\alpha]_D^{25}$ : -37.04 ( $c = 0.25$ ,  $\text{CH}_2\text{Cl}_2$ ).

$^1\text{H NMR}$  (400 MHz,  $\text{CDCl}_3$ )  $\delta$  7.43 (d,  $J = 6.0$  Hz, 1H), 7.22-7.16 (m, 1H), 6.58 (s, 1H), 6.27 (s, 1H), 6.11 (t,  $J = 6.8$  Hz, 1H), 2.15 (s, 3H), 1.41 (s, 9H), 0.17 (s, 9H).

$^{13}\text{C NMR}$  (100 MHz,  $\text{CDCl}_3$ )  $\delta$  162.4, 154.2, 137.4, 133.5, 130.5, 105.9, 98.9, 91.0, 81.3, 58.5, 28.6, 17.5, 0.0.

**HRMS (ESI)**  $m/z$ :  $[\text{M}+\text{Na}]^+$  Calcd for  $\text{C}_{17}\text{H}_{26}\text{N}_2\text{NaO}_3\text{Si}$  357.1605, Found 357.1602.

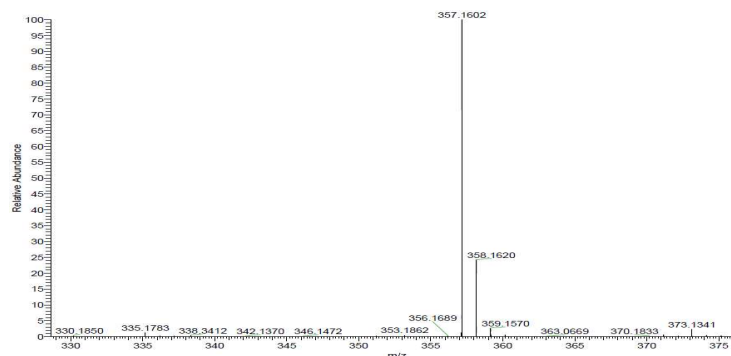

### *tert*-Butyl (*S*)-(1-(3-methyl-2-oxopyridin-1(2H)-yl)propyl)carbamate (**5g**)

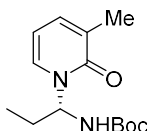

Prepared from 3-methylpyridin-2(1H)-one (10.9 mg, 0.1 mmol, 1.0 equiv) and *tert*-butyl (1-ethoxypropyl)carbamate (81.3 mg, 0.4 mmol, 4.0 equiv) according to the general procedure in the presence of **C2** (7.2 mg, 0.01 mmol, 10 mol %), purified by silica gel column chromatography (petroleum ether/ EtOAc = 10:1 to 3:1) and was obtained as a white solid (5.6 mg, 21%), mp: 144-146 °C.

$R_f$  (Petroleum ether/ EtOAc = 3:1) = 0.3.

**HPLC** (IC, *n*-hexane/*i*-PrOH = 70/30, flow rate = 2.0 mL/min, I = 215 nm)  $t_R$  = 3.46 min (major), 4.33 min (minor), 66% ee.

$[\alpha]_D^{25}$ : +70.80 ( $c = 0.05$ ,  $\text{CH}_2\text{Cl}_2$ ).

$^1\text{H NMR}$  (400 MHz,  $\text{CDCl}_3$ )  $\delta$  7.21 (d,  $J = 6.8$  Hz, 1H), 7.16 (d,  $J = 6.8$  Hz, 1H), 6.46 (d,  $J = 7.2$  Hz, 1H), 6.09 (t,  $J = 6.8$  Hz, 1H), 5.36 (d,  $J = 5.6$  Hz, 1H), 2.38-2.18 (m, 1H), 2.13 (s, 3H), 2.11-1.95 (m, 1H), 1.41 (s, 9H), 0.88 (t,  $J = 7.2$  Hz, 3H).

$^{13}\text{C NMR}$  (100 MHz,  $\text{CDCl}_3$ )  $\delta$  163.2, 155.0, 137.0, 134.9, 130.5, 105.4, 80.1, 73.4, 28.2, 26.1, 16.9, 10.4.

**HRMS (ESI)**  $m/z$ :  $[\text{M}+\text{Na}]^+$  Calcd for  $\text{C}_{14}\text{H}_{22}\text{N}_2\text{NaO}_3$  289.1523; Found 289.1523.

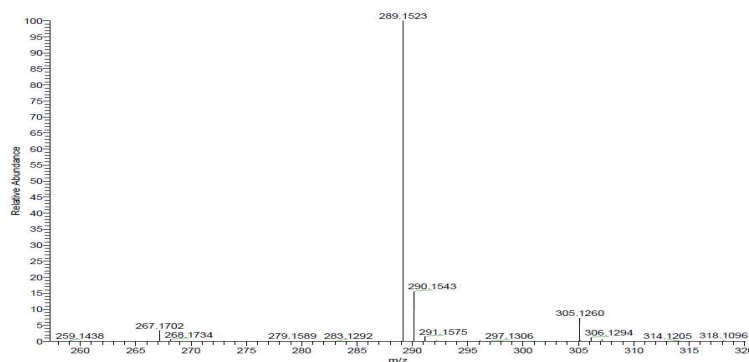

### Benzyl (*S*)-1-(3-methyl-2-oxopyridin-1(2H)-yl)-3-phenylprop-2-yn-1-yl)carbamate (**5h**)

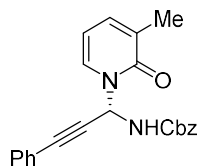

Prepared from 3-methylpyridin-2(1H)-one (10.9 mg, 0.1 mmol, 1.0 equiv) and benzyl (1-ethoxy-3-phenylprop-2-yn-1-yl)carbamate (123.6 mg, 0.4 mmol, 4.0 equiv) according to the general procedure in the presence of **C2** (7.2 mg, 0.01 mmol, 10 mol %), purified by silica gel column chromatography (petroleum ether/ EtOAc = 10:1 to 3:1) and was obtained as colorless oil (16.0 mg, 43%).

$R_f$  (Petroleum ether/ EtOAc = 3:1) = 0.3.

**HPLC** (IA, *n*-hexane/*i*-PrOH = 70/30, flow rate = 1.0 mL/min, I = 215 nm)  $t_R$  = 7.35 min (minor), 8.02 min (major), 76% ee.

$[\alpha]_D^{25}$ : -27.69 ( $c$  = 0.15, CH<sub>2</sub>Cl<sub>2</sub>).

**<sup>1</sup>H NMR** (400 MHz, CDCl<sub>3</sub>)  $\delta$  7.56 (d,  $J$  = 6.4 Hz, 1H), 7.46-7.40 (m, 2H), 7.38-7.25 (m, 8H), 7.20 (d,  $J$  = 6.0 Hz, 1H), 6.88 (s, 1H), 6.81 (s, 1H), 6.12 (t,  $J$  = 6.8 Hz, 1H), 5.14 (d,  $J$  = 12.0 Hz, 1H), 5.06 (d,  $J$  = 12.0 Hz, 1H), 2.15 (s, 3H).

**<sup>13</sup>C NMR** (100 MHz, CDCl<sub>3</sub>)  $\delta$  162.2, 155.0, 137.4, 135.8, 133.5, 132.0, 130.4, 129.1, 128.5, 128.31, 128.27, 128.2, 121.5, 105.8, 85.6, 82.7, 67.4, 59.2, 17.1.

**HRMS (ESI)**  $m/z$ : [M+Na]<sup>+</sup> Calcd for C<sub>23</sub>H<sub>20</sub>N<sub>2</sub>NaO<sub>3</sub> 395.1366; Found 395.1365.

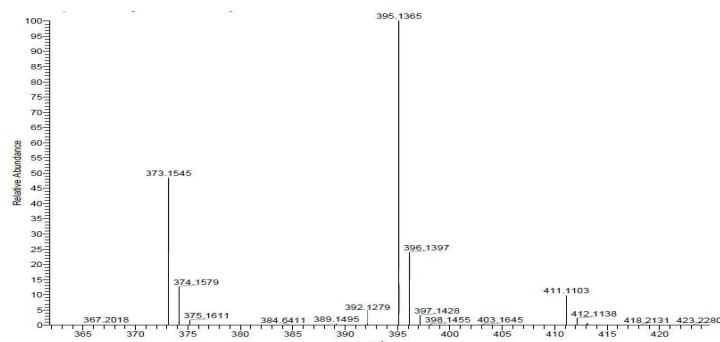

### (*S*)-N-(1-(3-methyl-2-oxopyridin-1(2H)-yl)-3-phenylprop-2-yn-1-yl)benzamide (**5i**)

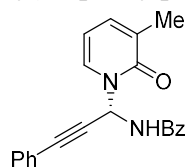

Prepared from 3-methylpyridin-2(1H)-one (10.9 mg, 0.1 mmol, 1.0 equiv) and N-(1-ethoxy-3-phenylprop-2-yn-1-yl)benzamide (111.6 mg, 0.4 mmol, 4.0 equiv) according to the general procedure in the presence of **C2** (7.2 mg, 0.01 mmol, 10 mol %), purified by silica gel column chromatography (petroleum ether/ EtOAc = 10:1 to 3:1) and was obtained as a white solid (28.1 mg, 82%), mp: 193-195 °C.

$R_f$  (Petroleum ether/ EtOAc = 3:1) = 0.2.

**HPLC** (IA, *n*-hexane/*i*-PrOH = 90/10, flow rate = 1.0 mL/min, I = 215 nm)  $t_R$  = 13.53 min (minor), 14.87 min (major), 54% ee.

$[\alpha]_D^{25}$ : +5.36 ( $c$  = 0.25, CH<sub>2</sub>Cl<sub>2</sub>).

**<sup>1</sup>H NMR** (400 MHz, CDCl<sub>3</sub>) δ 8.69 (d, *J* = 8.4 Hz, 1H), 7.93-7.79 (m, 2H), 7.66 (d, *J* = 6.4 Hz, 1H), 7.51-7.36 (m, 5H), 7.34-7.24 (m, 3H), 7.20 (d, *J* = 6.4 Hz, 1H), 7.11 (d, *J* = 8.4 Hz, 1H), 6.14 (t, *J* = 6.8 Hz, 1H), 2.13 (s, 3H).

**<sup>13</sup>C NMR** (100 MHz, CDCl<sub>3</sub>) δ 166.4, 162.6, 137.6, 134.5, 132.8, 132.3, 132.1, 130.6, 129.0, 128.6, 128.3, 127.6, 121.6, 105.8, 85.2, 82.9, 59.1, 16.9.

**HRMS (ESI)** *m/z*: [M+Na]<sup>+</sup> Calcd for C<sub>22</sub>H<sub>18</sub>N<sub>2</sub>NaO<sub>2</sub> 365.1260; Found 365.1262.

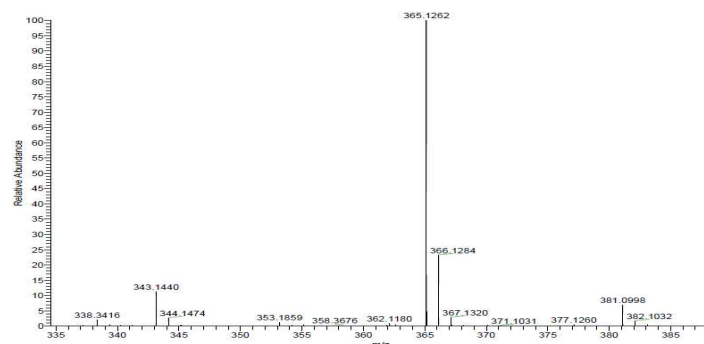

***tert*-Butyl (S)-(1-(3-chloro-2-oxopyridin-1(2H)-yl)-3-phenylprop-2-yn-1-yl)carbamate (5j)**

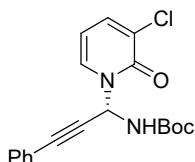

Prepared from 3-chloropyridin-2(1H)-one (12.9 mg, 0.1 mmol, 1.0 equiv) and *tert*-butyl (1-ethoxy-3-phenylprop-2-yn-1-yl)carbamate (110.0 mg, 0.4 mmol, 4.0 equiv) according to the general procedure in the presence of **C2** (7.2 mg, 0.01 mmol, 10 mol %), purified by silica gel column chromatography (petroleum ether/ EtOAc = 10:1 to 3:1) and was obtained as a white solid (22.9 mg, 64%), mp: 189-191 °C.

**R<sub>f</sub>** (Petroleum ether/ EtOAc = 3:1) = 0.4.

**HPLC** (IC, *n*-hexane/*i*-PrOH = 90/10, flow rate = 2.0 mL/min, I = 215 nm) *t<sub>R</sub>* = 13.93 min (minor), 16.17 min (major), 76% ee.

**[α]<sub>D</sub><sup>25</sup>**: -16.88 (c = 0.25, CH<sub>2</sub>Cl<sub>2</sub>).

**<sup>1</sup>H NMR** (400 MHz, CDCl<sub>3</sub>) δ 7.70-7.59 (m, 1H), 7.54 (dd, *J* = 7.2, 2.0 Hz, 1H), 7.48-7.40 (m, 2H), 7.37-7.26 (m, 3H), 6.72 (s, 1H), 6.57 (s, 1H), 6.18 (t, *J* = 7.2 Hz, 1H), 1.43 (s, 9H).

**<sup>13</sup>C NMR** (100 MHz, CDCl<sub>3</sub>) δ 158.2, 153.9, 138.1, 134.9, 132.0, 129.2, 128.3, 126.6, 121.3, 105.3, 85.7, 82.1, 81.3, 60.3, 28.2.

**HRMS (ESI)** *m/z*: [M+H]<sup>+</sup> Calcd for C<sub>19</sub>H<sub>19</sub>ClN<sub>2</sub>NaO<sub>3</sub> 381.0976; Found 381.0978.

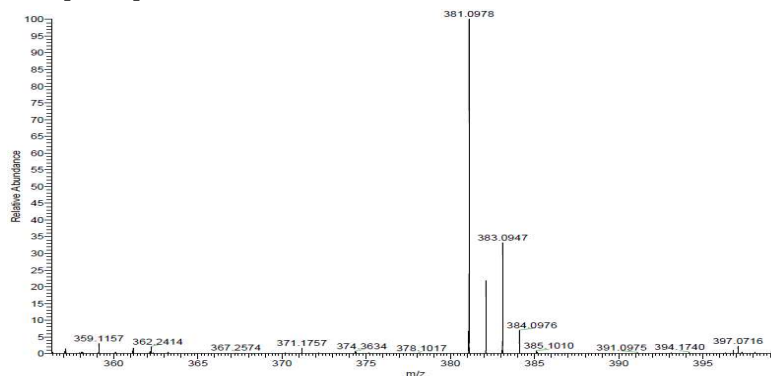

***tert*-Butyl (S)-(1-(2-oxo-3-(trifluoromethyl)pyridin-1(2H)-yl)-3-phenylprop-2-yn-1-yl)carbamate (5k)**

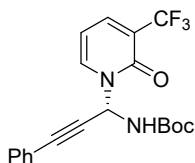

Prepared from 3-(trifluoromethyl)pyridin-2(1H)-one (16.3 mg, 0.1 mmol, 1.0 equiv) and *tert*-butyl (1-ethoxy-3-phenylprop-2-yn-1-yl)carbamate (110.0 mg, 0.4 mmol, 4.0 equiv) according to the general procedure in the presence of **C2** (7.2 mg, 0.01 mmol, 10 mol %), purified by silica gel column chromatography (petroleum ether/ EtOAc = 10:1 to 3:1) and was obtained as colorless oil (23.5 mg, 60%).

**R<sub>f</sub>** (Petroleum ether/ EtOAc = 3:1) = 0.5.

**HPLC** (IE, *n*-hexane/*i*-PrOH = 80/20, flow rate = 1.0 mL/min, I = 215 nm) *t<sub>R</sub>* = 9.89 min (major), 11.96 min (minor), 72% ee.

**[α]<sub>D</sub><sup>25</sup>**: -6.08 (c = 0.25, CH<sub>2</sub>Cl<sub>2</sub>).

**<sup>1</sup>H NMR** (400 MHz, CDCl<sub>3</sub>) δ 8.06 (d, *J* = 6.8 Hz, 1H), 7.74 (d, *J* = 6.8 Hz, 1H), 7.45-7.39 (m, 2H), 7.37-7.25 (m, 3H), 6.81 (s, 2H), 6.28 (t, *J* = 6.8 Hz, 1H), 1.43 (s, 9H).

**<sup>13</sup>C NMR** (75 MHz, DMSO-*d*<sub>6</sub>) δ 156.6, 154.1, 140.9 (q, *J* = 4.5 Hz), 139.4, 132.2, 130.0, 129.2, 123.3 (q, *J* = 270.0 Hz), 121.0, 118.6 (q, *J* = 30.0 Hz), 105.6, 85.1, 84.2, 80.6, 54.4, 28.3.

**<sup>19</sup>F NMR** (376 MHz, DMSO-*D*<sub>6</sub>) δ -70.2.

**HRMS (ESI)** *m/z*: [M+Na]<sup>+</sup> Calcd for C<sub>20</sub>H<sub>19</sub>F<sub>3</sub>N<sub>2</sub>NaO<sub>3</sub> 415.1240; Found 415.1237.

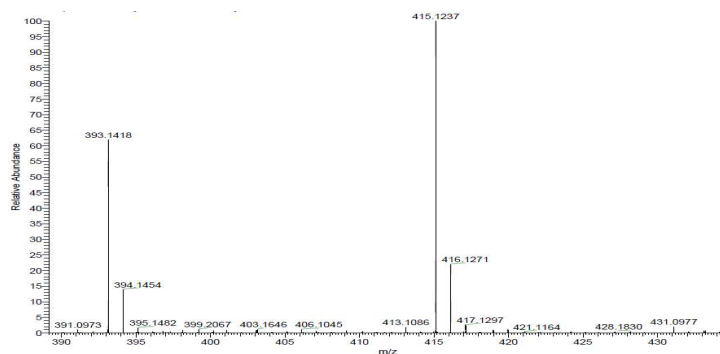

***tert*-Butyl (S)-(1-(4-methyl-2-oxopyridin-1(2H)-yl)-3-phenylprop-2-yn-1-yl)carbamate (5l)**

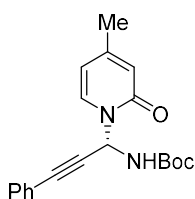

Prepared from 4-methylpyridin-2(1H)-one (10.9 mg, 0.1 mmol, 1.0 equiv) and *tert*-butyl (1-ethoxy-3-phenylprop-2-yn-1-yl)carbamate (110.0 mg, 0.4 mmol, 4.0 equiv) according to the general procedure in the presence of **C2** (7.2 mg, 0.01 mmol, 10 mol %), purified by silica gel column chromatography (petroleum ether/ EtOAc = 10:1 to 3:1) and was obtained as a white solid (20.3 mg, 60%), mp: 213-215 °C.

**R<sub>f</sub>** (Petroleum ether/ EtOAc = 3:1) = 0.2.

**HPLC** (IC, *n*-hexane/*i*-PrOH = 50/50, flow rate = 1.0 mL/min, I = 215 nm) *t<sub>R</sub>* = 7.84 min (minor), 9.89 min (major), 83% ee.



$[\alpha]_{\text{D}}^{25}$ : +8.24 (c = 0.25, CH<sub>2</sub>Cl<sub>2</sub>).

<sup>1</sup>H NMR (400 MHz, CDCl<sub>3</sub>) δ 7.51 (d, *J* = 6.8 Hz, 1H), 7.47-7.42 (m, 2H), 7.37-7.26 (m, 3H), 6.67 (s, 1H), 6.53 (s, 1H), 6.37 (s, 1H), 6.04 (dd, *J* = 7.2, 2.0 Hz, 1H), 2.17 (s, 3H), 1.43 (s, 9H).

<sup>13</sup>C NMR (100 MHz, CDCl<sub>3</sub>) δ 161.9, 154.0, 151.9, 134.9, 132.0, 129.0, 128.3, 121.6, 119.8, 108.6, 85.2, 82.9, 81.0, 58.9, 28.3, 21.4.

HRMS (ESI) *m/z*: [M+Na]<sup>+</sup> Calcd for C<sub>20</sub>H<sub>22</sub>N<sub>2</sub>NaO<sub>3</sub> 361.1523; Found 361.1519.

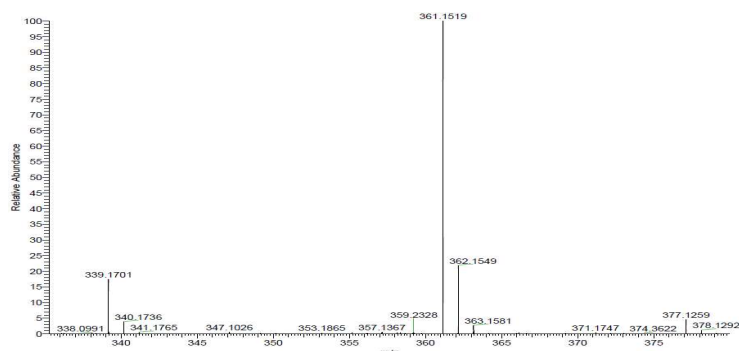

***tert*-Butyl (*S*)-(1-(5-methyl-2-oxopyridin-1(2H)-yl)-3-phenylprop-2-yn-1-yl)carbamate (5m)**

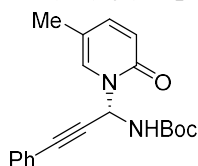

Prepared from 5-methylpyridin-2(1H)-one (10.9 mg, 0.1 mmol, 1.0 equiv) and *tert*-butyl (1-ethoxy-3-phenylprop-2-yn-1-yl)carbamate (110.0 mg, 0.4 mmol, 4.0 equiv) according to the general procedure in the presence of **C2** (7.2 mg, 0.01 mmol, 10 mol %), purified by silica gel column chromatography (petroleum ether/ EtOAc = 10:1 to 3:1) and was obtained as a white solid (30.8 mg, 91%), mp: 176-178 °C.

**R<sub>f</sub>** (Petroleum ether/ EtOAc = 3:1) = 0.2.

**HPLC** (AS-H, *n*-hexane/*i*-PrOH = 90/10, flow rate = 1.0 mL/min, I = 215 nm) *t<sub>R</sub>* = 7.74 min (major), 10.97 min (minor), 88% ee.

$[\alpha]_{\text{D}}^{25}$ : +5.44 (c = 0.25, CH<sub>2</sub>Cl<sub>2</sub>).

<sup>1</sup>H NMR (400 MHz, CDCl<sub>3</sub>) δ 7.47-7.41 (m, 2H), 7.37-7.25 (m, 4H), 7.20 (dd, *J* = 9.2, 2.4 Hz, 1H), 6.65 (s, 2H), 6.53 (d, *J* = 9.2 Hz, 1H), 2.09 (s, 3H), 1.43 (s, 9H).

<sup>13</sup>C NMR (100 MHz, CDCl<sub>3</sub>) δ 161.2, 154.0, 142.8, 133.3, 132.0, 129.0, 128.3, 121.6, 121.1, 115.1, 84.9, 83.2, 81.0, 59.2, 28.3, 17.2.

HRMS (ESI) *m/z*: [M+Na]<sup>+</sup> Calcd for C<sub>20</sub>H<sub>22</sub>N<sub>2</sub>NaO<sub>3</sub> 361.1523, Found 361.1518.

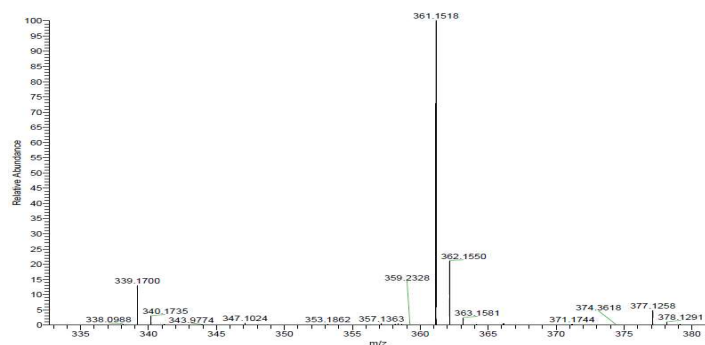

***tert*-Butyl (*S*)-(1-(2-oxopyridin-1(2H)-yl)-3-phenylprop-2-yn-1-yl)carbamate (**5n**)**

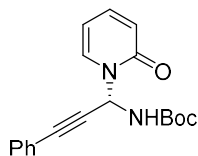

Prepared from pyridin-2(1H)-one (9.5 mg, 0.1 mmol, 1.0 equiv) and *tert*-butyl (1-ethoxy-3-phenylprop-2-yn-1-yl)carbamate (110.0 mg, 0.4 mmol, 4.0 equiv) according to the general procedure in the presence of **C2** (7.2 mg, 0.01 mmol, 10 mol %), purified by silica gel column chromatography (petroleum ether/ EtOAc = 10:1 to 3:1) and was obtained as a white solid (28.2 mg, 87%), mp: 188-190 °C.

**R<sub>f</sub>** (Petroleum ether/ EtOAc = 3:1) = 0.2.

**HPLC** (IC, *n*-hexane/*i*-PrOH = 80/20, flow rate = 1.2 mL/min, I = 215 nm) *t<sub>R</sub>* = 17.46 min (minor), 19.19 min (major), 82% ee.

**[α]<sub>D</sub><sup>25</sup>**: +26.16 (c = 0.25, CH<sub>2</sub>Cl<sub>2</sub>).

**<sup>1</sup>H NMR** (400 MHz, CDCl<sub>3</sub>) δ 7.64 (dd, *J* = 6.8, 1.6 Hz, 1H), 7.48-7.40 (m, 2H), 7.39-7.27 (m, 4H), 6.72 (s, 1H), 6.58 (dd, *J* = 9.2, 0.4 Hz, 2H), 6.20 (td, *J* = 6.8, 1.2 Hz, 1H), 1.43 (s, 9H).

**<sup>13</sup>C NMR** (100 MHz, CDCl<sub>3</sub>) δ 161.9, 153.9, 140.1, 136.0, 132.0, 129.1, 128.3, 121.53, 121.47, 105.9, 85.3, 82.7, 81.1, 59.4, 28.2.

**HRMS (ESI)** *m/z*: [M+Na]<sup>+</sup> Calcd for C<sub>19</sub>H<sub>20</sub>N<sub>2</sub>NaO<sub>3</sub> 347.1366; Found 347.1363.

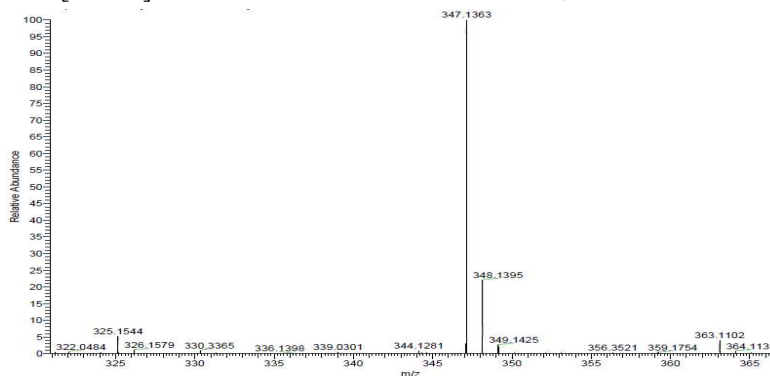

***tert*-Butyl (*S*)-(1-(1-oxoisoquinolin-2(1H)-yl)-3-phenylprop-2-yn-1-yl)carbamate (**5o**)**

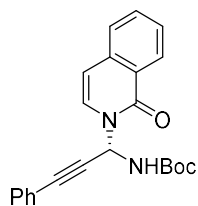

Prepared from isoquinolin-1(2H)-one (14.5 mg, 0.1 mmol, 1.0 equiv) and *tert*-butyl (1-ethoxy-3-phenylprop-2-yn-1-yl)carbamate (110.0 mg, 0.4 mmol, 4.0 equiv) according to the general procedure in the presence of **C2** (7.2 mg, 0.01 mmol, 10 mol %), purified by silica gel column chromatography (petroleum ether/ EtOAc = 20:1 to 5:1) and was obtained as colorless oil (10.1 mg, 27%).

**R<sub>f</sub>** (Petroleum ether/ EtOAc = 5:1) = 0.3.

**HPLC** (ID, *n*-hexane/*i*-PrOH = 60/40, flow rate = 1.0 mL/min, I = 215 nm) *t<sub>R</sub>* = 9.90 min (major), 12.20 min (minor), 96% ee.

**[α]<sub>D</sub><sup>25</sup>**: -8.40 (c = 0.1, CH<sub>2</sub>Cl<sub>2</sub>).

<sup>1</sup>H NMR (400 MHz, CDCl<sub>3</sub>) δ 8.48-8.41 (m, 1H), 7.69-7.57 (m, 1H), 7.55-7.37 (m, 5H), 7.36-7.25 (m, 3H), 6.89 (s, 1H), 6.54 (d, *J* = 7.6 Hz, 1H), 6.45 (s, 1H), 1.42 (s, 9H).

<sup>13</sup>C NMR (100 MHz, CDCl<sub>3</sub>) δ 161.5, 154.1, 137.0, 132.6, 132.0, 129.7, 129.0, 128.3, 128.0, 127.0, 126.4, 126.0, 121.6, 106.4, 84.8, 83.3, 80.8, 58.5, 28.3.

HRMS (ESI) *m/z*: [M+Na]<sup>+</sup> Calcd for C<sub>23</sub>H<sub>22</sub>N<sub>2</sub>NaO<sub>3</sub> 397.1523; Found 397.1527.

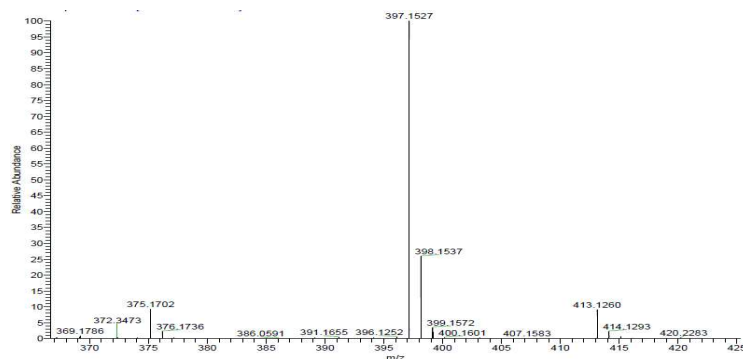

## Control Experiments for Scheme 4

### Gram-scale reaction

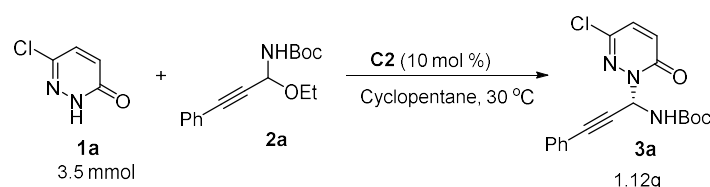

To a 100 mL of dry three-neck flask were added **C2** (251.6 mg, 0.35 mmol, 10 mol %), **1a** (455 mg, 3.5 mmol, 1.0 equiv) and **2a** (3.85 g, 14 mmol, 4.0 equiv), then Cyclopentane (50 mL) was added under argon atmosphere. The resulting mixture was stirred at 30 °C for 24 hours. The reaction mixture was concentrated under vacuum; the crude residue was purified by silica gel column chromatography (eluent: petroleum ether/EtOAc = 10:1-3:1) to give **3a** (1.12 g, 89 %, 94% ee).

### Scheme 4a

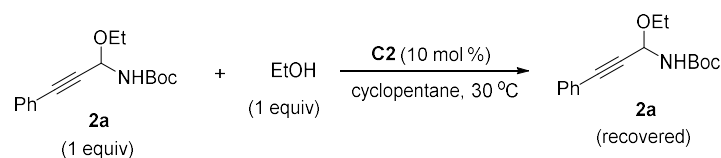

To a 10 mL of dry schlenk tube were added **2a** (13.8 mg, 0.05 mmol, 1.0 equiv) and EtOH (2.3 mg, 0.05 mmol, 1.0 equiv), then Cyclopentane (1 mL) was added under argon atmosphere. The resulting mixture was stirred at 30 °C. After a period of time, the reaction solution was monitored and the ee values were determined by HPLC.

| entry | t (h) | ee of recovered <b>2a</b> (%) |
|-------|-------|-------------------------------|
| 1     | 1     | 0                             |
| 2     | 3     | 0                             |
| 3     | 6     | 0                             |
| 4     | 12    | 0                             |
| 5     | 24    | 0                             |

### Scheme 4b

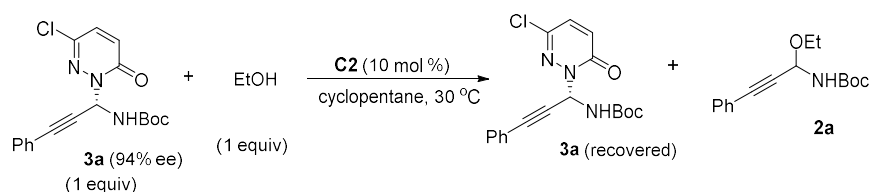

To a 10 mL of dry schlenk tube were added **3a** (18.0 mg, 0.05 mmol, 1.0 equiv), EtOH (2.3 mg, 0.05 mmol, 1.0 equiv) and **C2** (3.6 mg, 0.005 mmol, 10 mol %), then Cyclopentane (1 mL) was added under argon atmosphere. The resulting mixture was stirred at 30 °C. After a period of time, the reaction solution was monitored and the ee values were determined by HPLC.

| Entry | t (h) | ee of recovered <b>3a</b> (%) | yield of <b>2a</b> (%) | ee of <b>2a</b> (%) |
|-------|-------|-------------------------------|------------------------|---------------------|
| 1     | 6     | 94                            | <5                     | 0                   |
| 2     | 12    | 94                            | 6                      | 0                   |
| 3     | 18    | 92                            | 8                      | 0                   |
| 4     | 24    | 92                            | 17                     | 0                   |
| 5     | 48    | 92                            | 22                     | 0                   |

### Scheme 4c

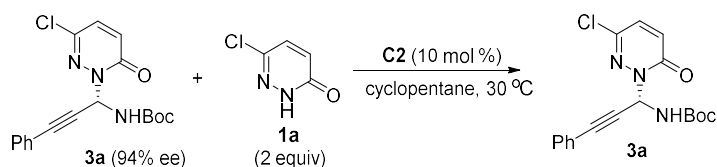

To a 10 mL of dry schlenk tube were added **3a** (18.0 mg, 0.05 mmol, 1.0 equiv), **1a** (13.0 mg, 0.1 mmol, 2.0 equiv) and **C2** (3.6 mg, 0.005 mmol, 10 mol %), then Cyclopentane (1 mL) was added under argon atmosphere. The resulting mixture was stirred at 30 °C. After a period of time, the reaction solution was monitored and the ee values were determined by HPLC.

| entry | t (h) | ee of <b>3a</b> |
|-------|-------|-----------------|
| 1     | 6     | 94              |
| 2     | 12    | 94              |
| 3     | 18    | 92              |
| 4     | 24    | 92              |
| 5     | 48    | 92              |
| 6     | 96    | 92              |

### Scheme 4d

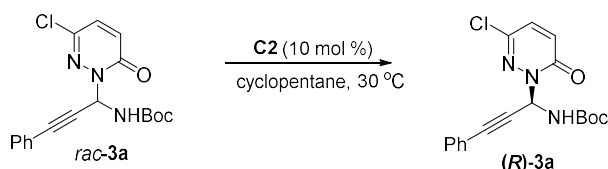

To a 10 mL of dry schlenk tube were added *rac*-**3a** (18.0 mg, 0.05 mmol, 1.0 equiv) and **C2** (3.6 mg, 0.005 mmol, 10 mol %), then Cyclopentane (1 mL) was added under argon atmosphere. The resulting mixture was stirred at 30 °C. After a period of time, the reaction solution was monitored and the ee values were determined by HPLC.

| entry | t (h) | ee of ( <i>R</i> )- <b>3a</b> |
|-------|-------|-------------------------------|
| 1     | 6     | -6                            |
| 2     | 12    | -6                            |
| 3     | 18    | -10                           |
| 4     | 24    | -10                           |
| 5     | 48    | -15                           |

### X-ray crystallographic data of **5f**

The crystal structures have been deposited at the Cambridge Crystallographic Data Centre. CCDC 2268745 (**5f**) contains the supplementary crystallographic data for this paper. These data can be obtained free of charge via the internet at [www.ccdc.cam.ac.uk/data-request/cif](http://www.ccdc.cam.ac.uk/data-request/cif).

The measurements were taken in a Bruker D8 Venture diffractometer. The data were integrated by Bruker D8 with multi-scan absorption corrections. The structure solution and refinement were processed by SHELXL.

### X-ray crystallographic data for **5f**

**Method of crystallization:** A solution of **5f** in dichloromethane and petroleum ether was evaporated the solvent slowly at room temperature.

### Crystal data and structure for **5f**

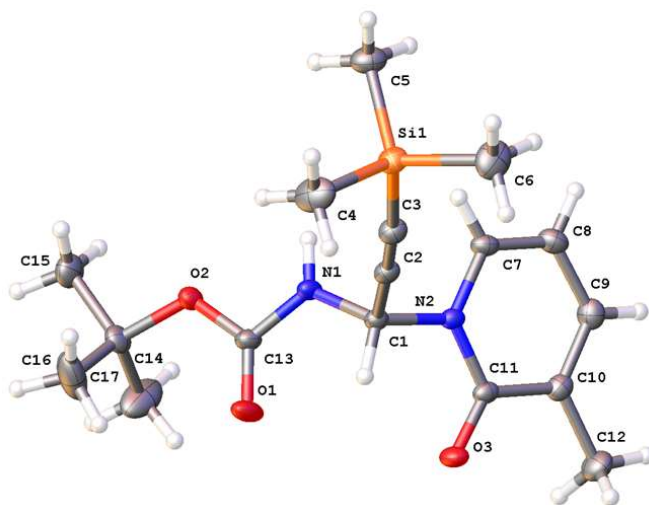

X-ray structure of **5f**. Thermal ellipsoids are shown at the 50% level.

|                      |                                                                  |                              |
|----------------------|------------------------------------------------------------------|------------------------------|
| Empirical formula    | C <sub>17</sub> H <sub>26</sub> N <sub>2</sub> O <sub>3</sub> Si |                              |
| Formula weight       | 334.49                                                           |                              |
| Temperature          | 213.00 K                                                         |                              |
| Wavelength           | 1.34139 Å                                                        |                              |
| Crystal system       | Monoclinic                                                       |                              |
| Space group          | P 1 21 1                                                         |                              |
| Unit cell dimensions | a = 9.3045(2) Å                                                  | $\alpha = 90^\circ$          |
|                      | b = 11.4846(2) Å                                                 | $\beta = 115.1230(10)^\circ$ |

|                                         |                                                              |                     |
|-----------------------------------------|--------------------------------------------------------------|---------------------|
|                                         | $c = 10.1085(2) \text{ \AA}$                                 | $\gamma = 90^\circ$ |
| Volume                                  | $977.99(3) \text{ \AA}^3$                                    |                     |
| Z                                       | 2                                                            |                     |
| Density (calculated)                    | $1.136 \text{ Mg/m}^3$                                       |                     |
| Absorption coefficient                  | $0.764 \text{ mm}^{-1}$                                      |                     |
| F(000)                                  | 360                                                          |                     |
| Crystal size                            | $0.07 \times 0.07 \times 0.05 \text{ mm}^3$                  |                     |
| $\theta$ range for data collection      | 4.203 to $54.886^\circ$                                      |                     |
| Index ranges                            | $-11 \leq h \leq 11, -13 \leq k \leq 13, -12 \leq l \leq 12$ |                     |
| Reflections collected                   | 11863                                                        |                     |
| Independent reflections                 | 3679 ( $R_{\text{int}} = 0.0473$ )                           |                     |
| Completeness to $\theta = 25.242^\circ$ | 99.7 %                                                       |                     |
| Max. and min. transmission              | 0.7508 and 0.5632                                            |                     |
| Data / restraints / parameters          | 3679 / 1 / 215                                               |                     |
| Goodness-of-fit on $F^2$                | 1.052                                                        |                     |
| Final R indices [ $I > 2\sigma(I)$ ]    | $R_1 = 0.0351, wR_2 = 0.0804$                                |                     |
| R indices (all data)                    | $R_1 = 0.0336, wR_2 = 0.0819$                                |                     |
| Largest diff. peak and hole             | 0.134 and $-0.202 \text{ e.\AA}^{-3}$                        |                     |
| Flack parameter                         | 0.049(17)                                                    |                     |

## References

- [1] (a) Wang, Y.; Wang, S.; Shan, W.; Shao, Z. *Nat. Commun.* **2020**, *11*, 226. (b) Sun, Z.; Chen, L.; Qiu, K.; Liu, B.; Li, H.; Yu, F. *Chem. Commun.*, **2022**, 58, 3035-3038. (c) Ma, X.-Y.; Zhang, C.-F.; Hu, X.; Zou, W.; Li, Y. *Tetrahedron*, **2020**, *76*, 131085.

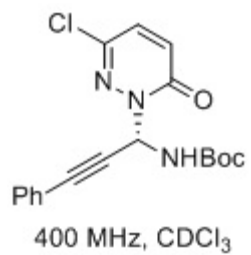

**3a**

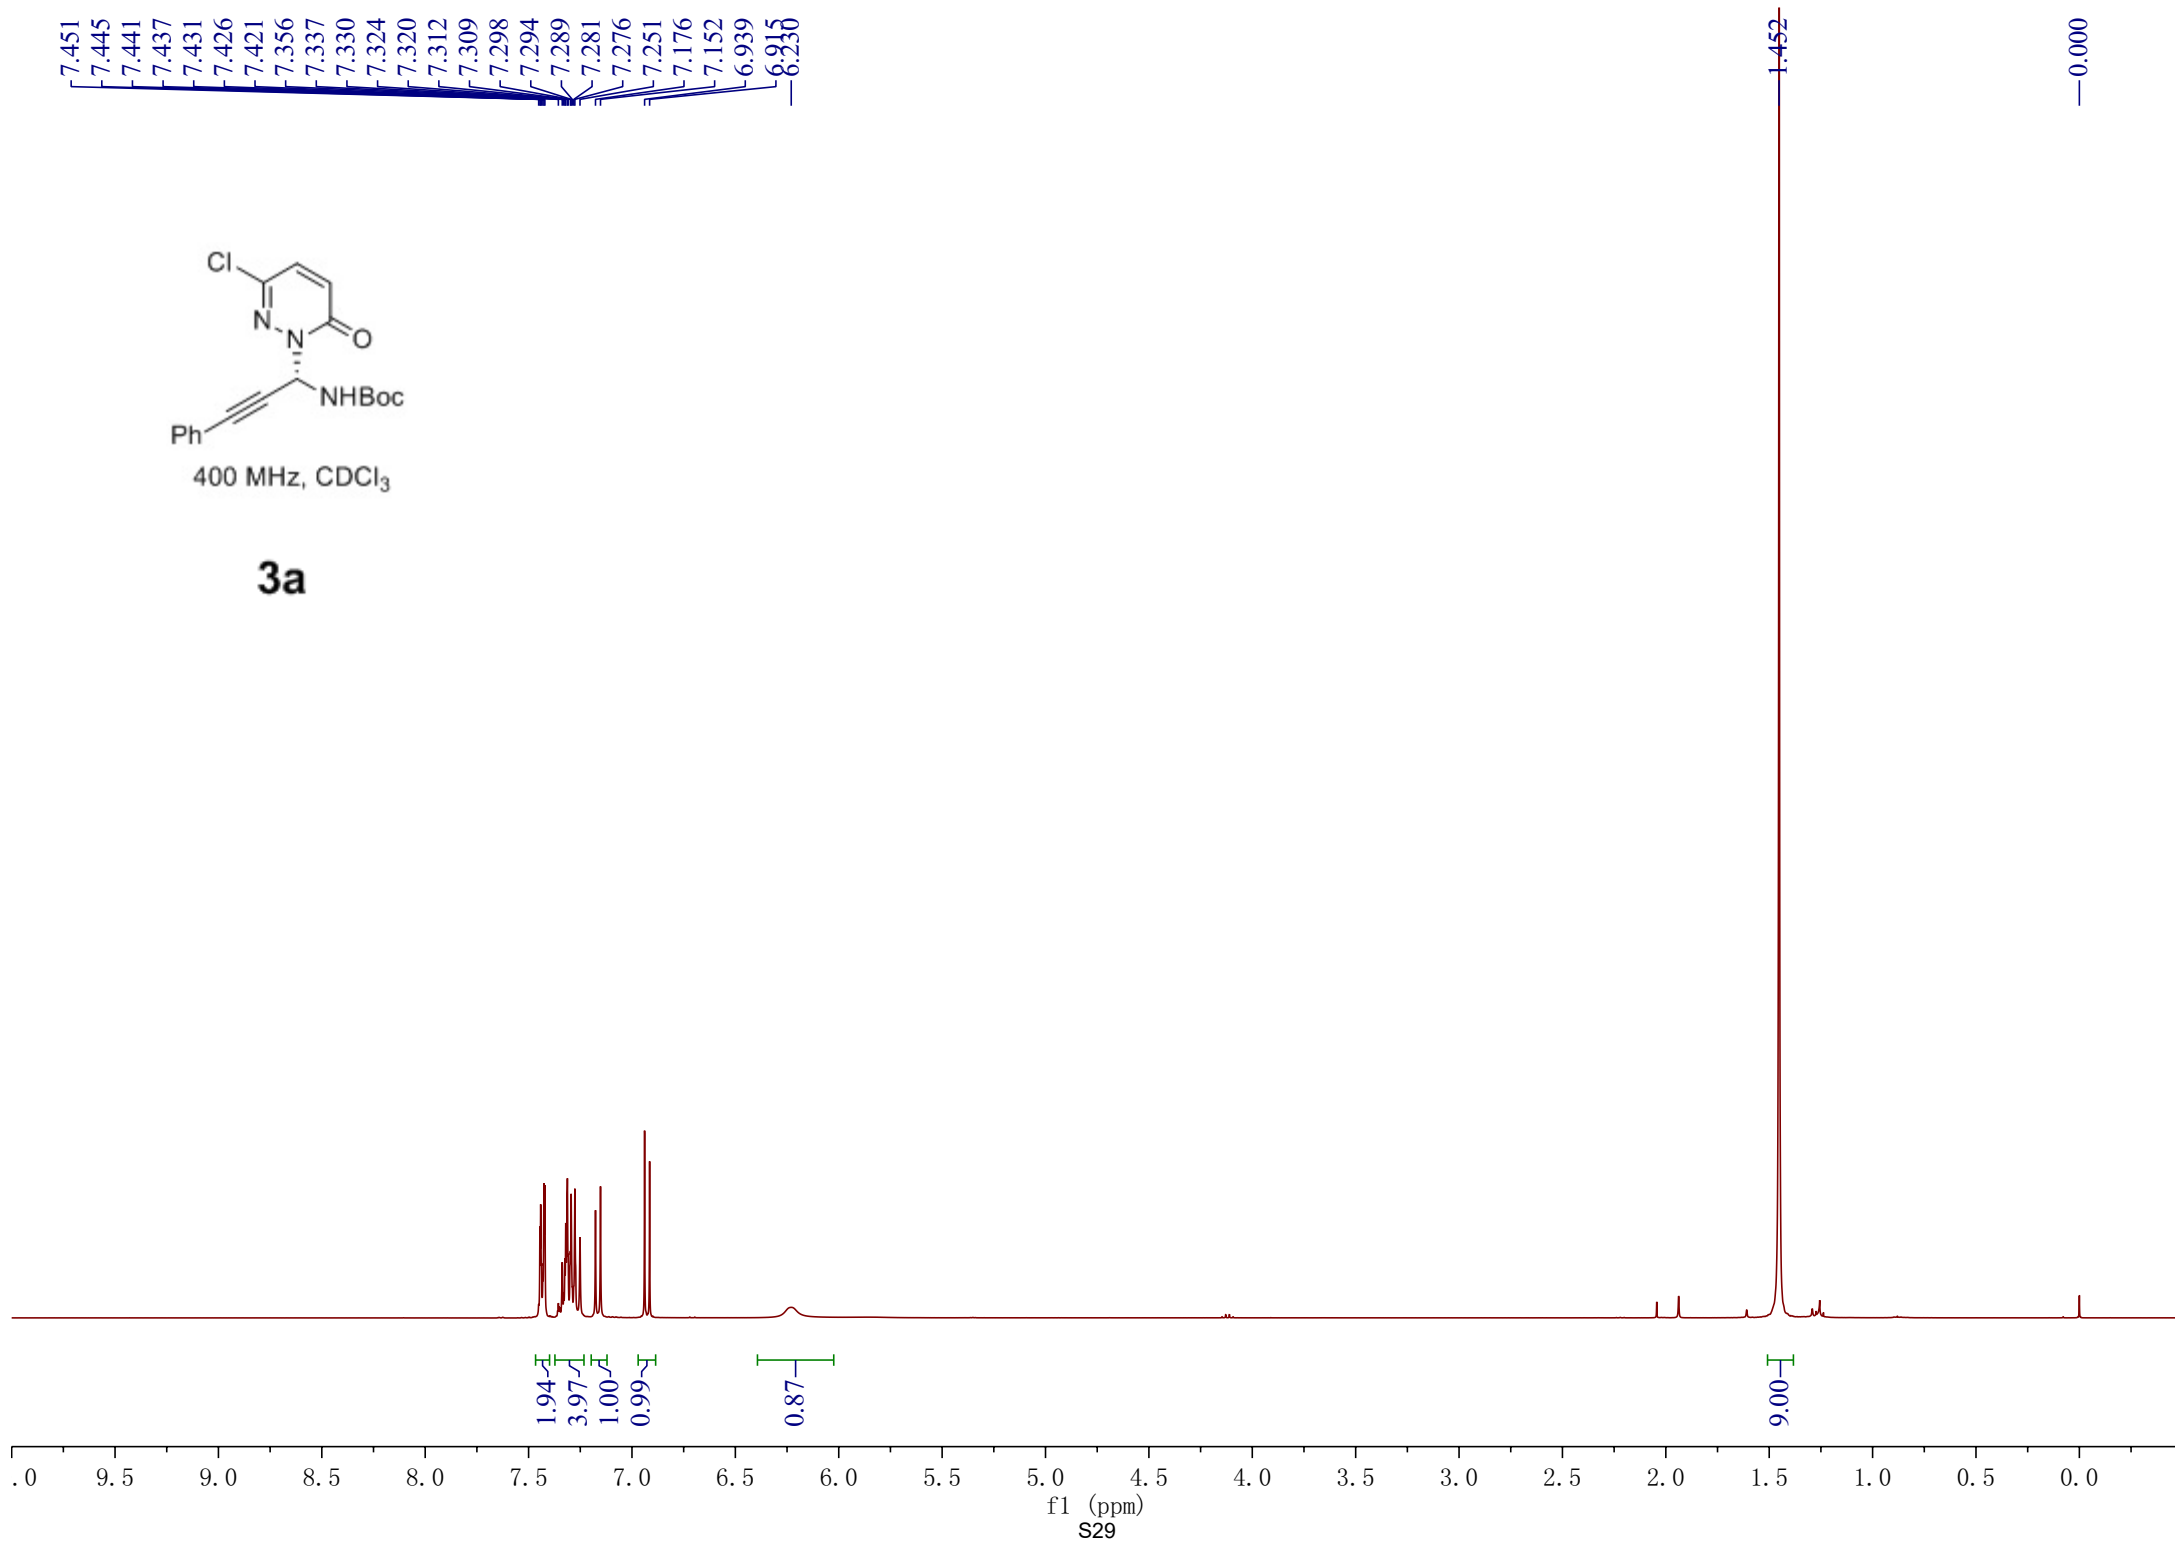

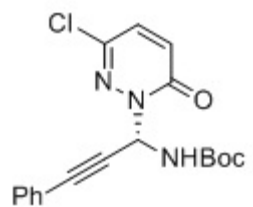

100 MHz, CDCl<sub>3</sub>

**3a**

157.61  
153.50  
138.06  
134.21  
132.76  
132.07  
129.24  
128.40  
121.38

85.10  
82.76  
81.32

59.04

28.30

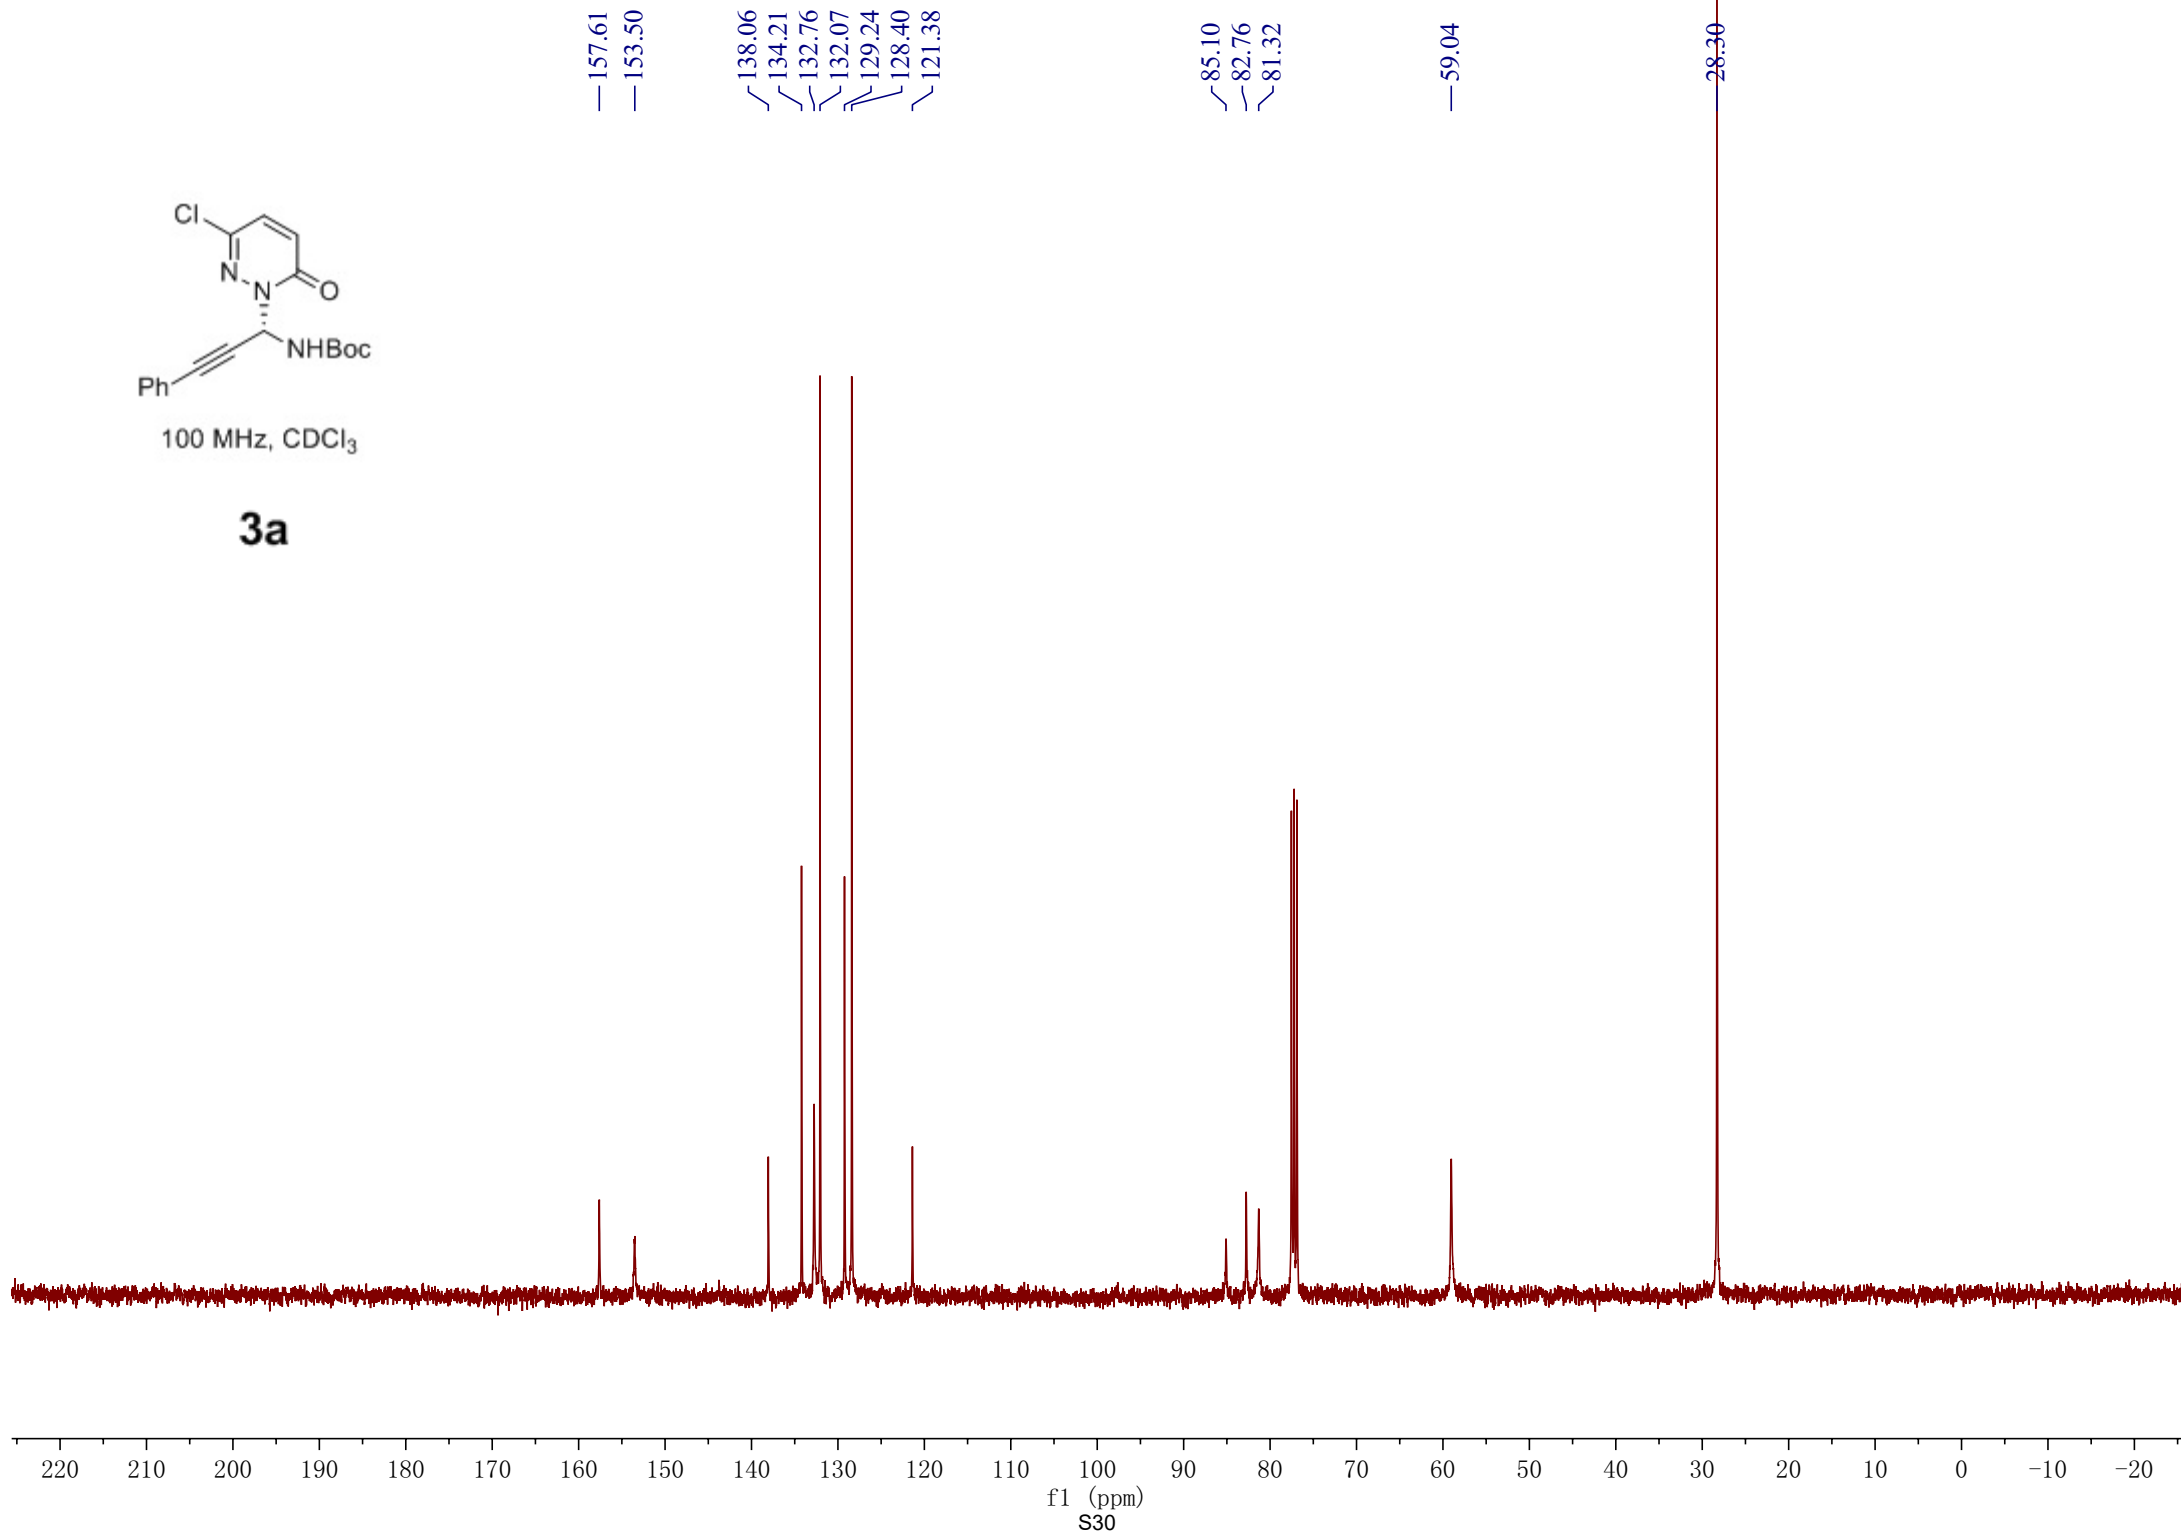



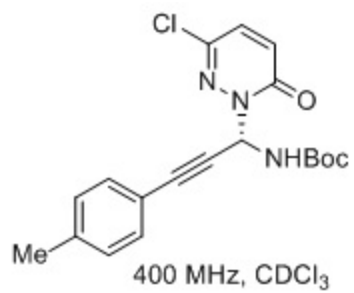

**3b**

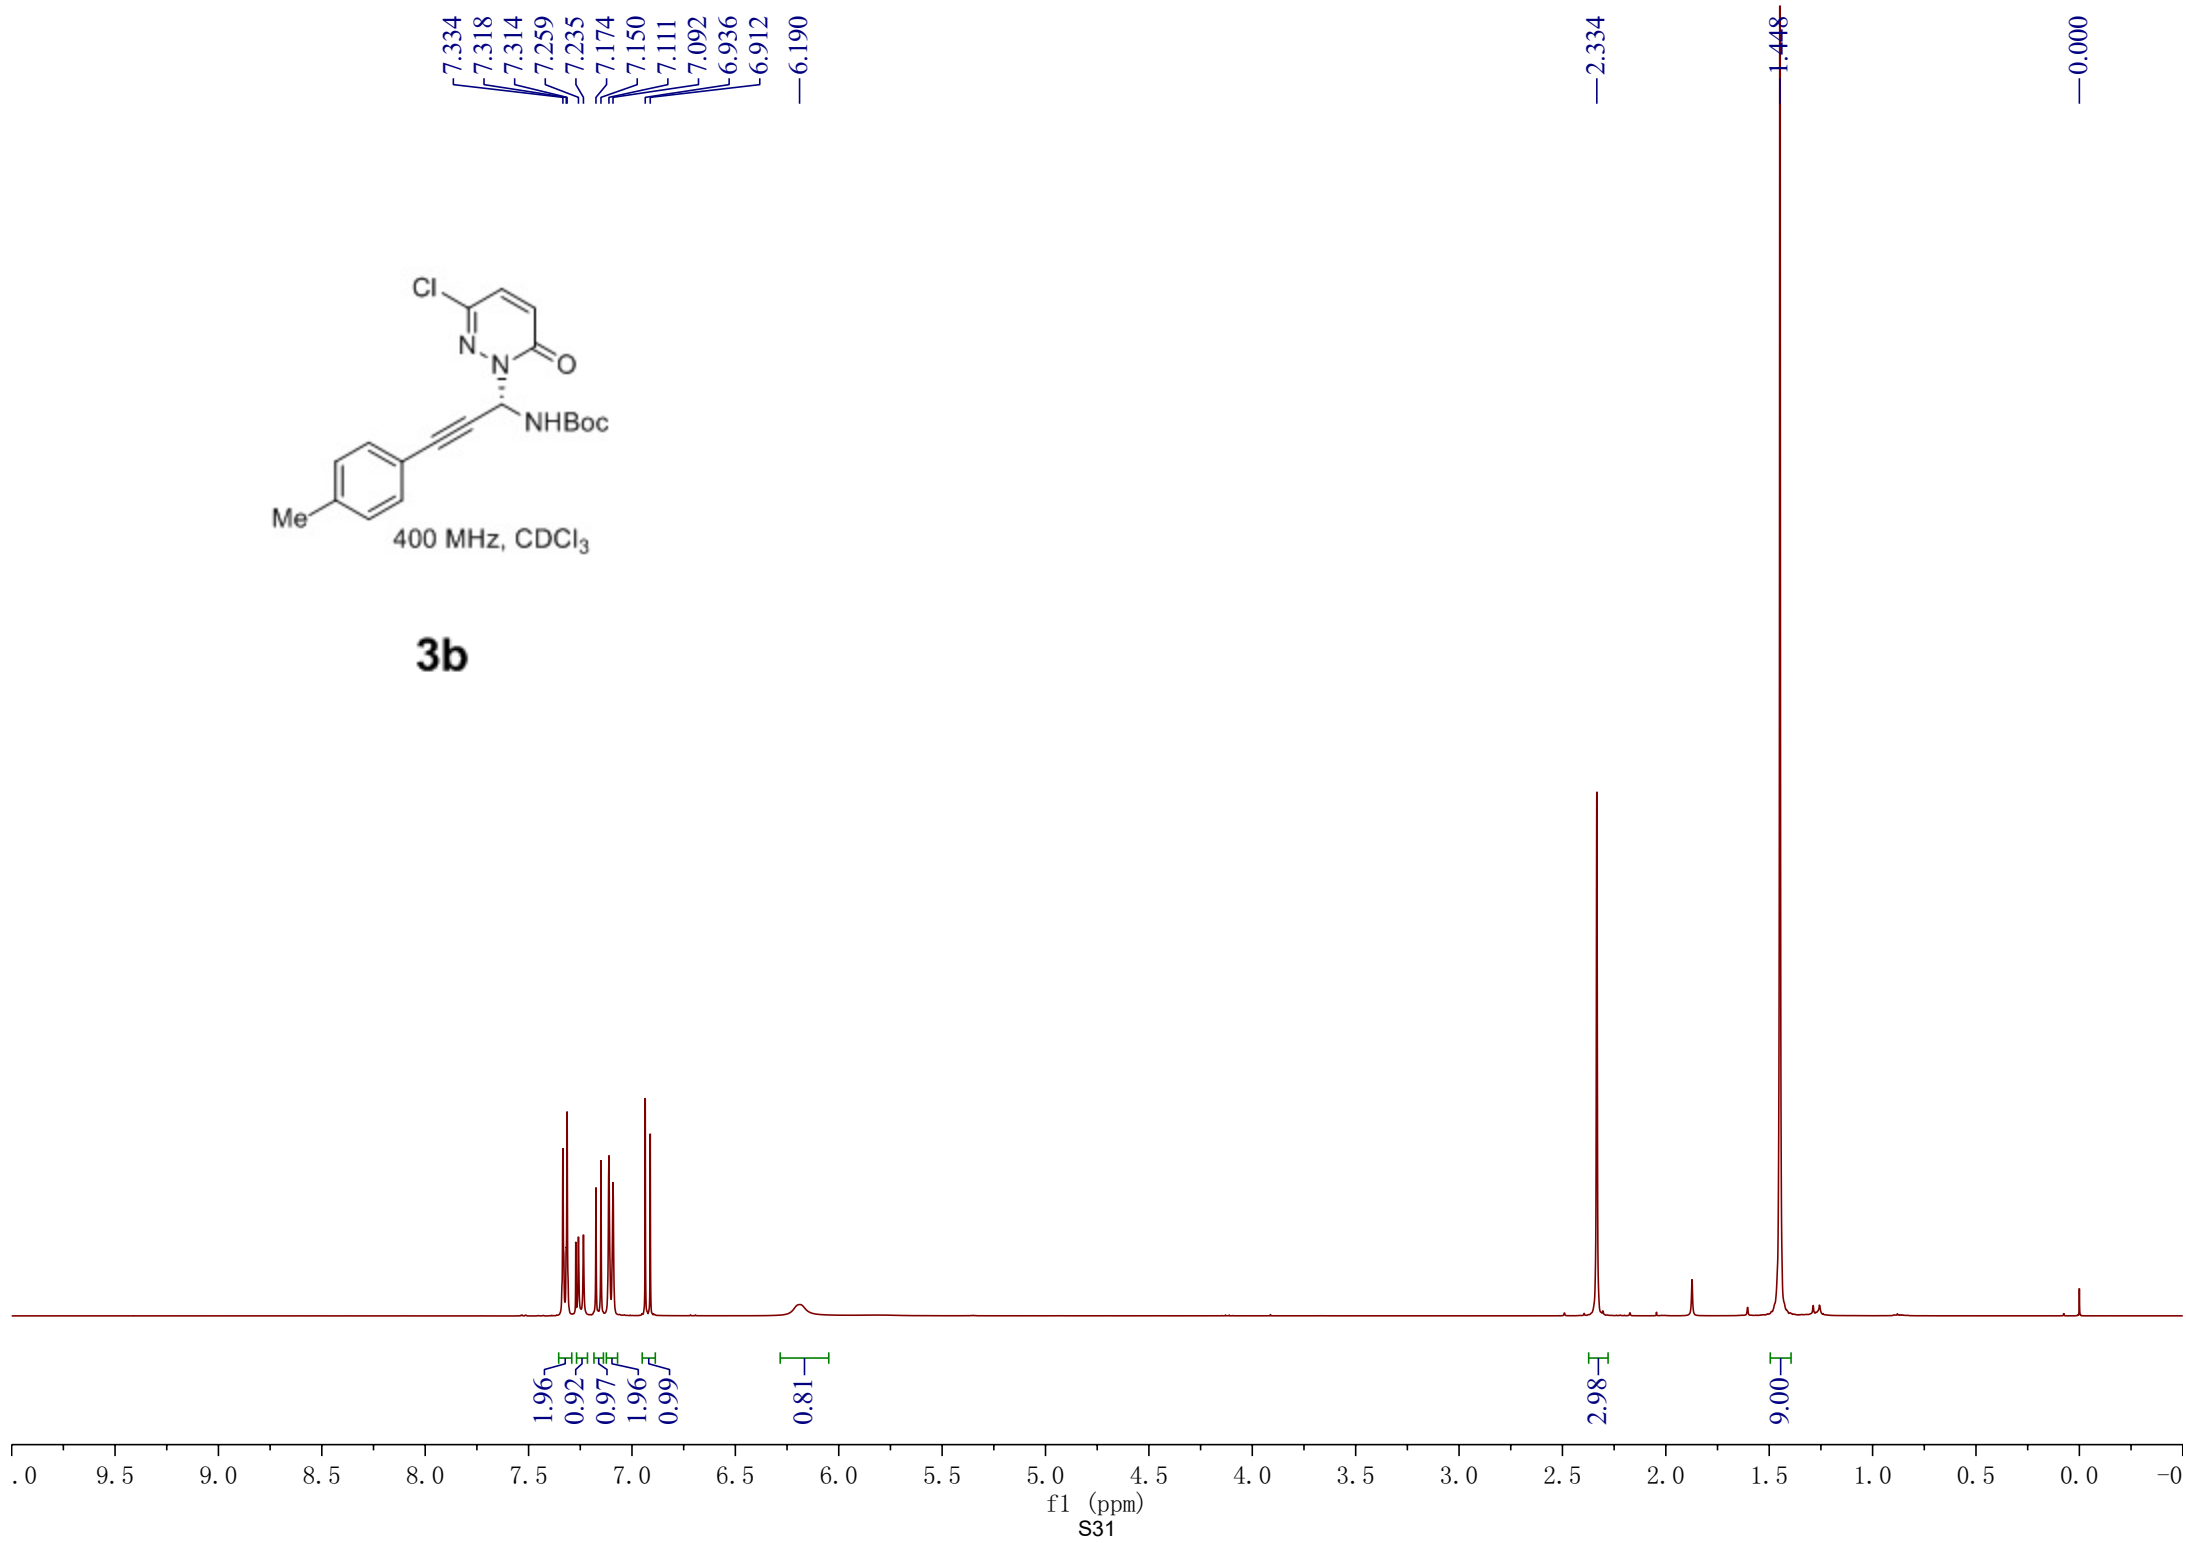

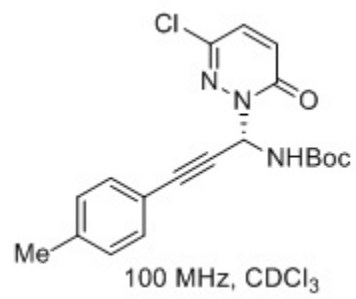

**3b**

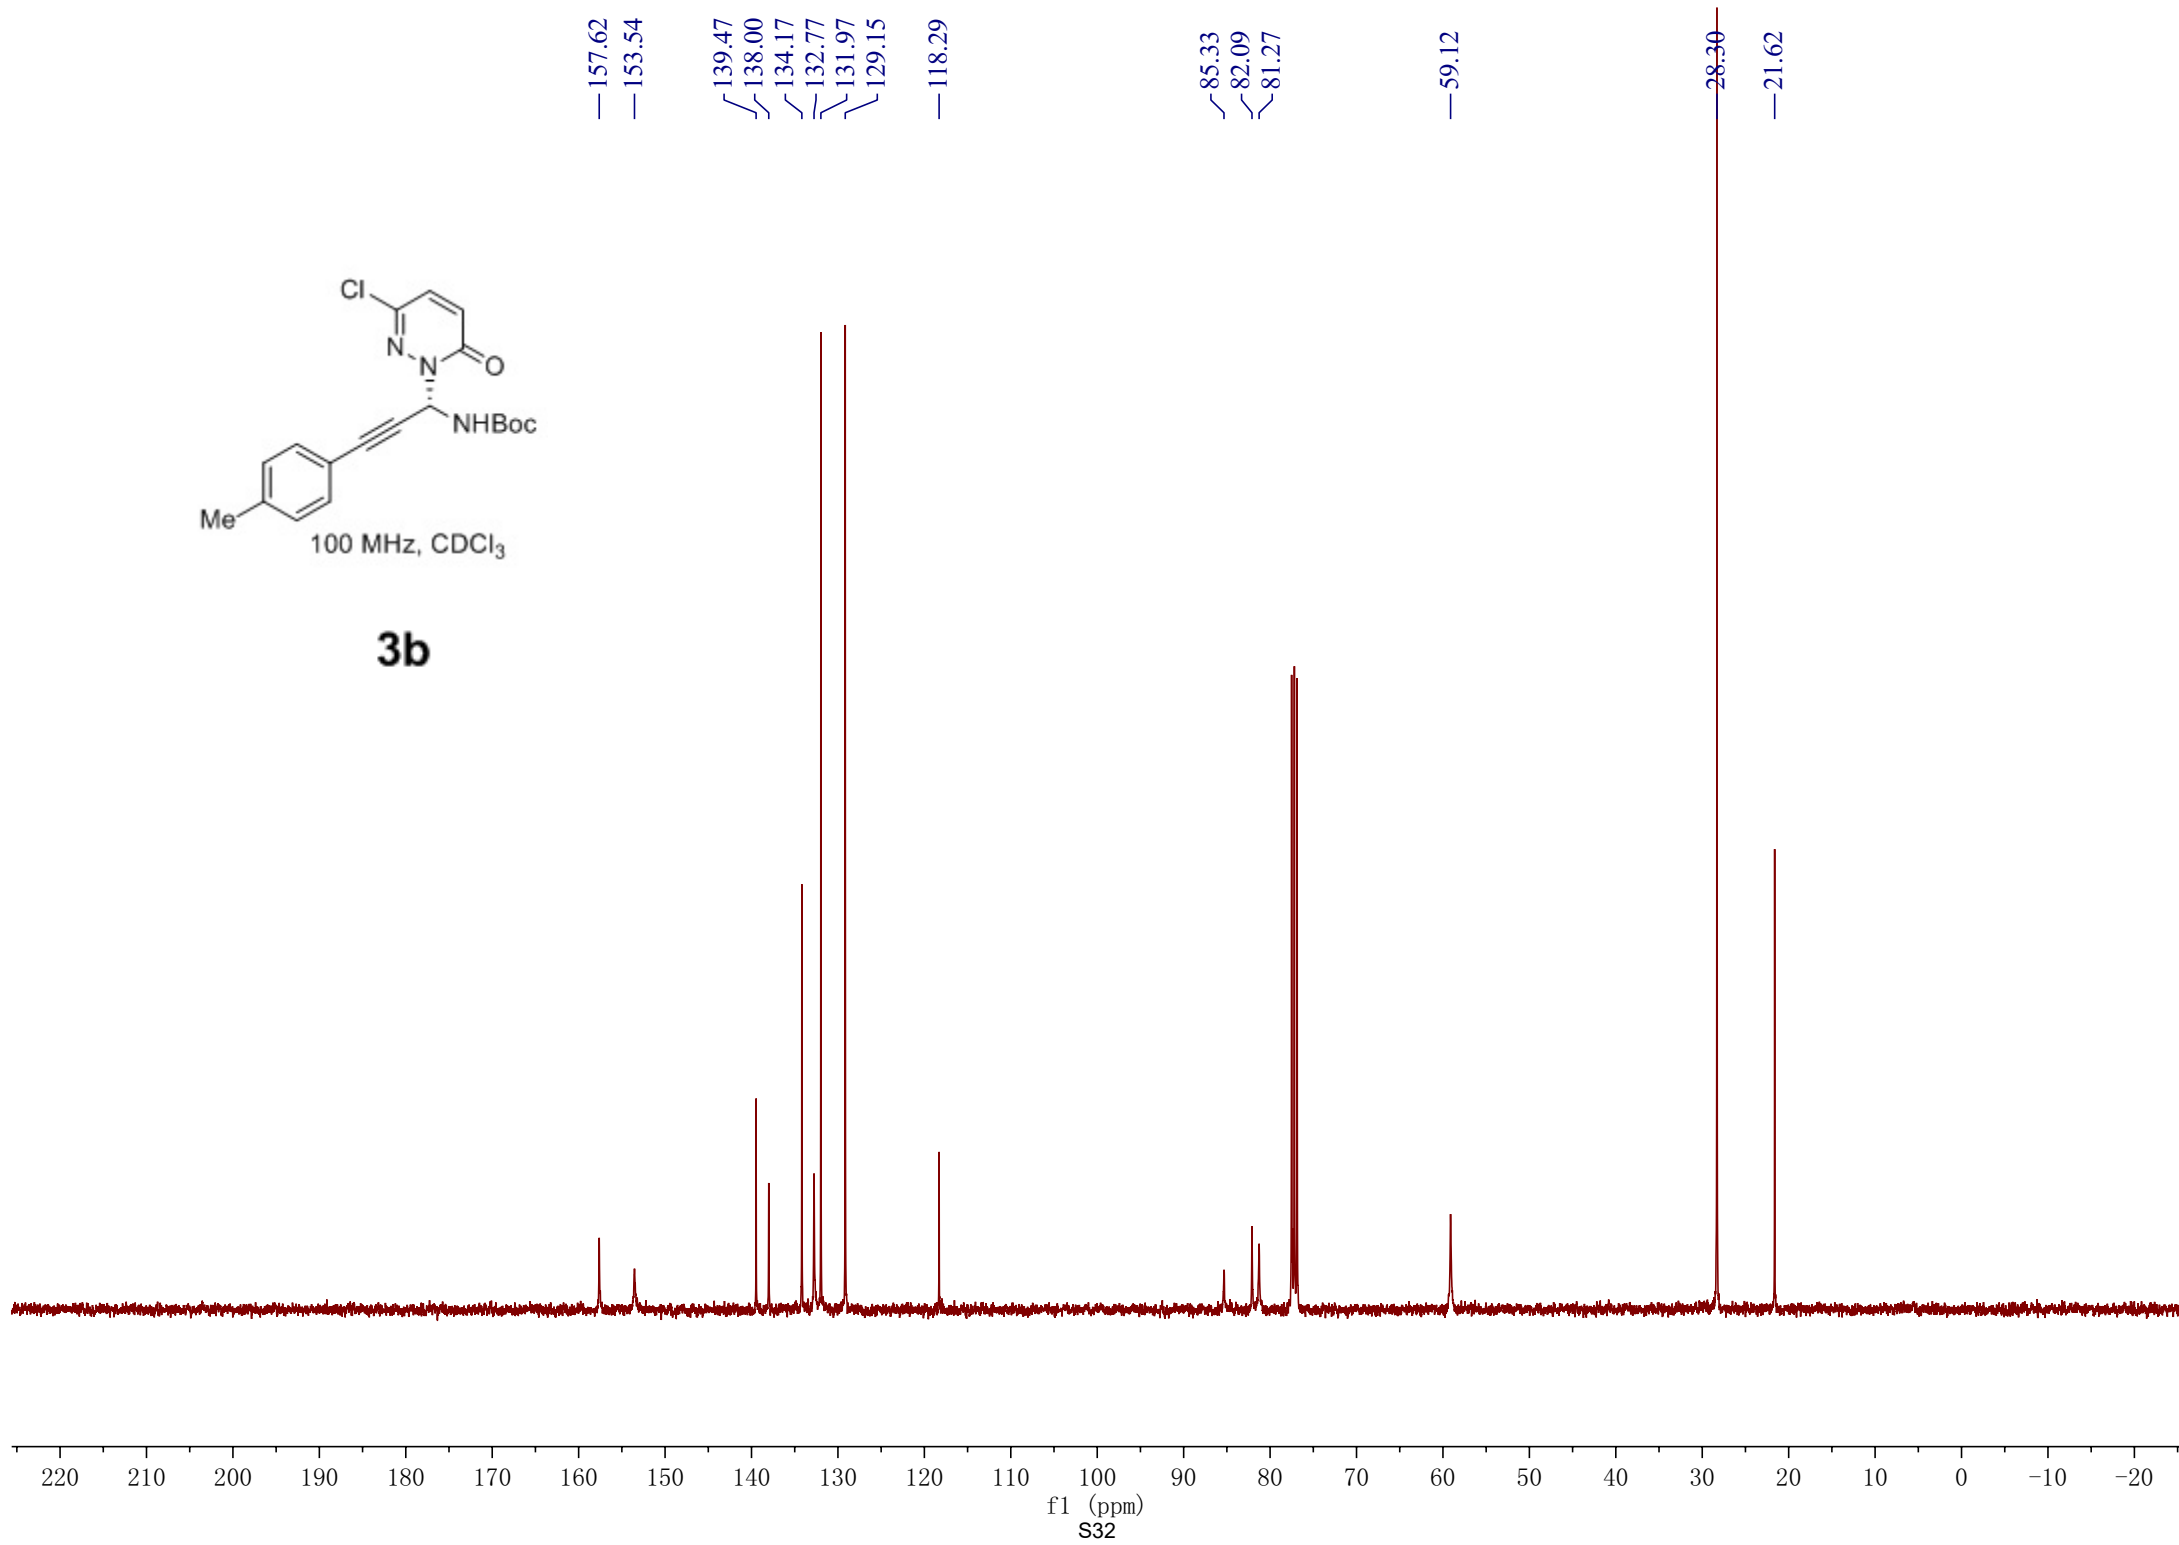

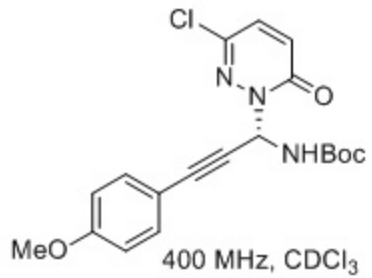

**3c**

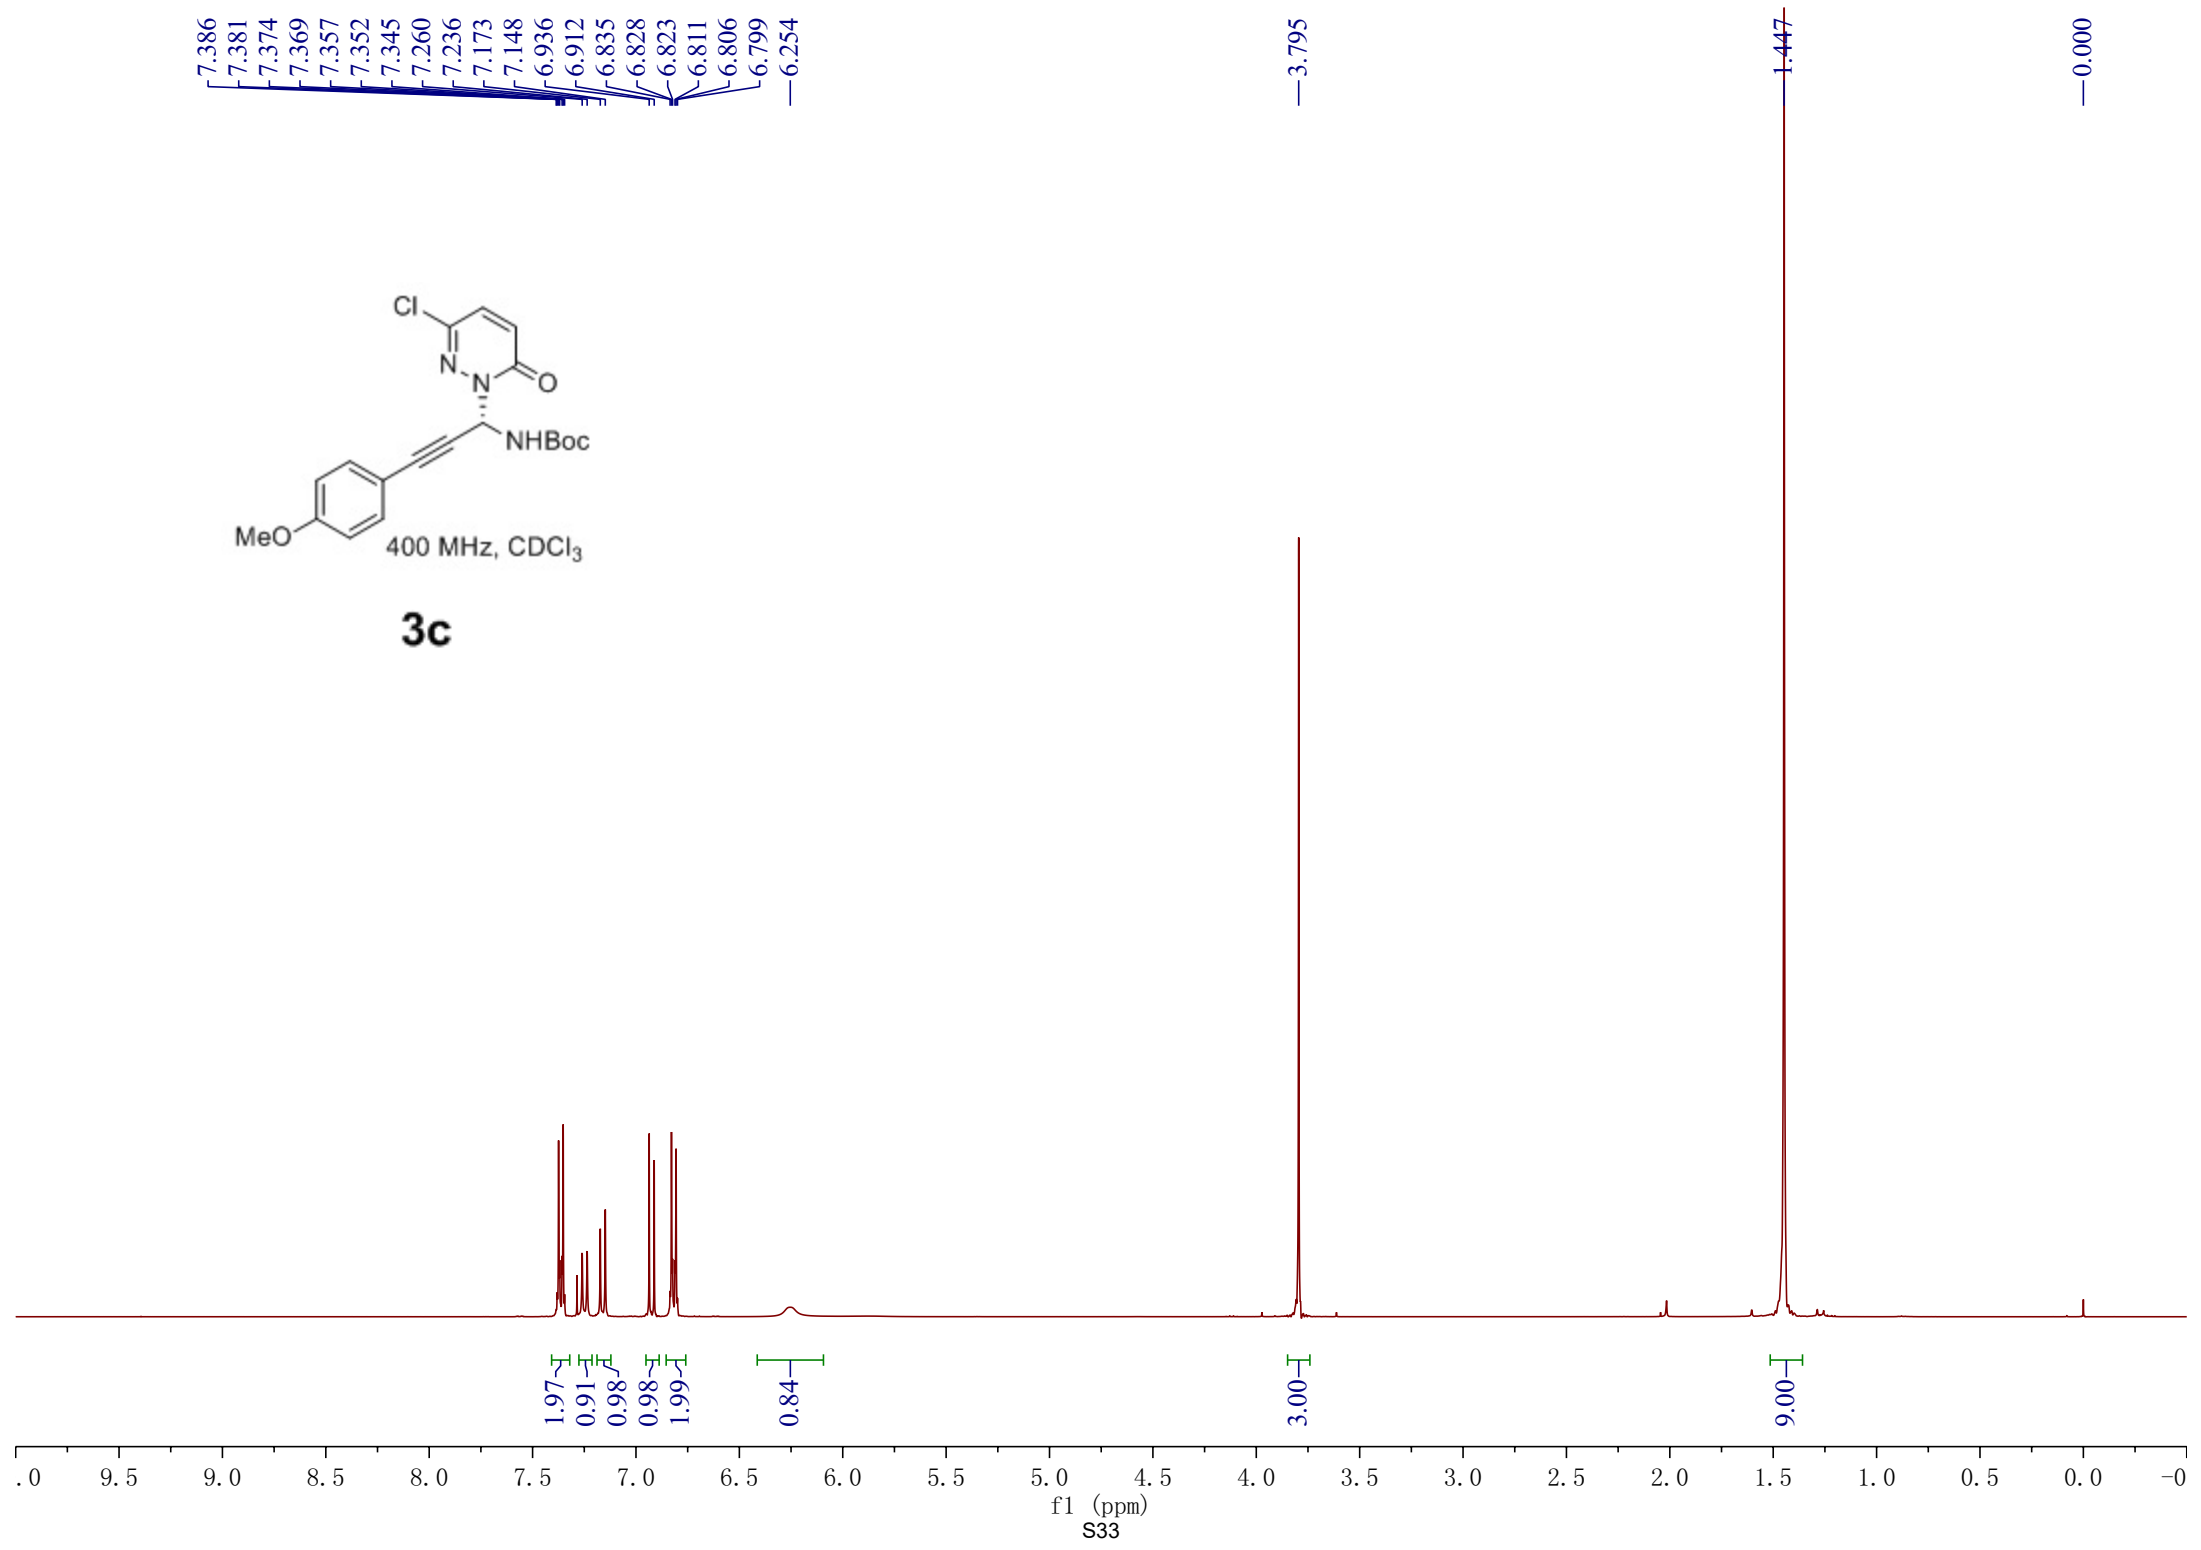

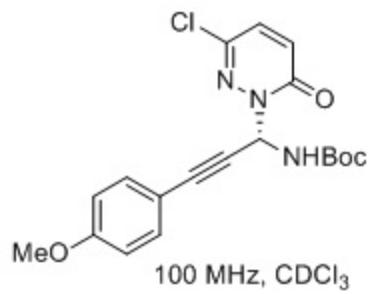

**3c**

160.26  
157.62  
153.57

137.98  
134.16  
133.61  
132.76

114.02  
113.37

85.22  
81.48  
81.23

59.14  
55.37

28.29

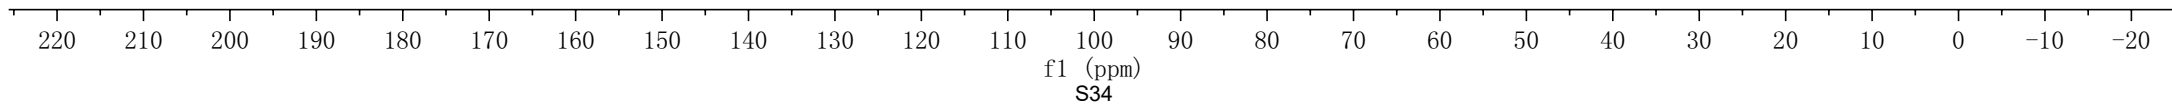

7.451  
7.444  
7.438  
7.430  
7.425  
7.422  
7.414  
7.408  
7.401  
7.250  
7.226  
7.197  
7.173  
7.029  
7.022  
7.017  
7.005  
7.000  
6.996  
6.990  
6.984  
6.979  
6.972  
6.953  
6.929  
— 6.198

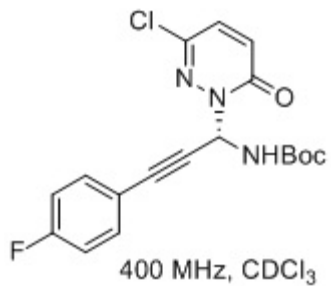

**3d**

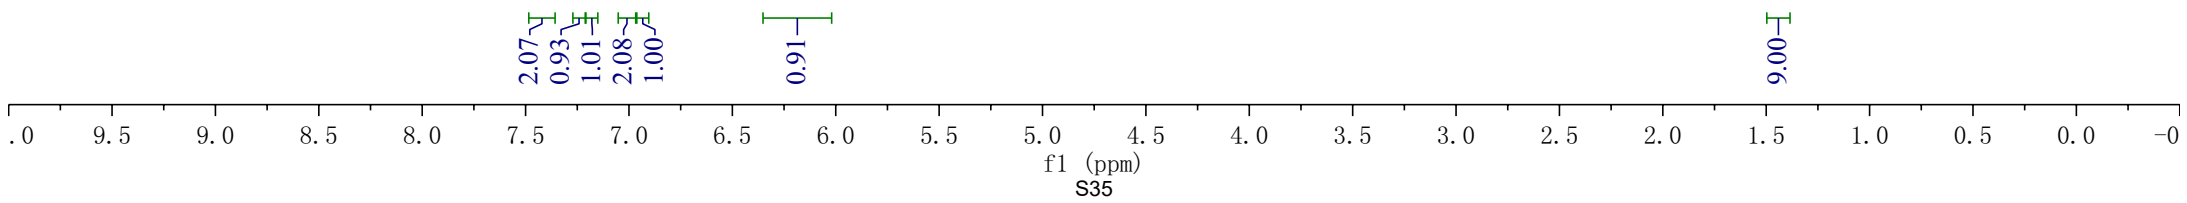

— 0.000

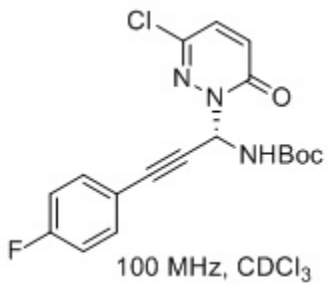

**3d**

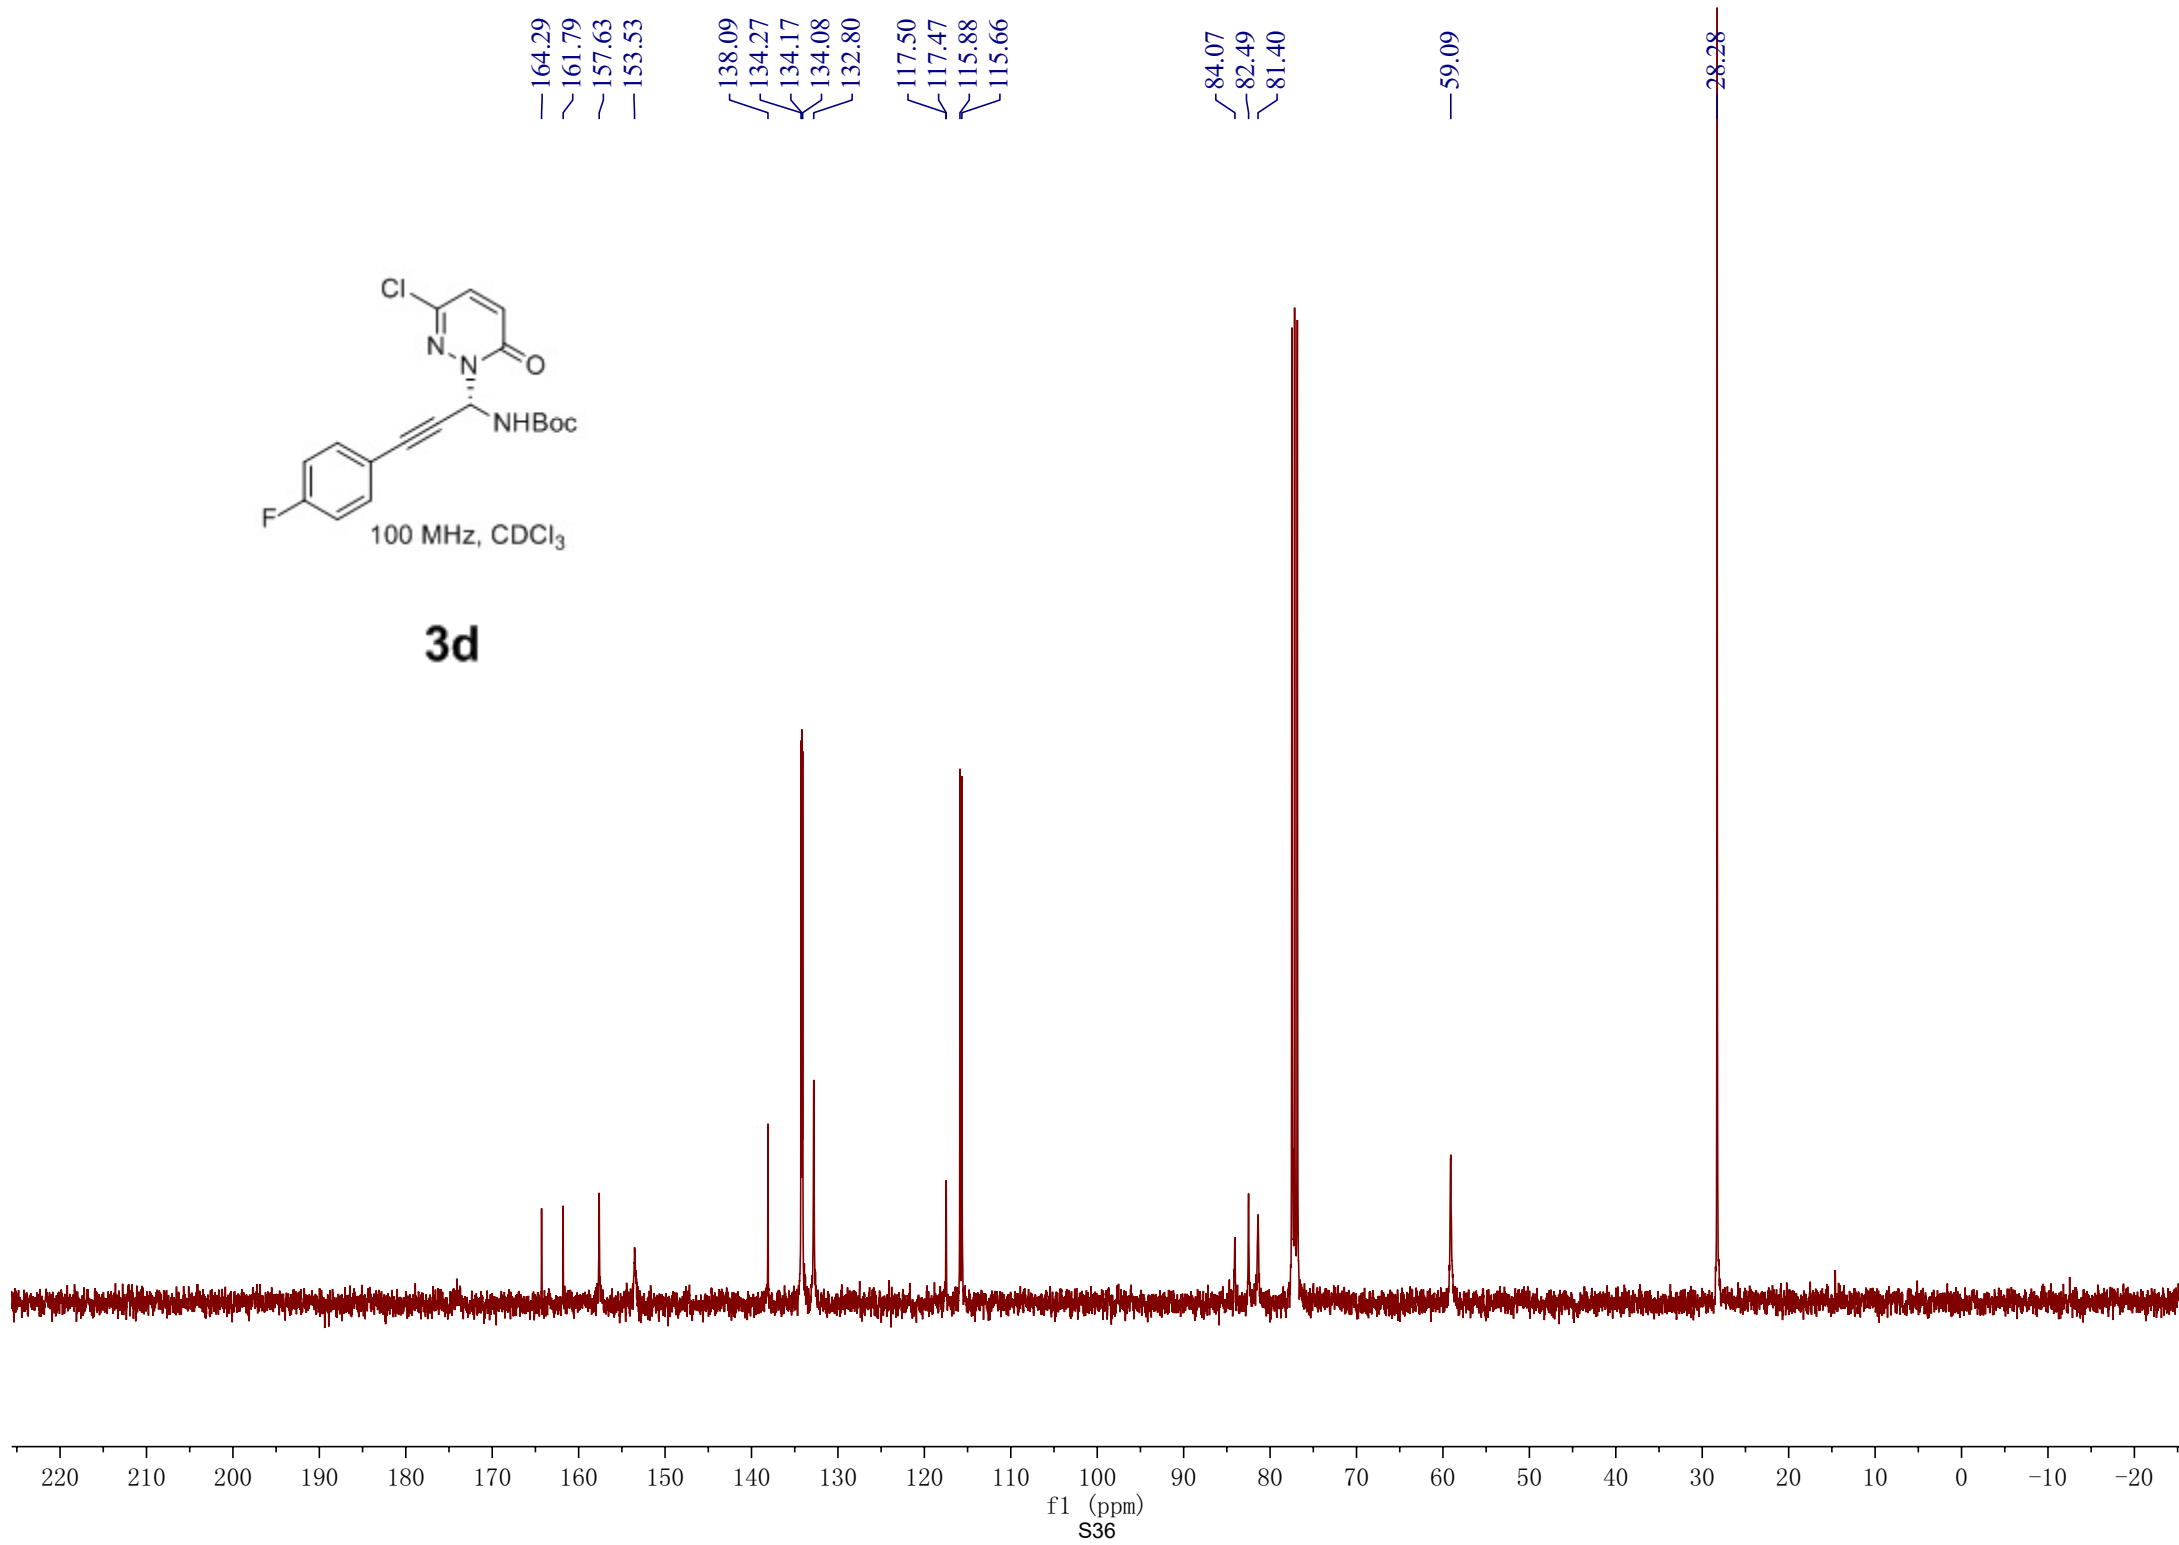

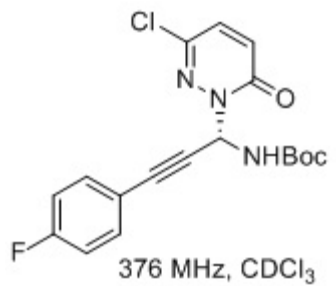

**3d**

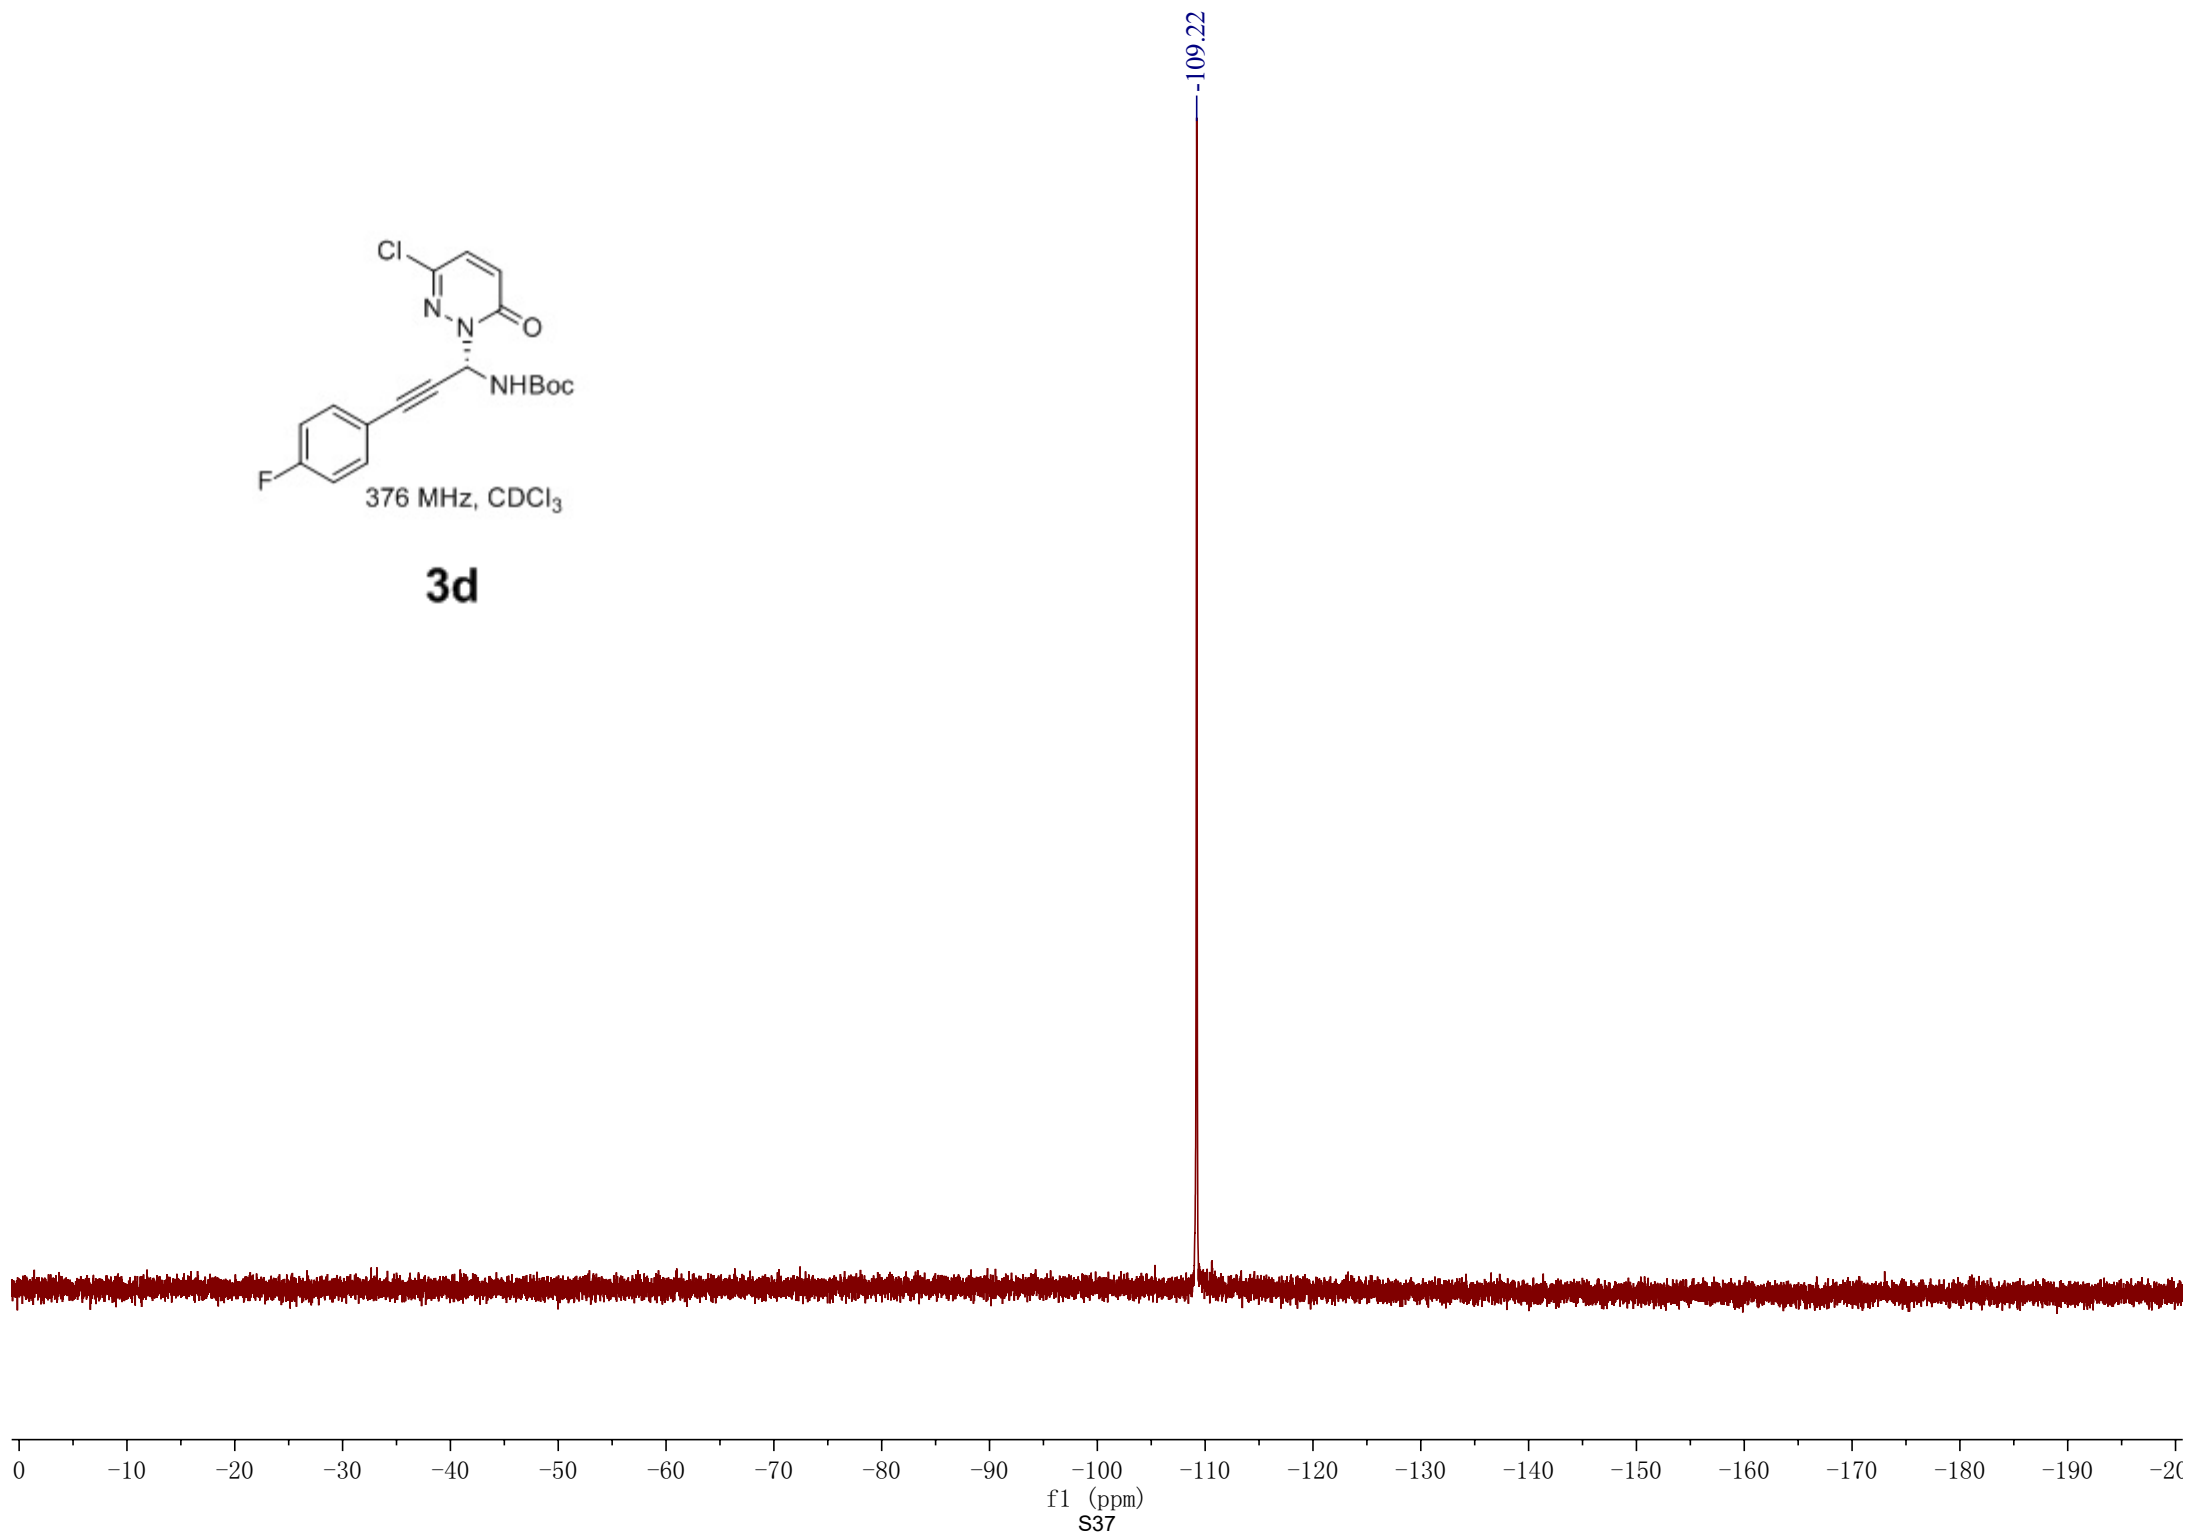

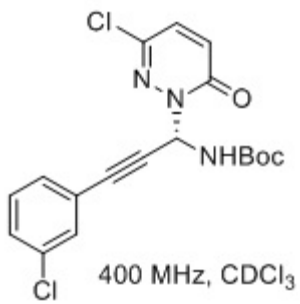

**3e**

7.438  
7.434  
7.430  
7.335  
7.332  
7.329  
7.327  
7.313  
7.311  
7.308  
7.257  
7.242  
7.236  
7.218  
7.198  
7.174  
6.948  
6.924  
— 6.136

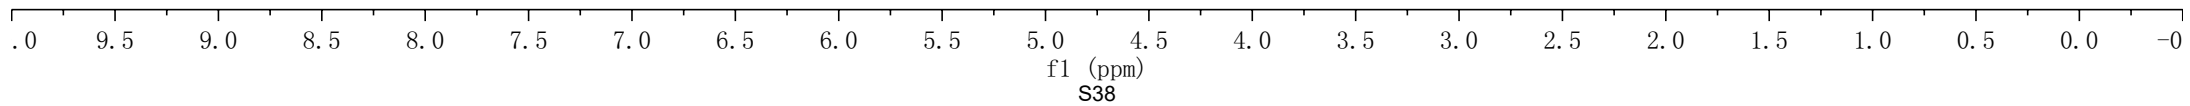

1.454

— 0.000



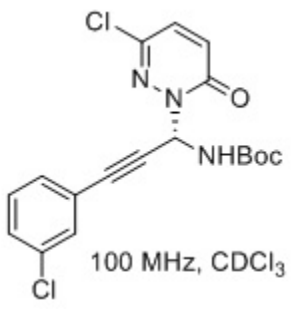

**3e**

— 157.55  
— 153.38  
138.11  
134.28  
134.20  
132.75  
131.90  
130.16  
129.62  
129.50  
123.02

83.79  
83.56  
81.43

— 59.02

— 28.23

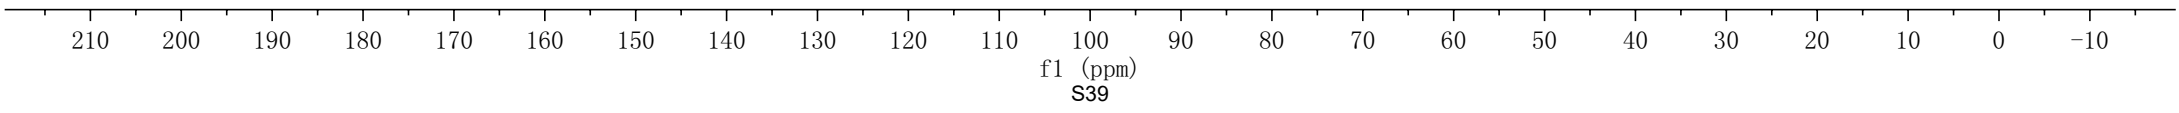

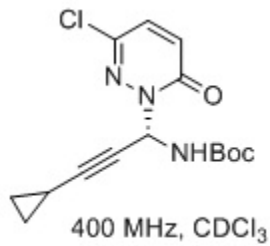

**3f**

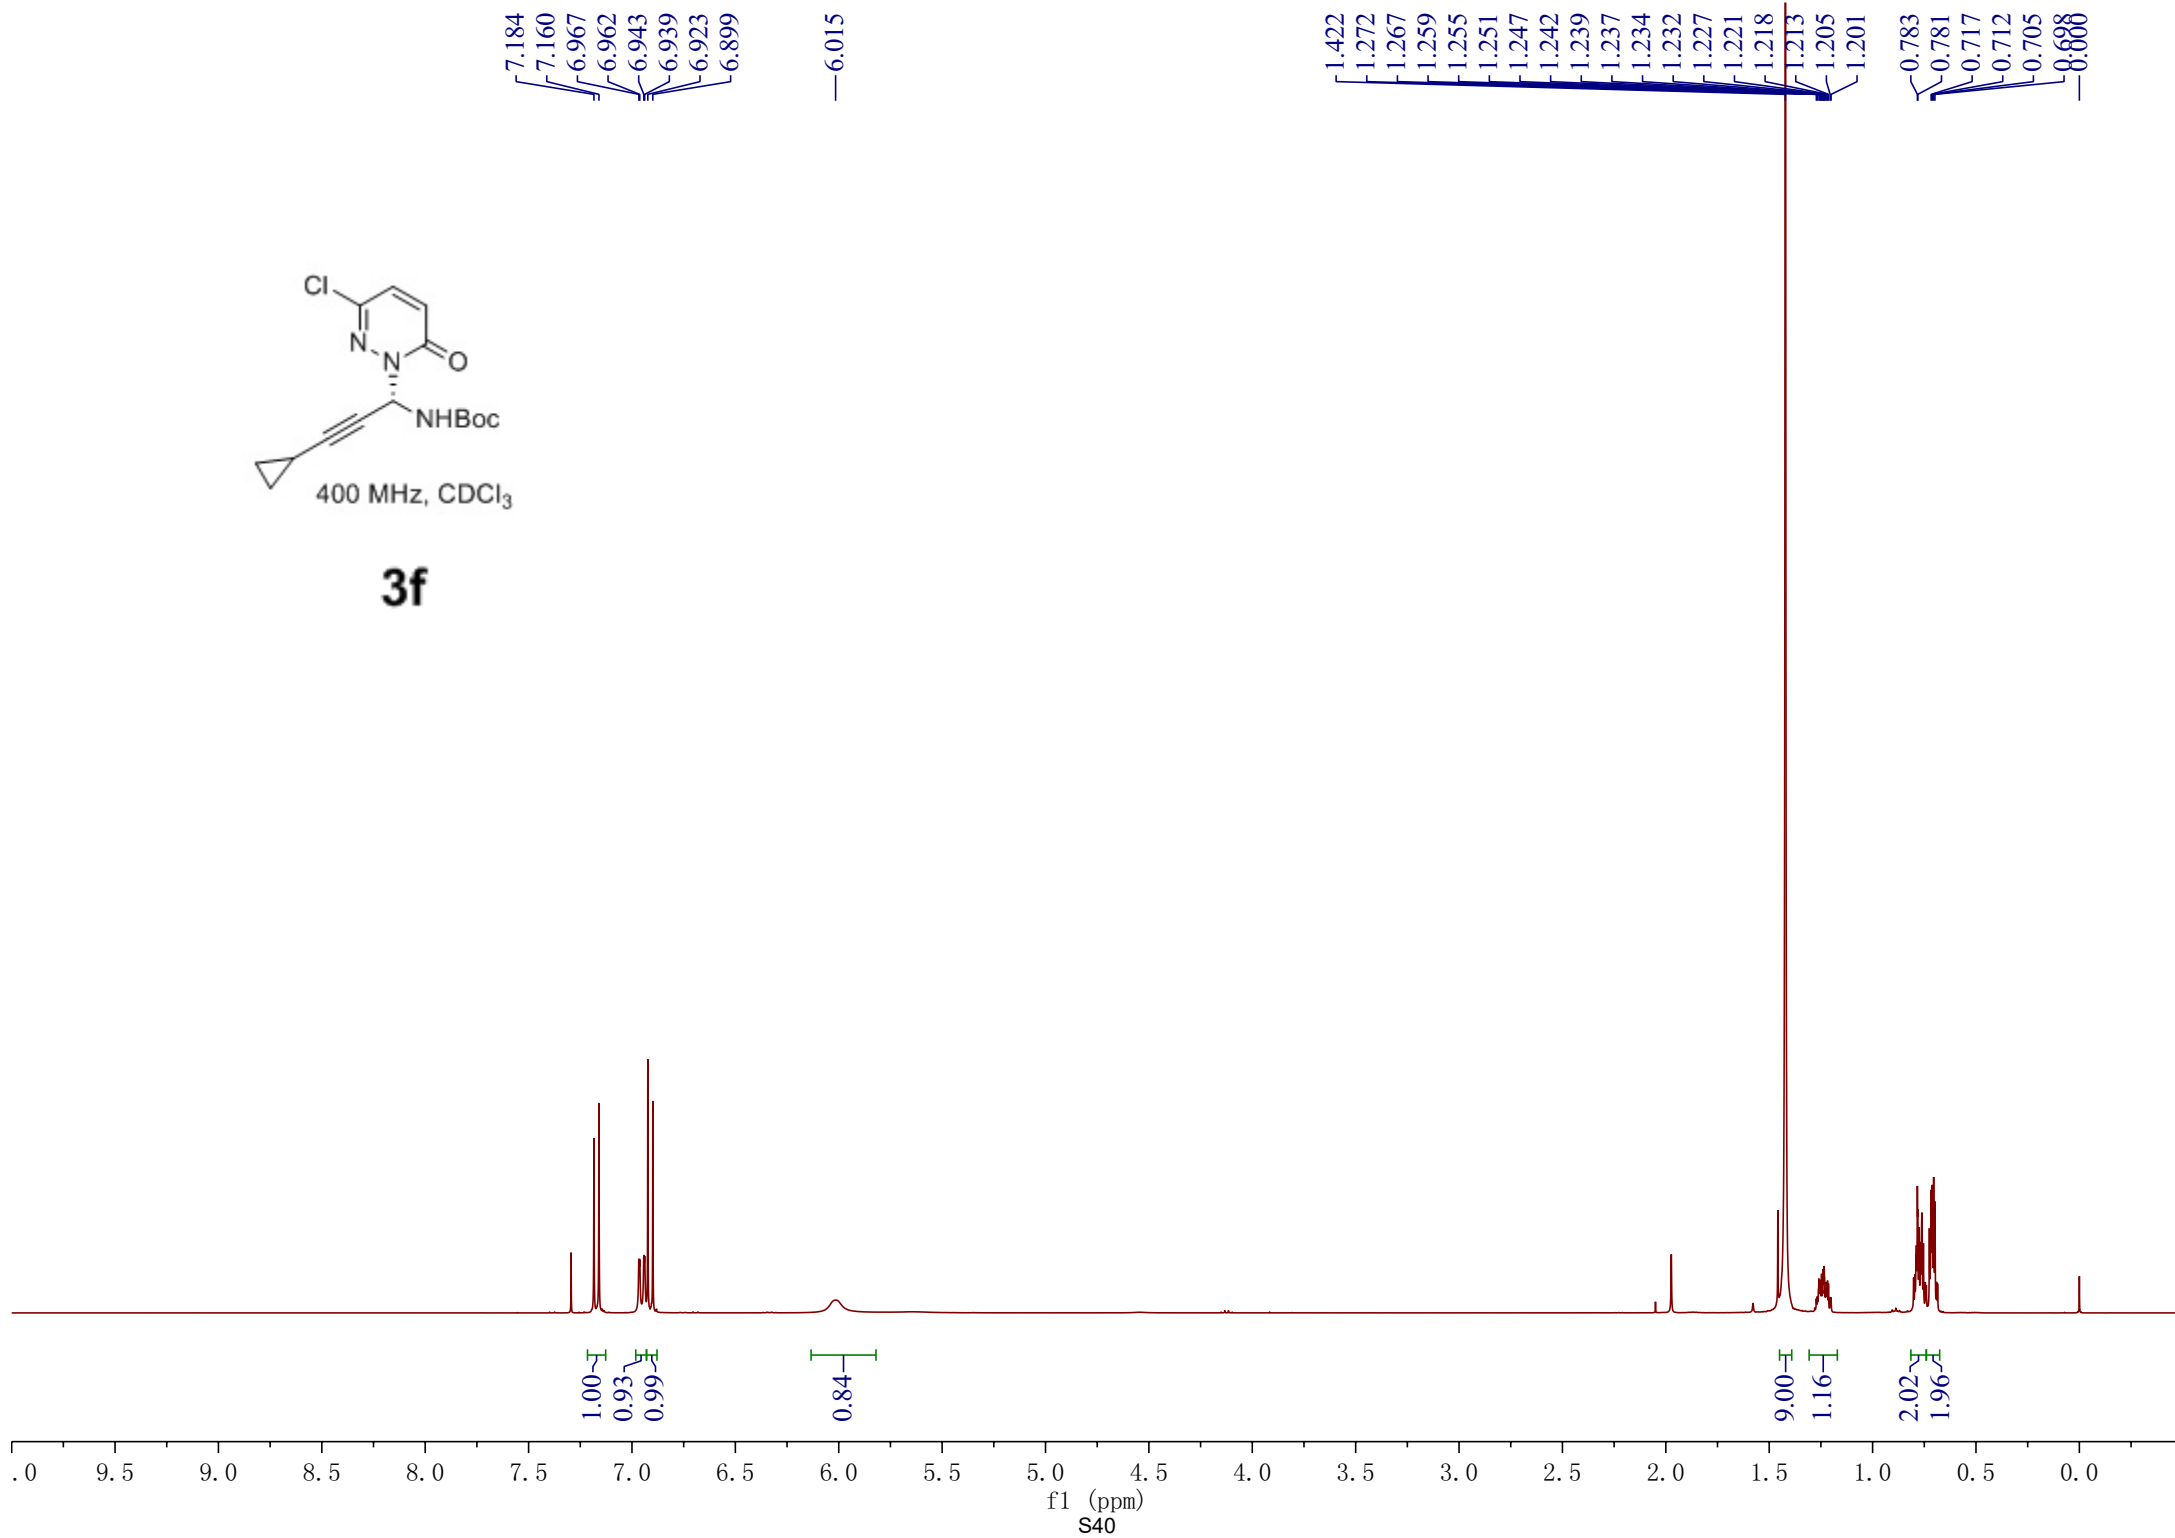

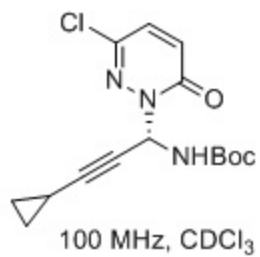

**3f**

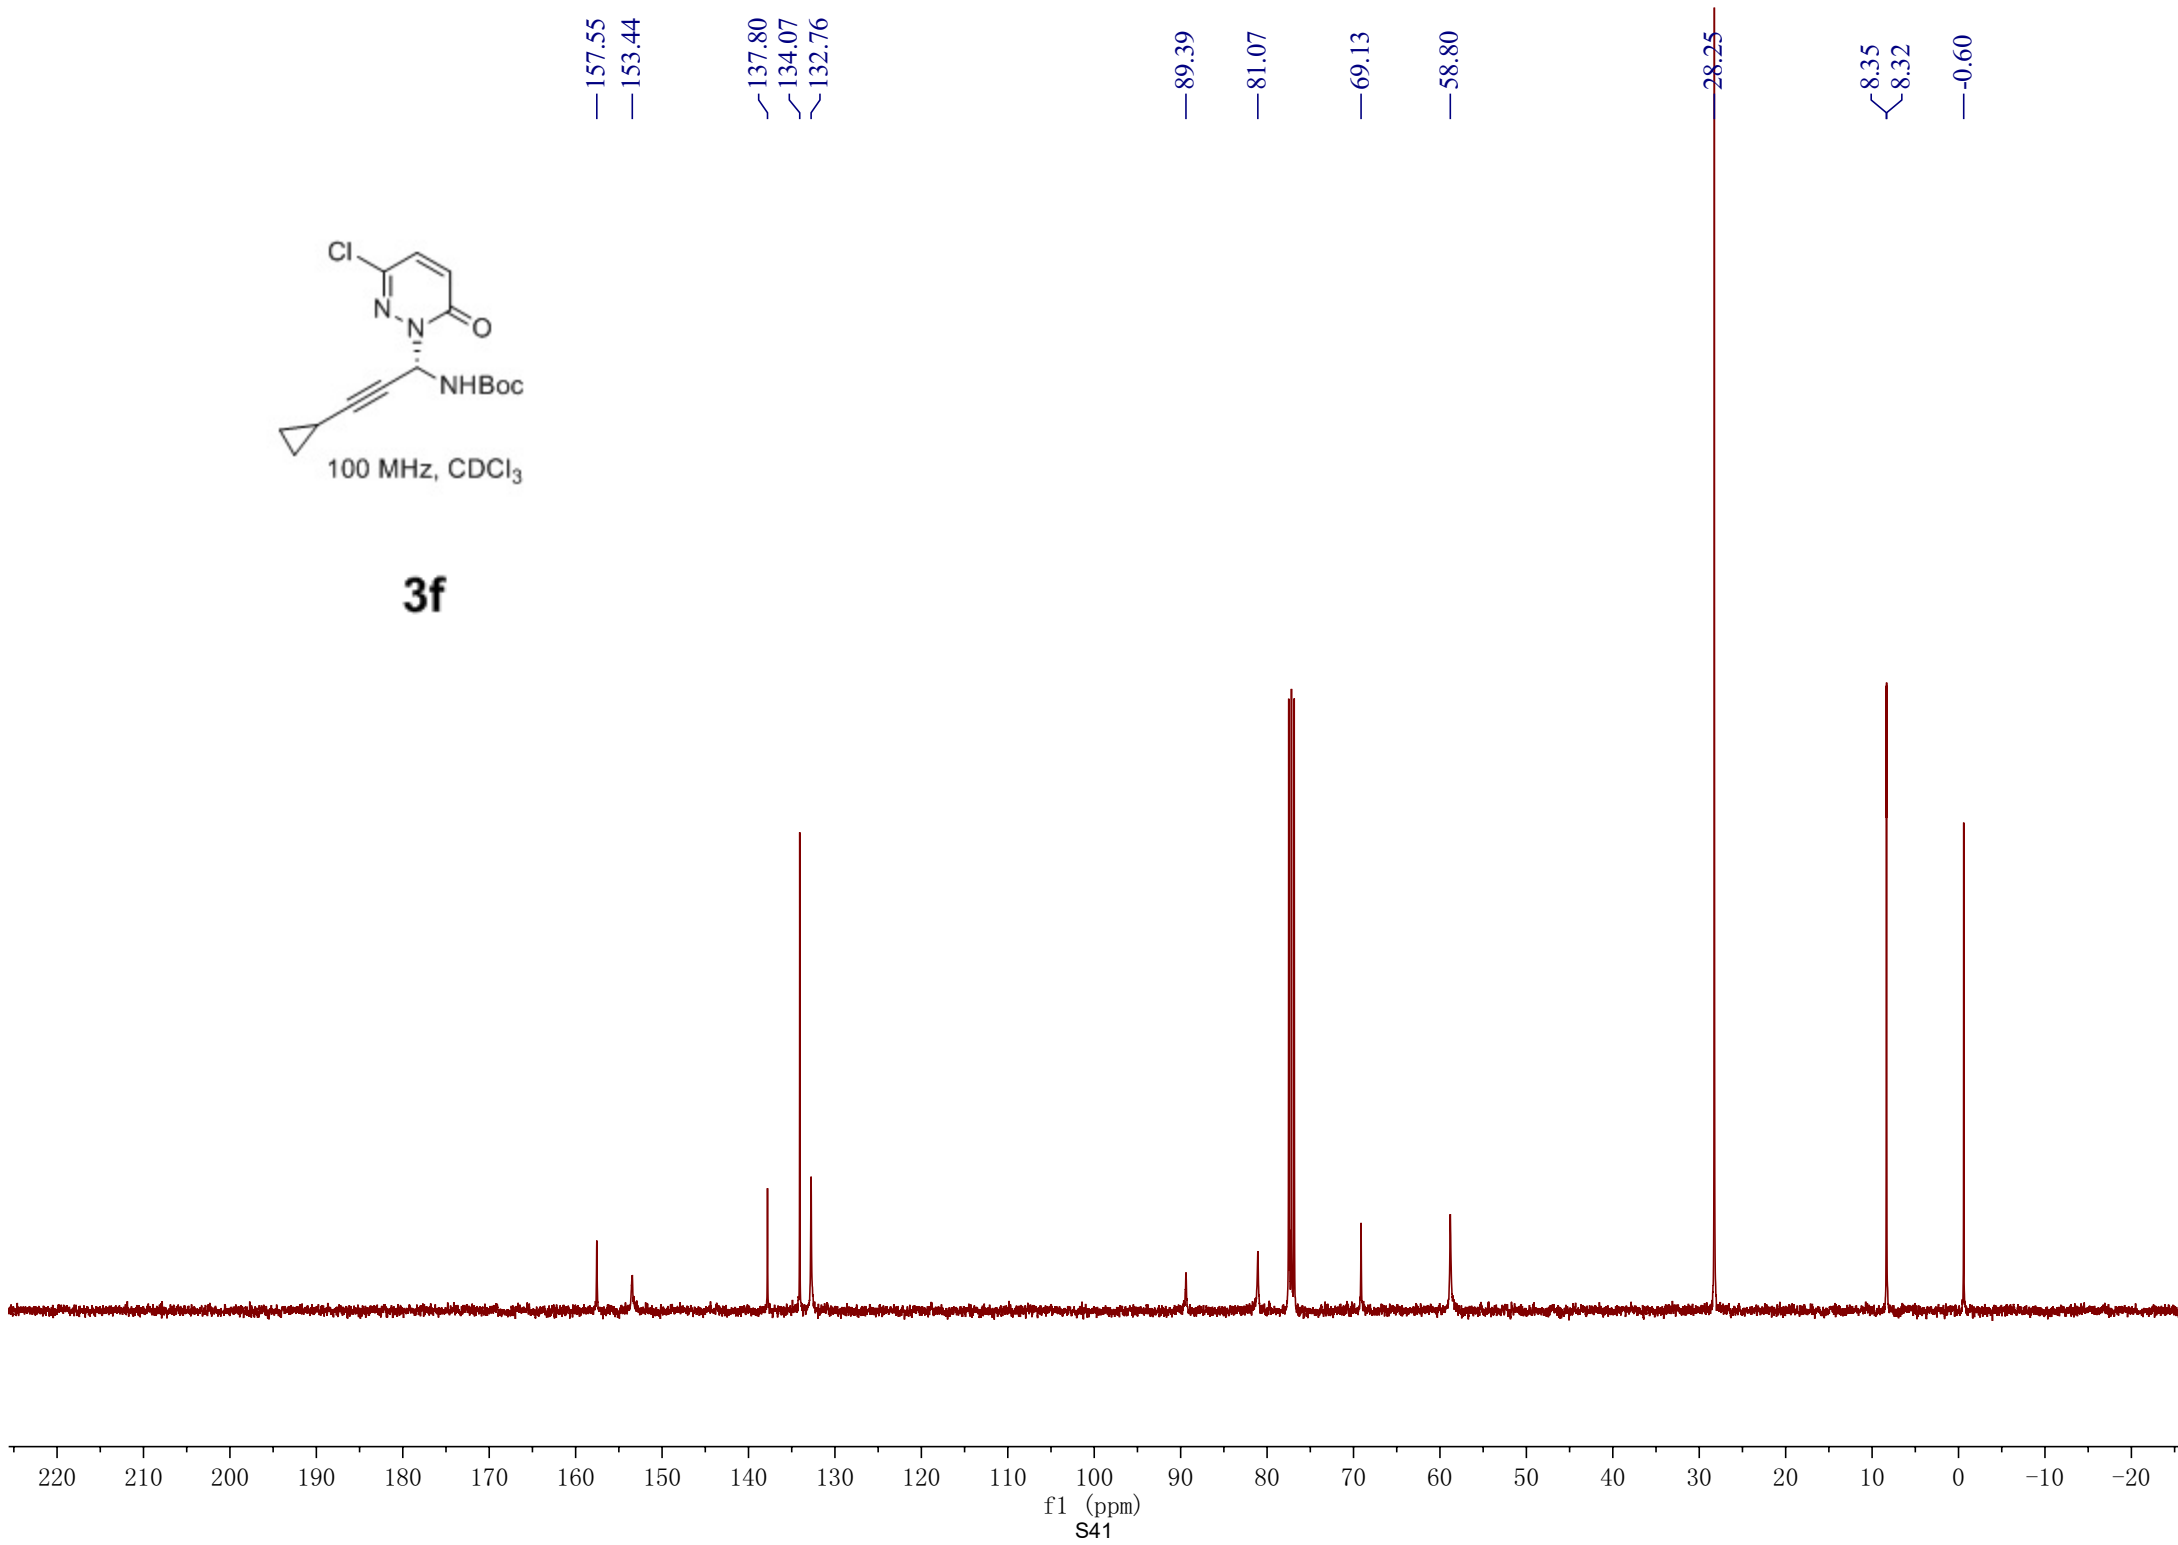

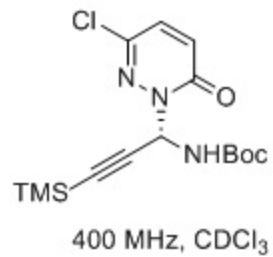

**3g**

7.189  
7.165  
7.023  
6.998  
6.930  
6.906

6.043

1.431

0.164

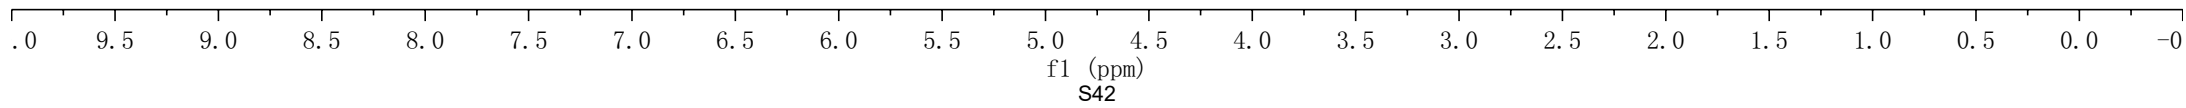

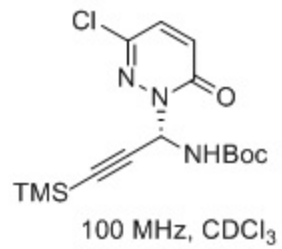

**3g**

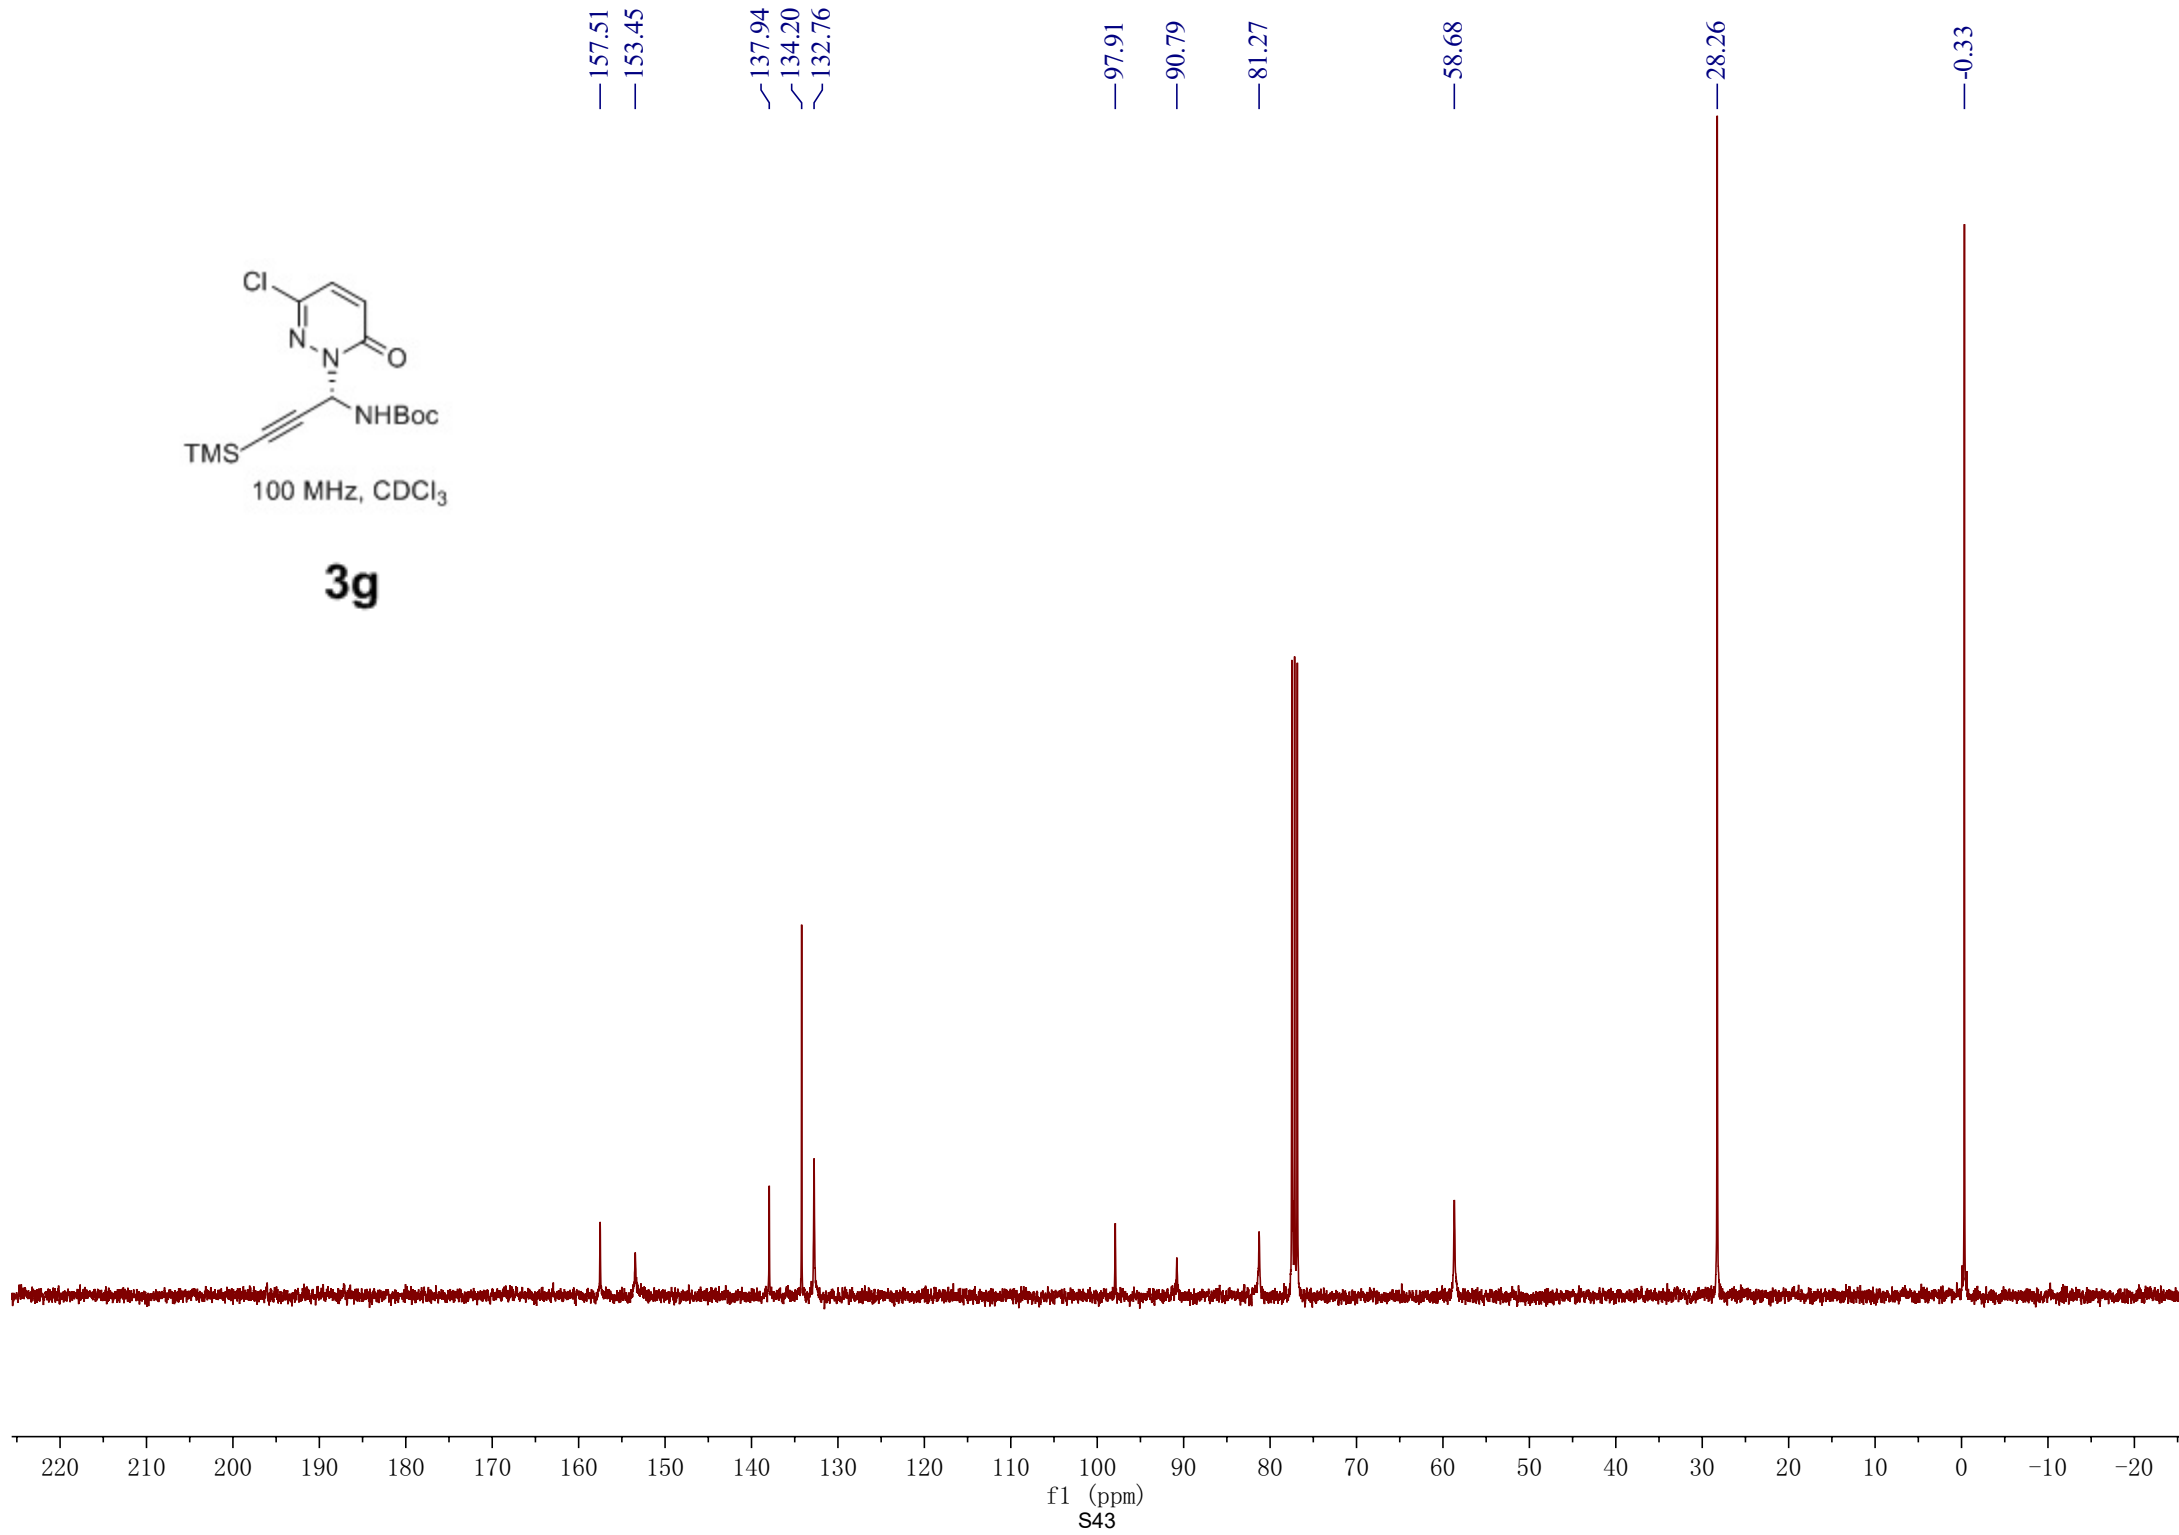

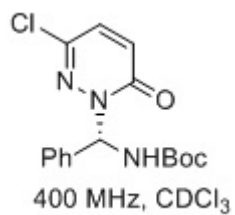

**3h**

7.447  
7.422  
7.390  
7.383  
7.370  
7.365  
7.359  
7.351  
7.345  
7.338  
7.332  
7.327  
7.316  
7.305  
7.302  
7.169  
7.145  
6.900  
6.875  
— 6.163

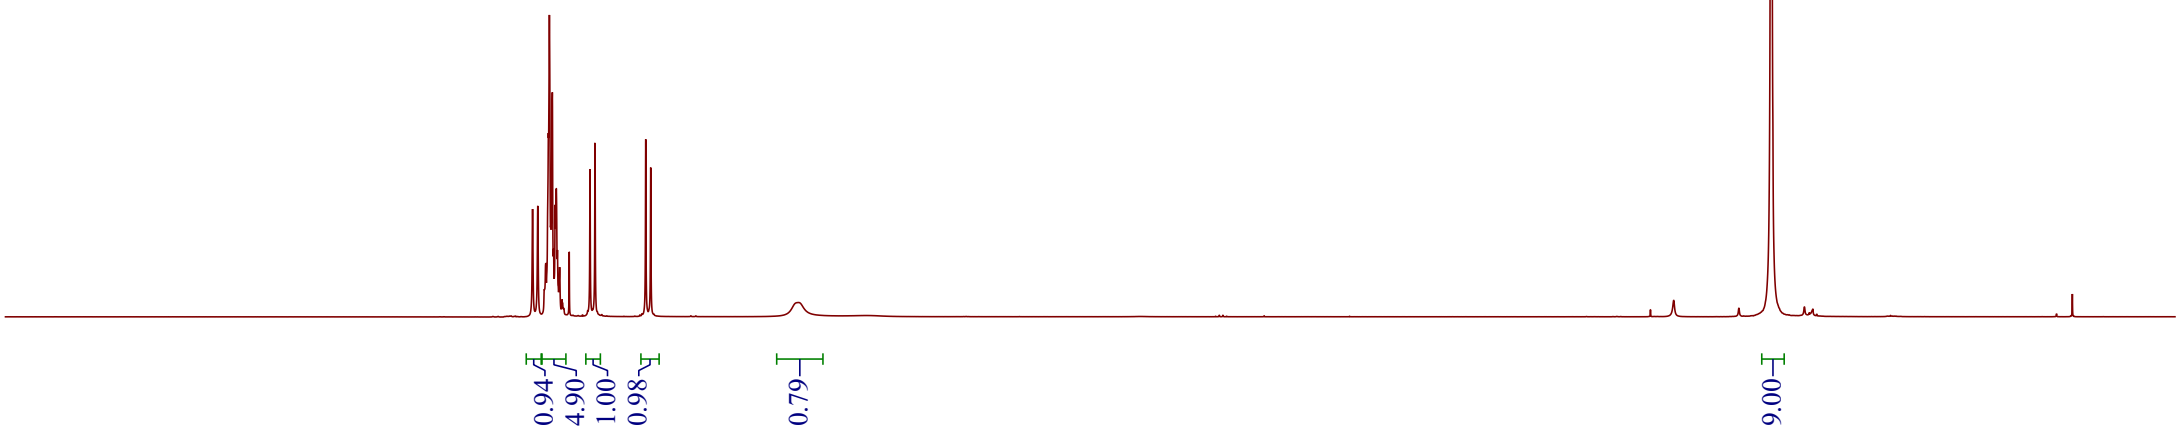

— 0.000

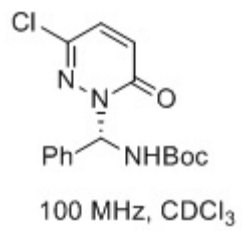

**3h**

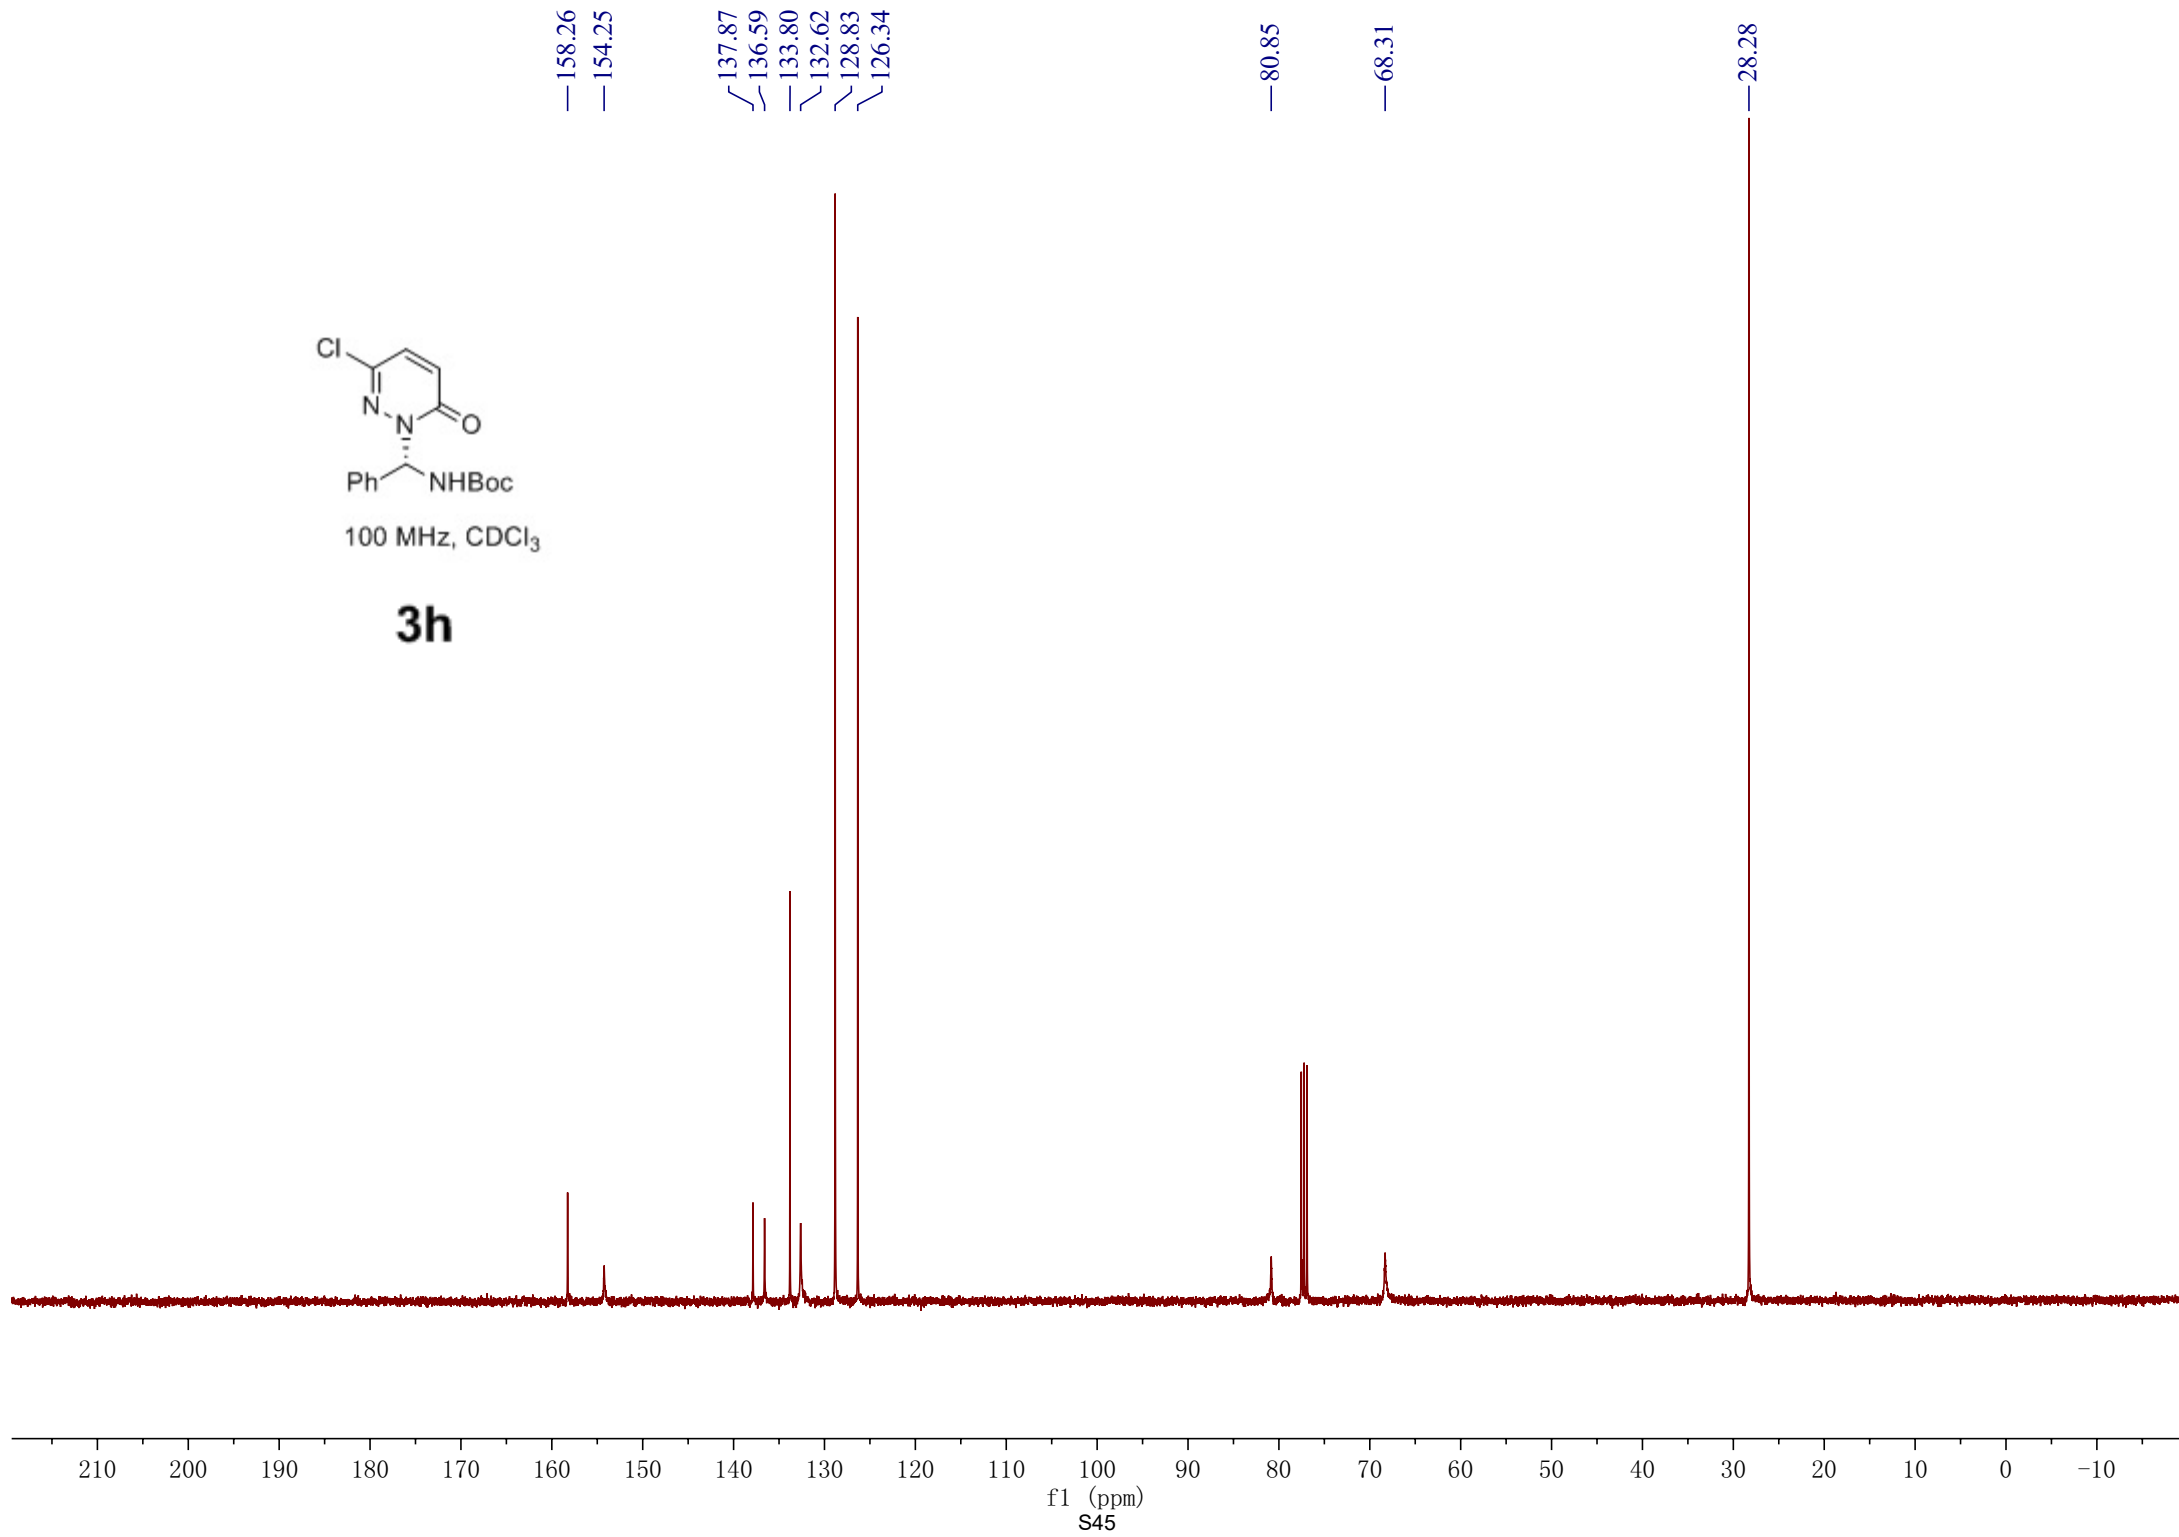

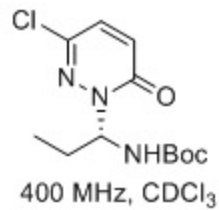

**3i**

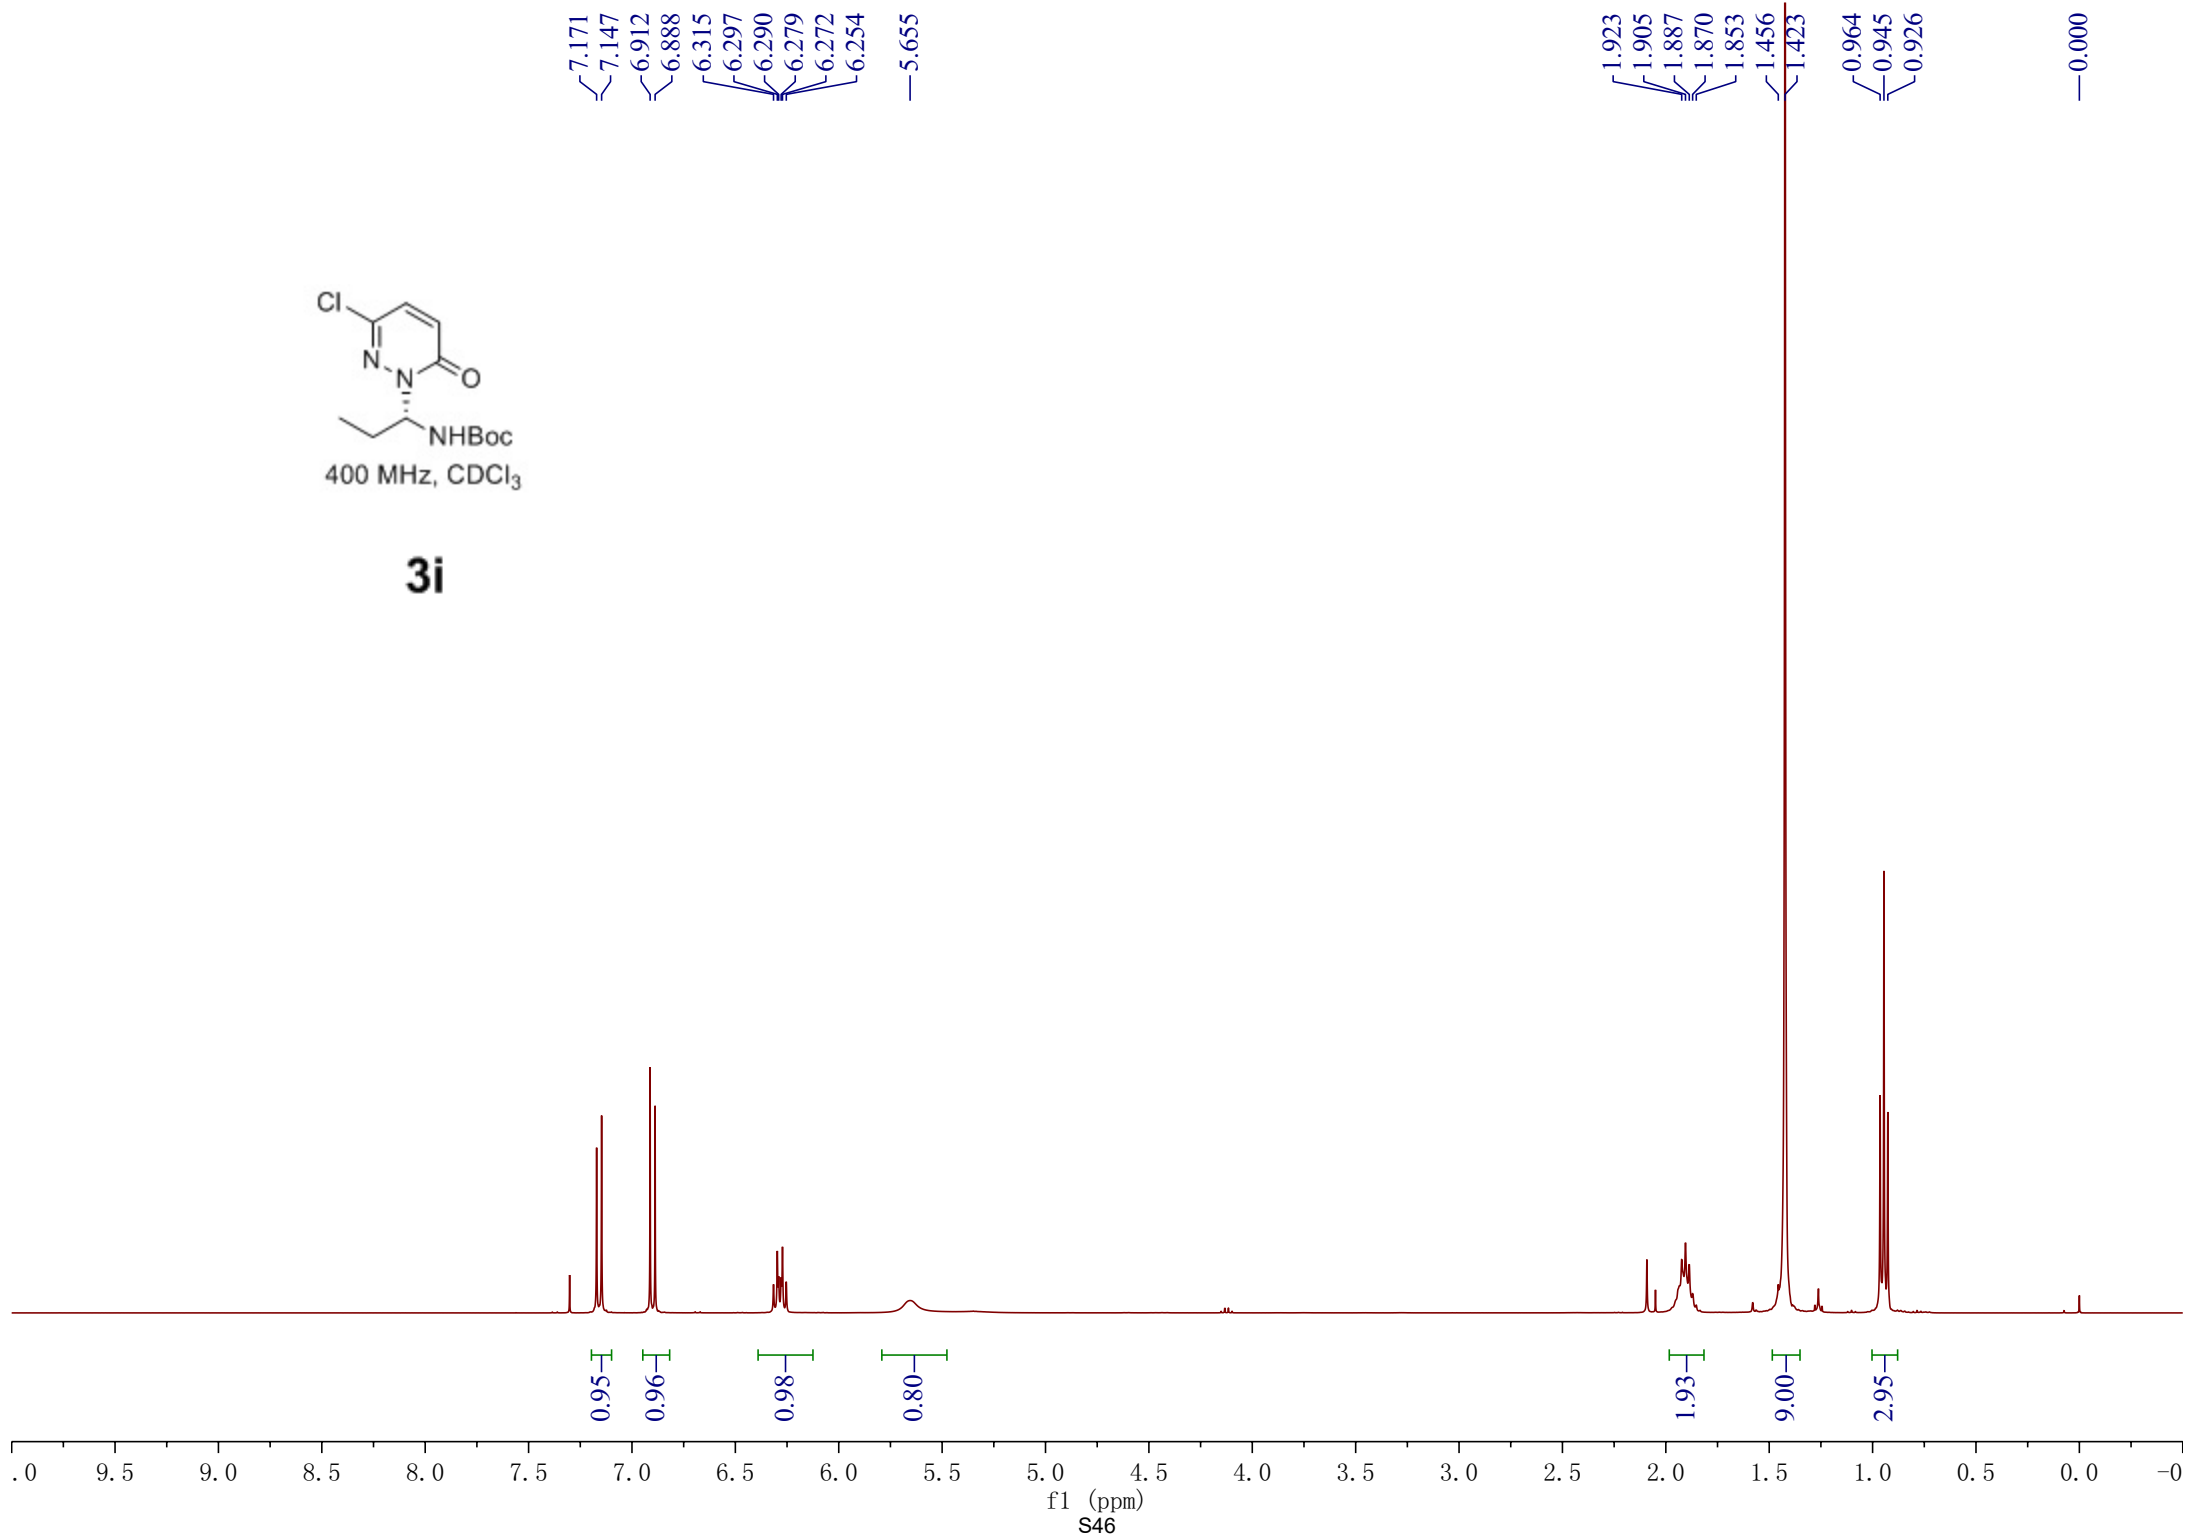



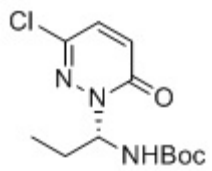

100 MHz, CDCl<sub>3</sub>

**3i**

— 158.46  
— 154.38

~ 137.63  
~ 133.50  
~ 132.56

— 80.50

— 68.04

~ 28.30  
~ 27.15

— 9.69

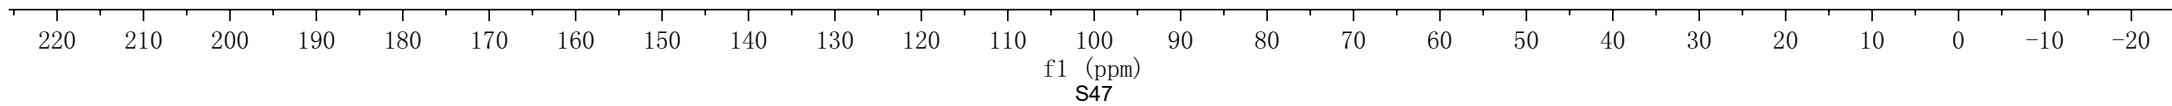

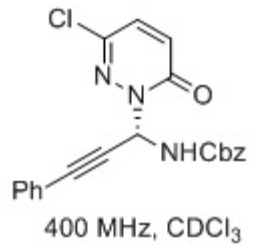

**3j**

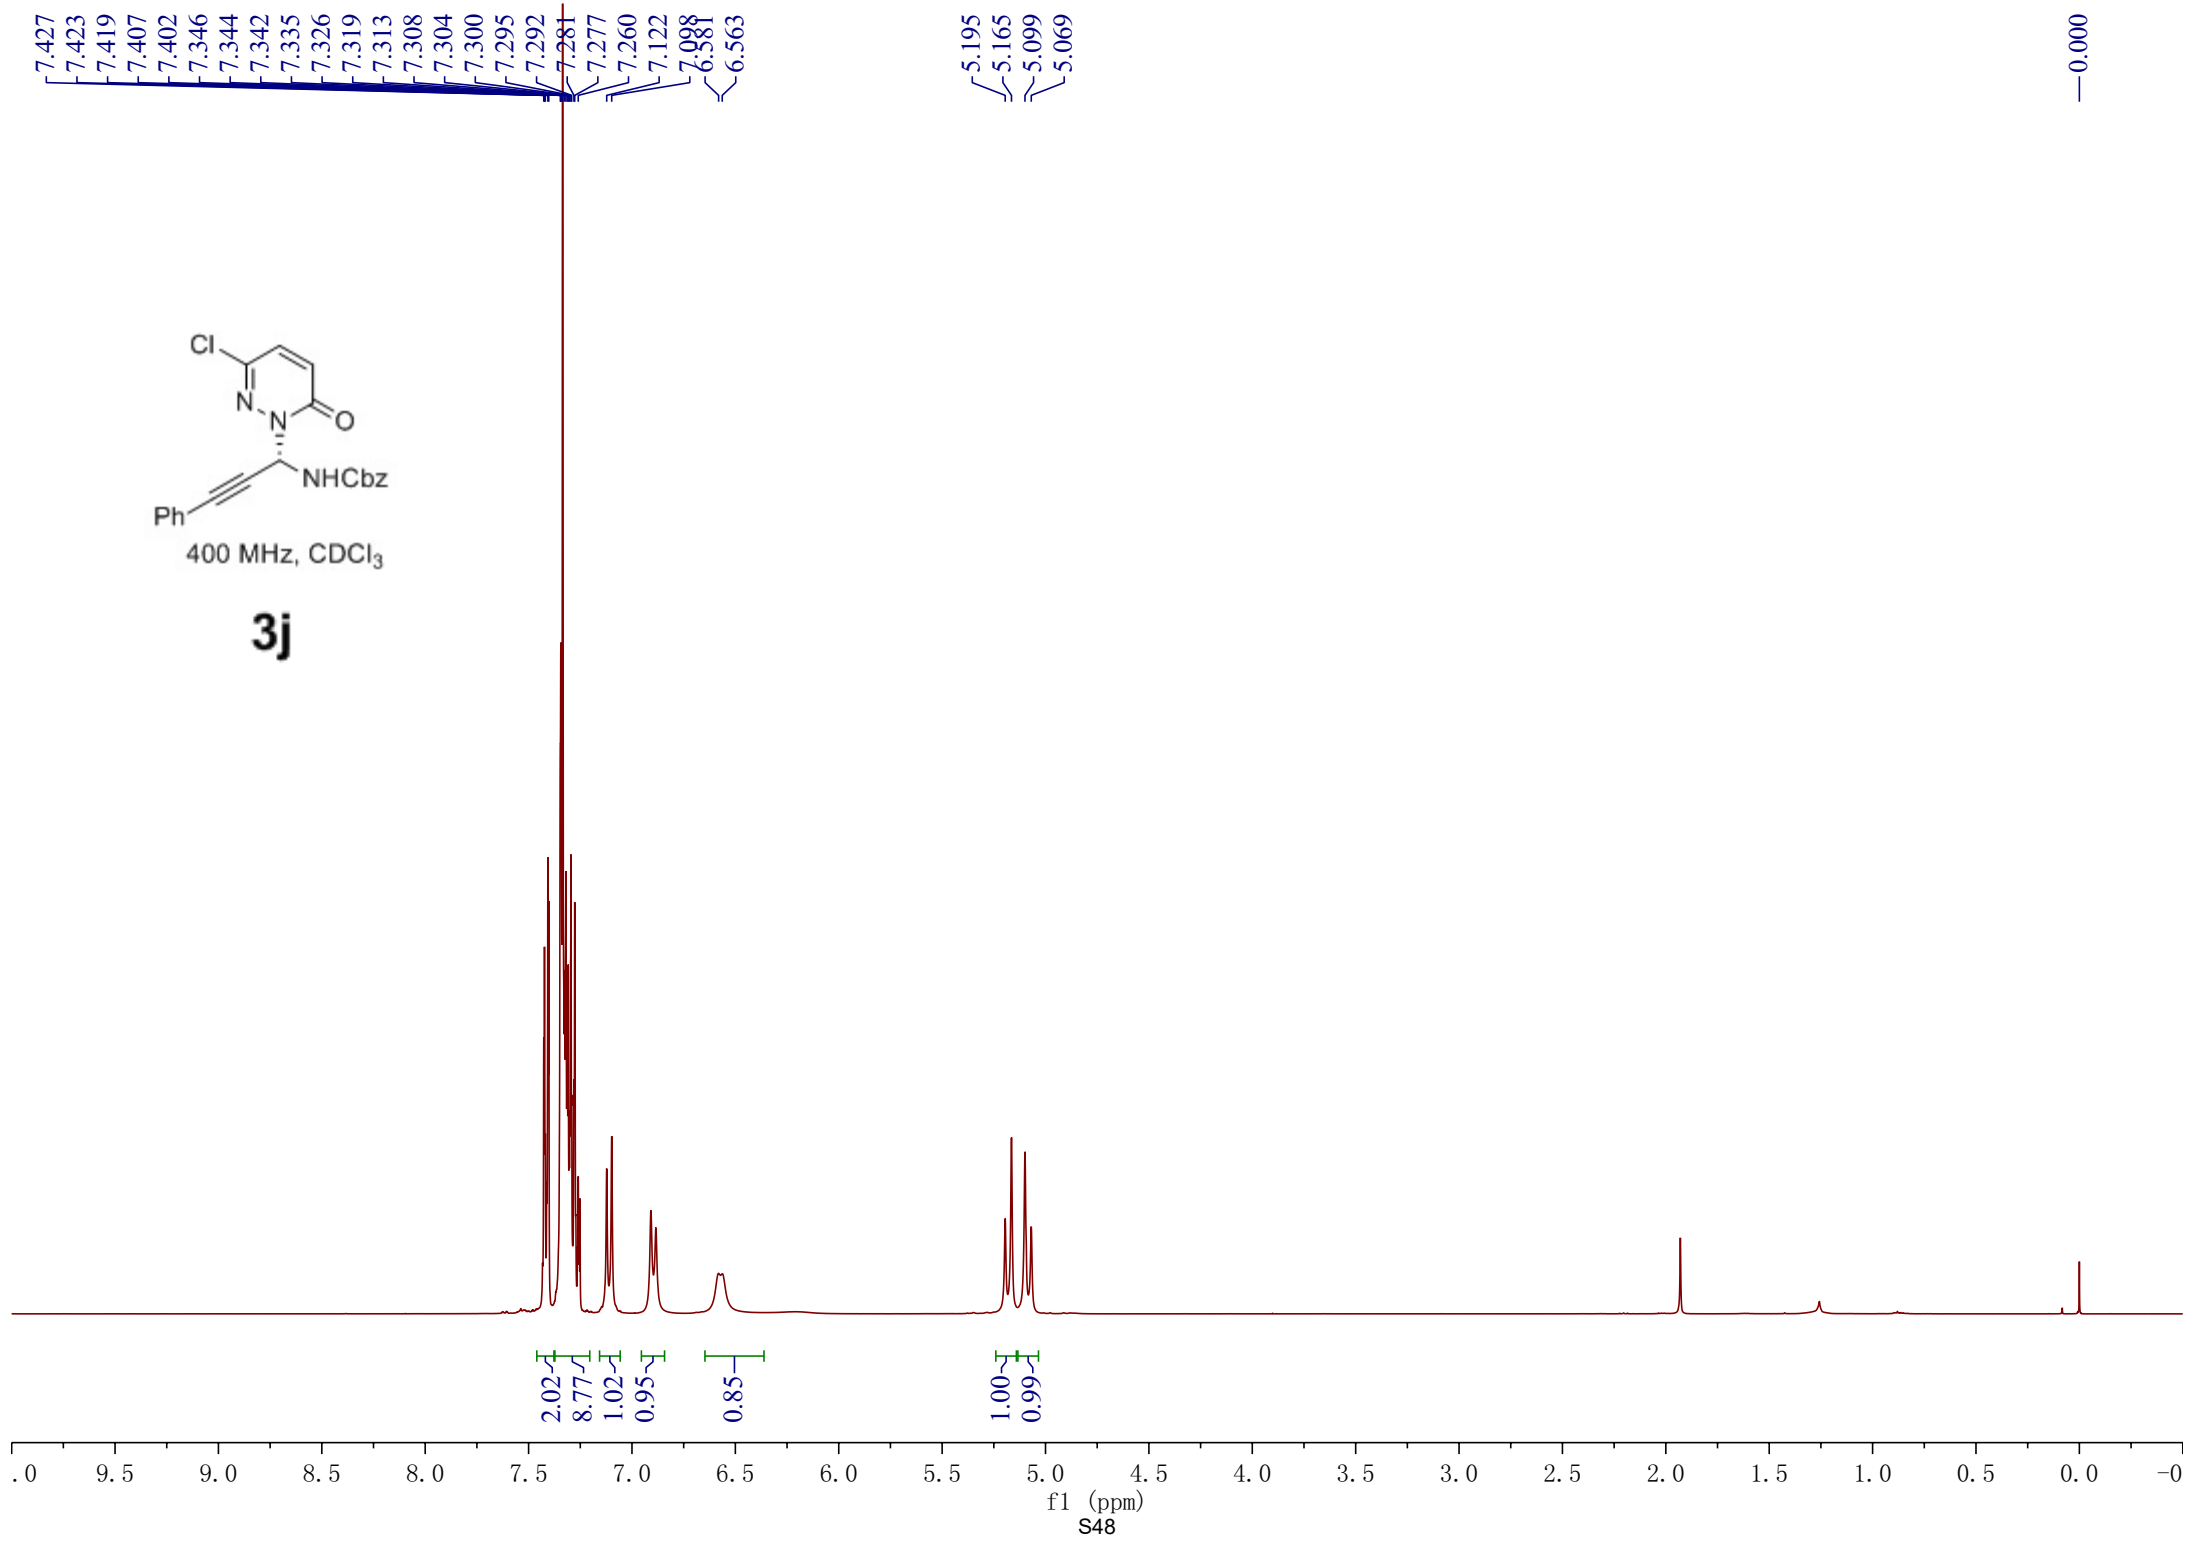

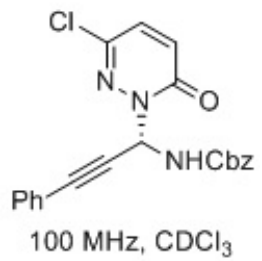

**3j**

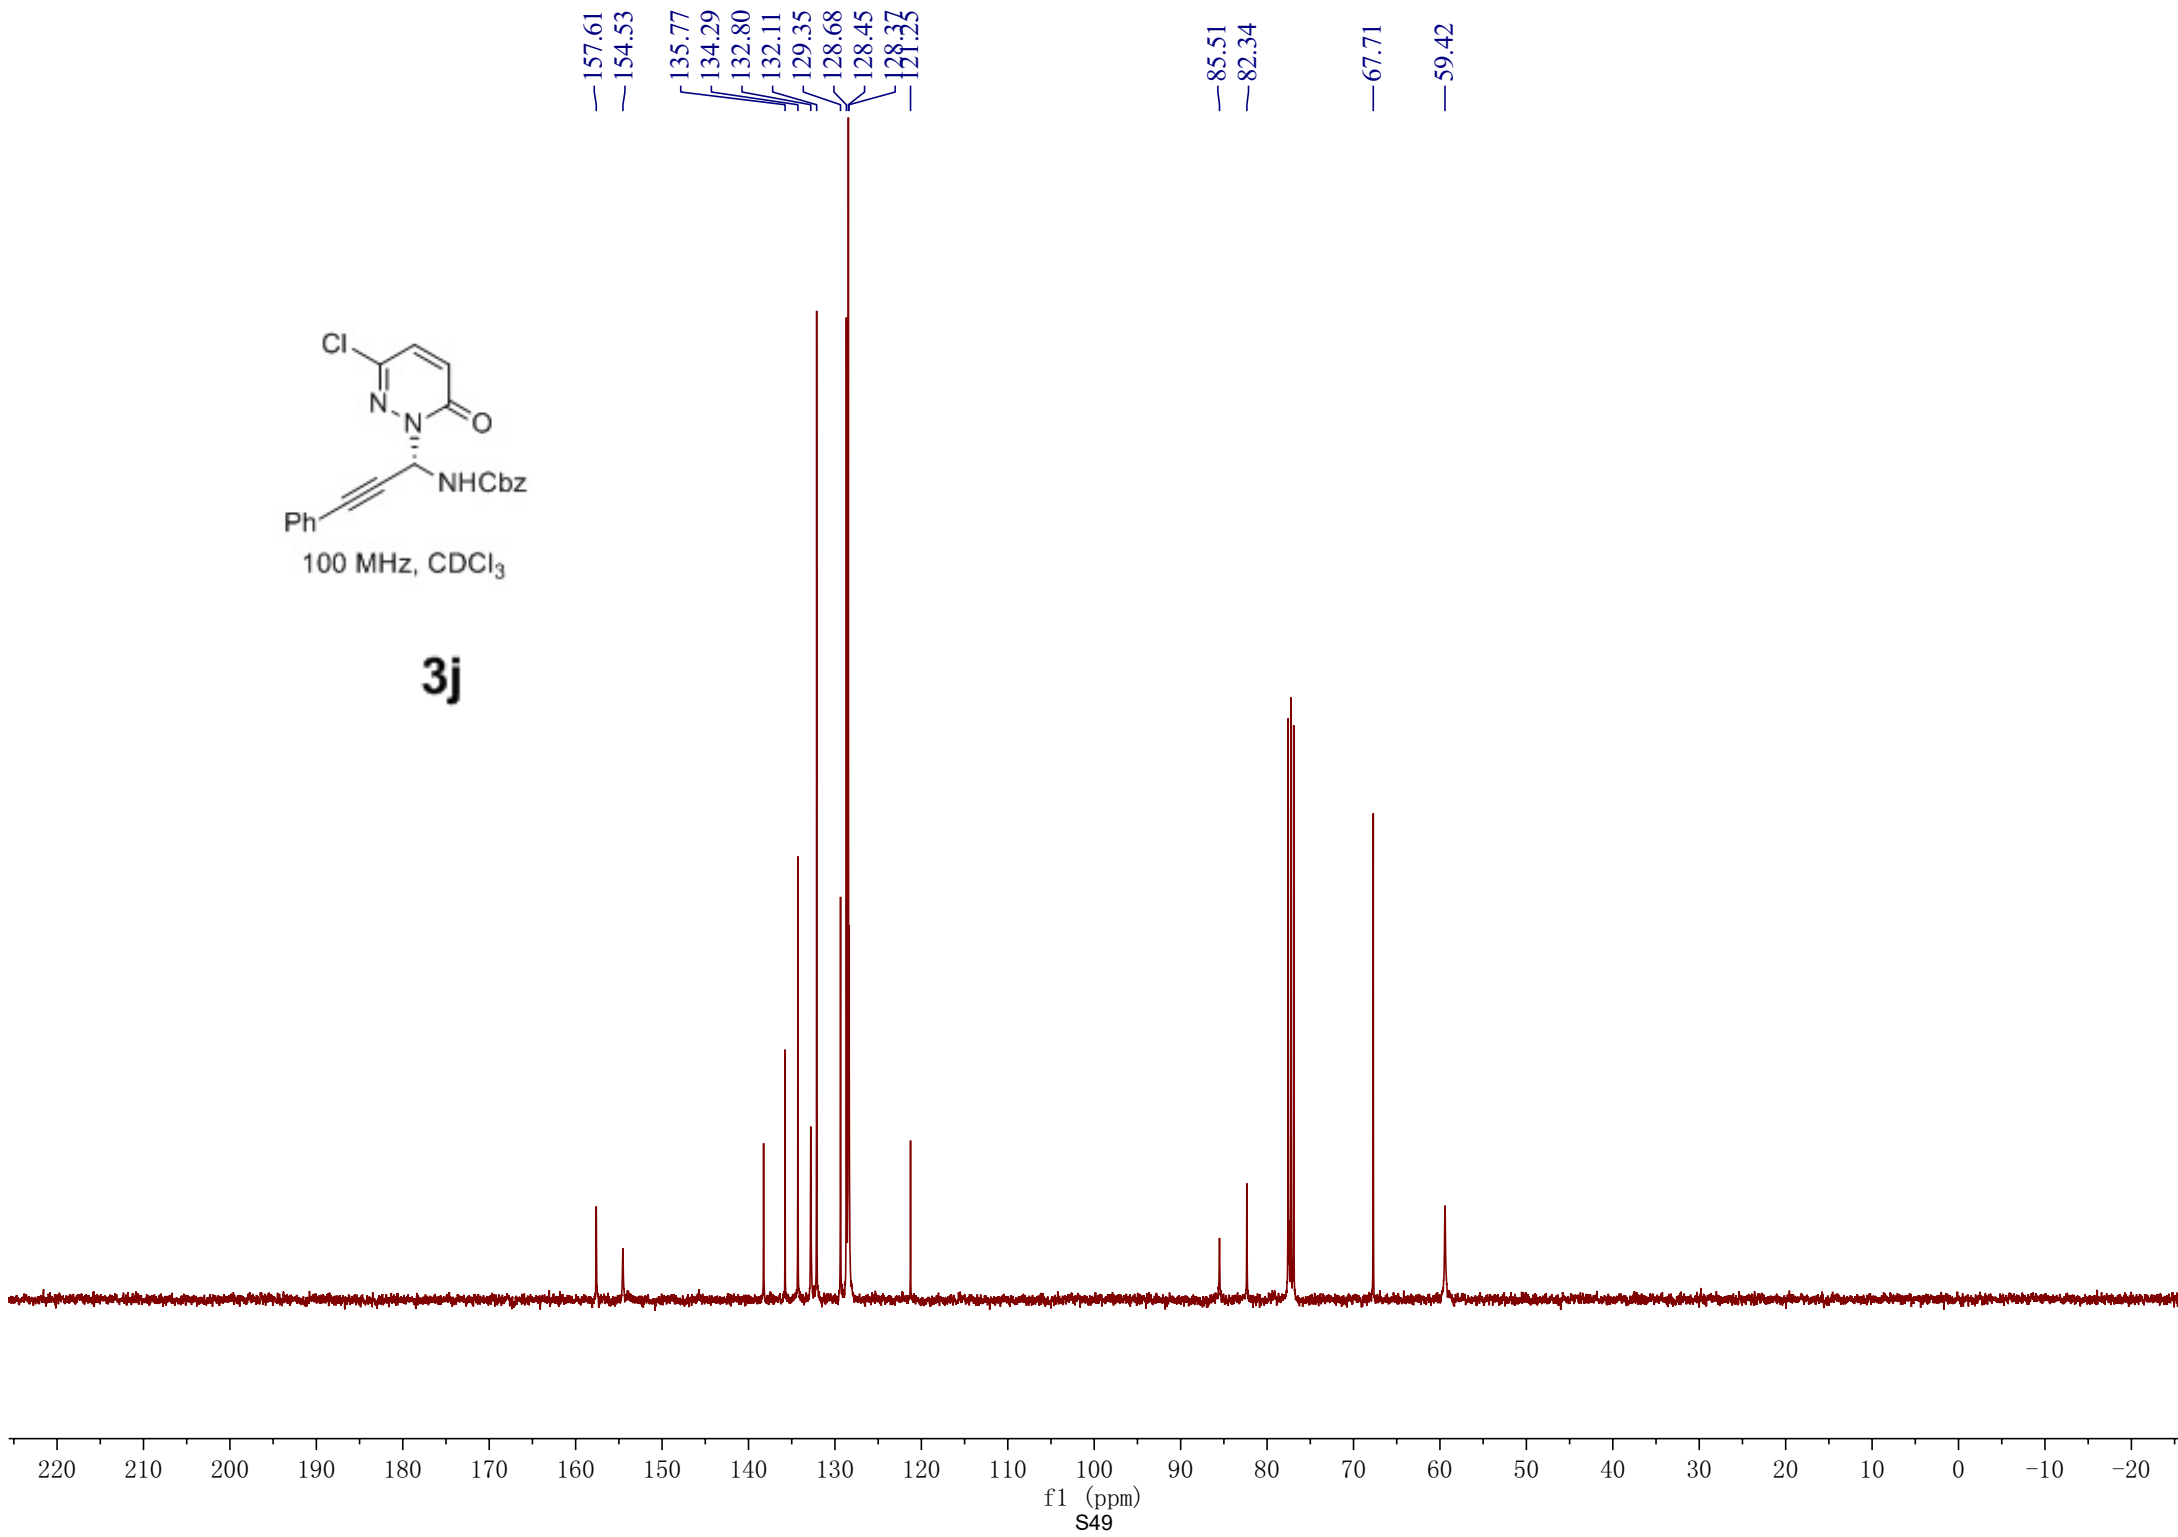

7.993  
7.970  
7.894  
7.876  
7.707  
7.685  
7.545  
7.527  
7.508  
7.457  
7.454  
7.441  
7.438  
7.434  
7.423  
7.356  
7.353  
7.347  
7.338  
7.331  
7.320  
7.316  
7.309  
7.290  
7.273  
7.269  
7.243  
7.149  
7.124  
6.970  
6.945

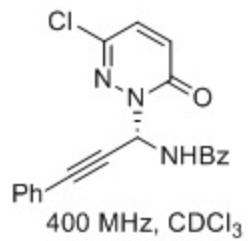

**3k**

0.98  
1.95  
0.97  
1.02  
3.86  
3.00  
1.00  
1.00

0 9.5 9.0 8.5 8.0 7.5 7.0 6.5 6.0 5.5 5.0 4.5 4.0 3.5 3.0 2.5 2.0 1.5 1.0 0.5 0.0 -0

f1 (ppm)  
S50

-0.000

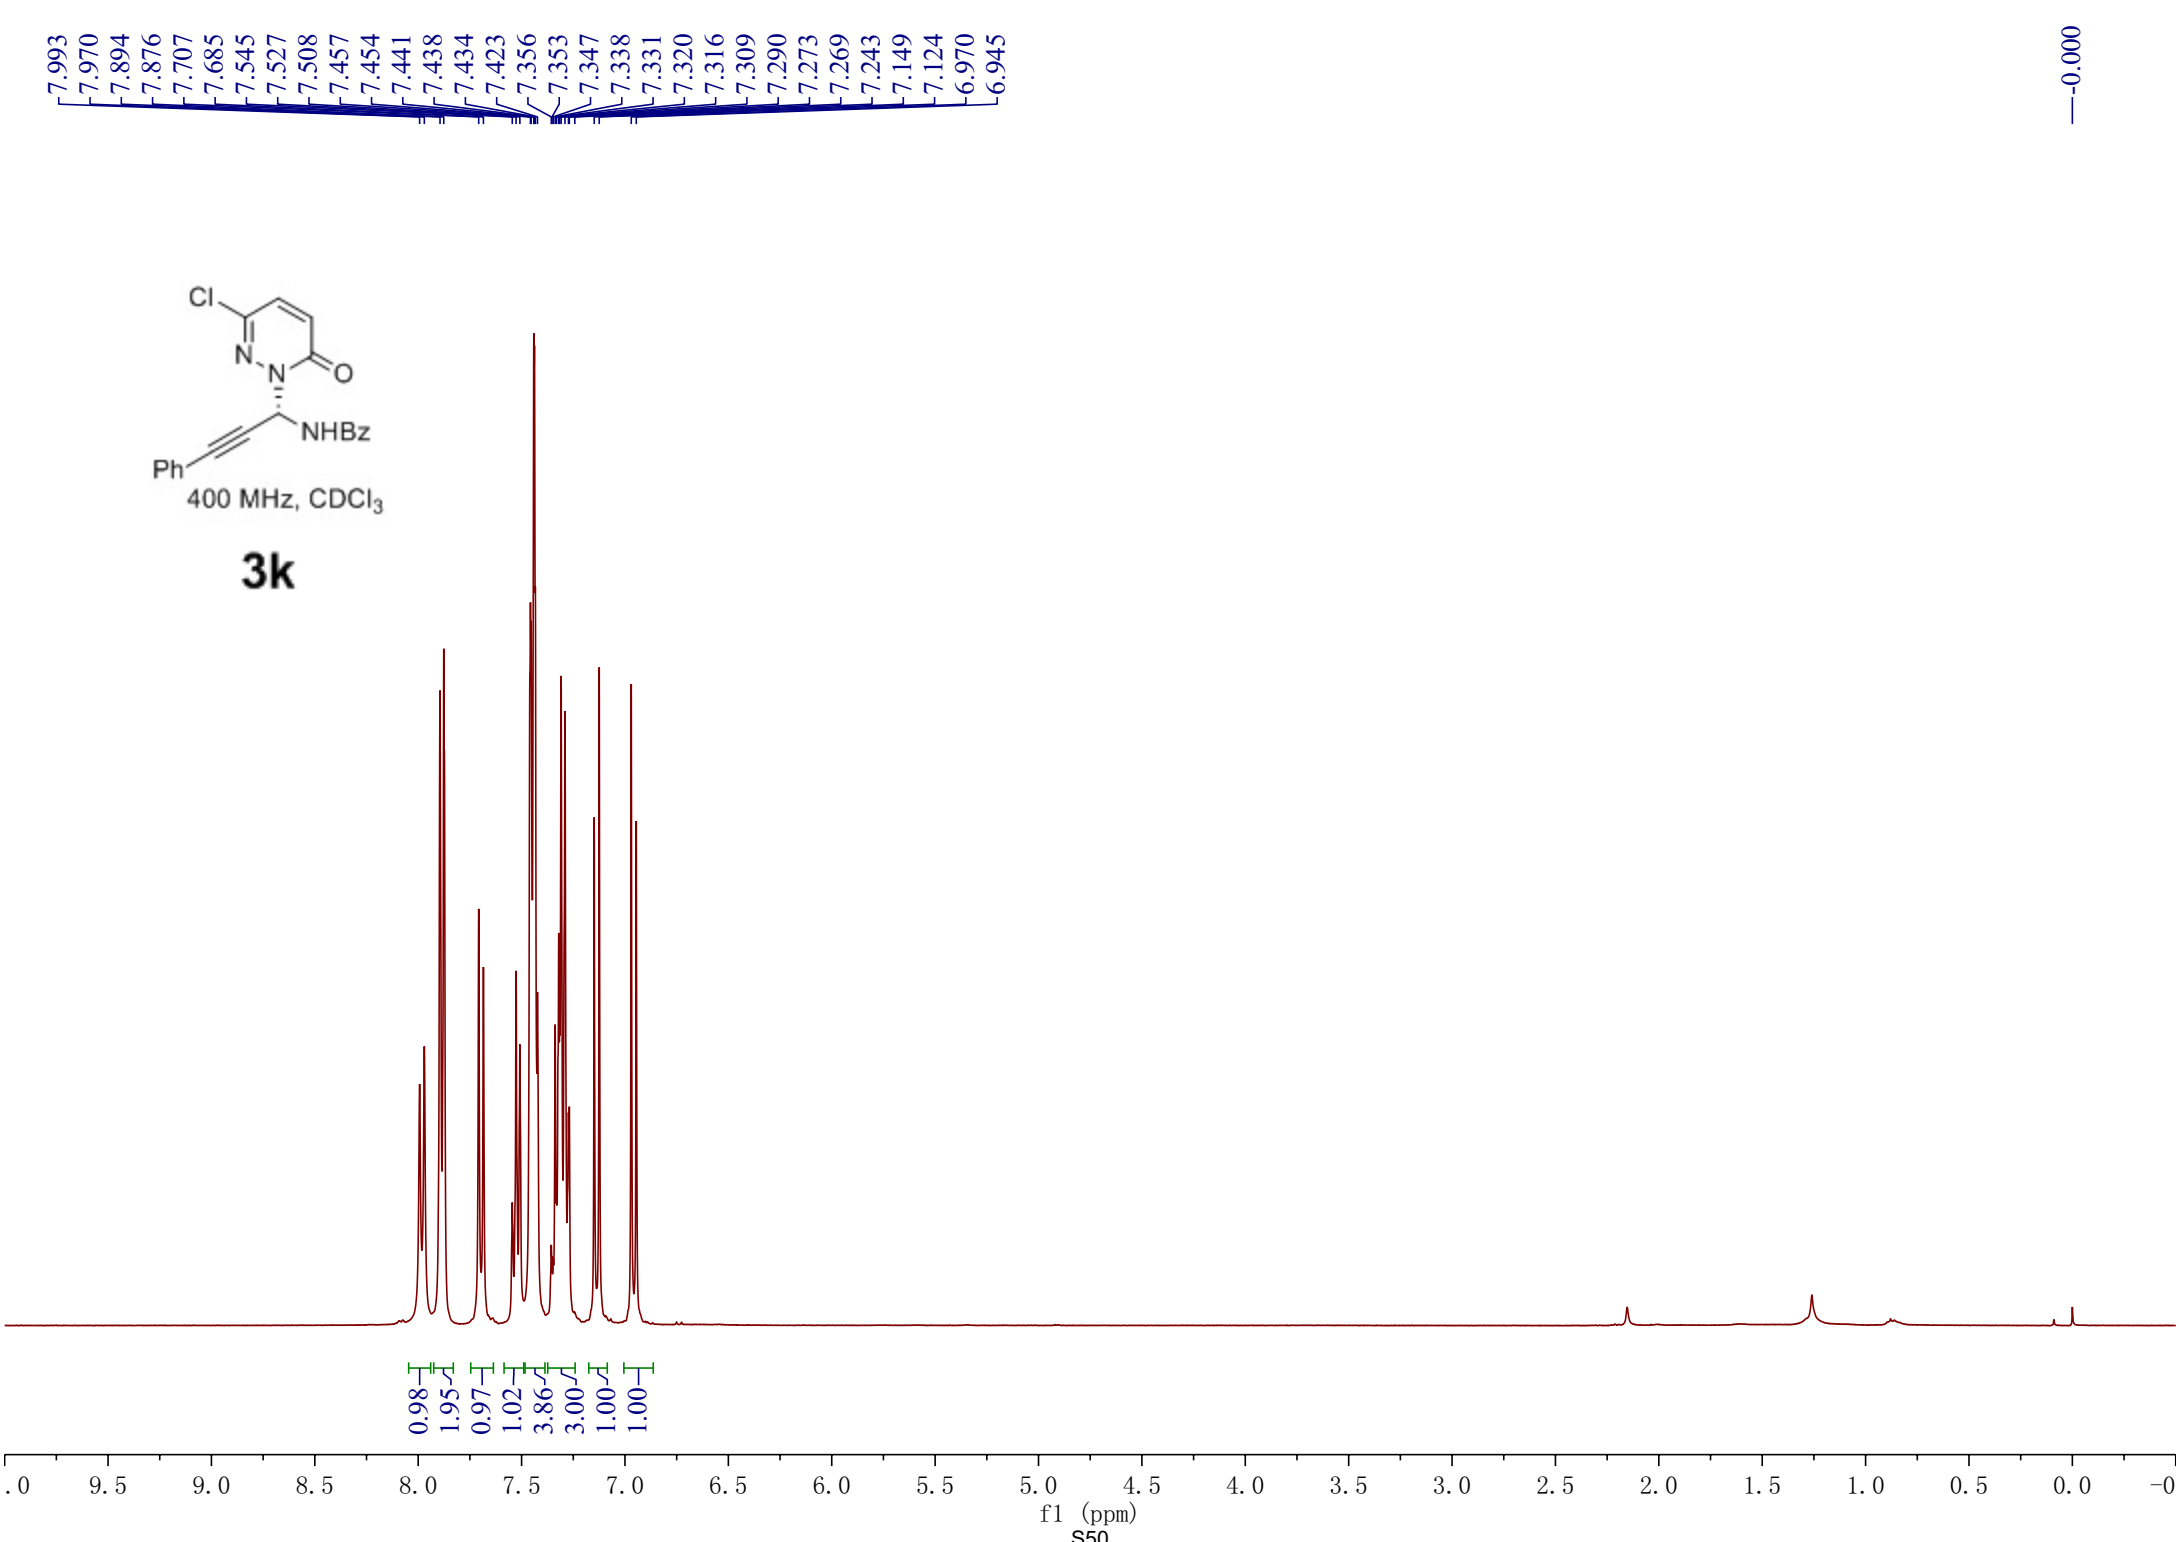

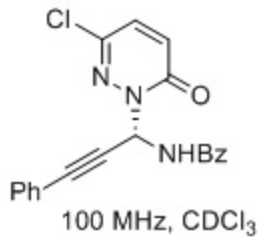

**3k**

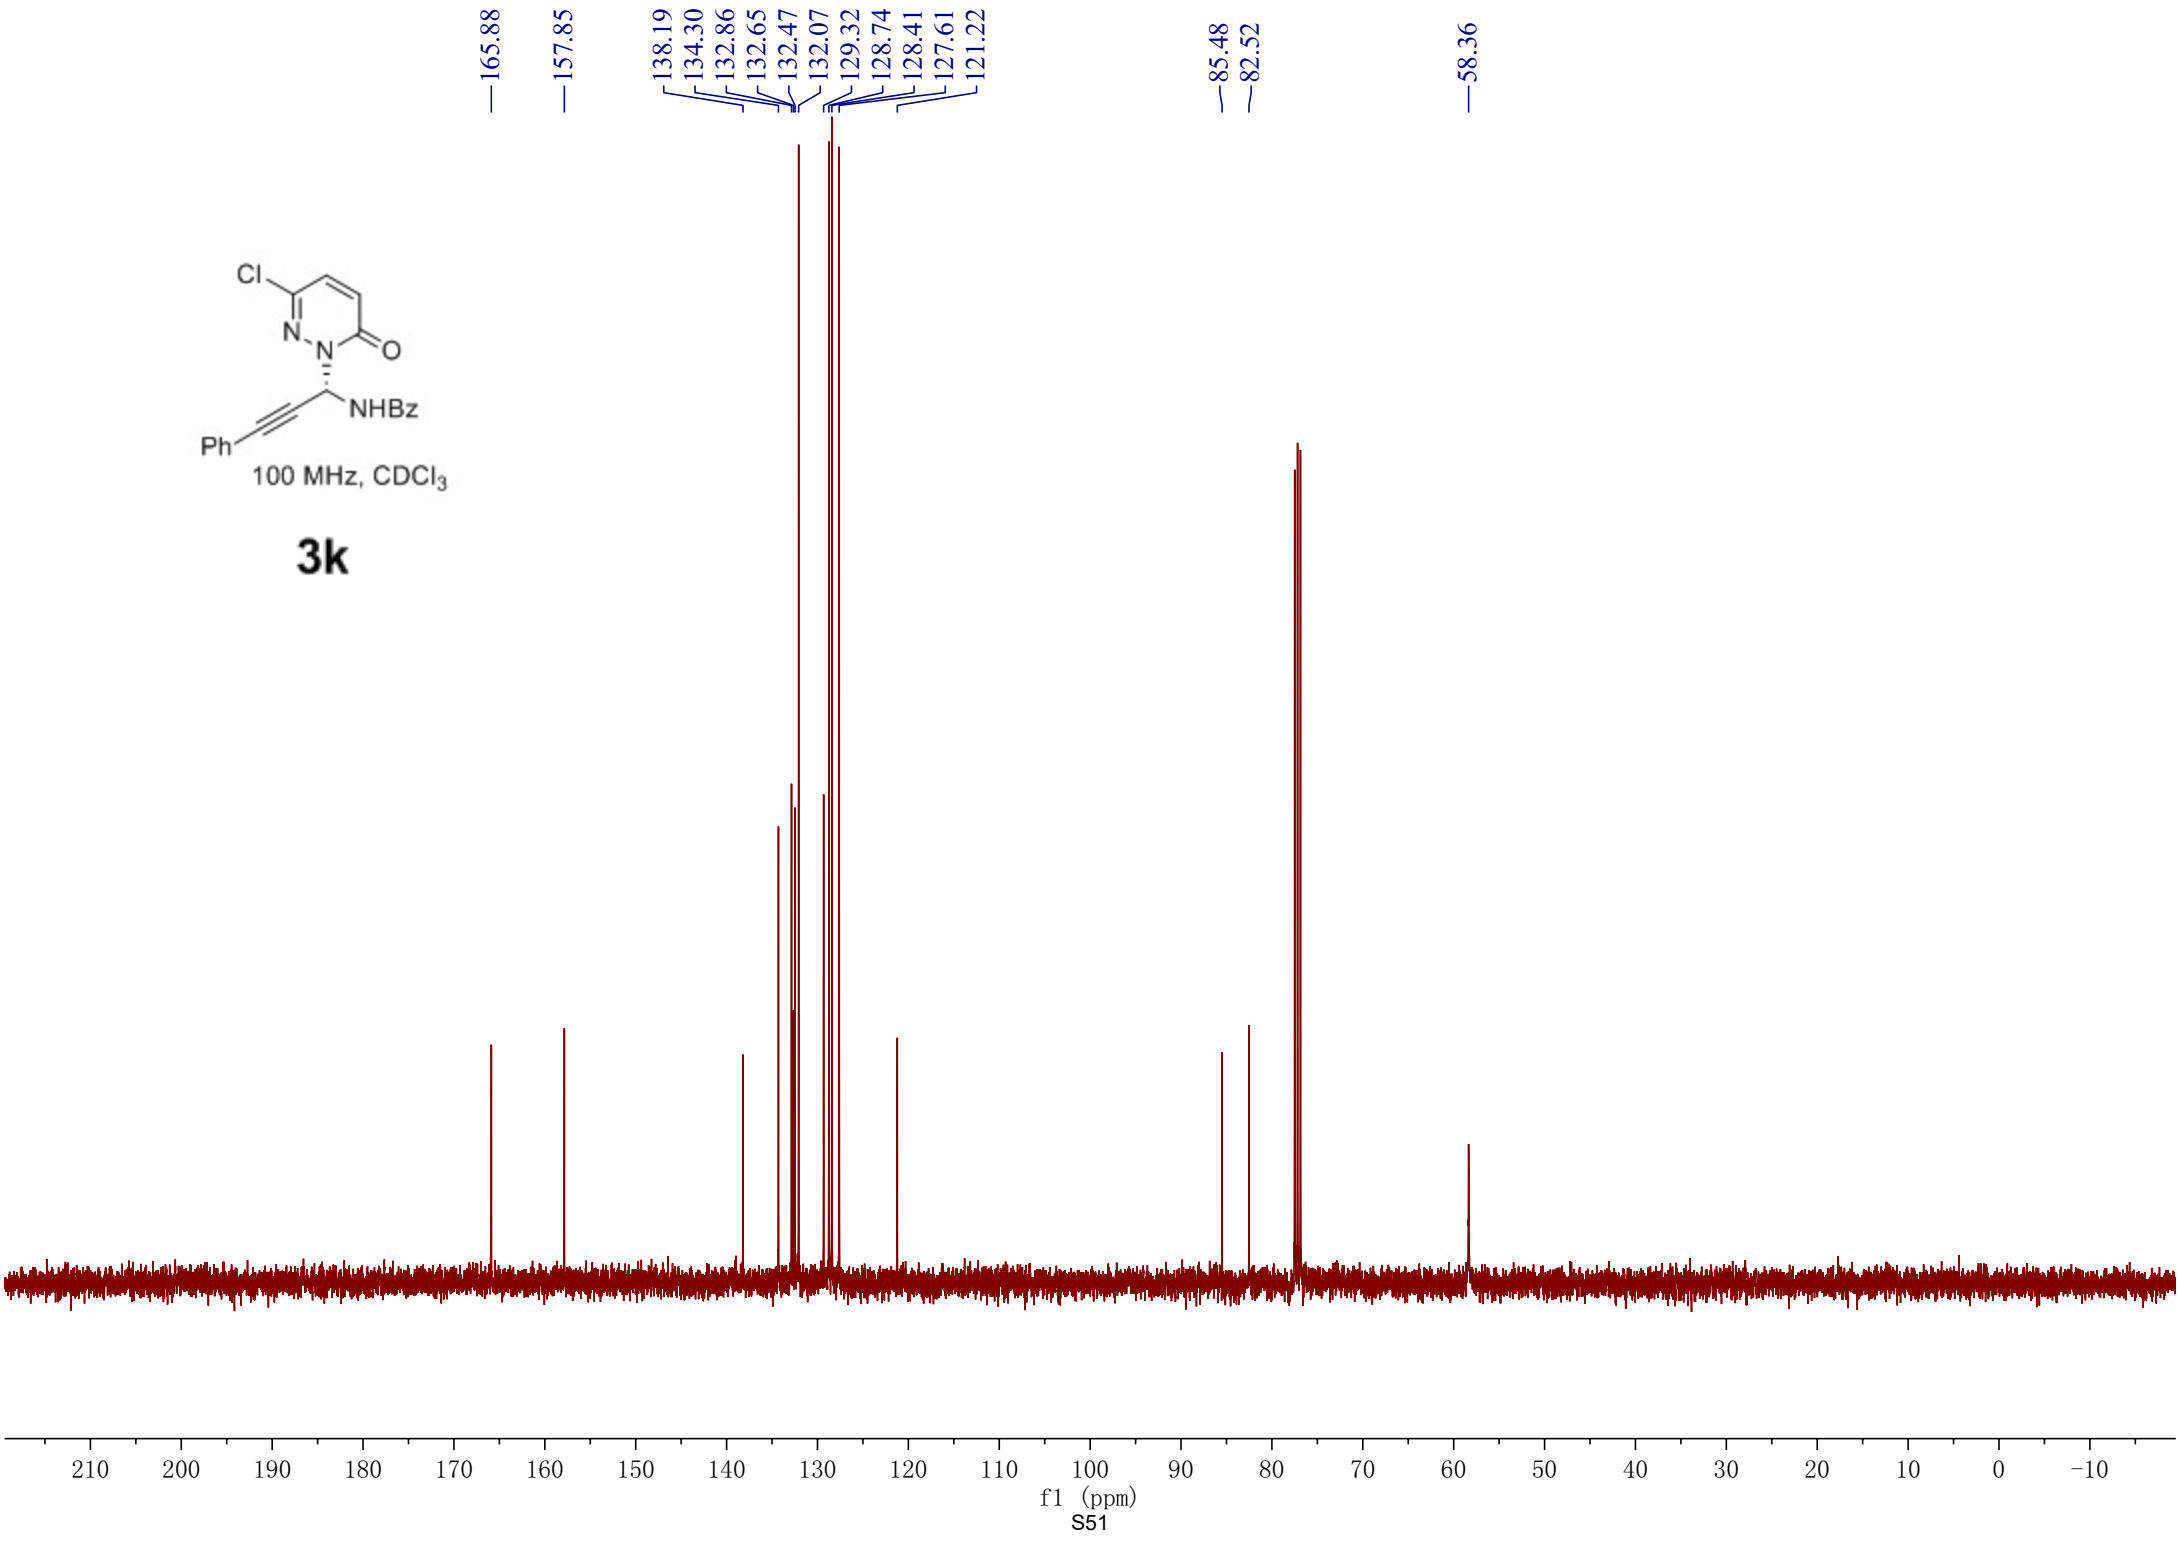

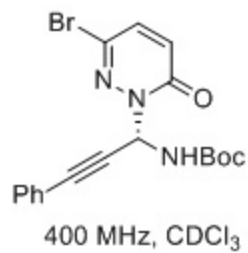

**3I**

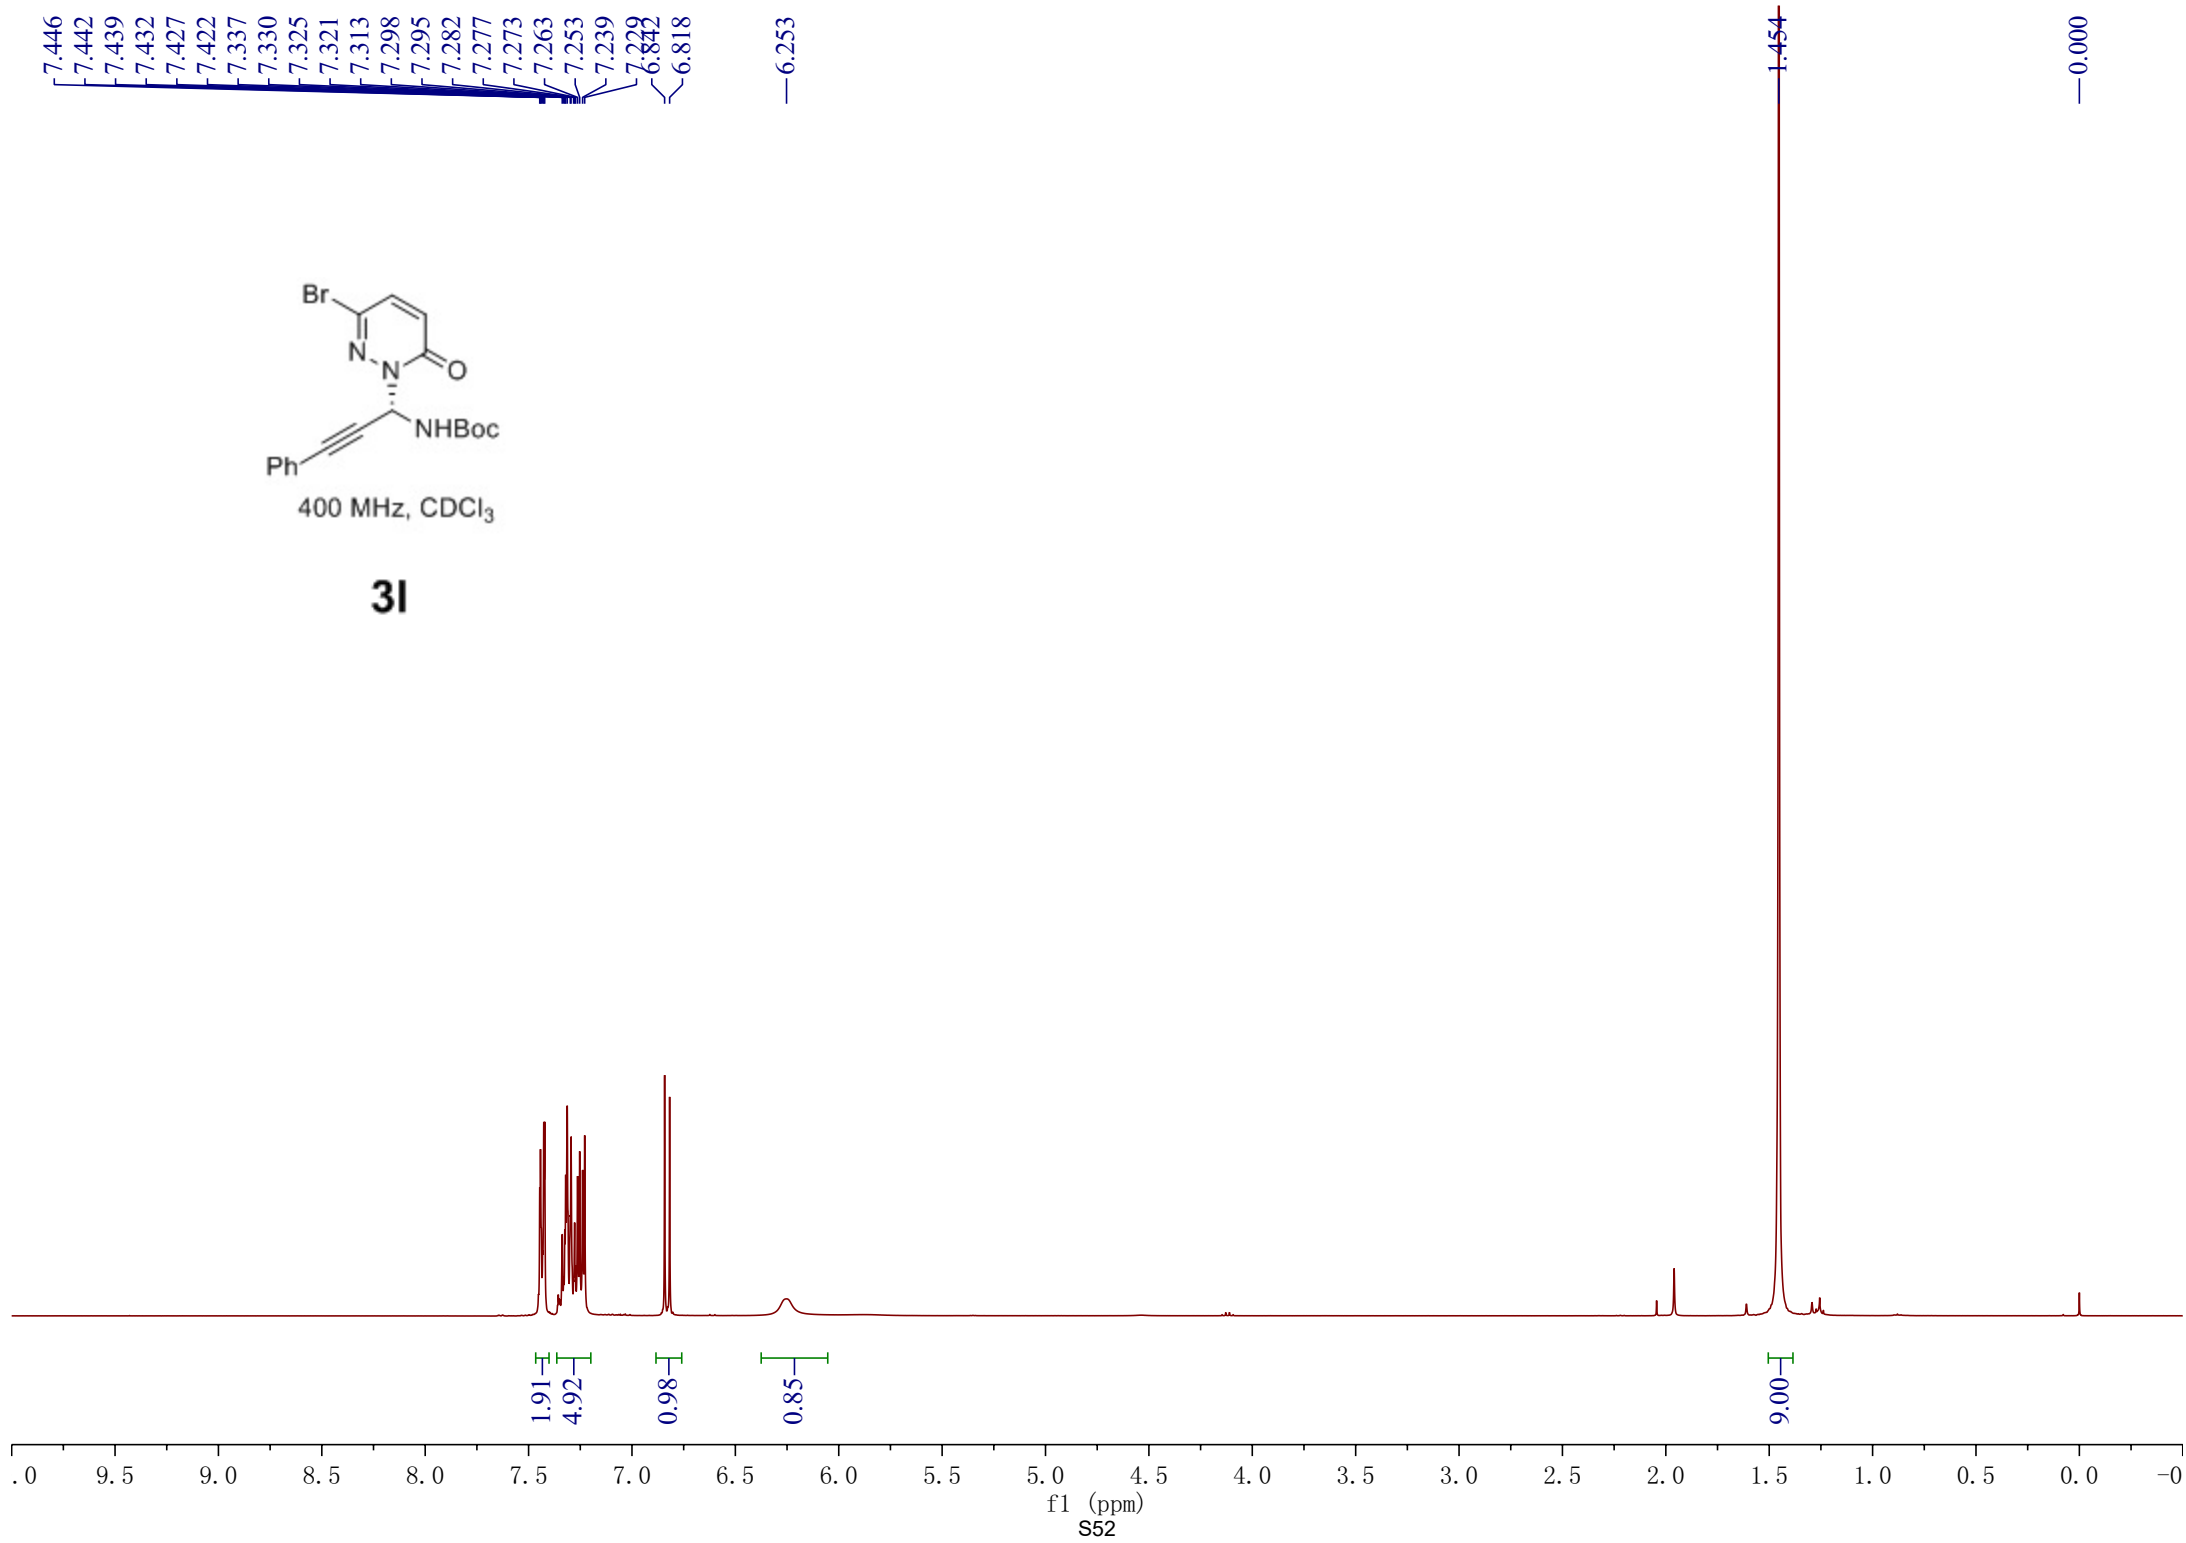

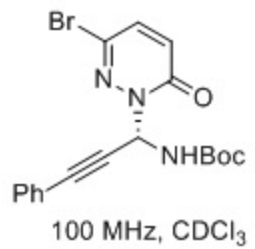

**31**

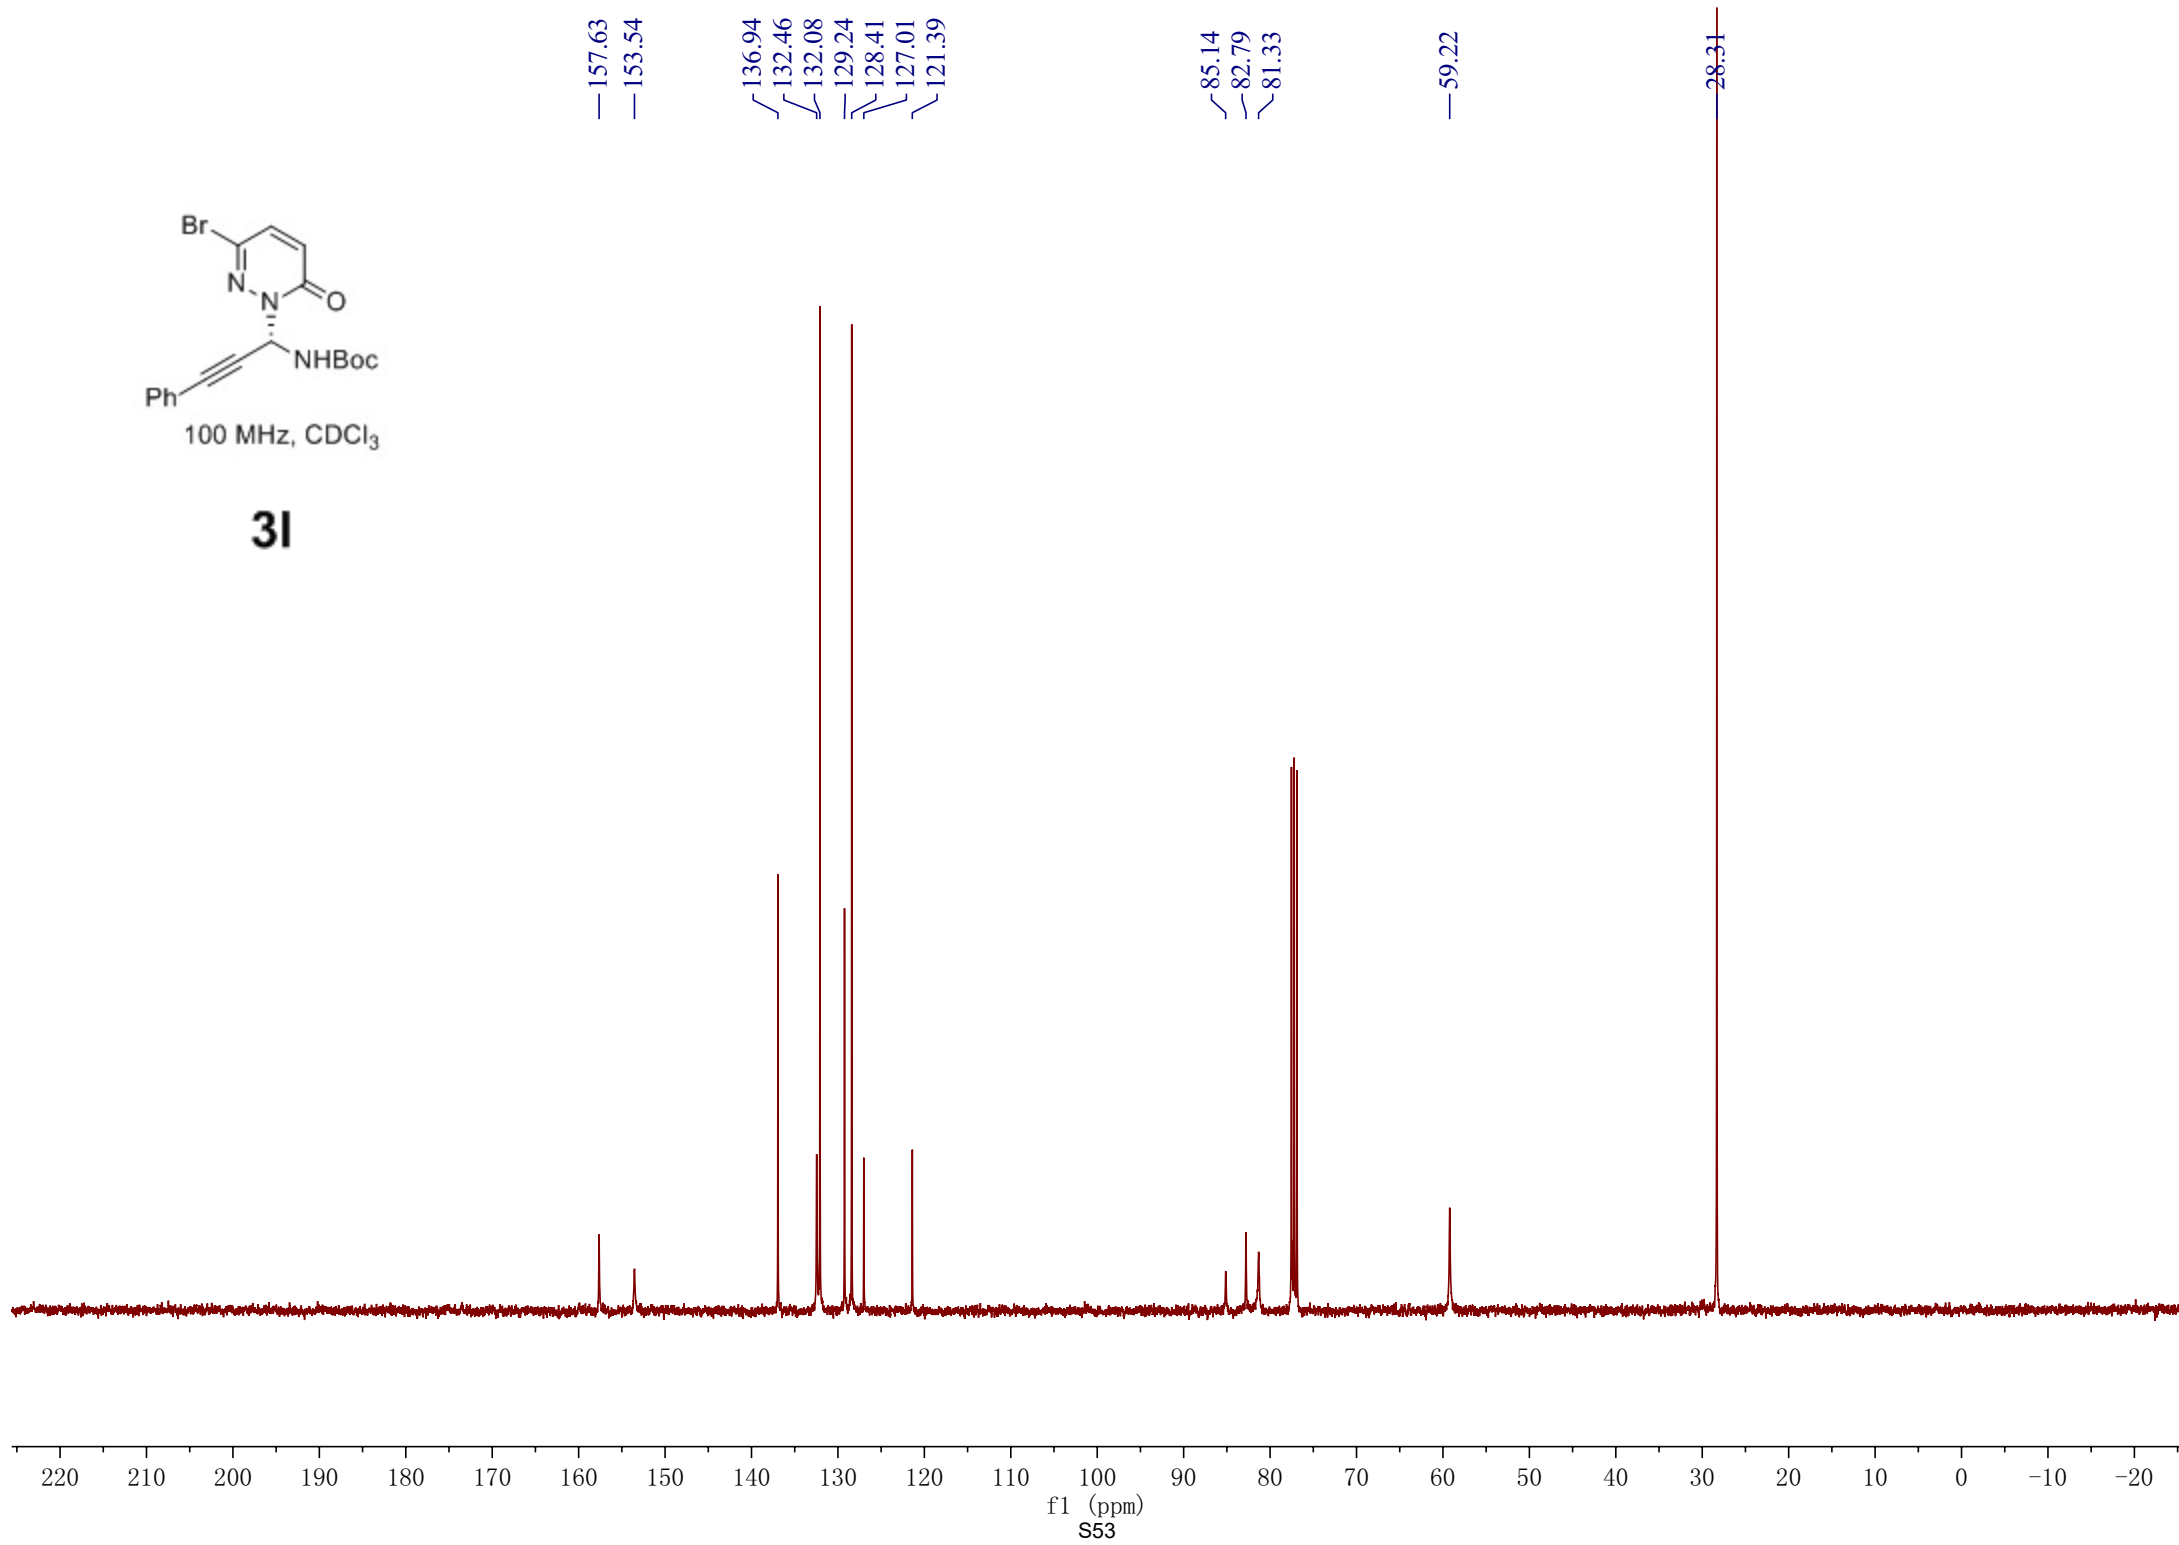

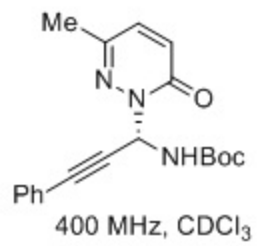

**3m**

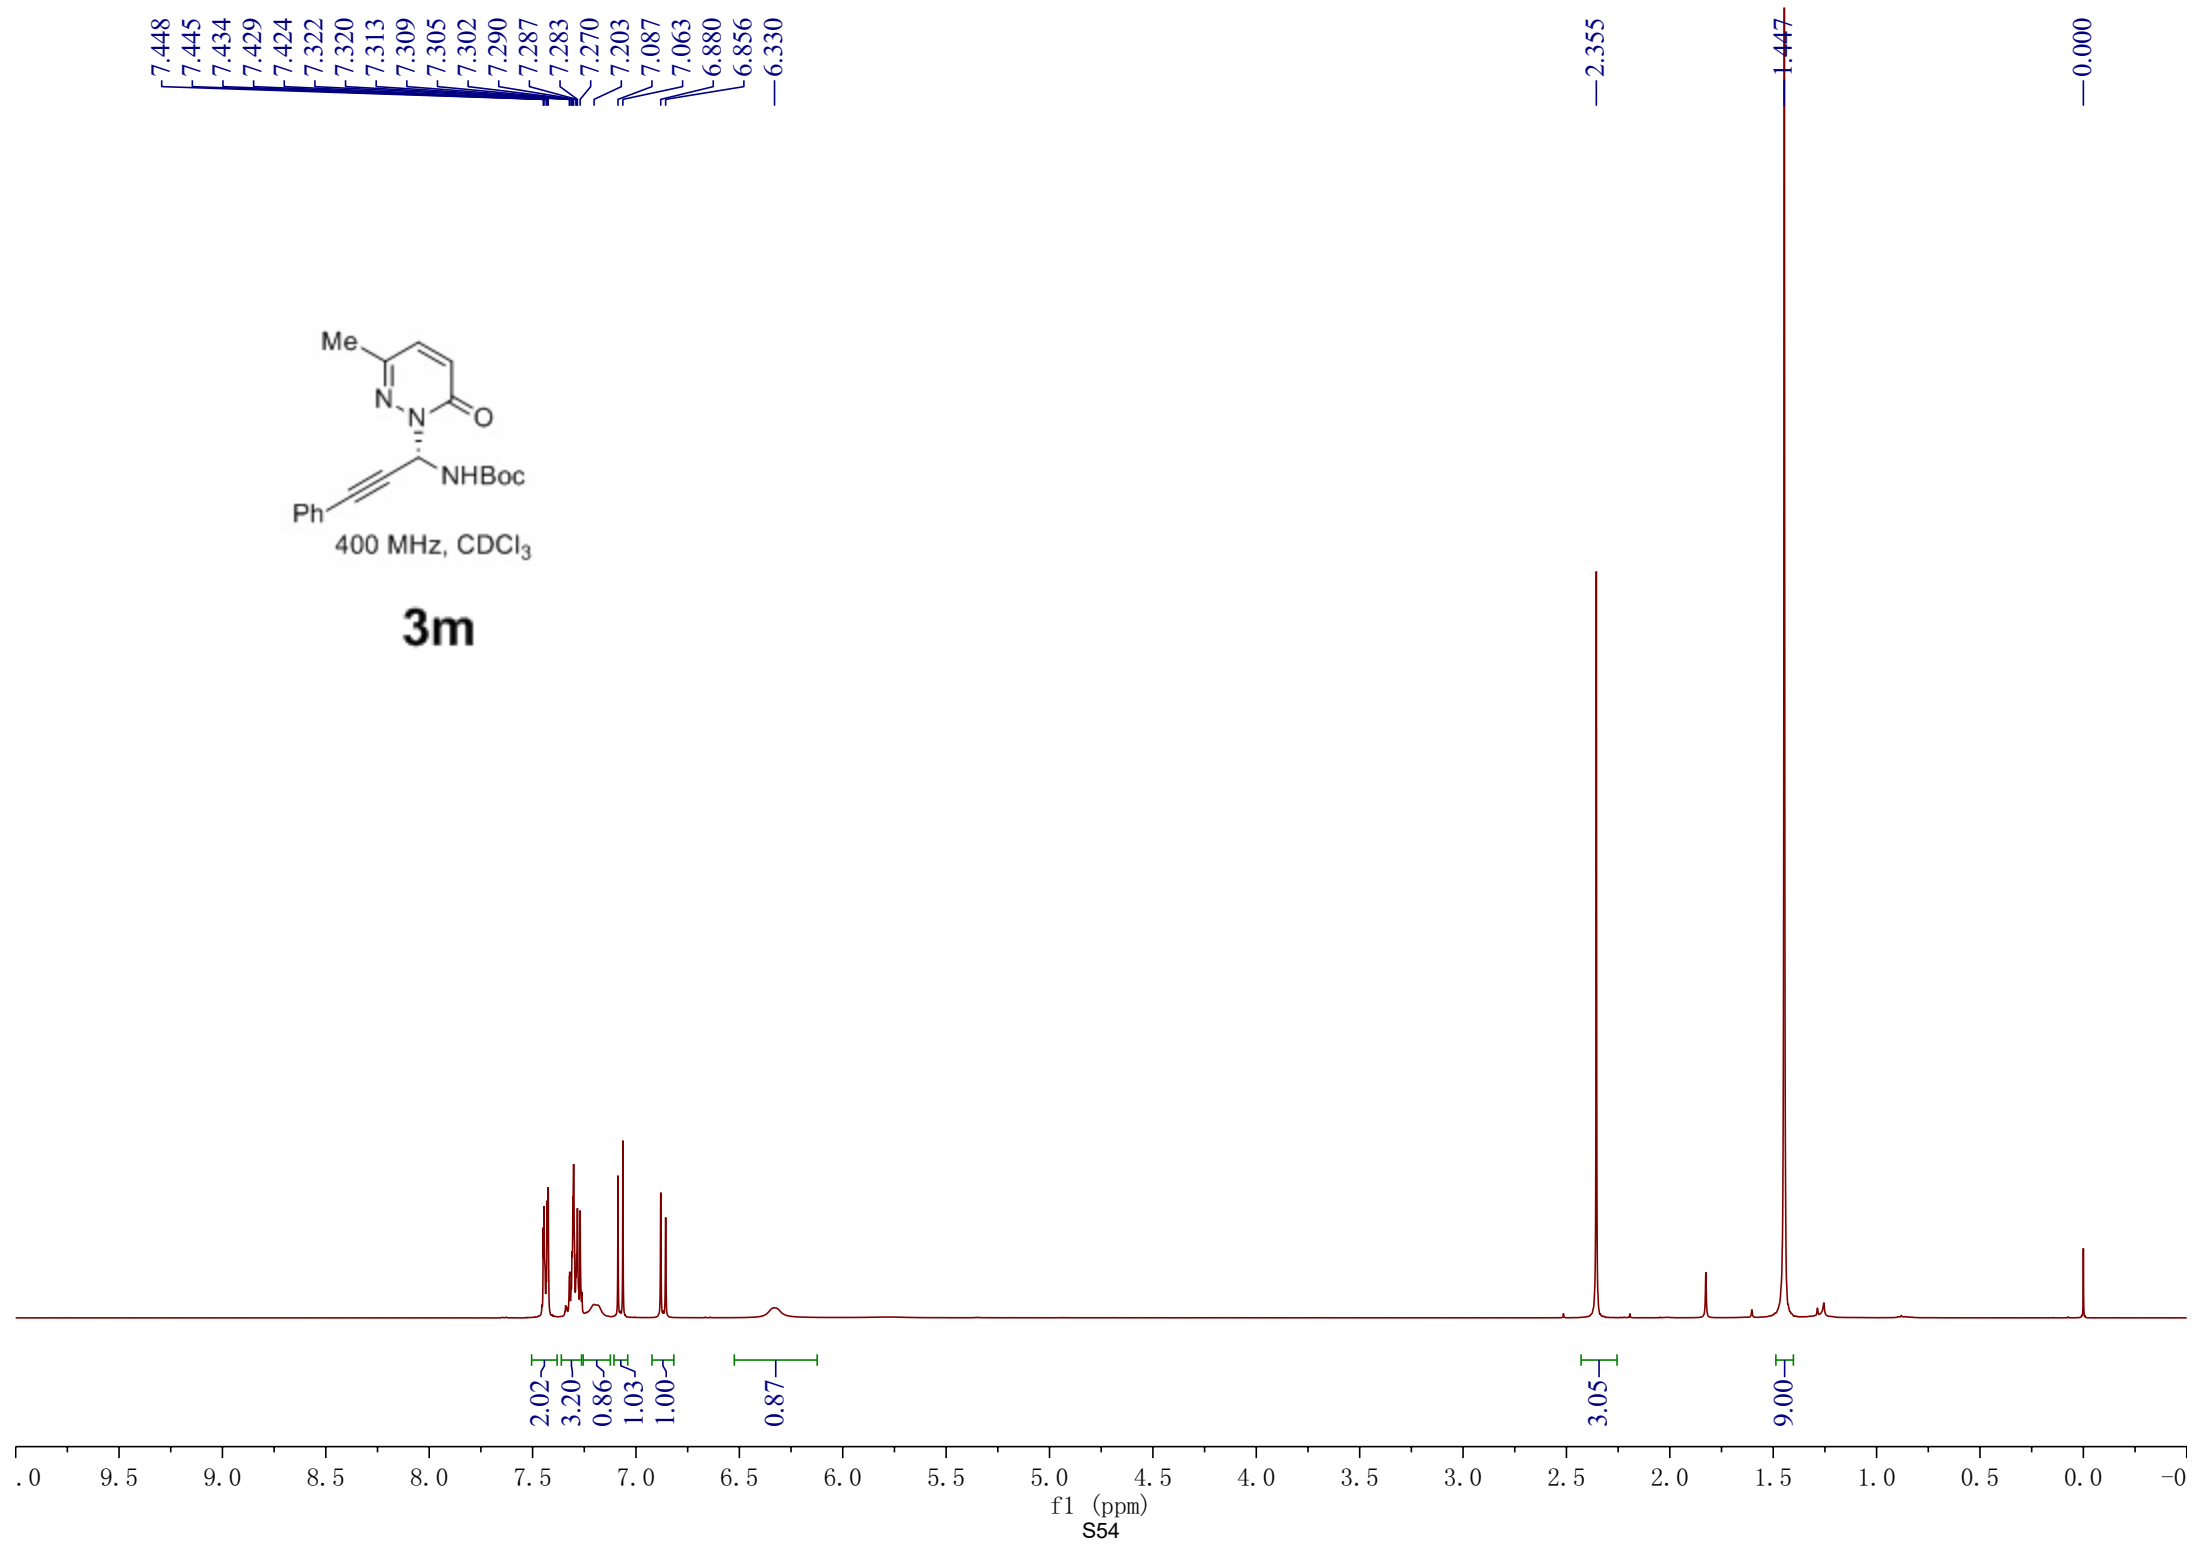



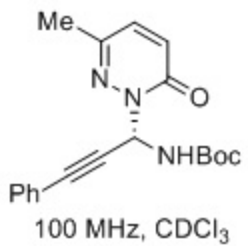

**3m**

- 158.51
- 153.67
- 144.73
- 133.78
- 132.00
- 130.60
- 128.90
- 128.24
- 121.69
- 84.24
- 83.56
- 80.86
- 59.91
- 28.25
- 20.91

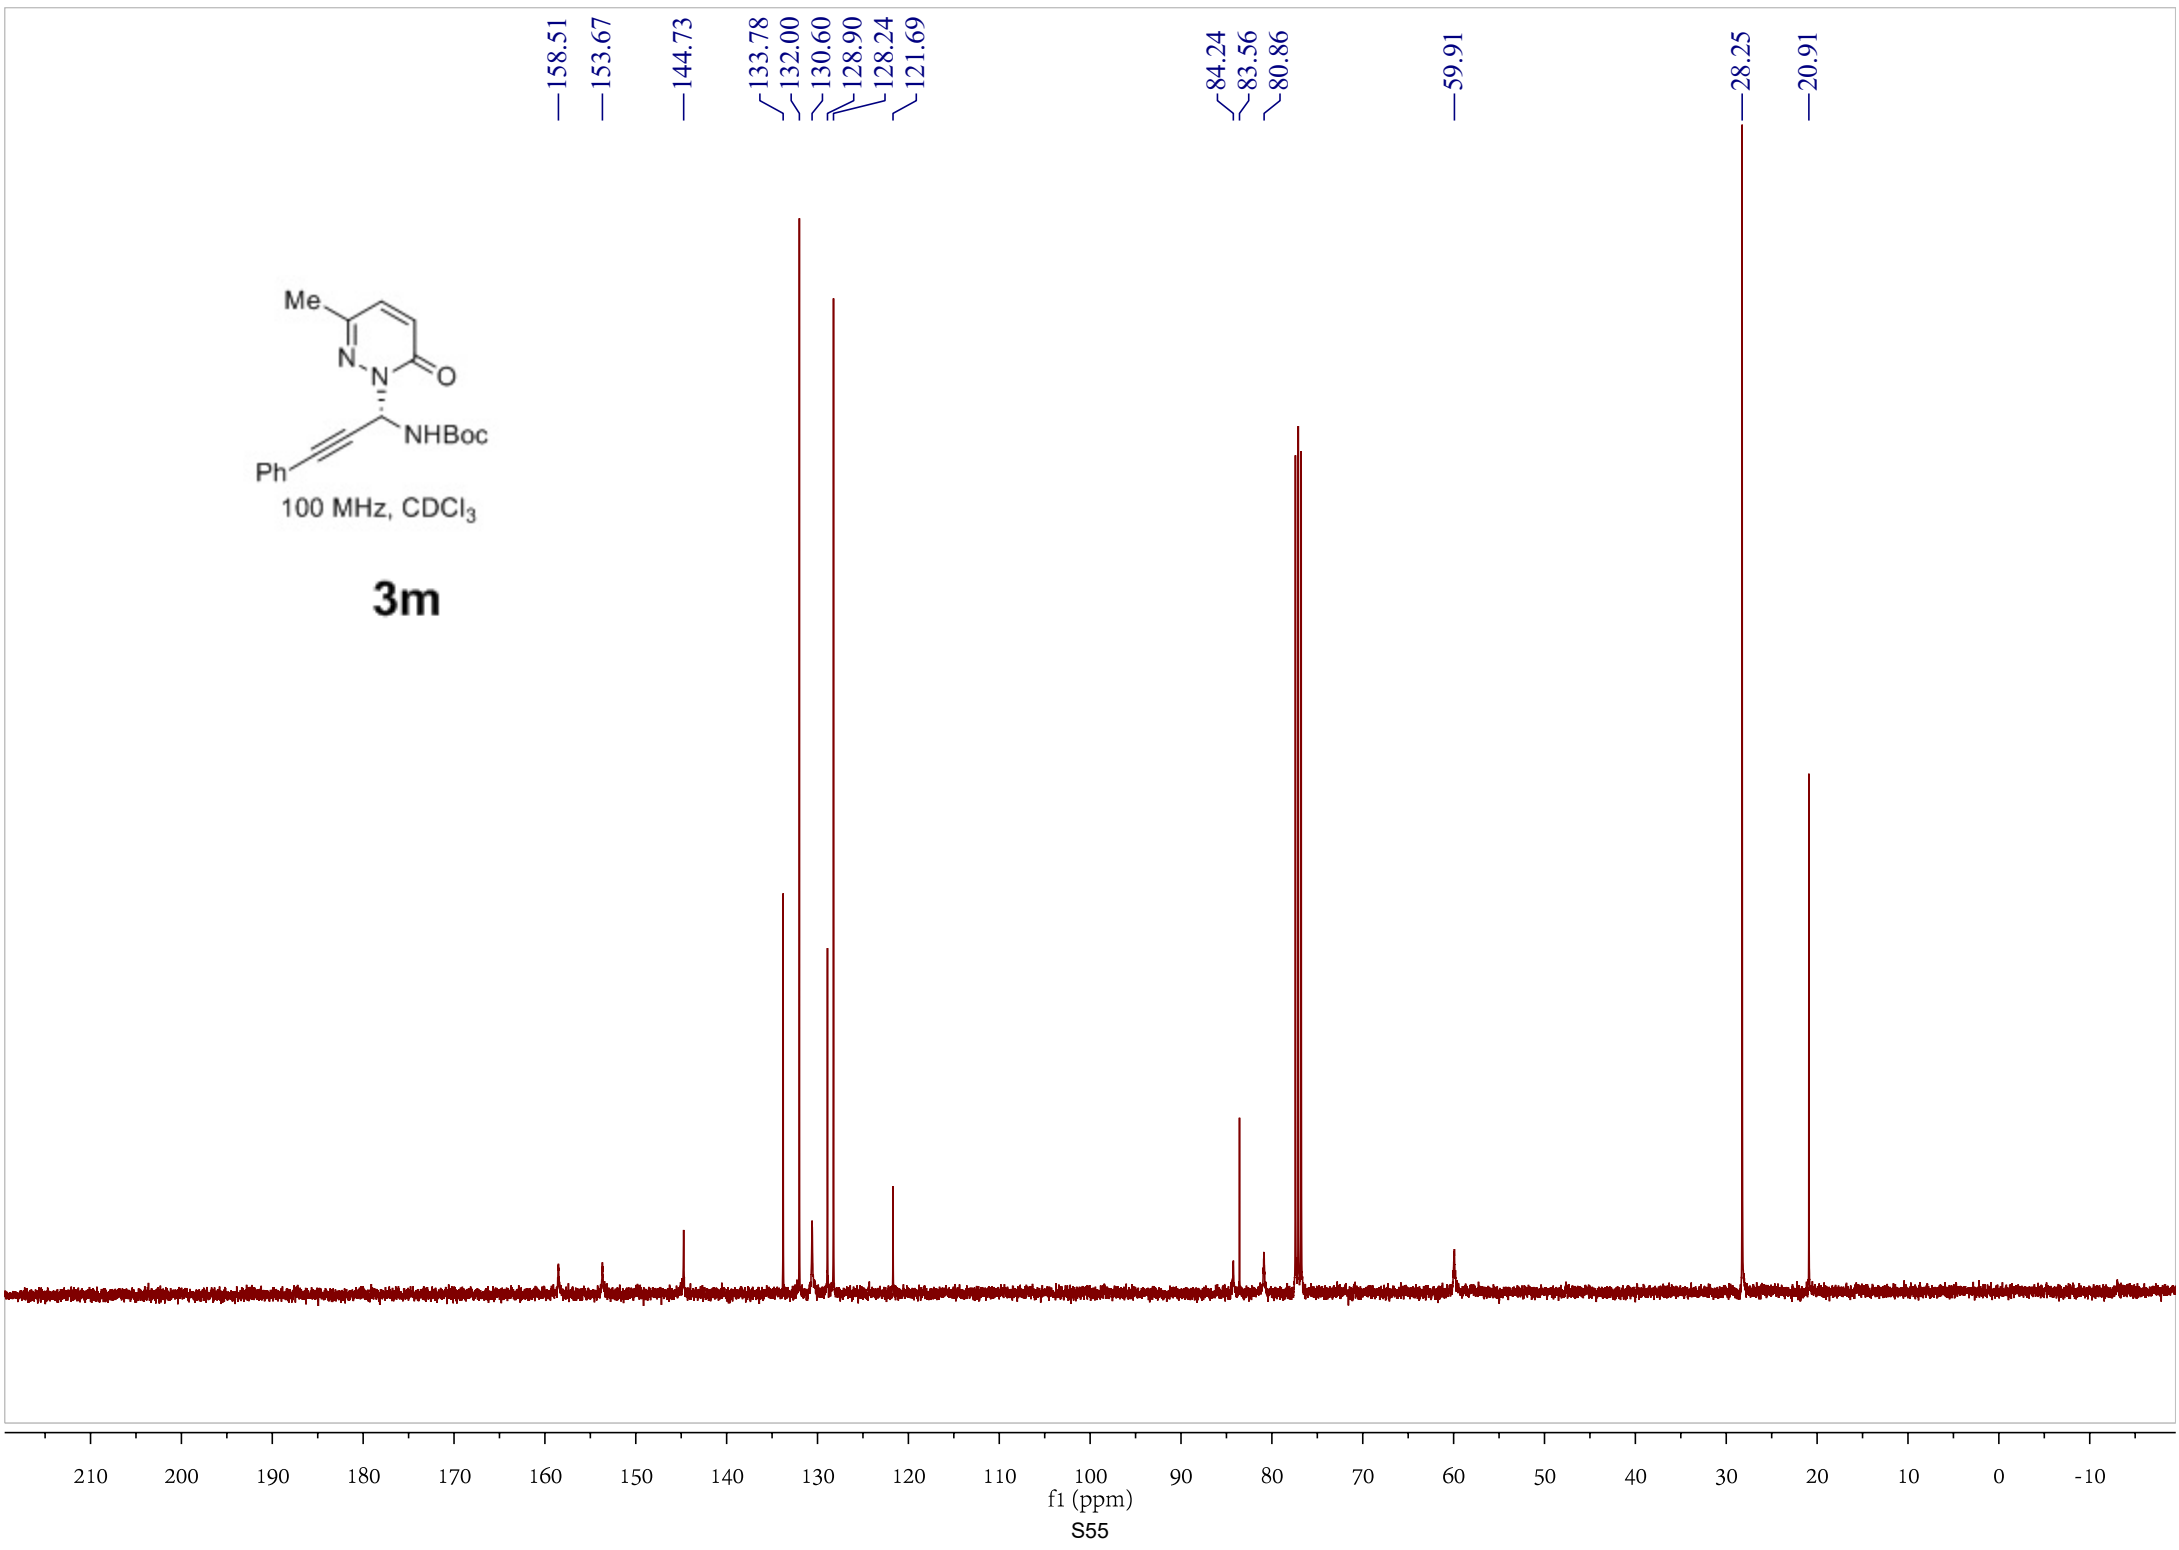

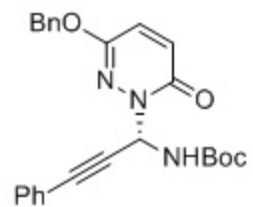

400 MHz, CDCl<sub>3</sub>

**3n**

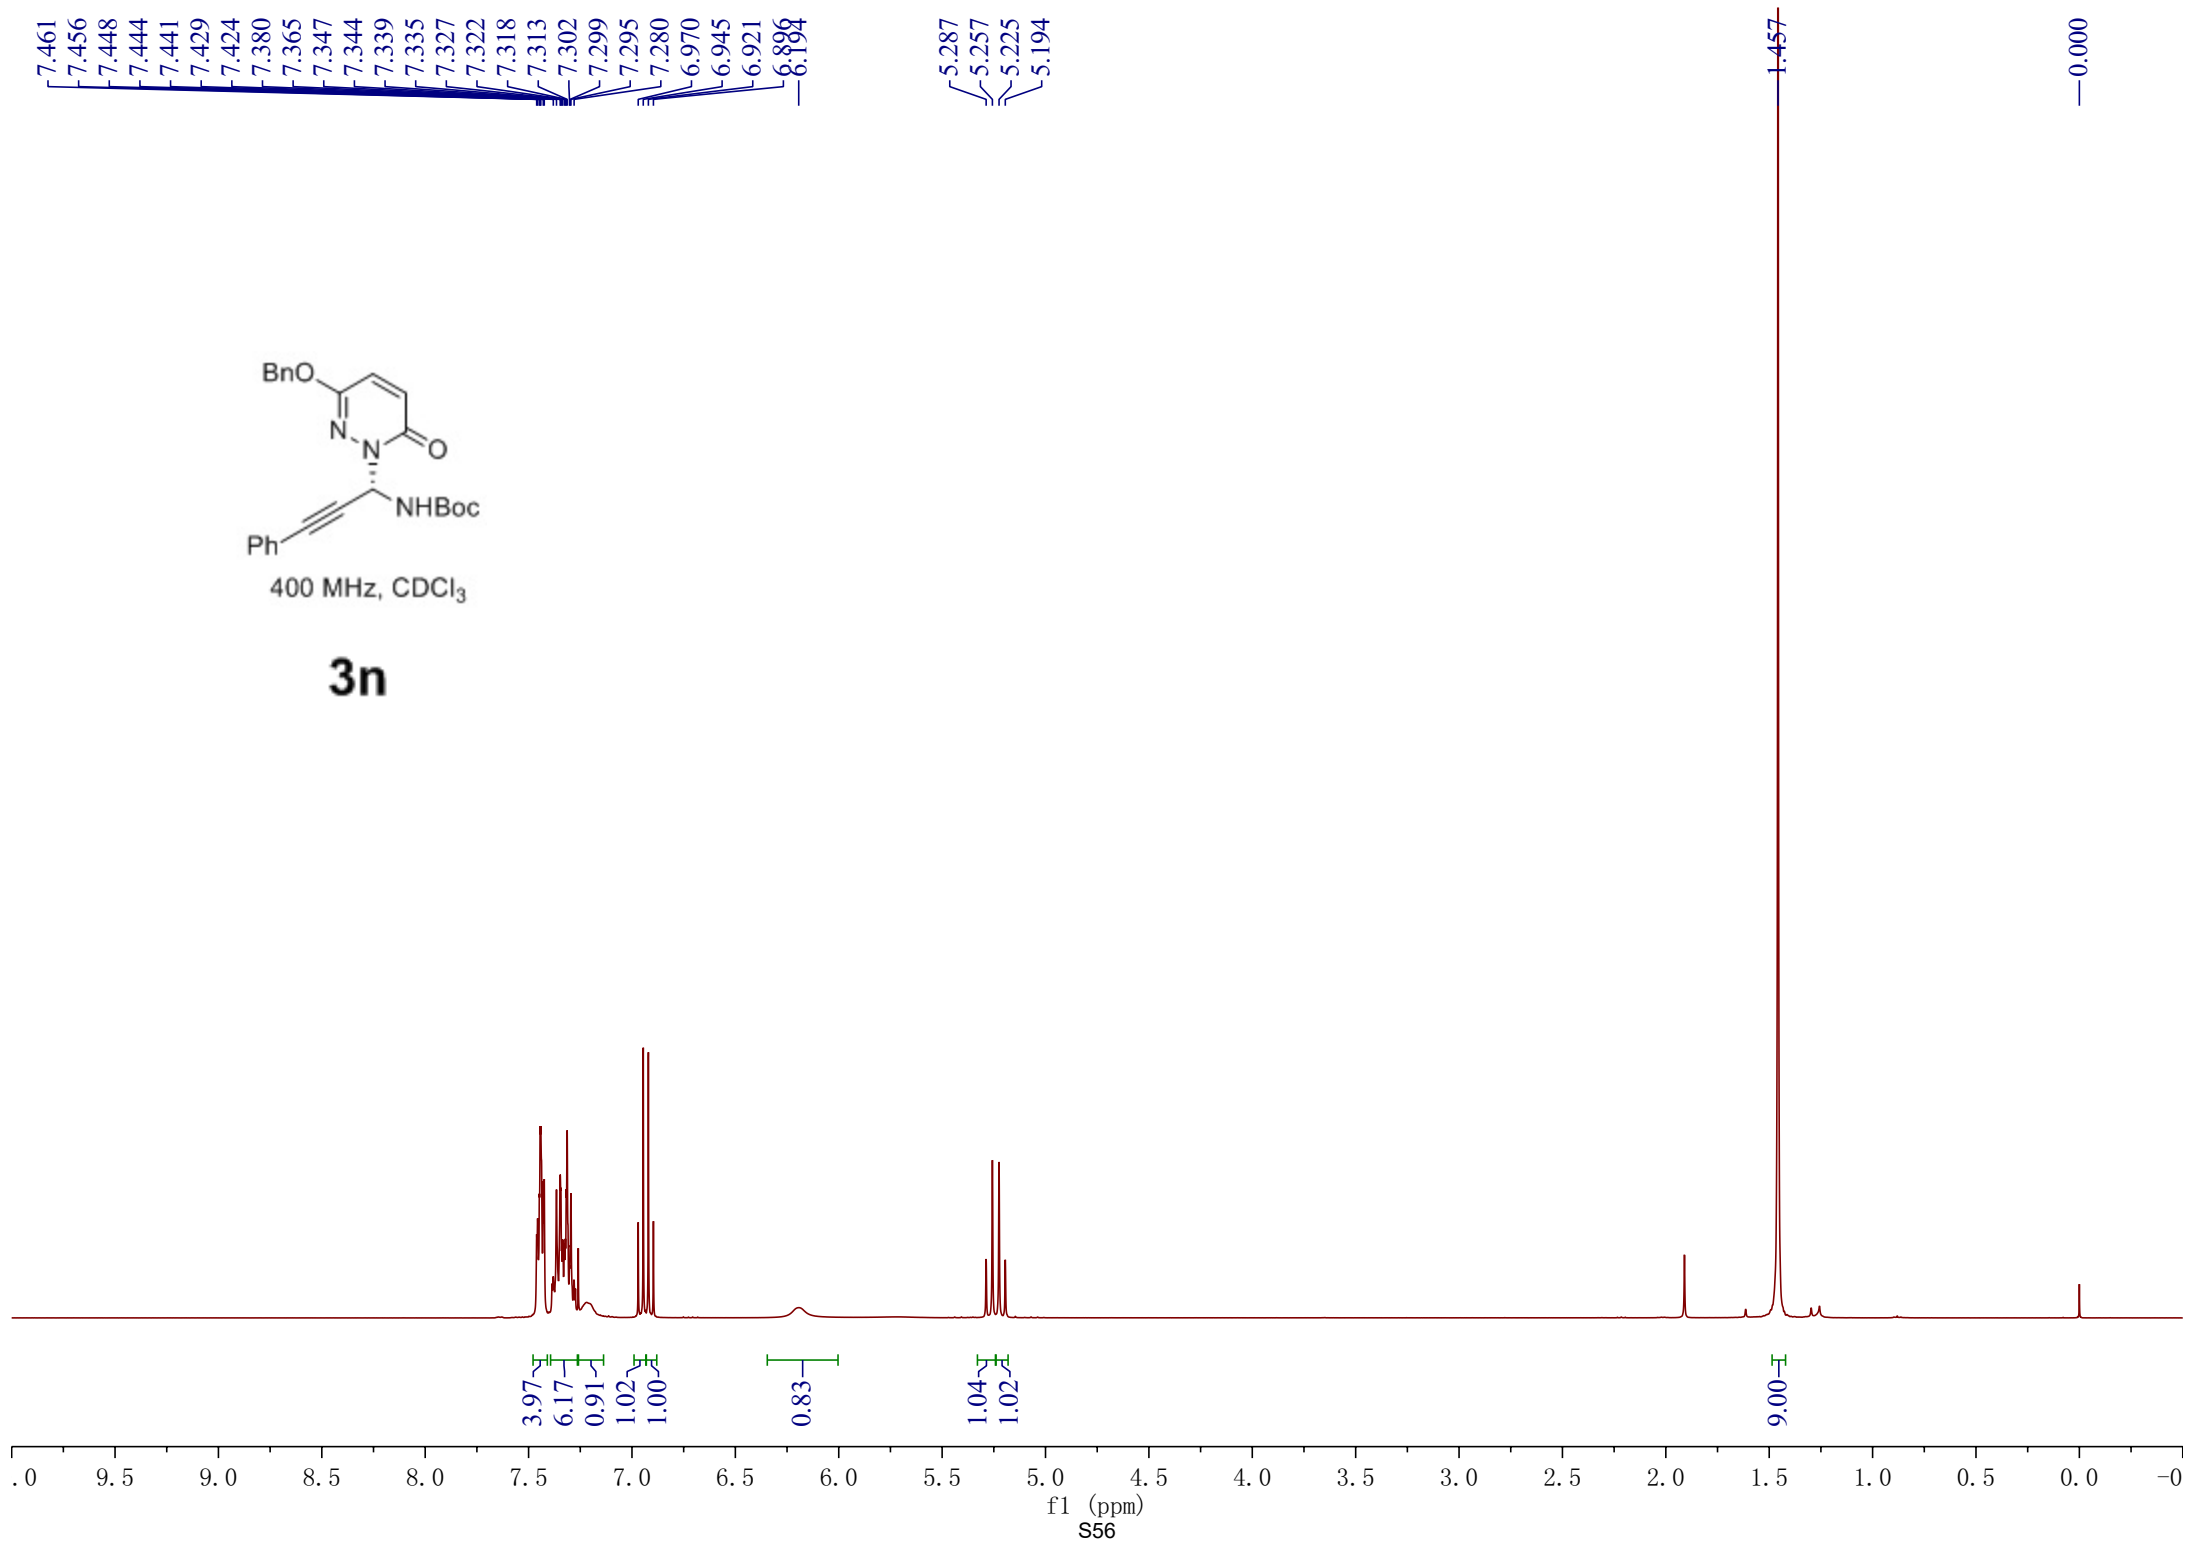

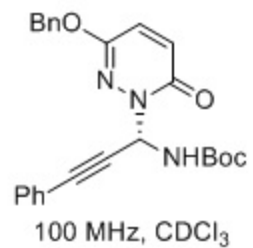

**3n**

157.86  
153.68  
152.44  
135.87  
133.60  
132.08  
129.04  
128.71  
128.52  
128.38  
127.48  
121.76  
84.40  
83.64  
81.03  
69.25  
58.93  
28.36

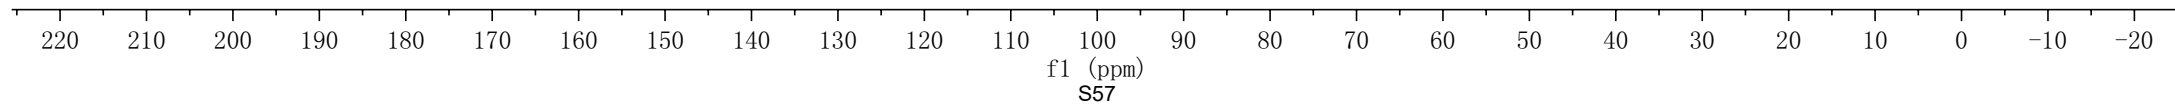

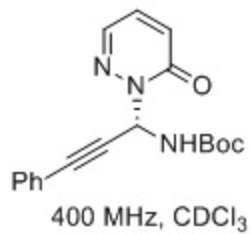

**3o**

7.821  
7.817  
7.812  
7.808  
7.441  
7.425  
7.421  
7.309  
7.304  
7.303  
7.284  
6.958  
6.301

1.442

0.000

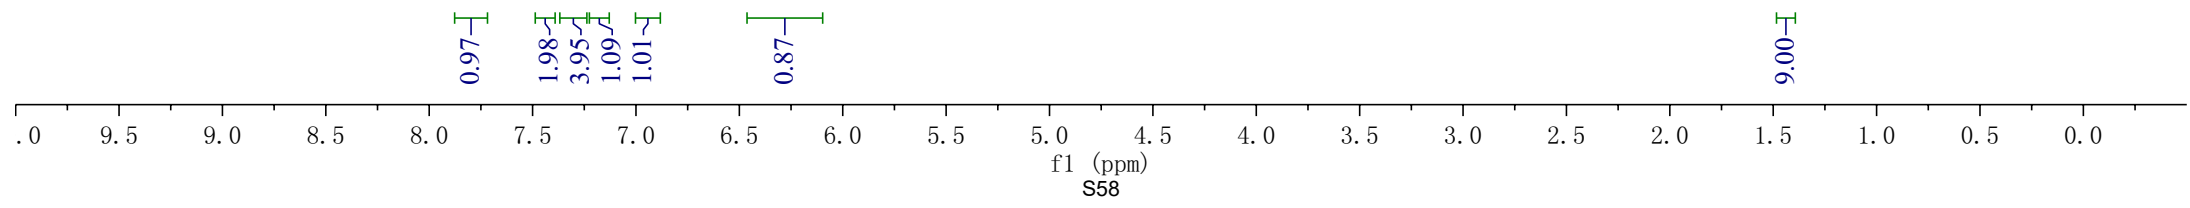

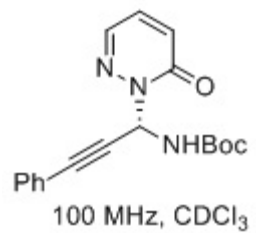

**3o**

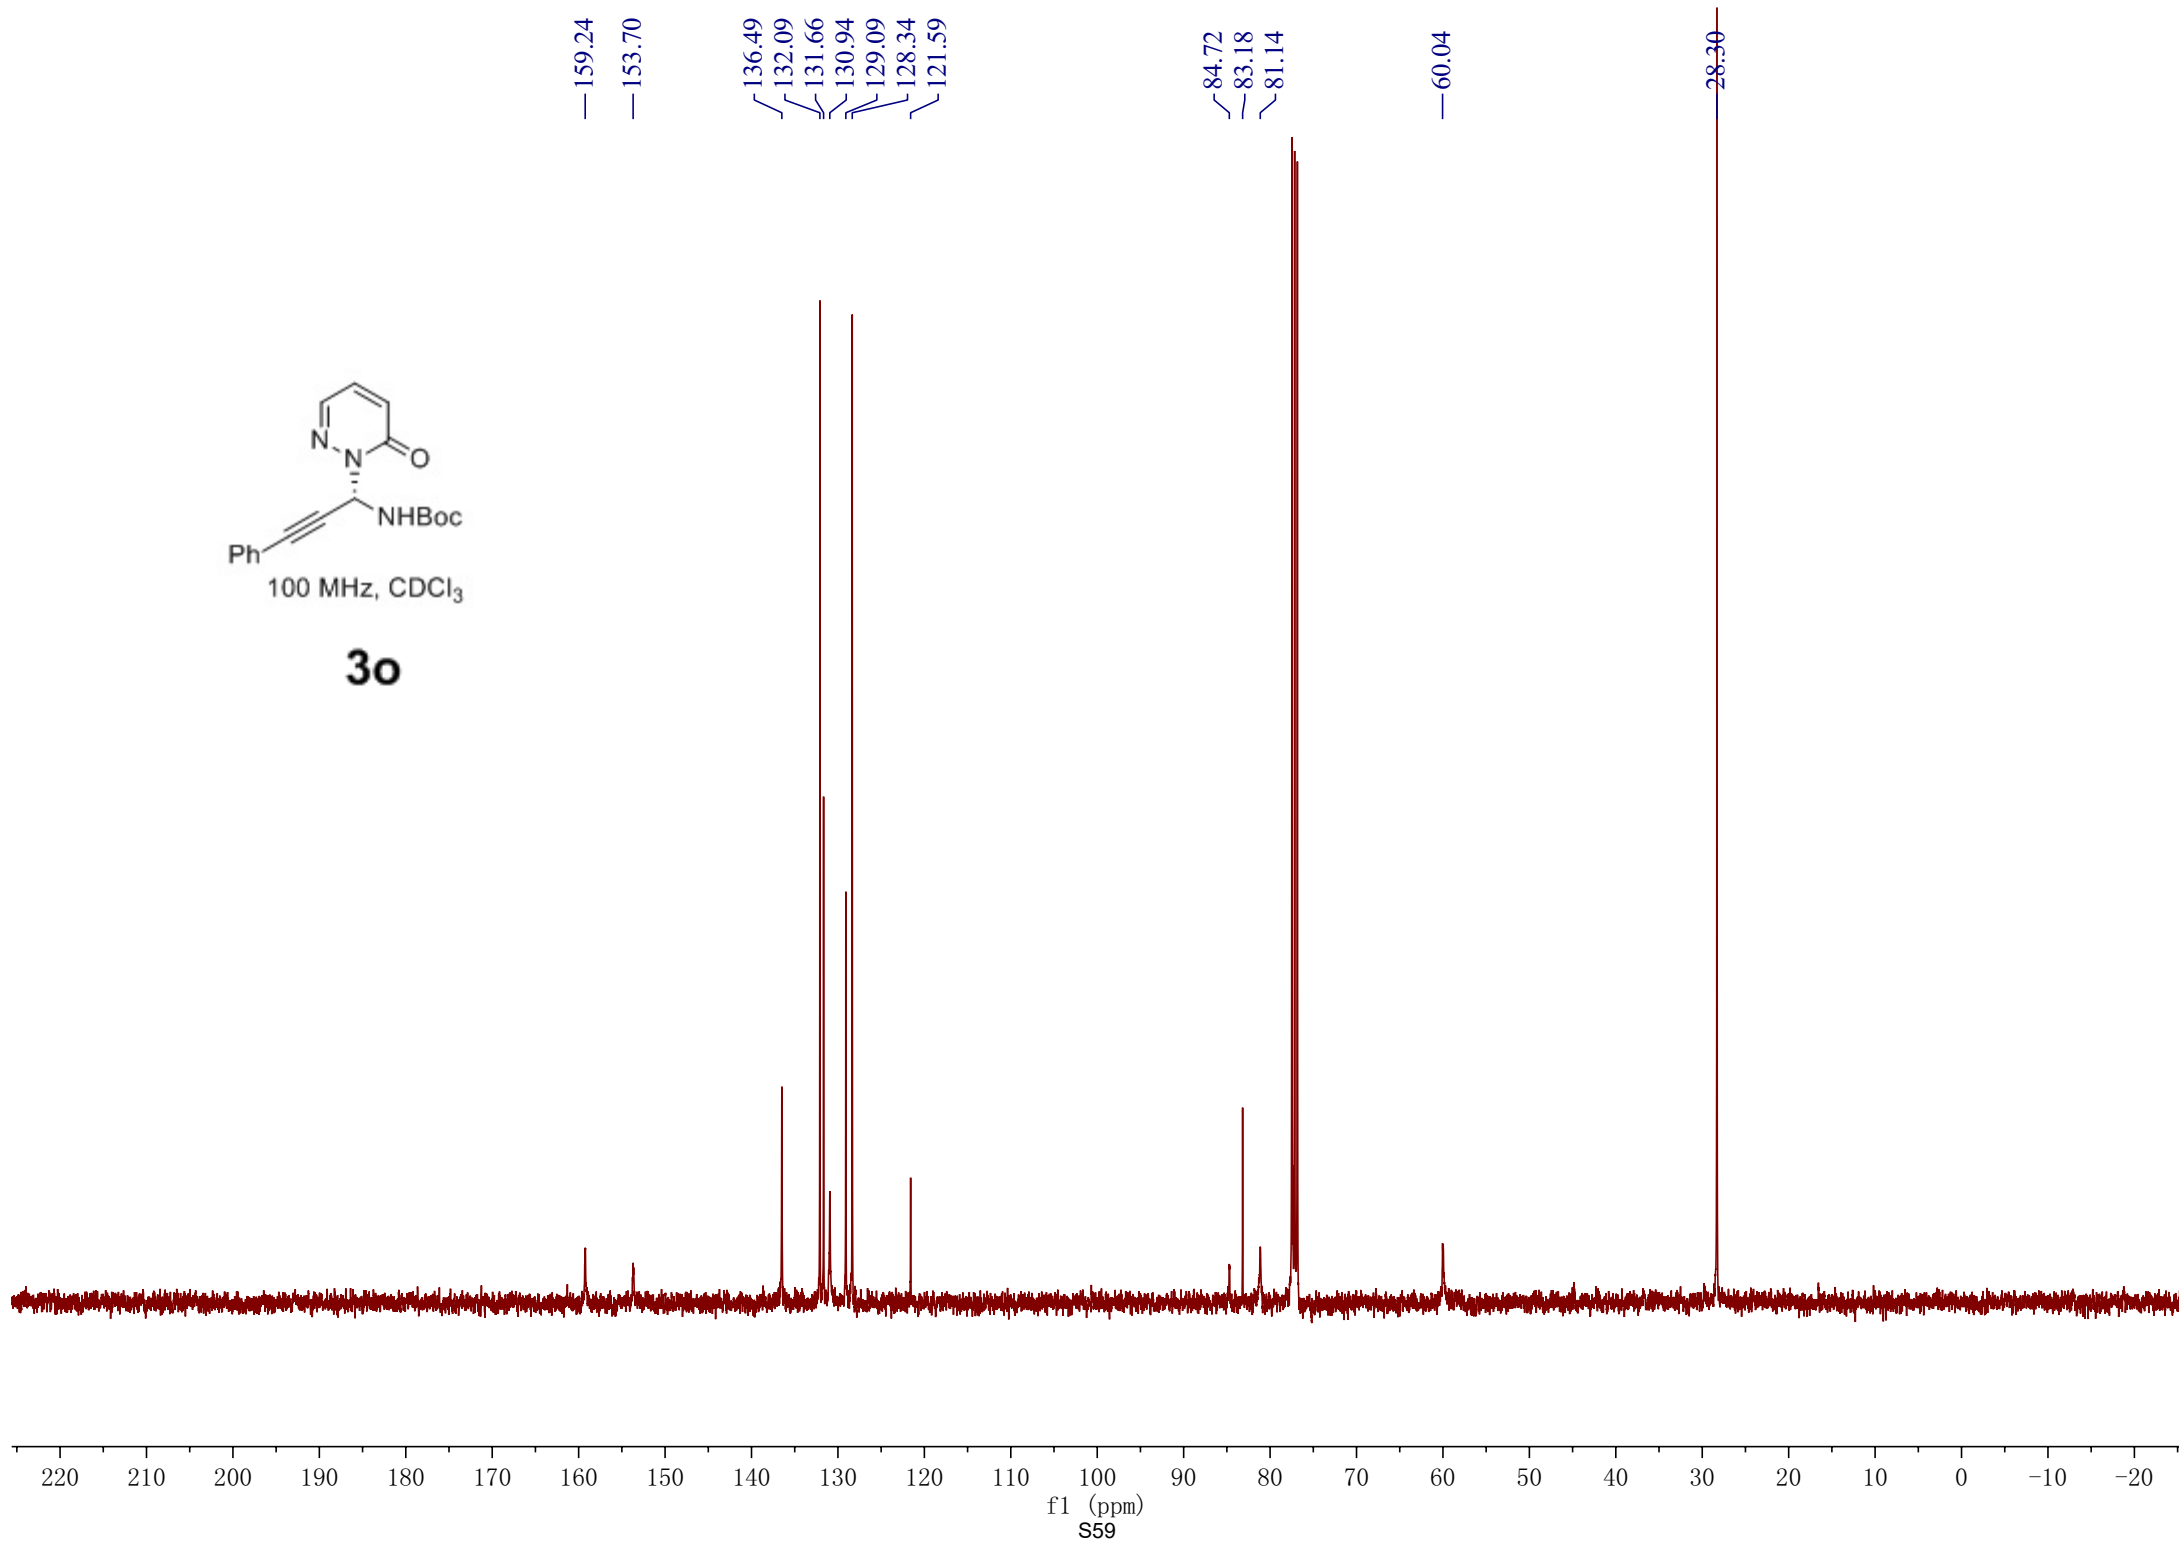

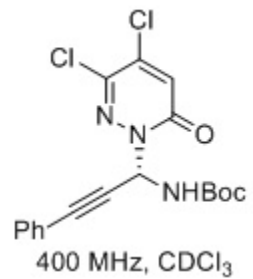

**3p**

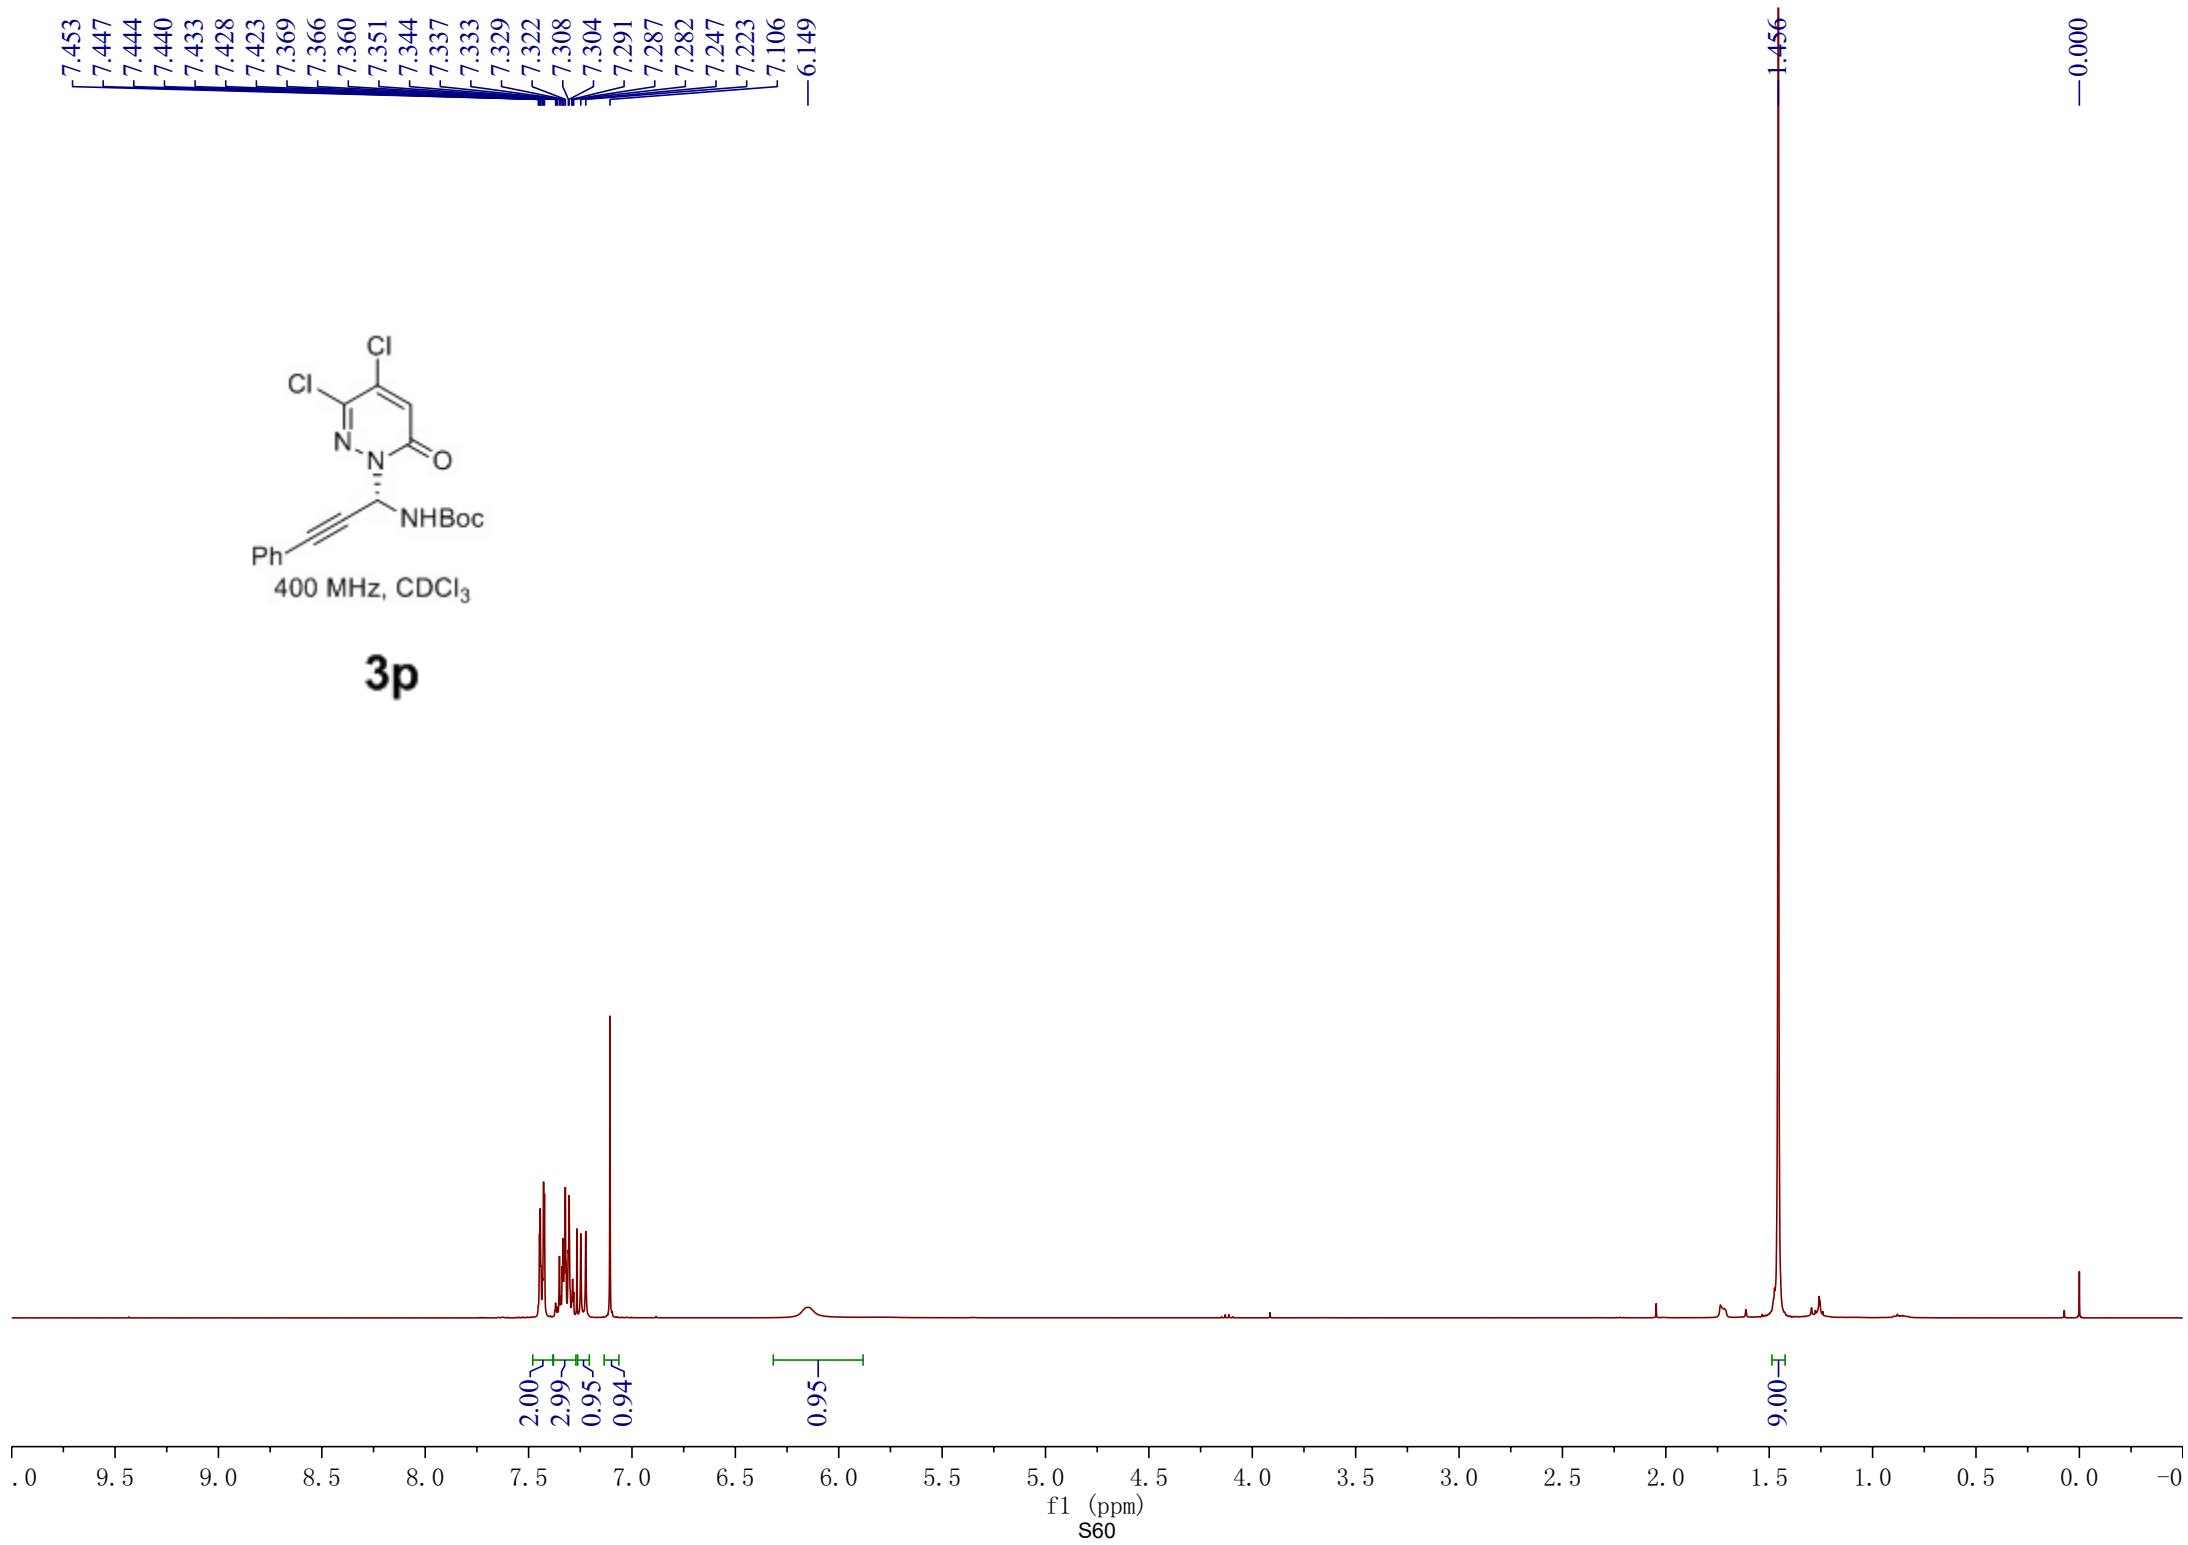

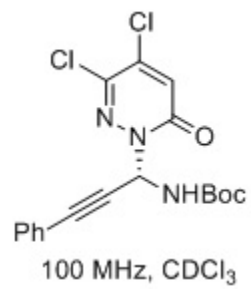

**3p**

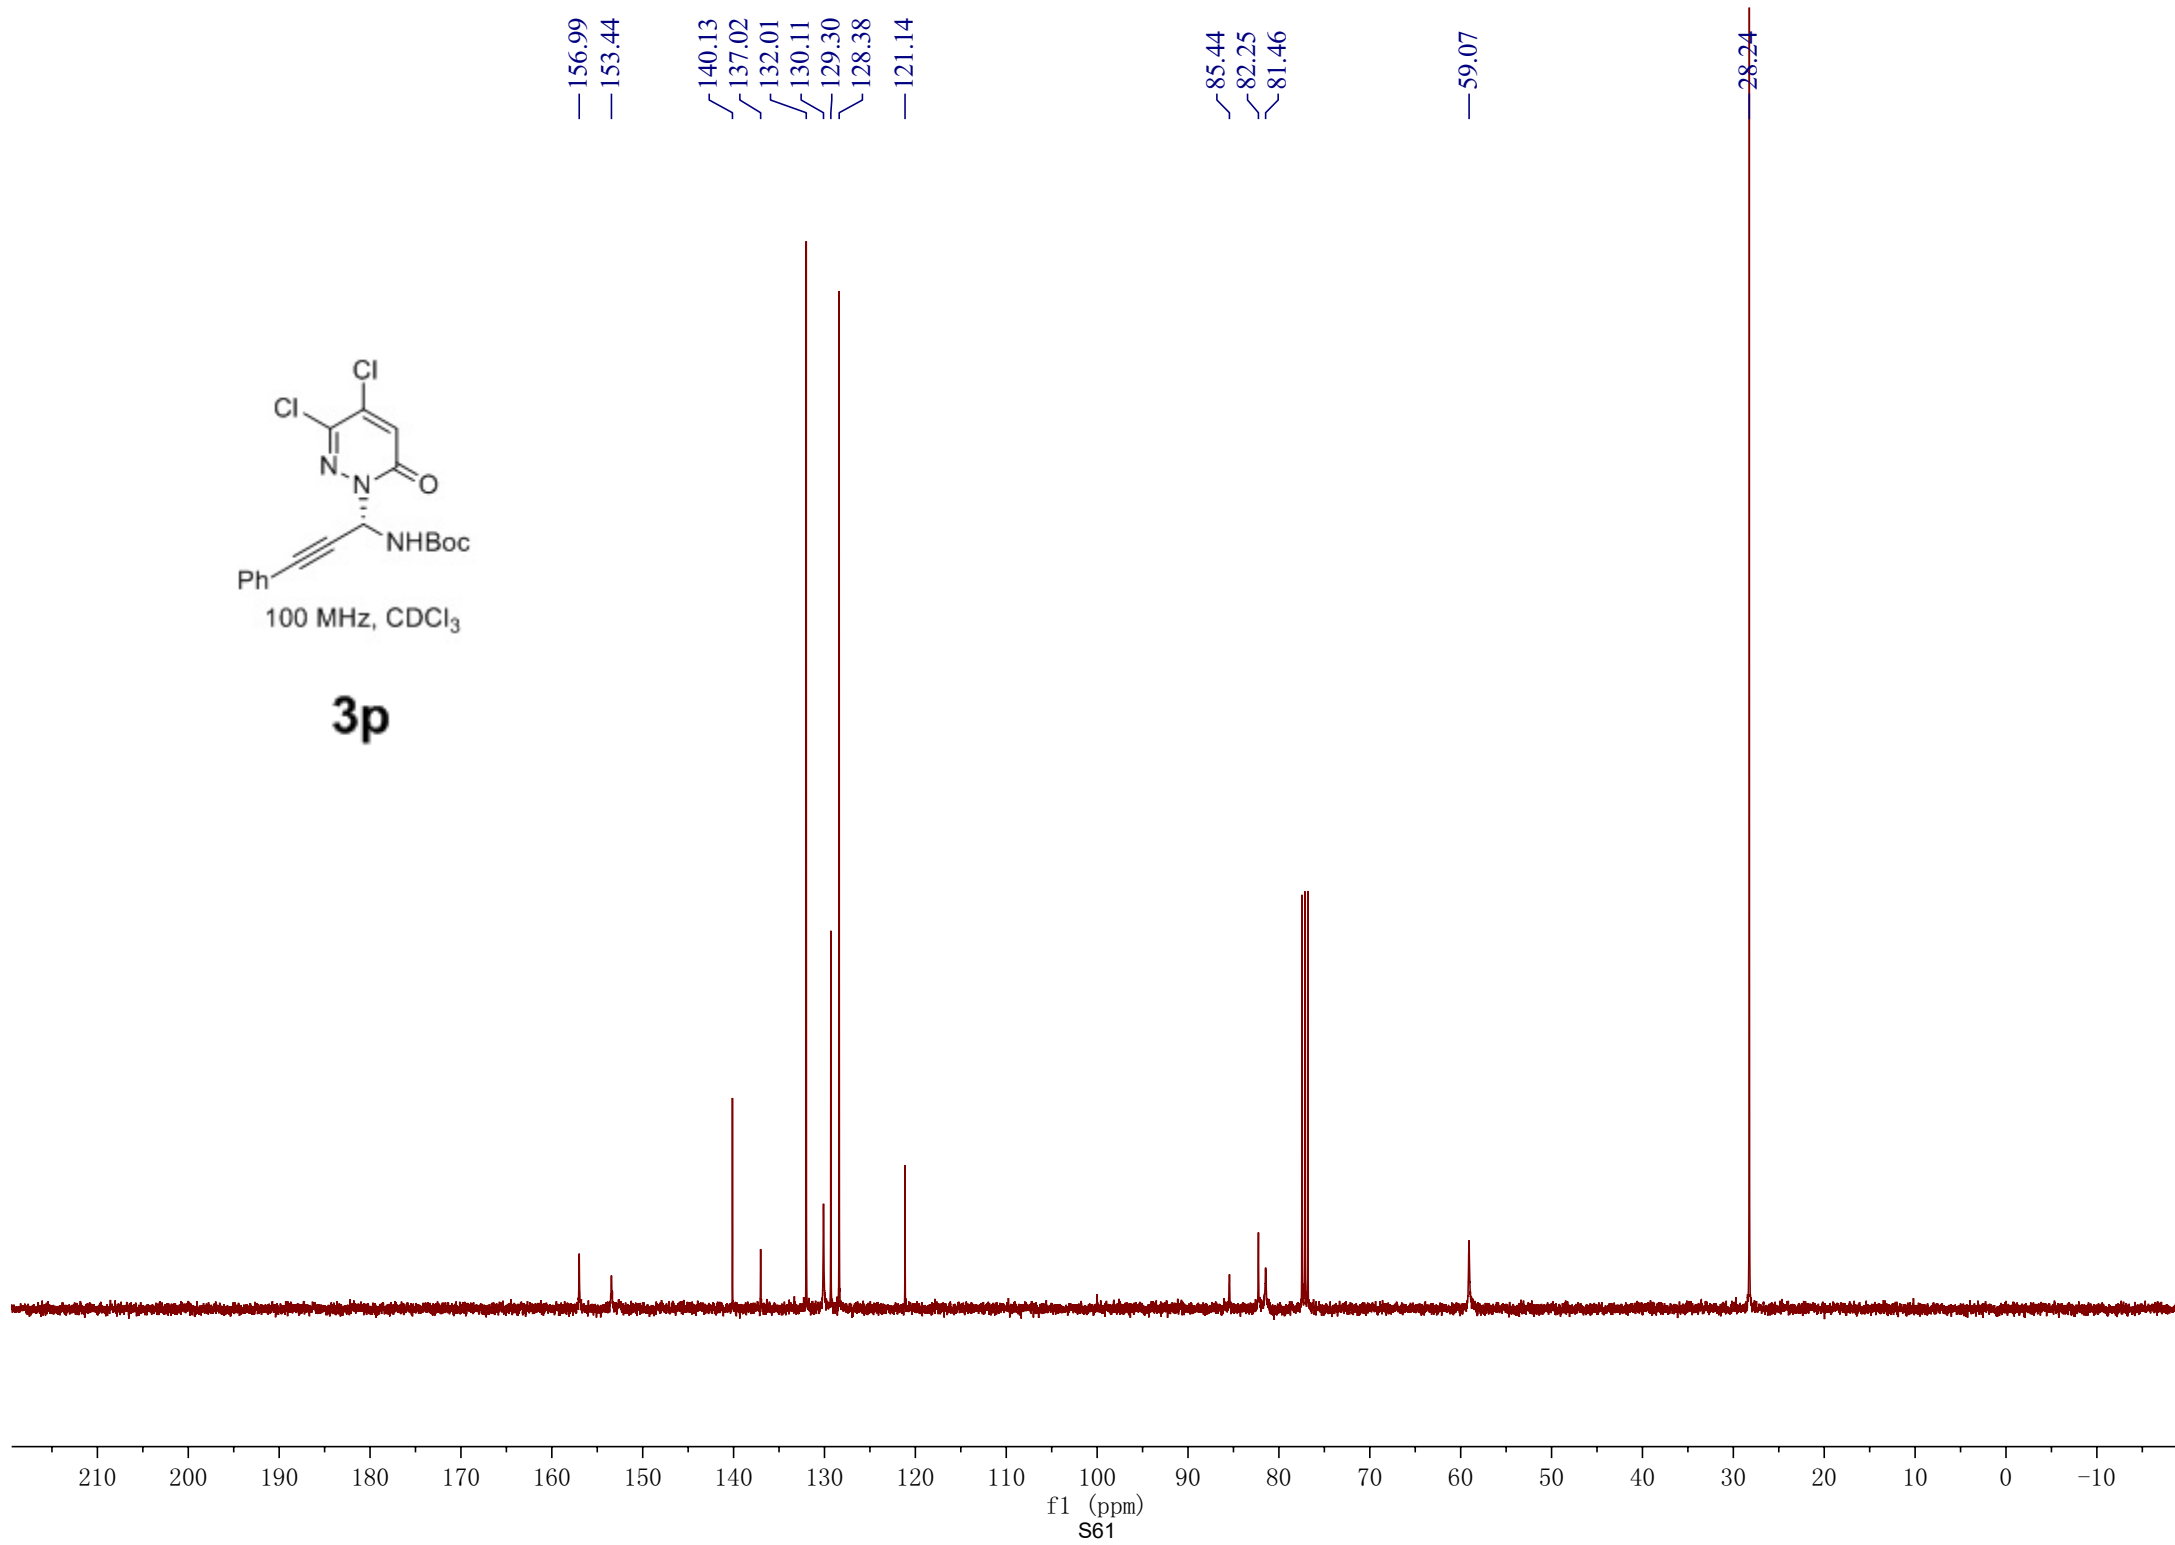

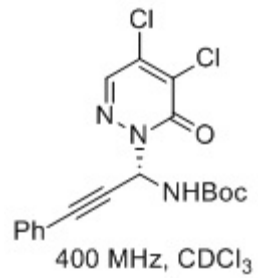

**3q**

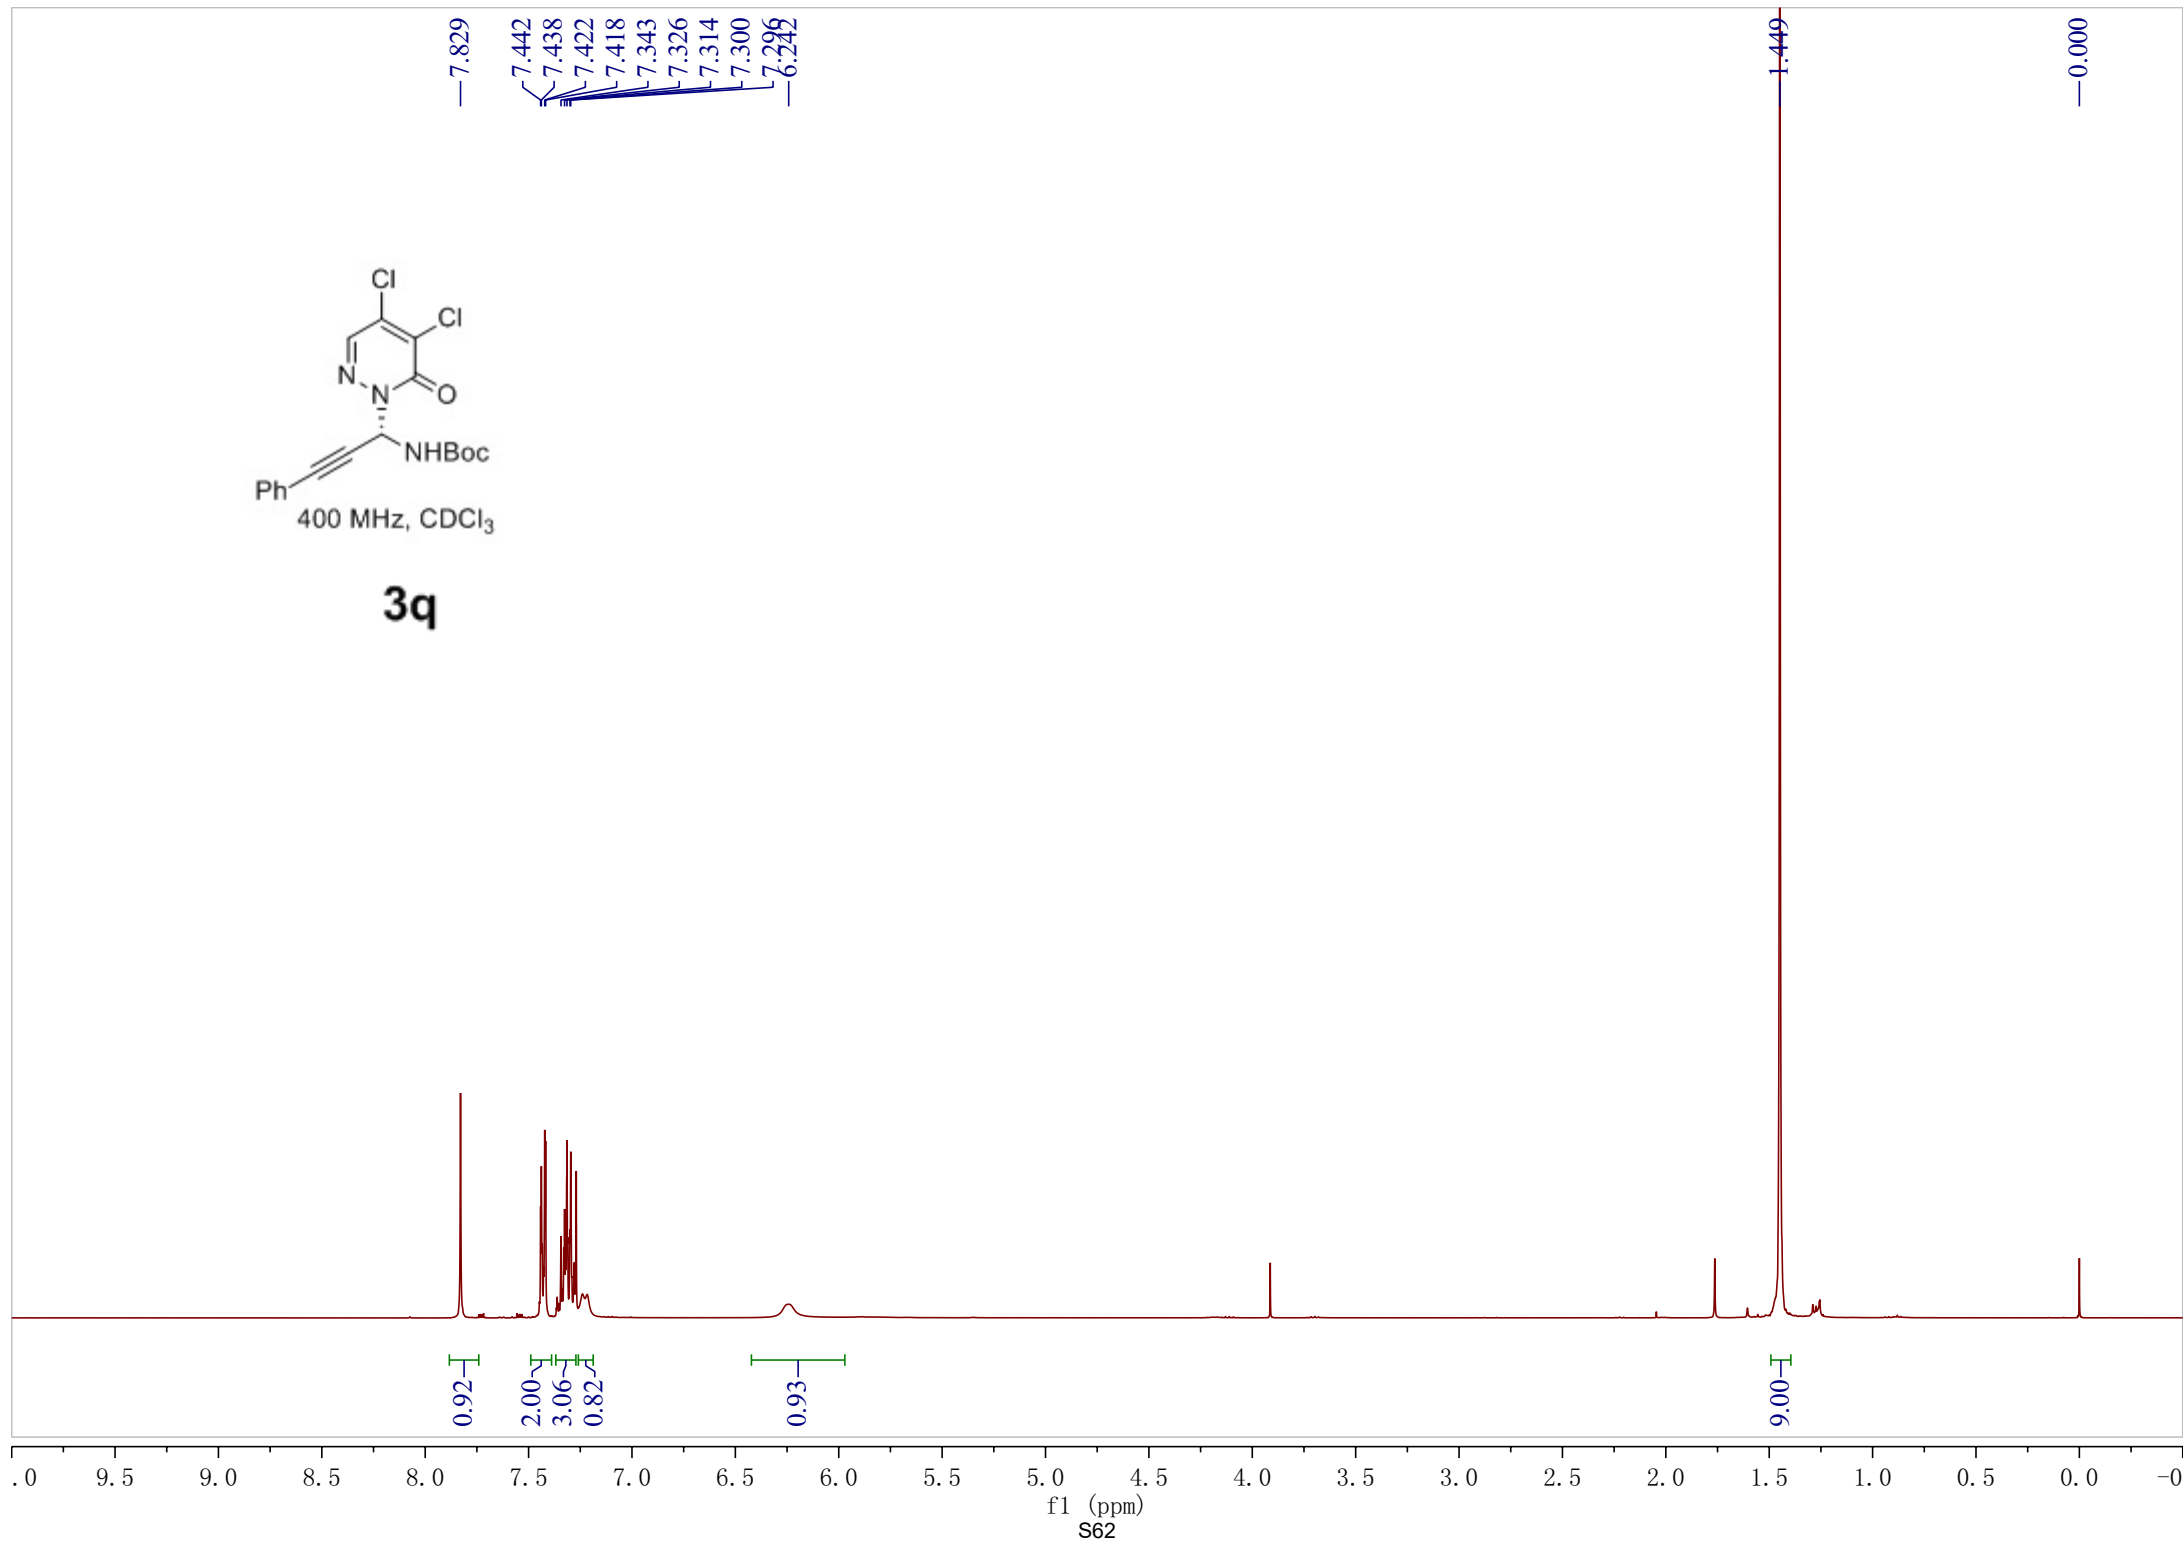



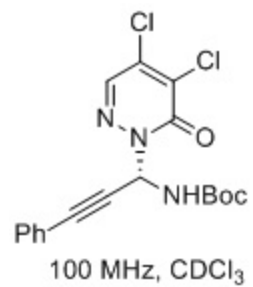

**3q**

155.36  
153.55  
136.99  
136.07  
134.95  
132.09  
129.33  
128.41  
121.20

85.54  
82.14  
81.54

61.29

28.29

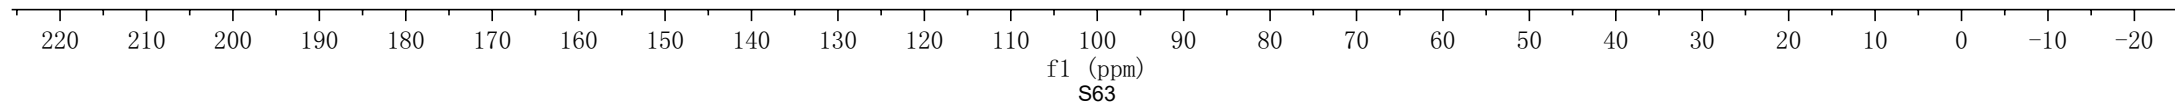

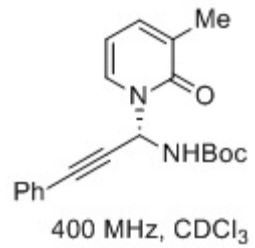

**5a**

7.520  
7.504  
7.445  
7.427  
7.343  
7.325  
7.303  
7.285  
7.271  
7.210  
7.194  
6.757  
6.612  
6.144  
6.127  
6.110

2.166

1.428

0.000

9.0 8.5 8.0 7.5 7.0 6.5 6.0 5.5 5.0 4.5 4.0 3.5 3.0 2.5 2.0 1.5 1.0 0.5 0.0

f1 (ppm)  
S64

0.96  
1.97  
3.12  
1.01

0.96  
0.86

1.02

3.00

9.14

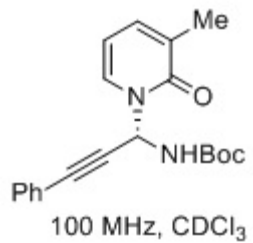

**5a**

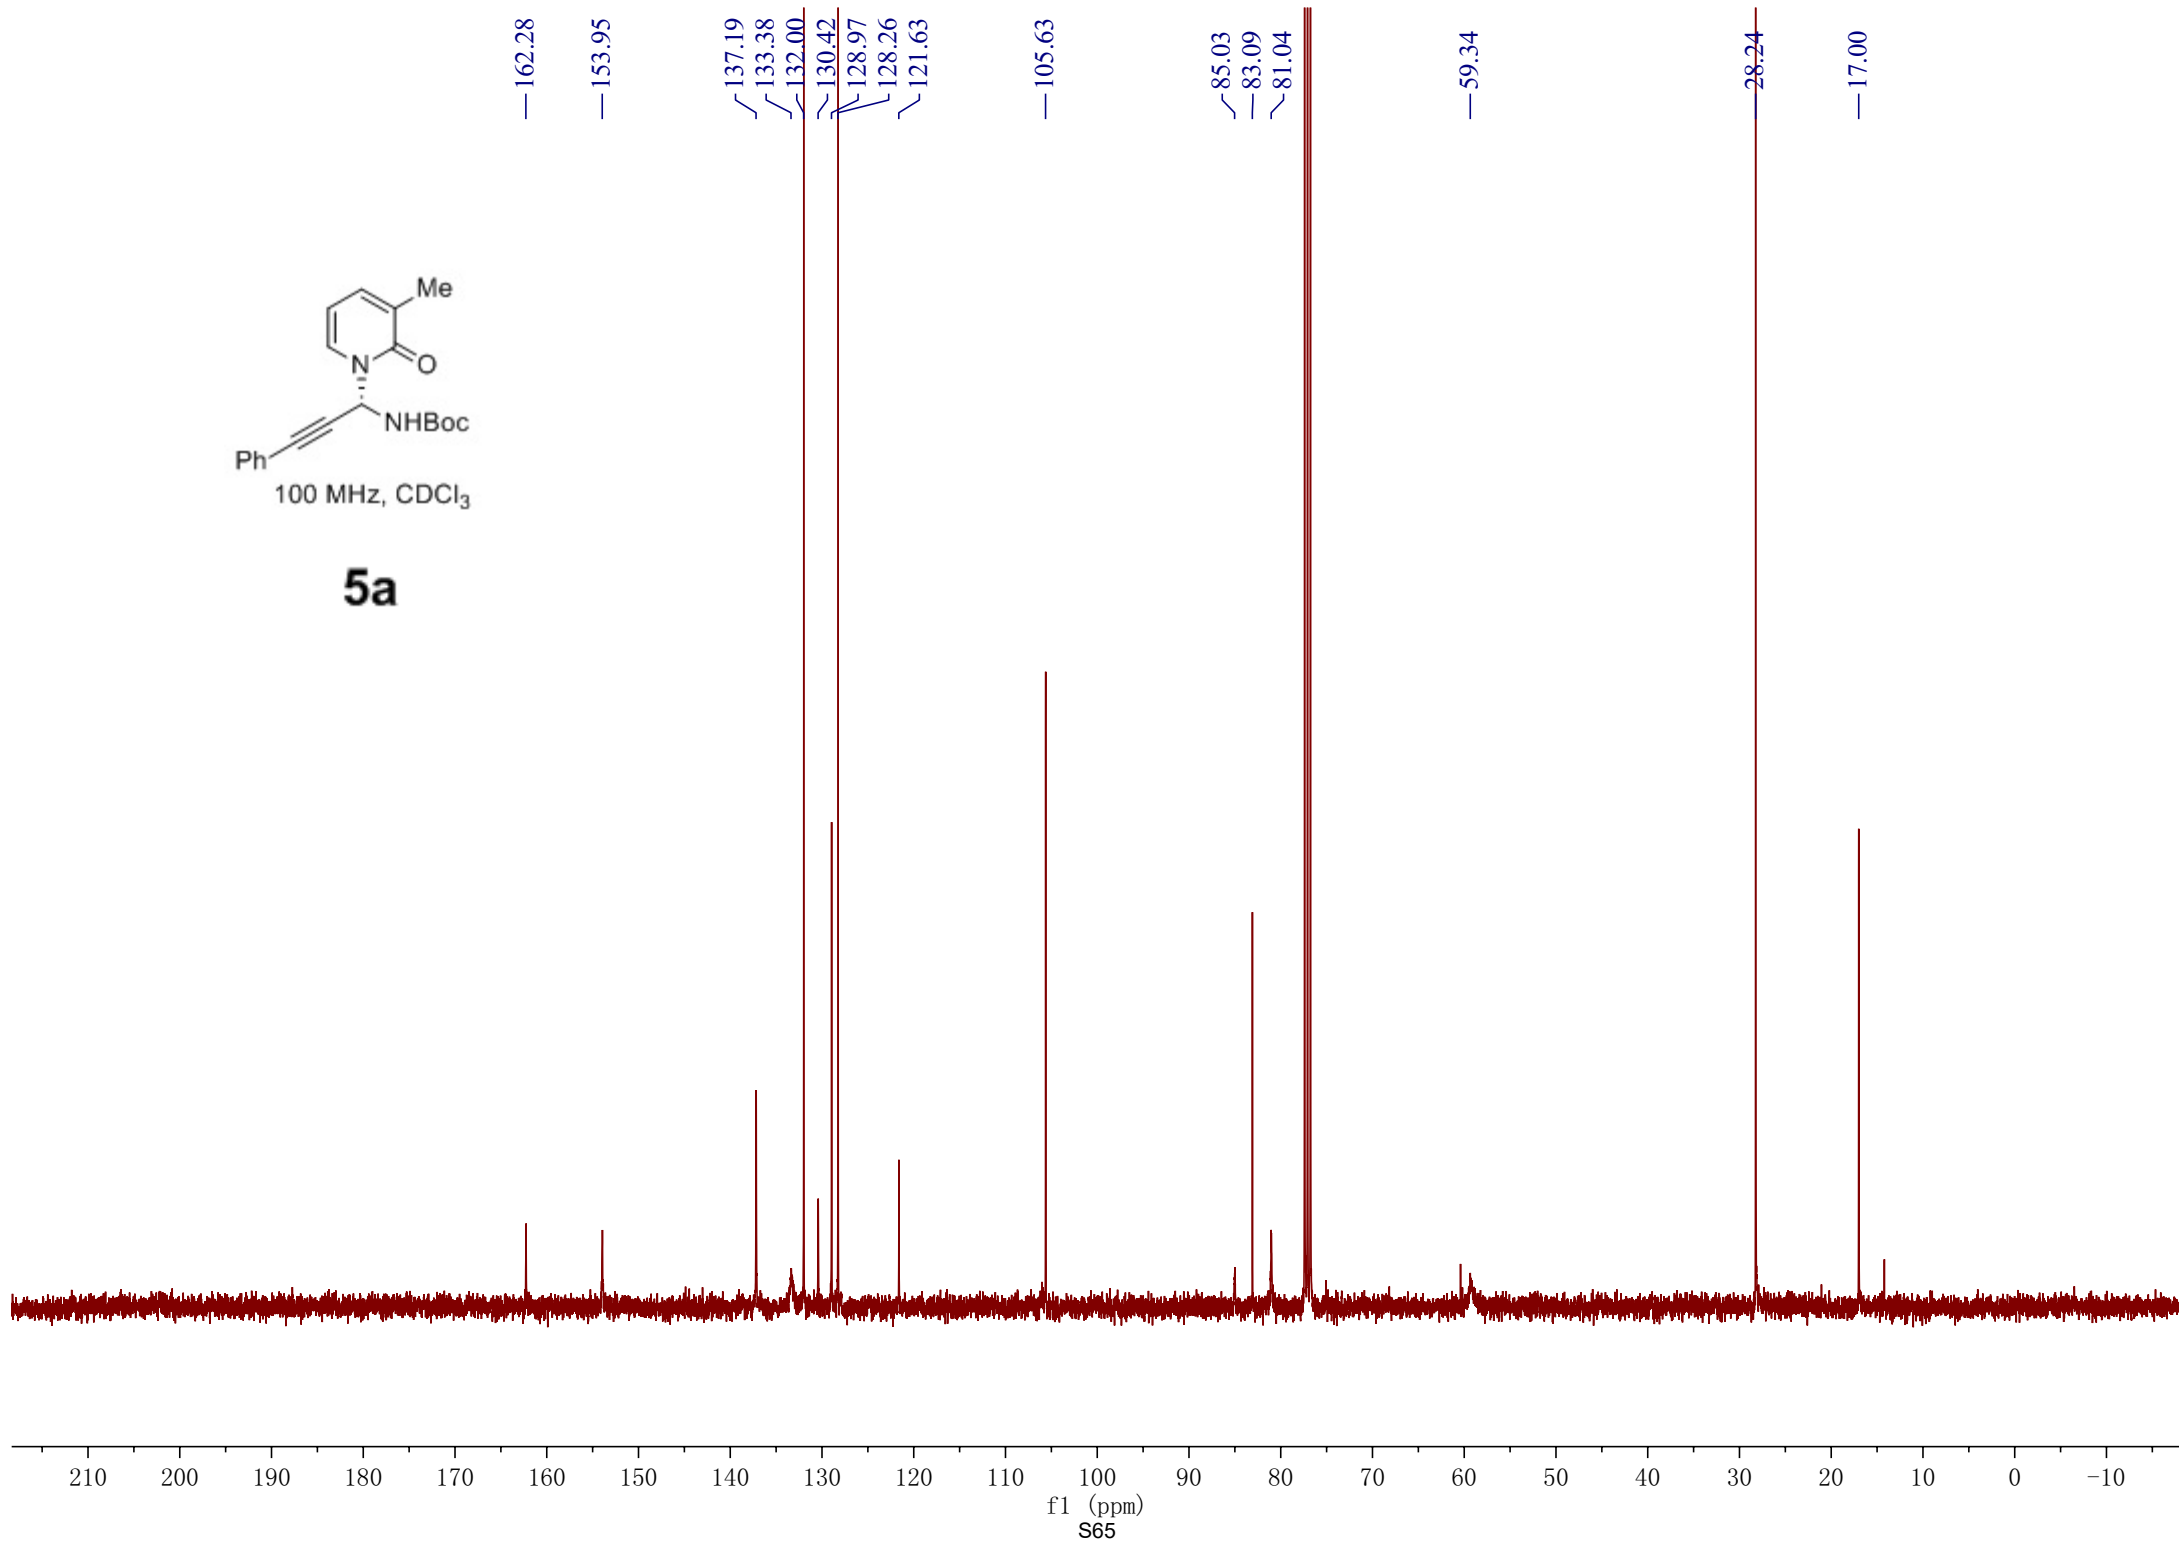

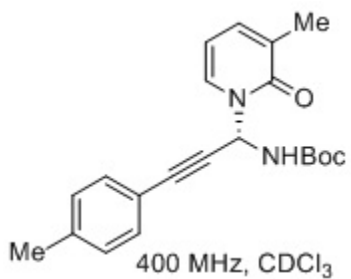

**5b**

7.509  
7.493  
7.339  
7.319  
7.212  
7.209  
7.207  
7.204  
7.195  
7.193  
7.191  
7.188  
7.104  
7.085  
6.753  
6.537  
6.140  
6.123  
6.106

2.331  
2.164

1.424

0.000

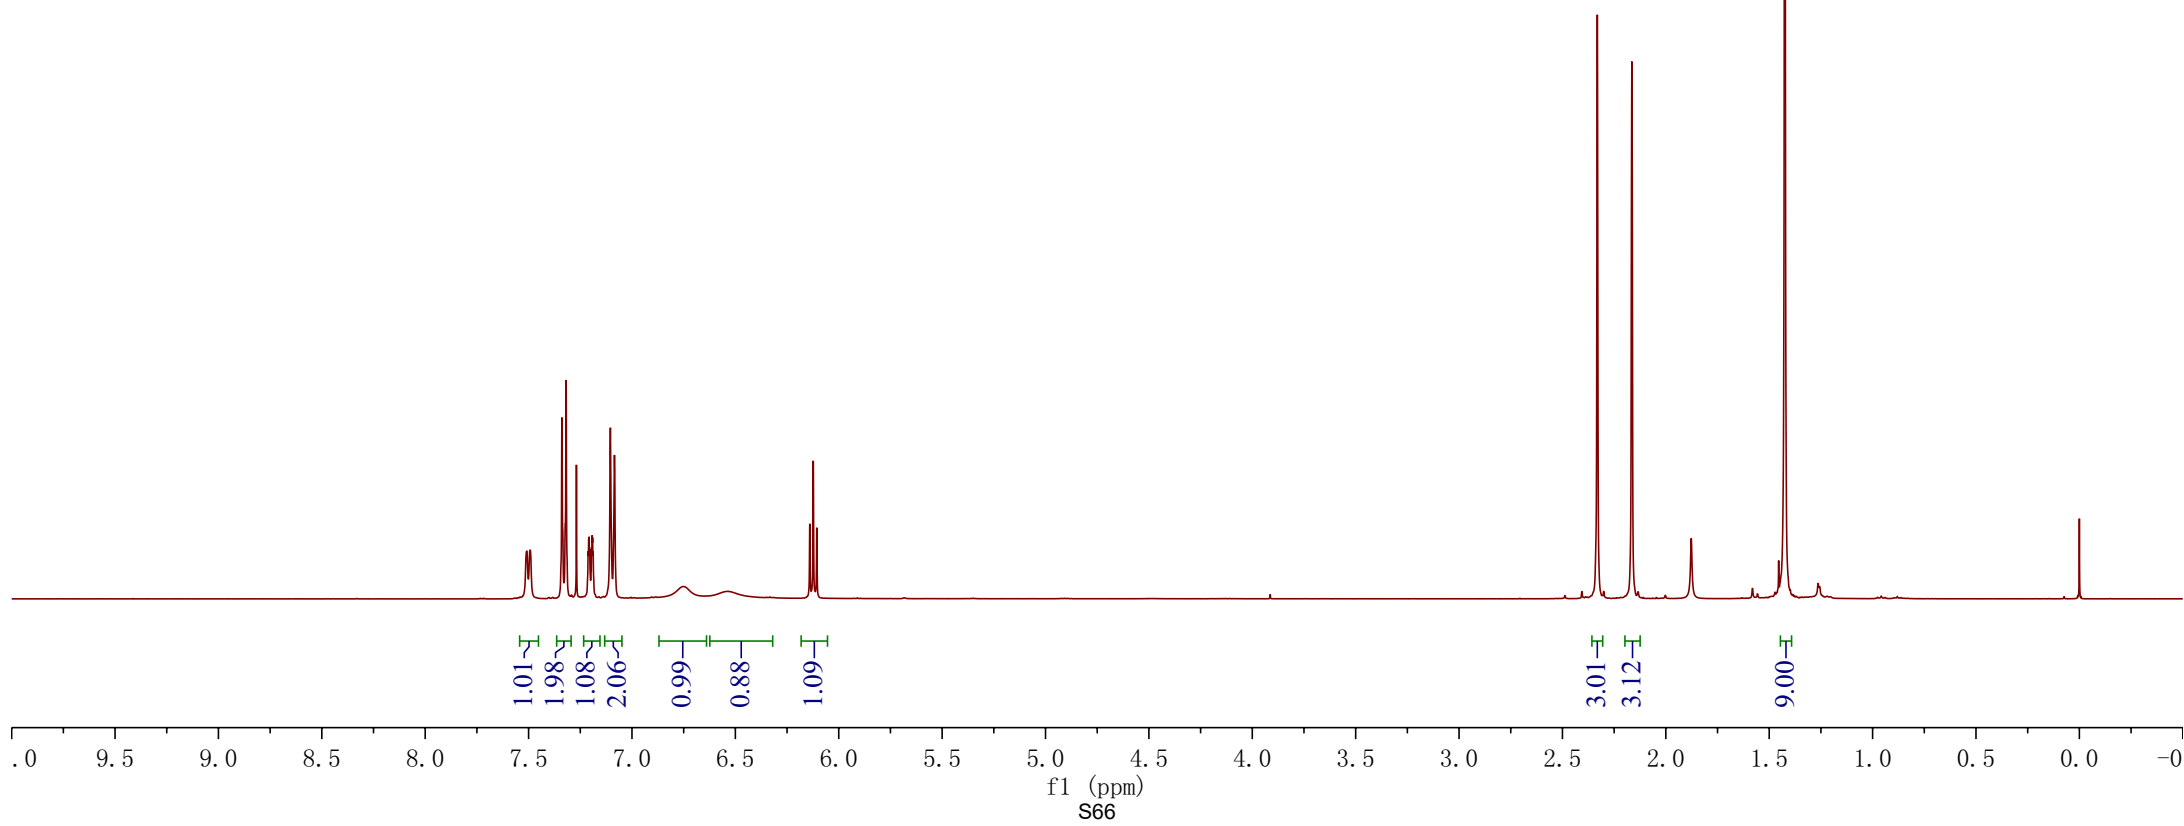

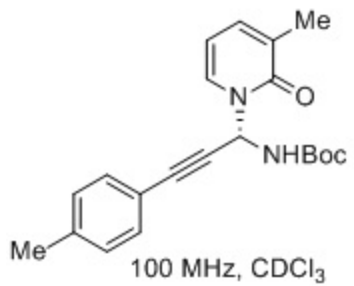

**5b**

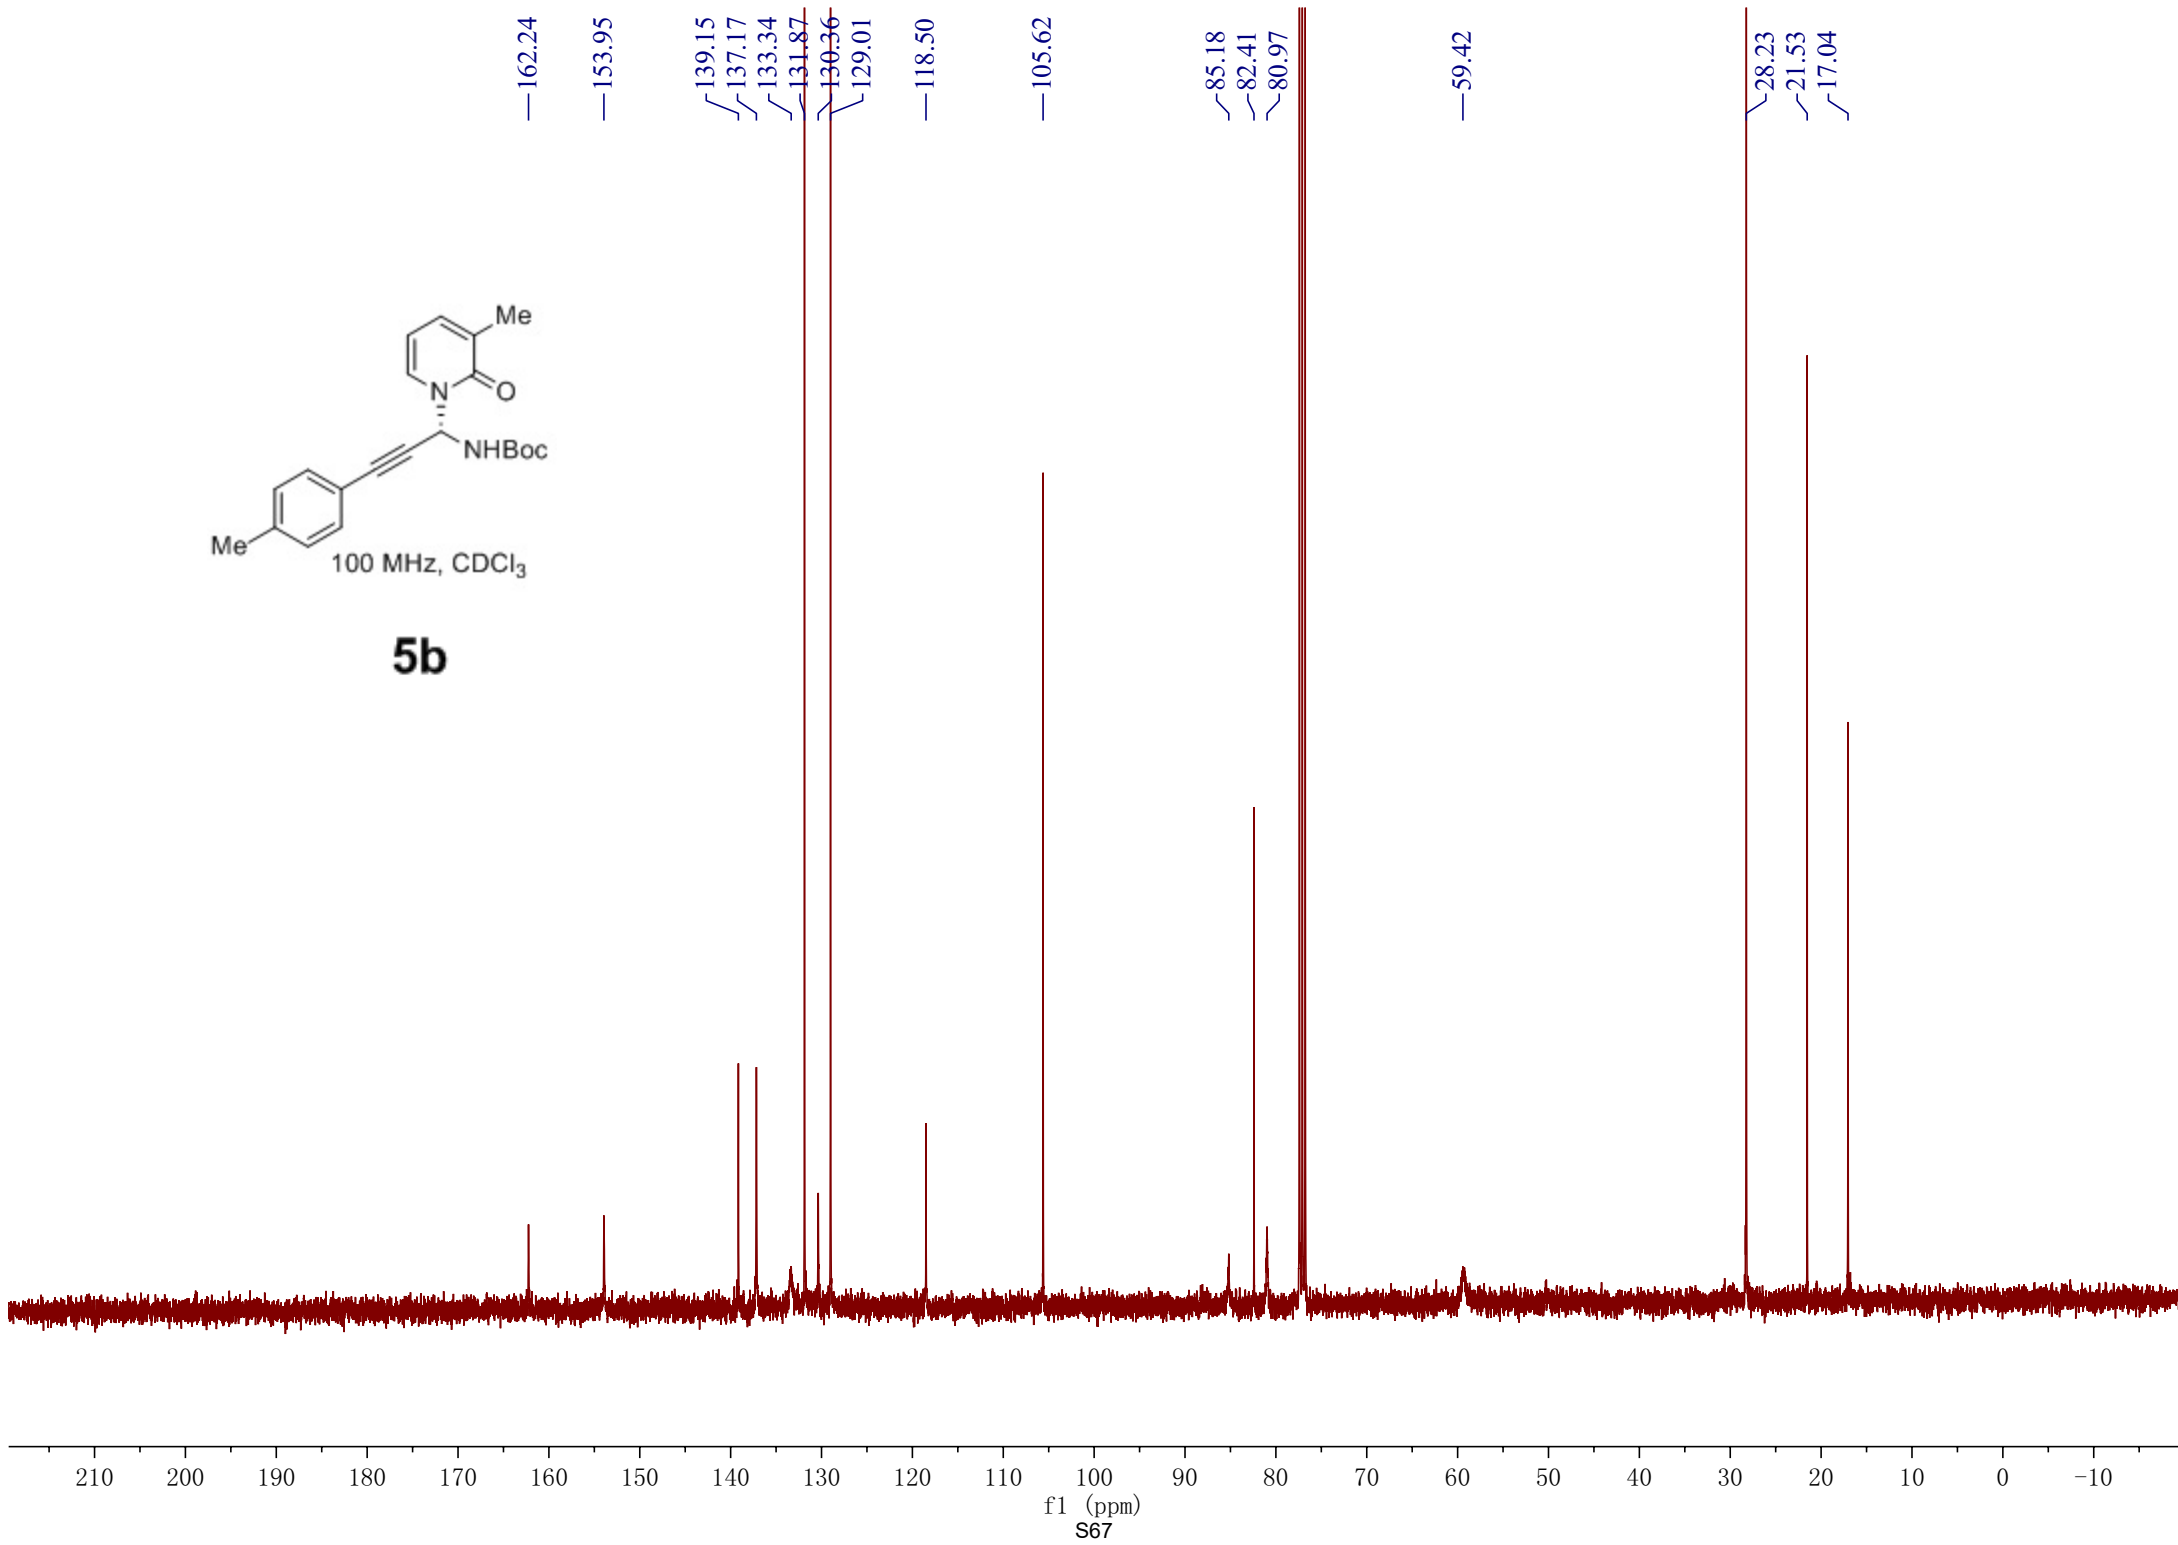

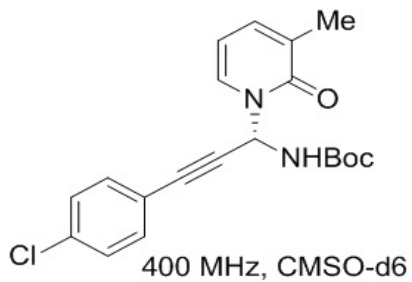

**5c**

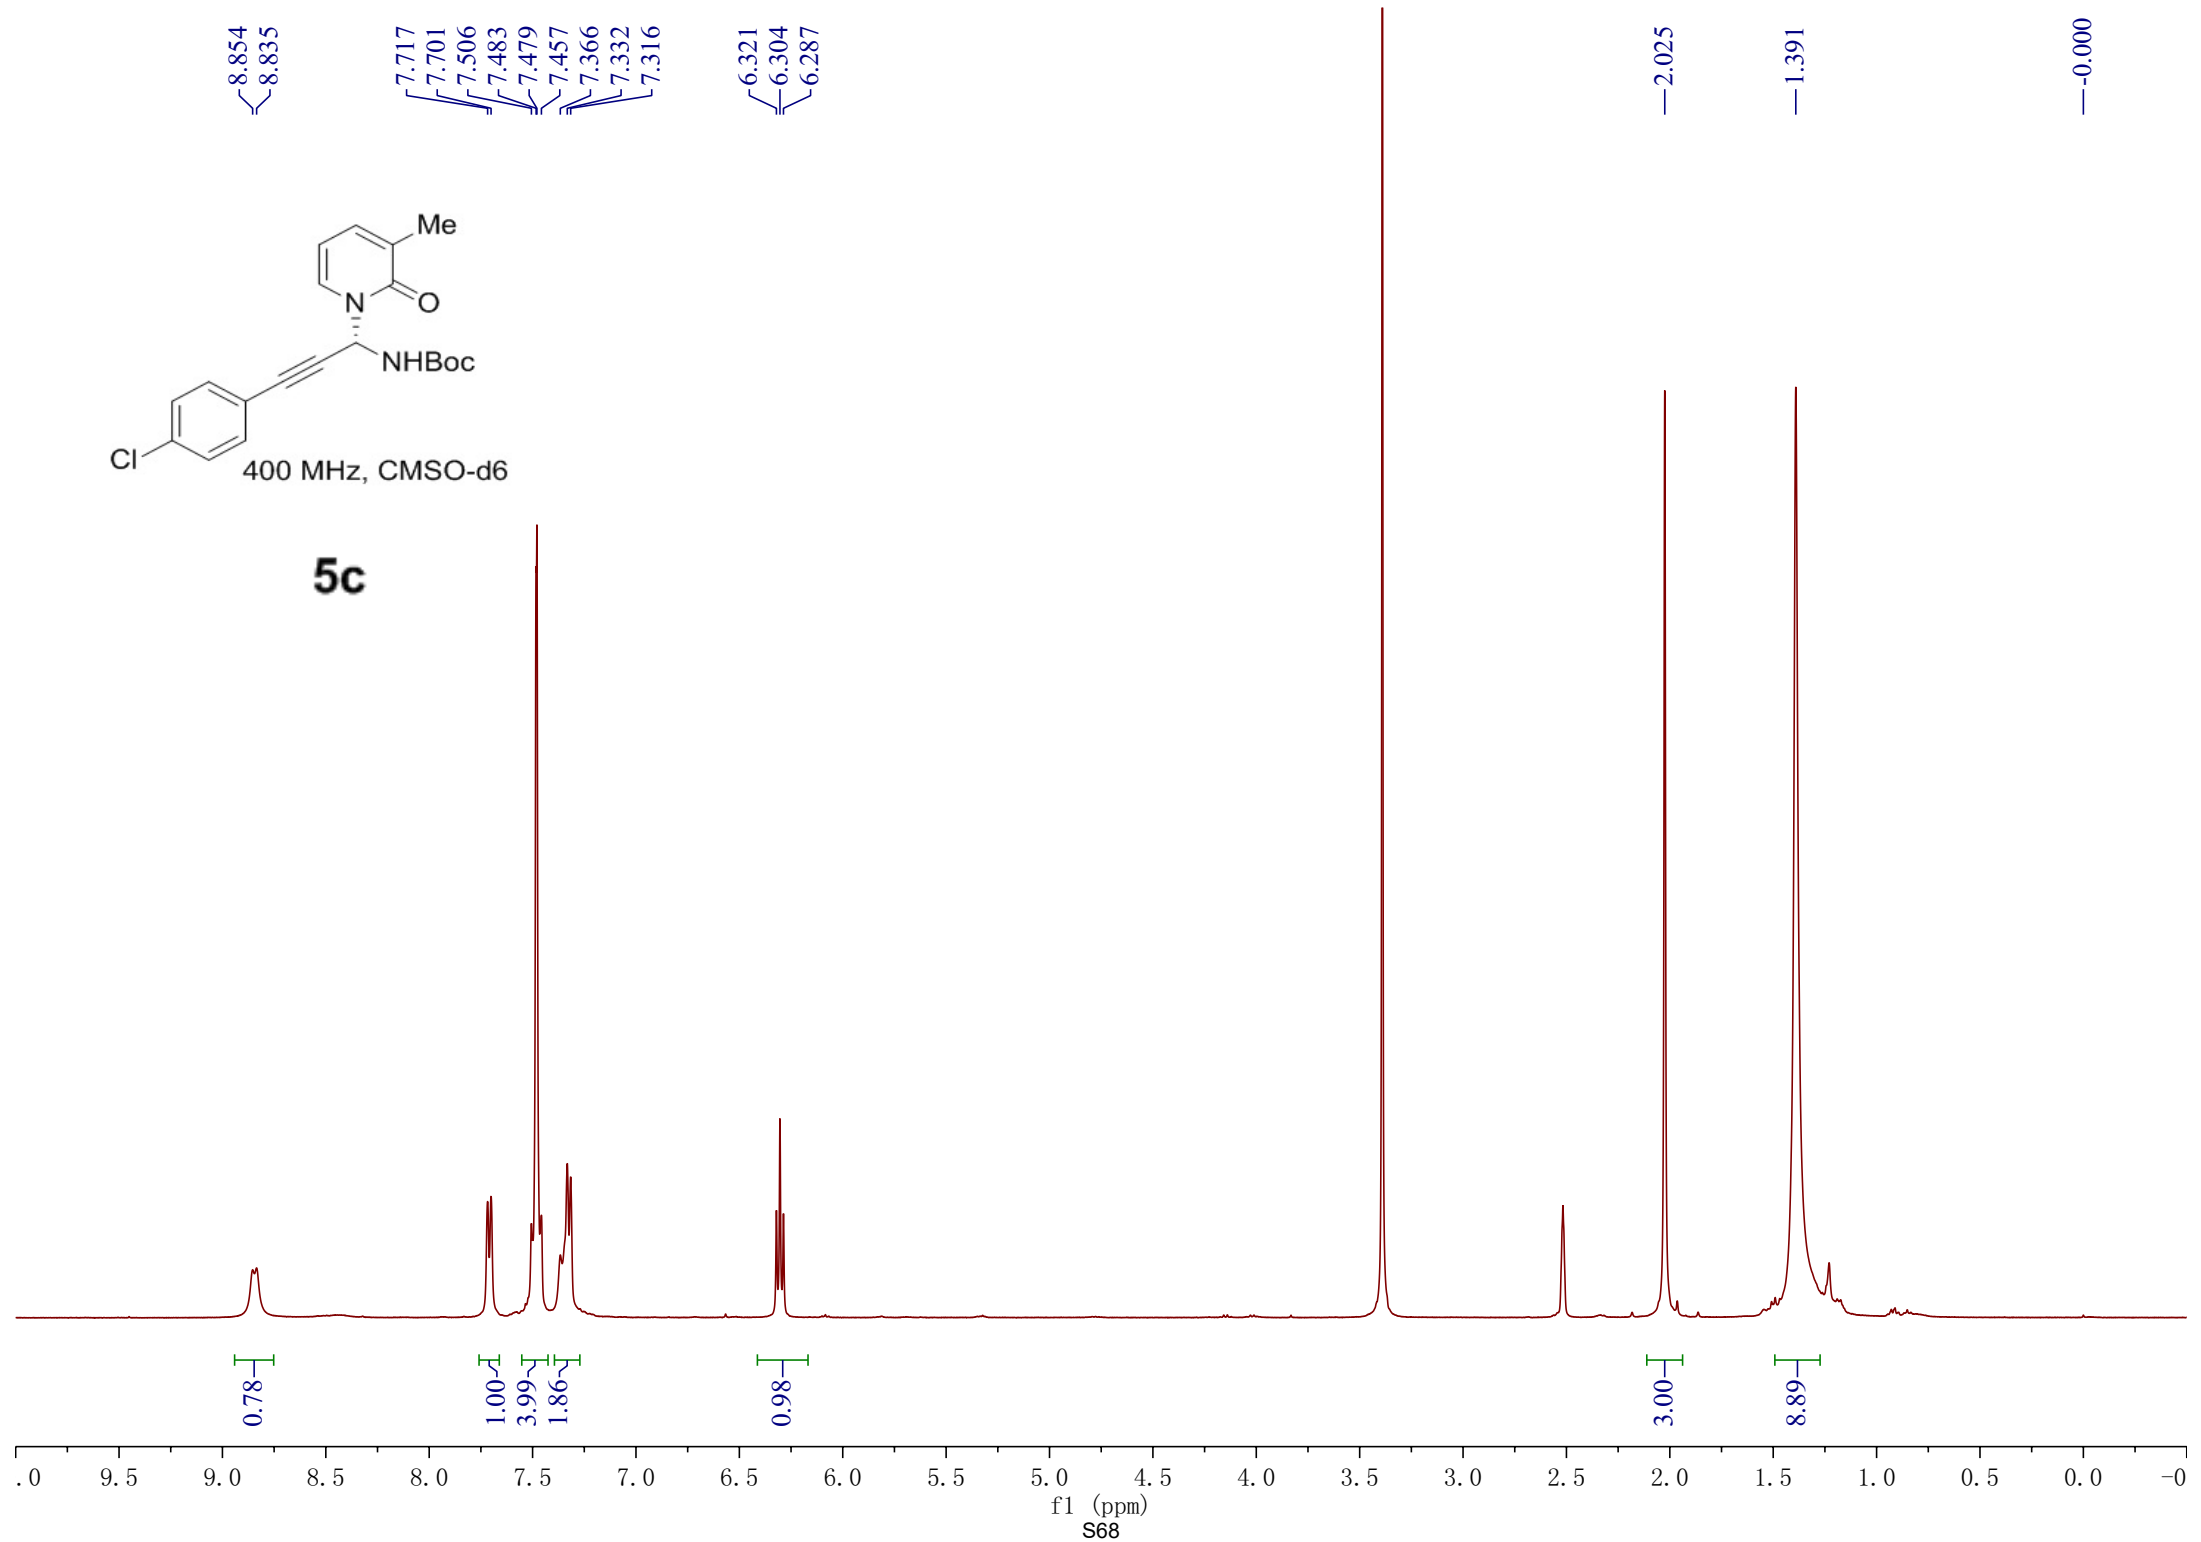

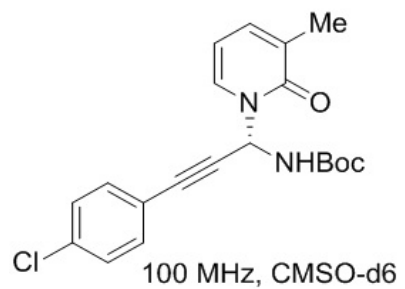

**5c**

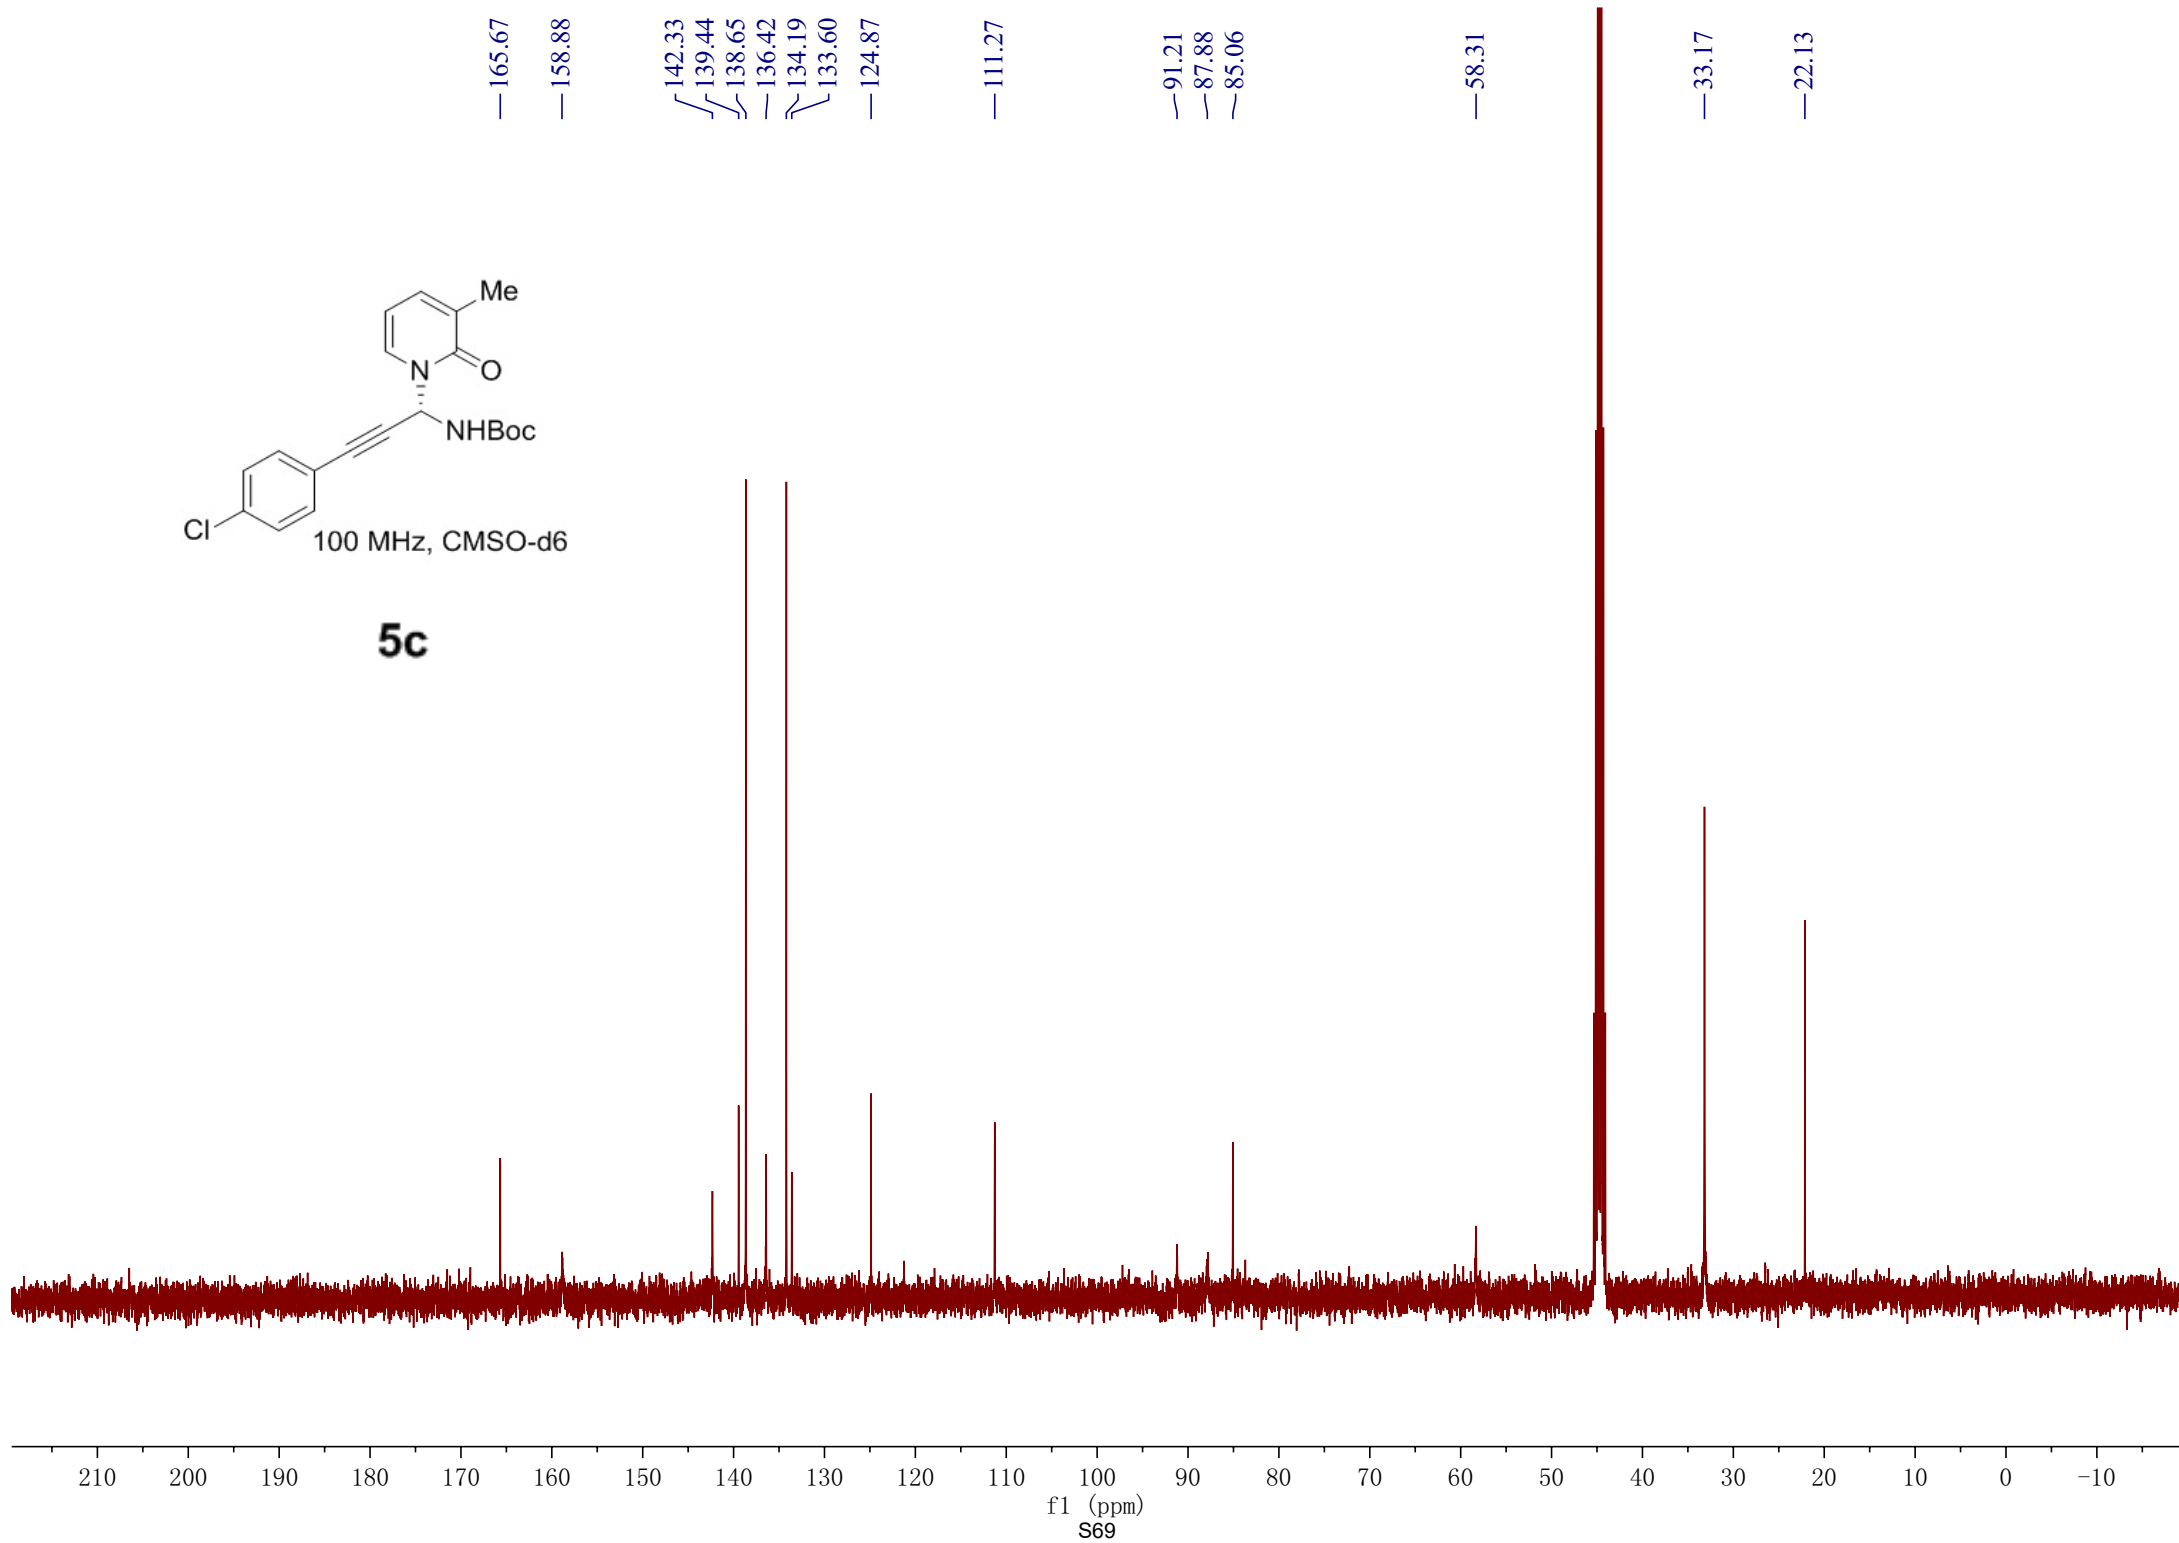

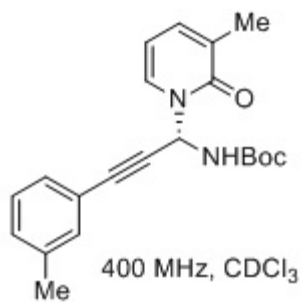

**5d**

7.529  
7.513  
7.259  
7.241  
7.223  
7.201  
7.188  
7.170  
7.151  
7.134  
7.115  
6.756  
6.655  
6.137  
6.120  
6.103

2.293  
2.165

1.426

0.000

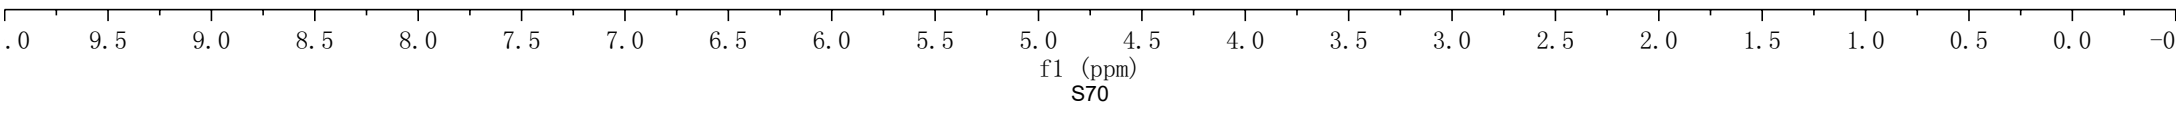



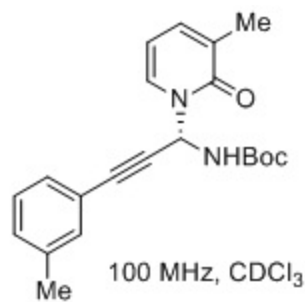

**5d**

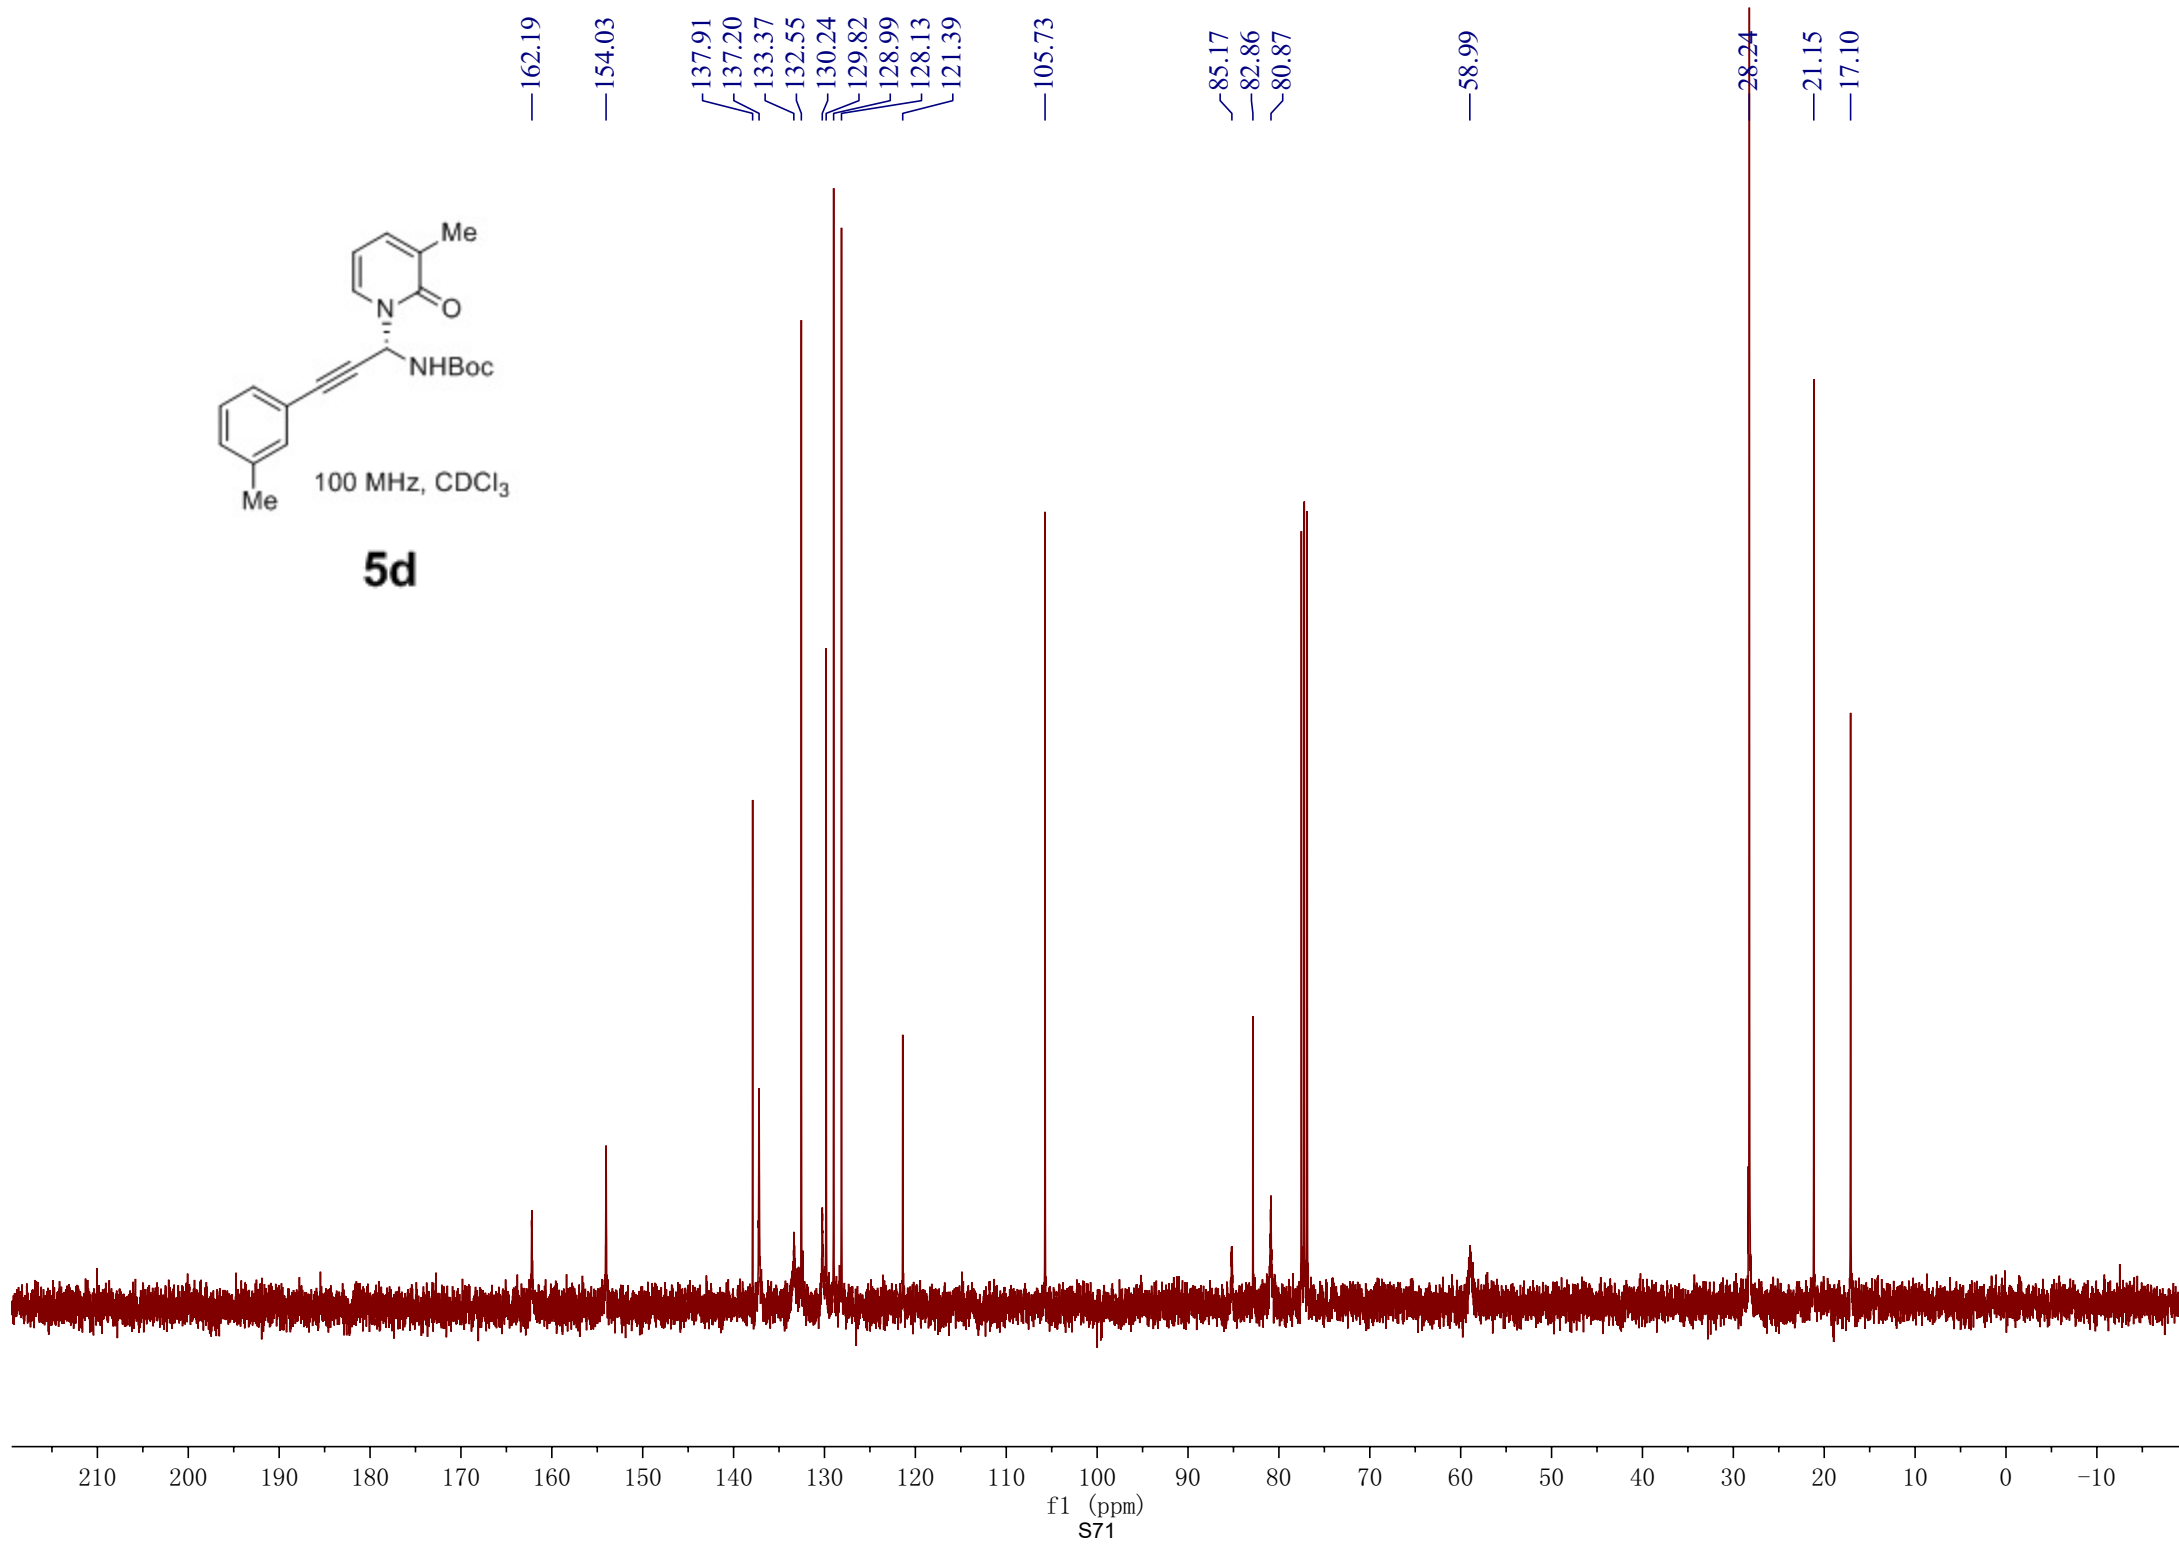

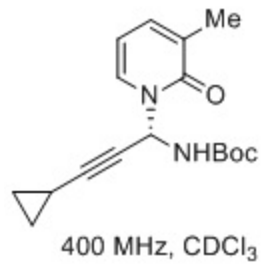

**5e**

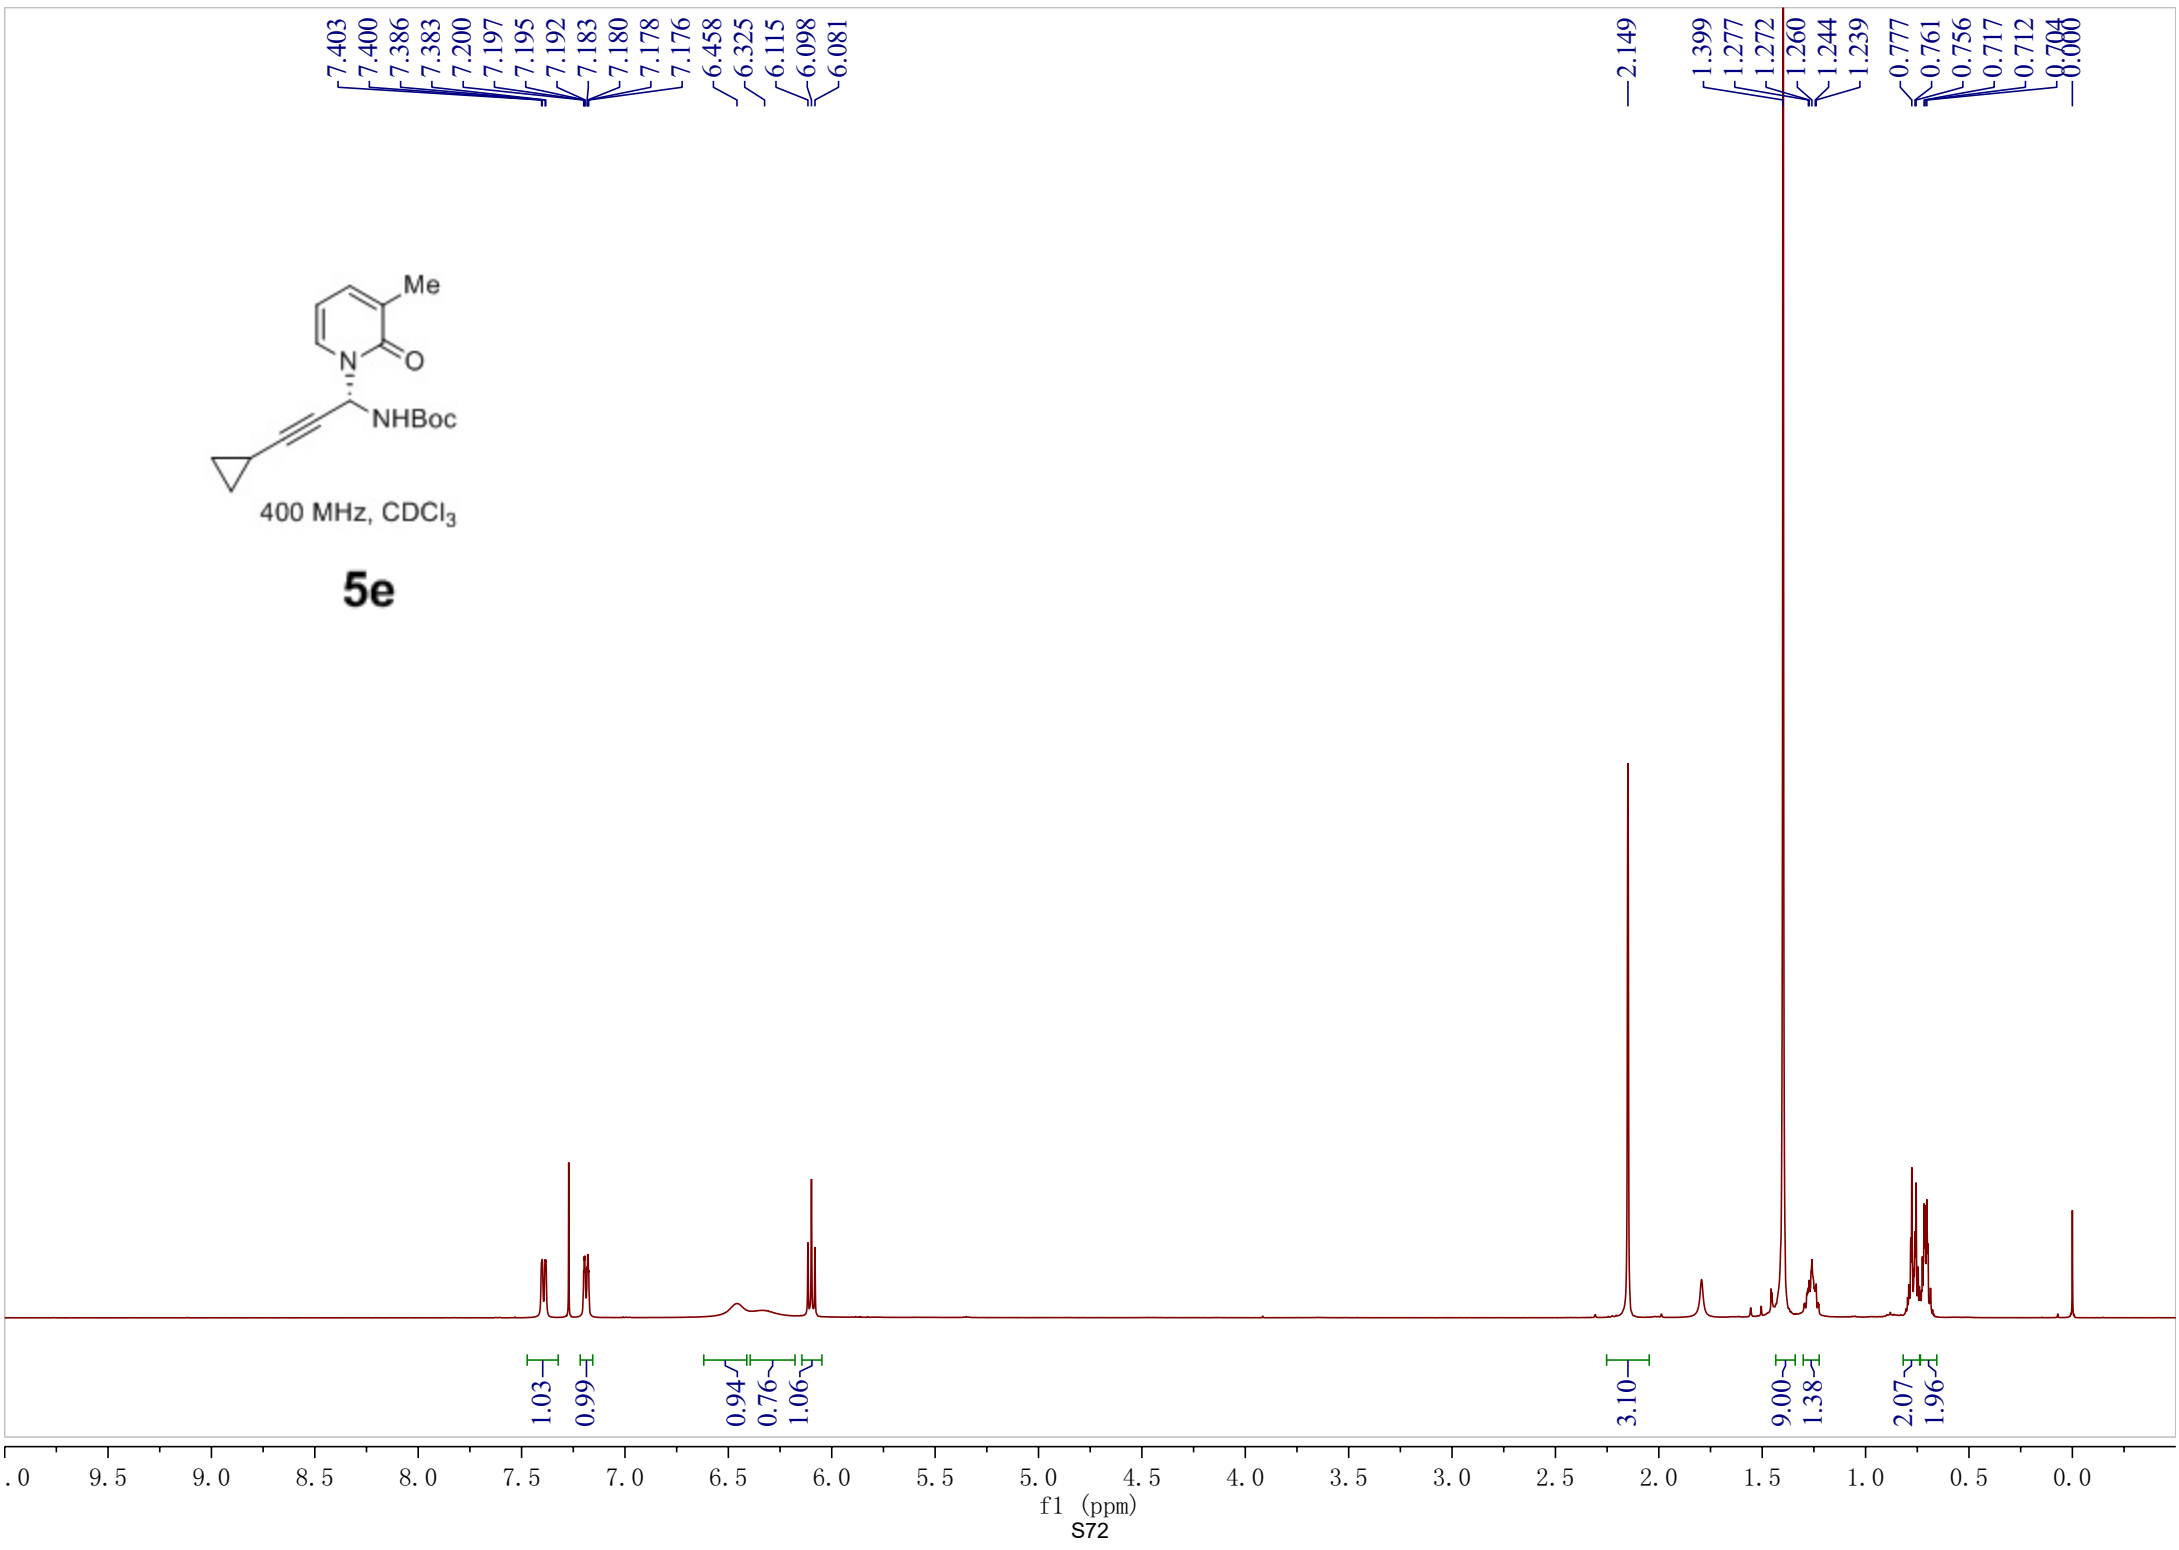

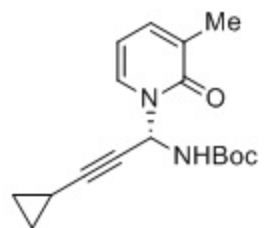

100 MHz, CDCl<sub>3</sub>

**5e**

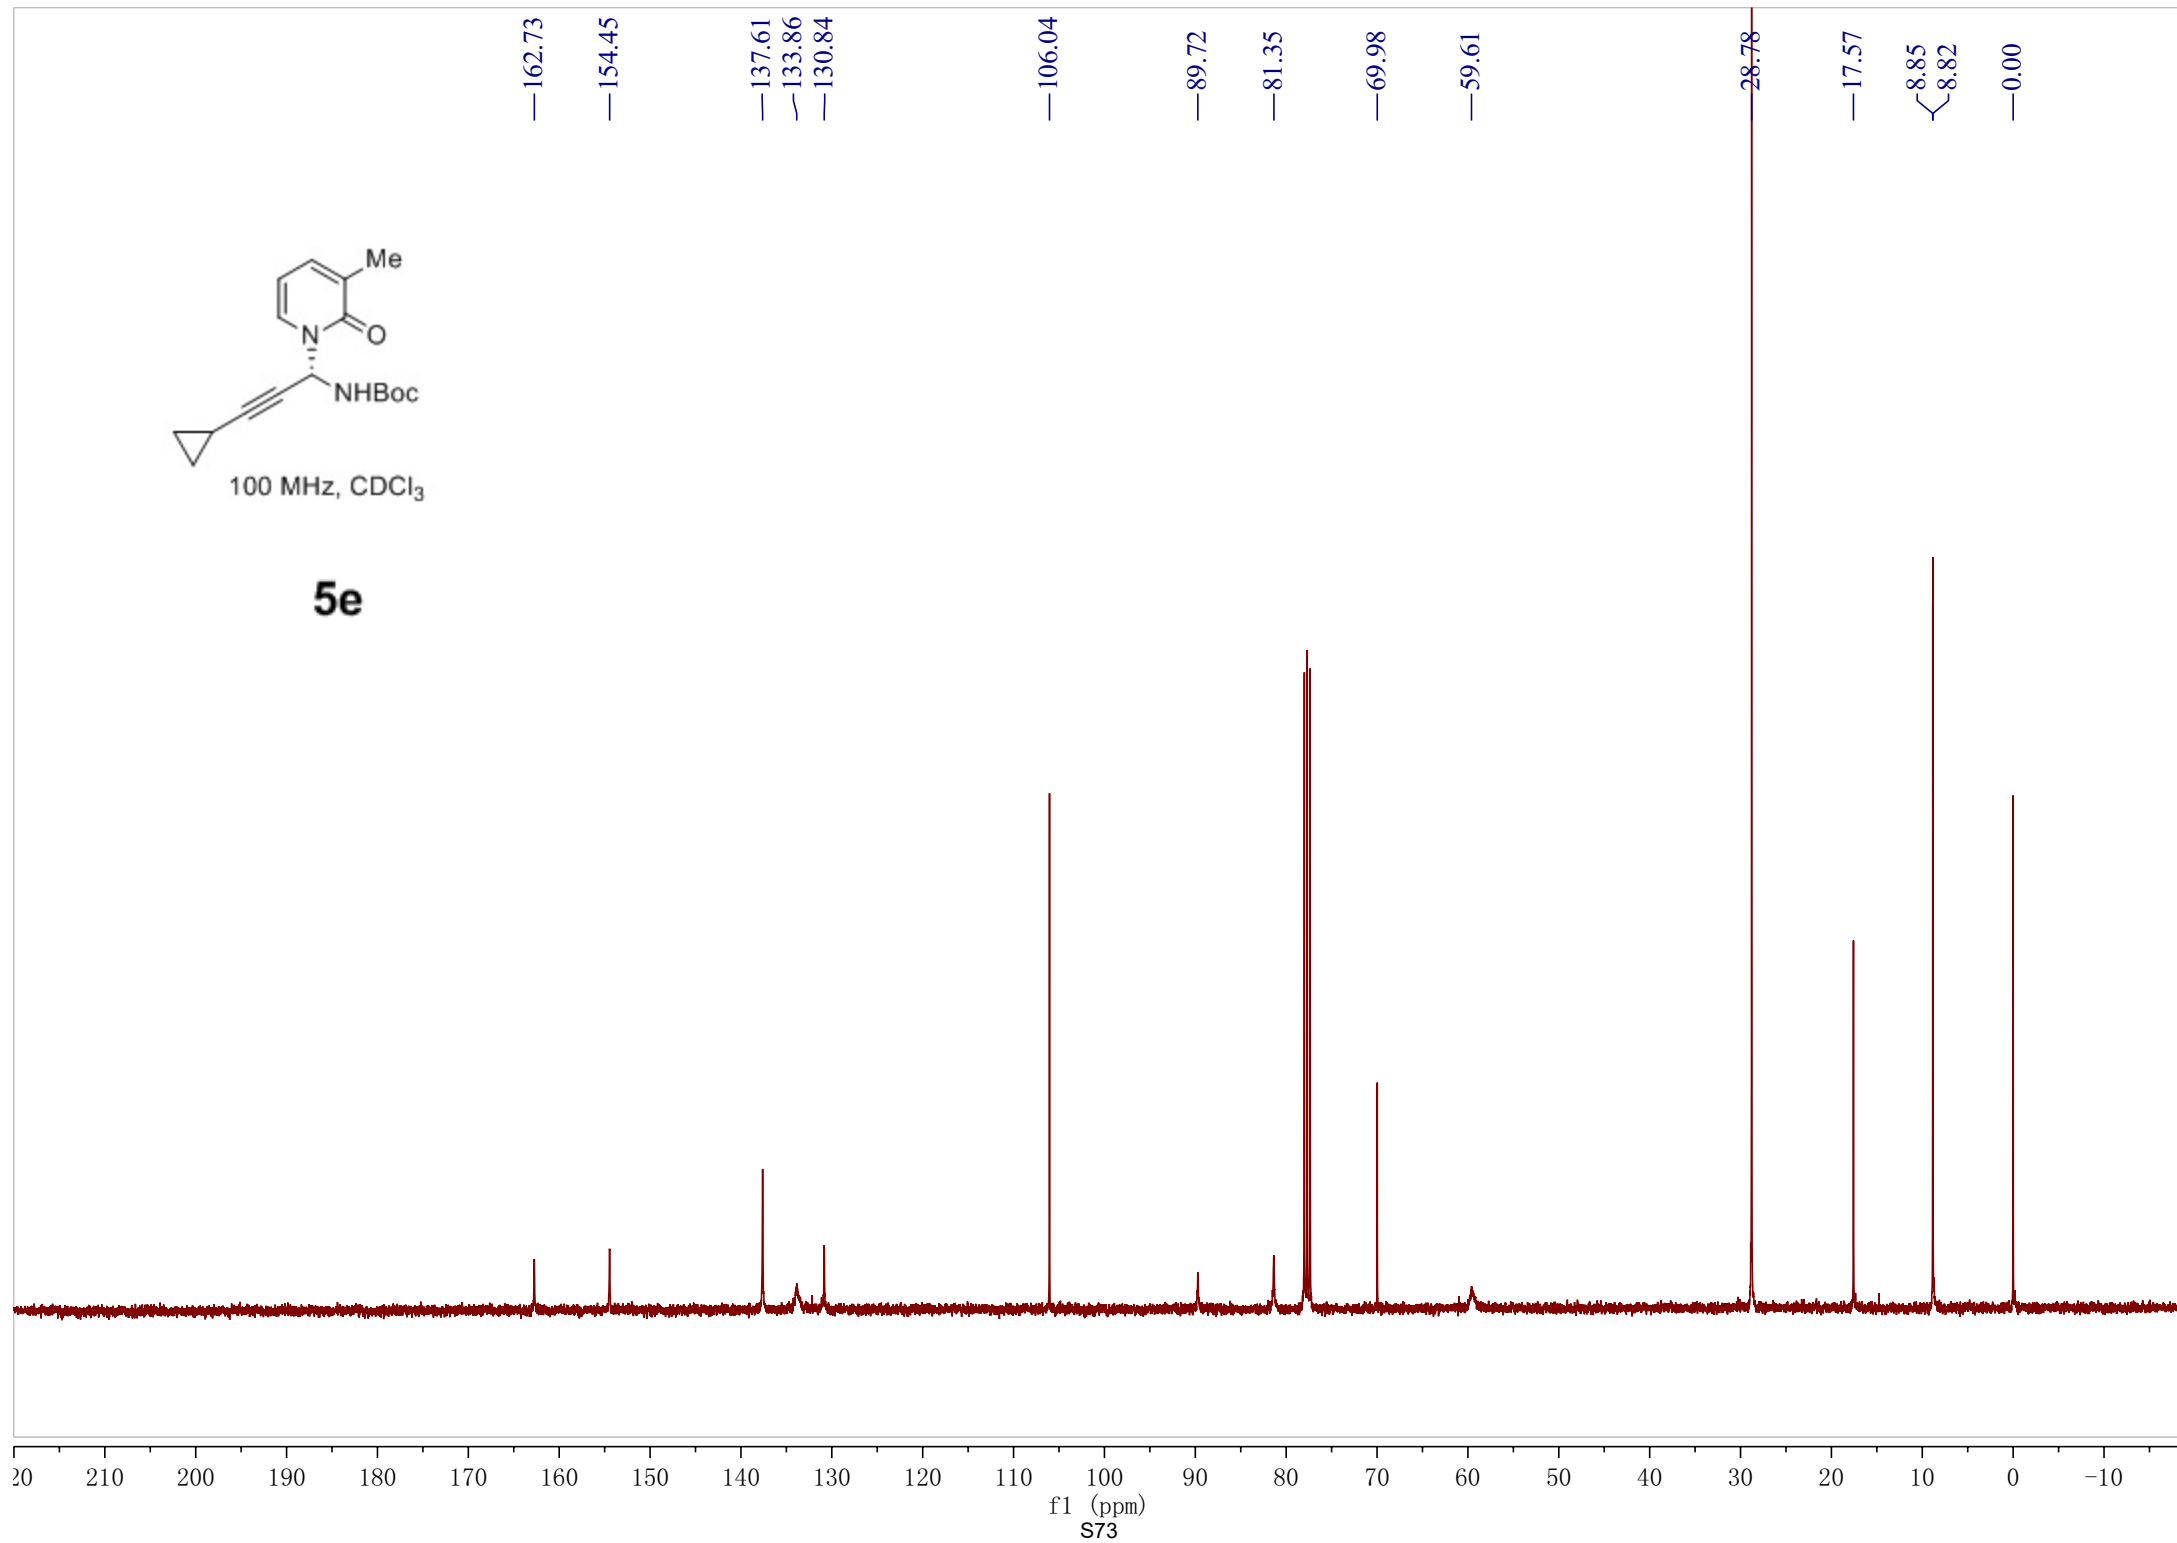

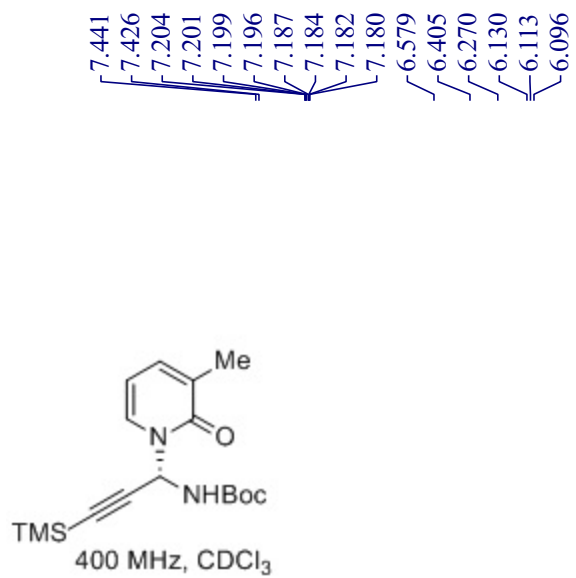

**5f**

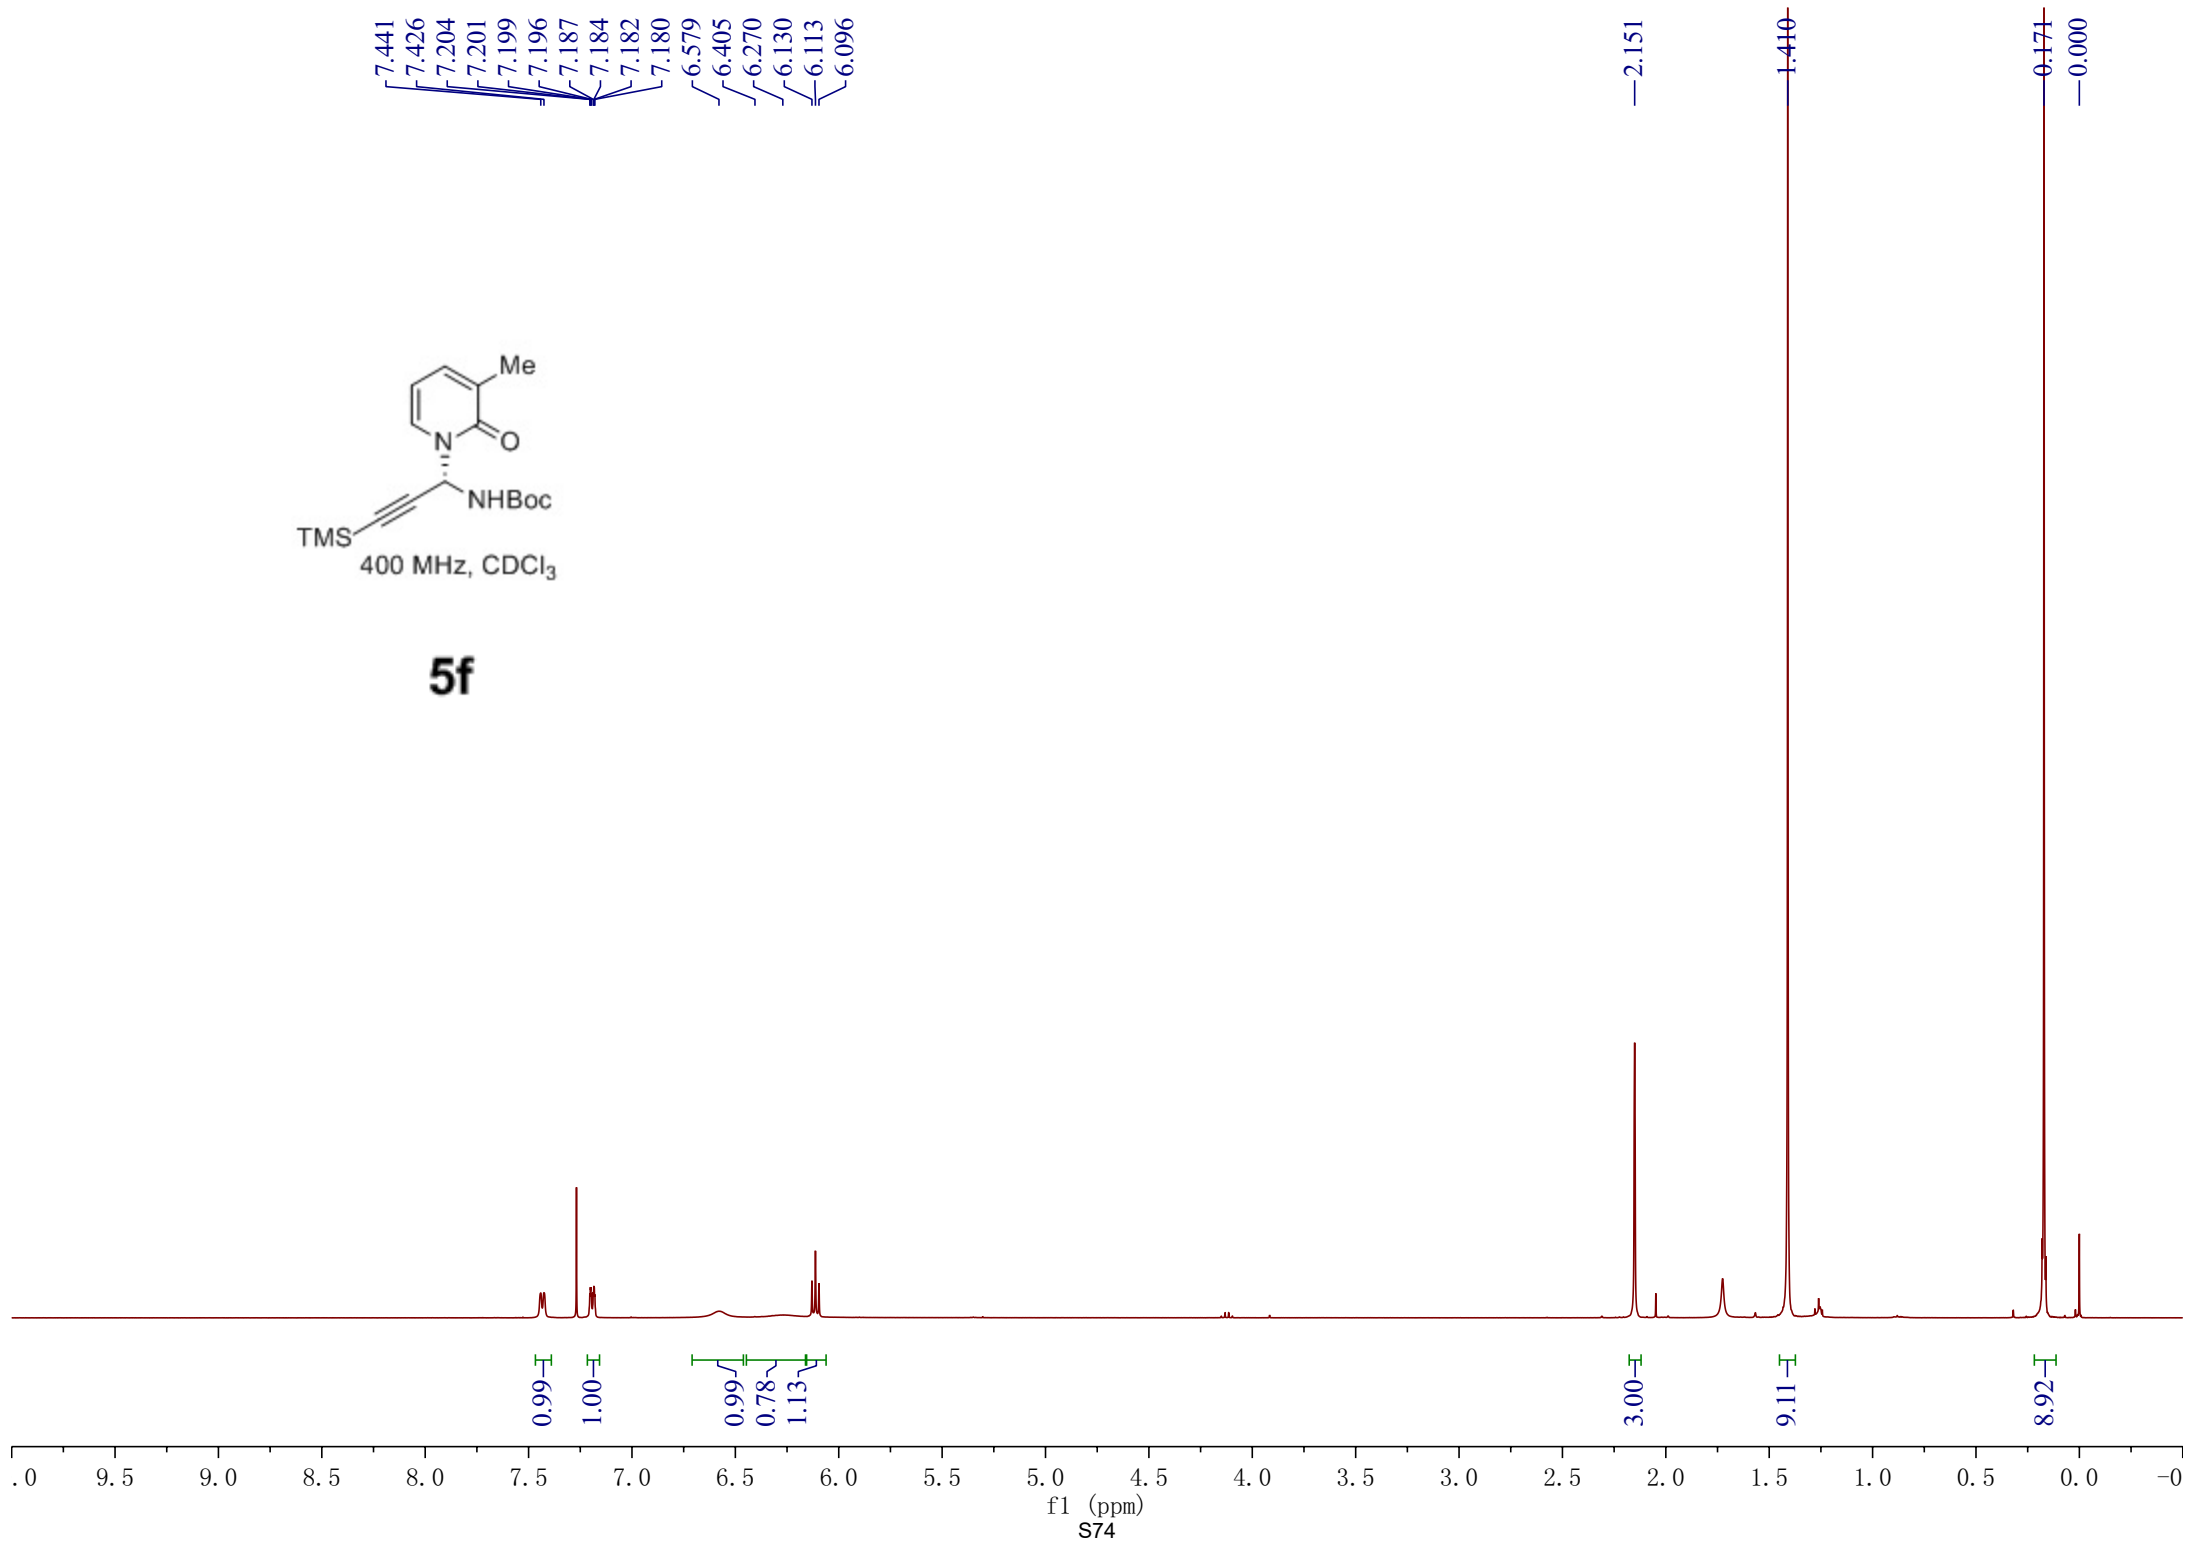

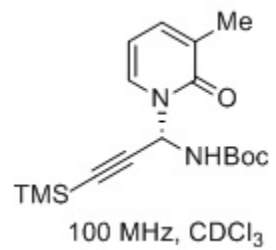

**5f**

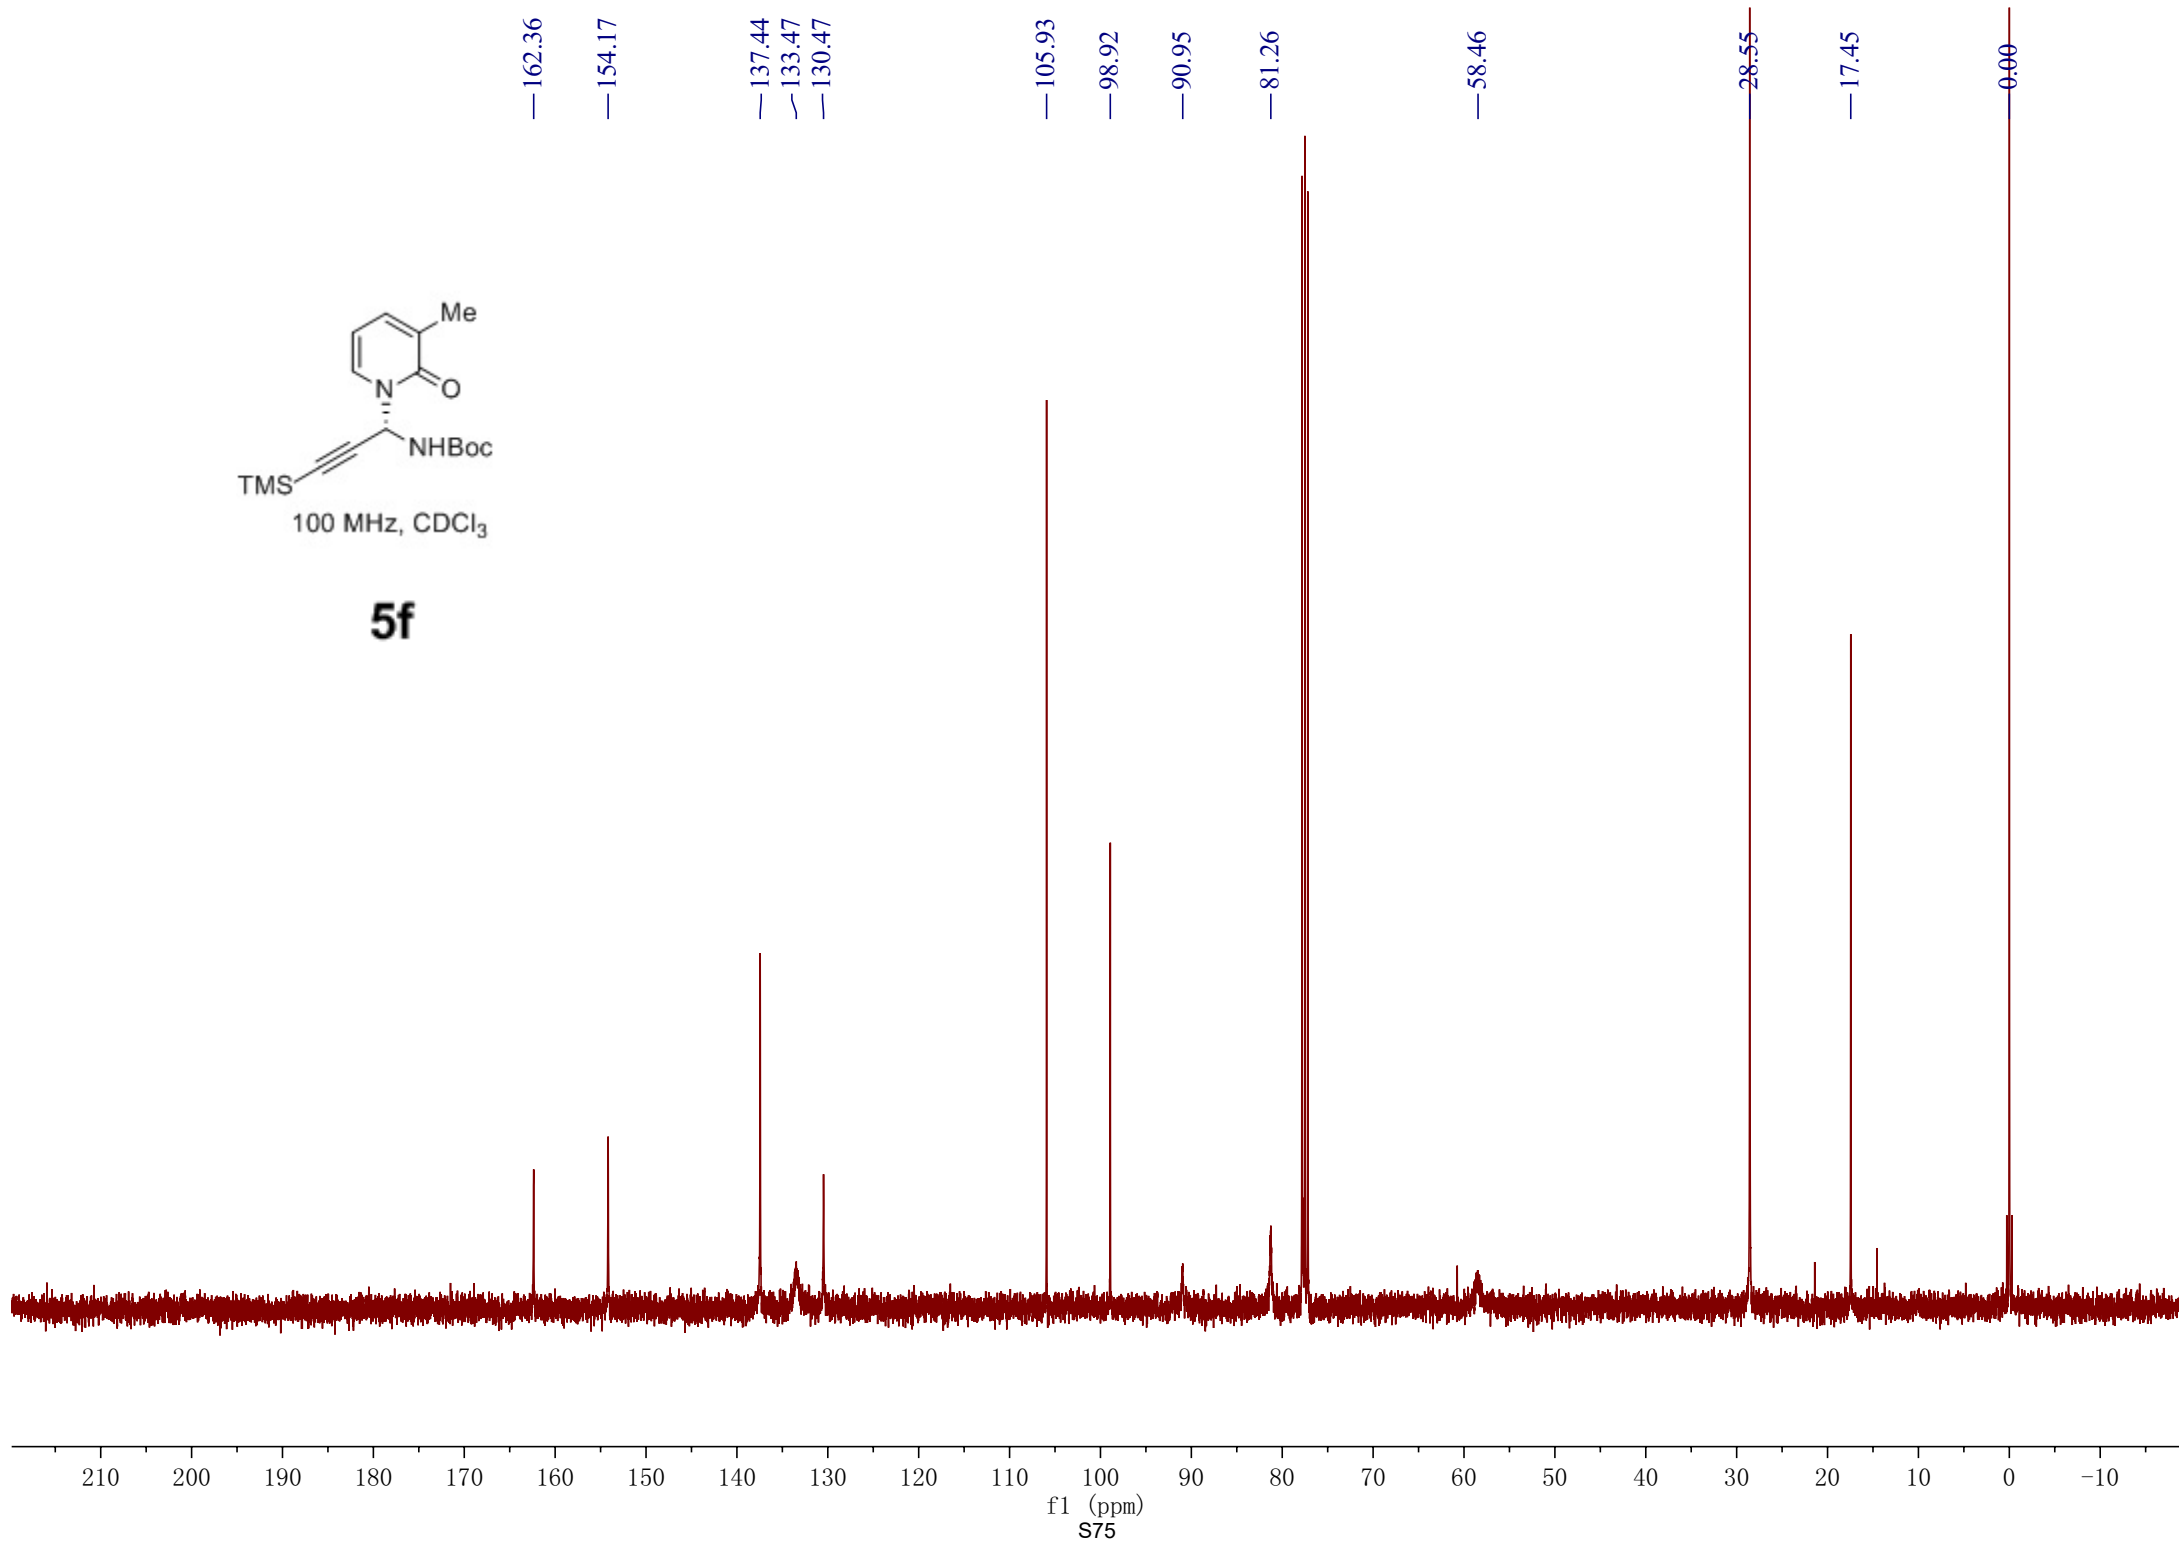

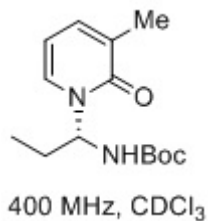

**5g**

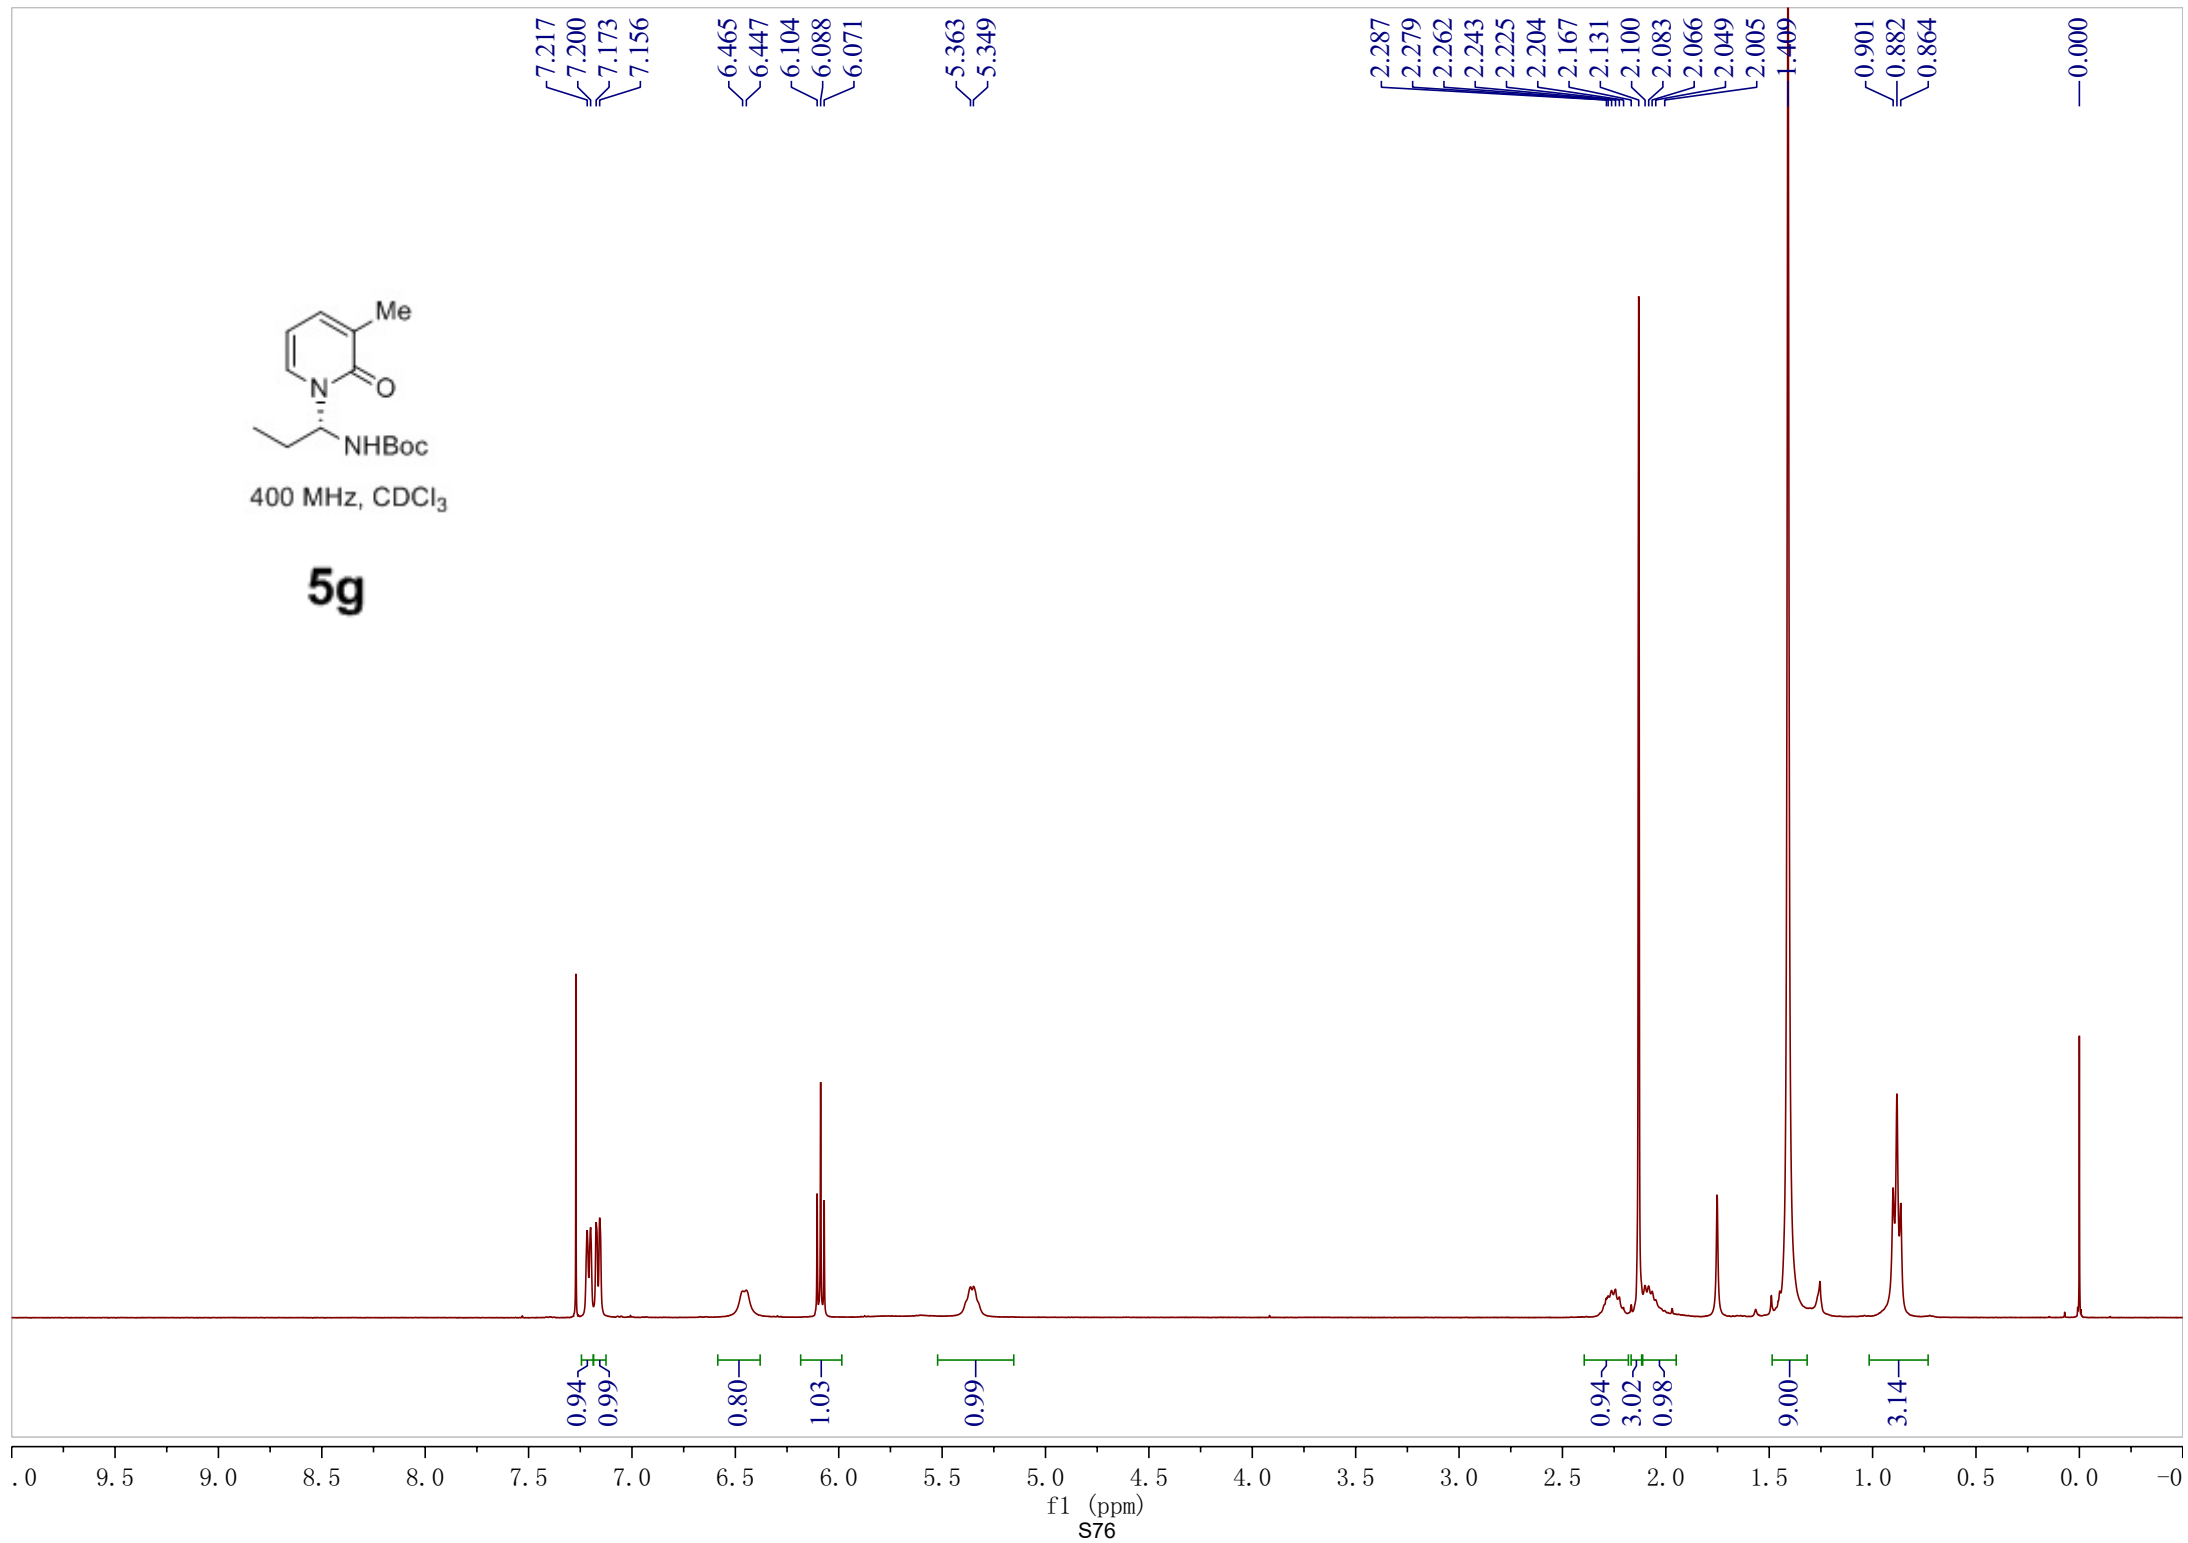

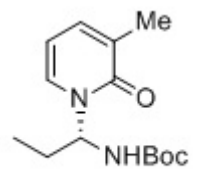

100 MHz, CDCl<sub>3</sub>

**5g**

—163.22

—155.00

—137.02

—134.89

—130.50

—105.37

—80.12

—73.38

—28.24

—26.08

—16.87

—10.35

210 200 190 180 170 160 150 140 130 120 110 100 90 80 70 60 50 40 30 20 10 0 -10

f1 (ppm)  
S77

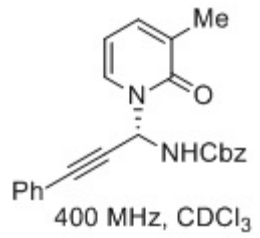

**5h**

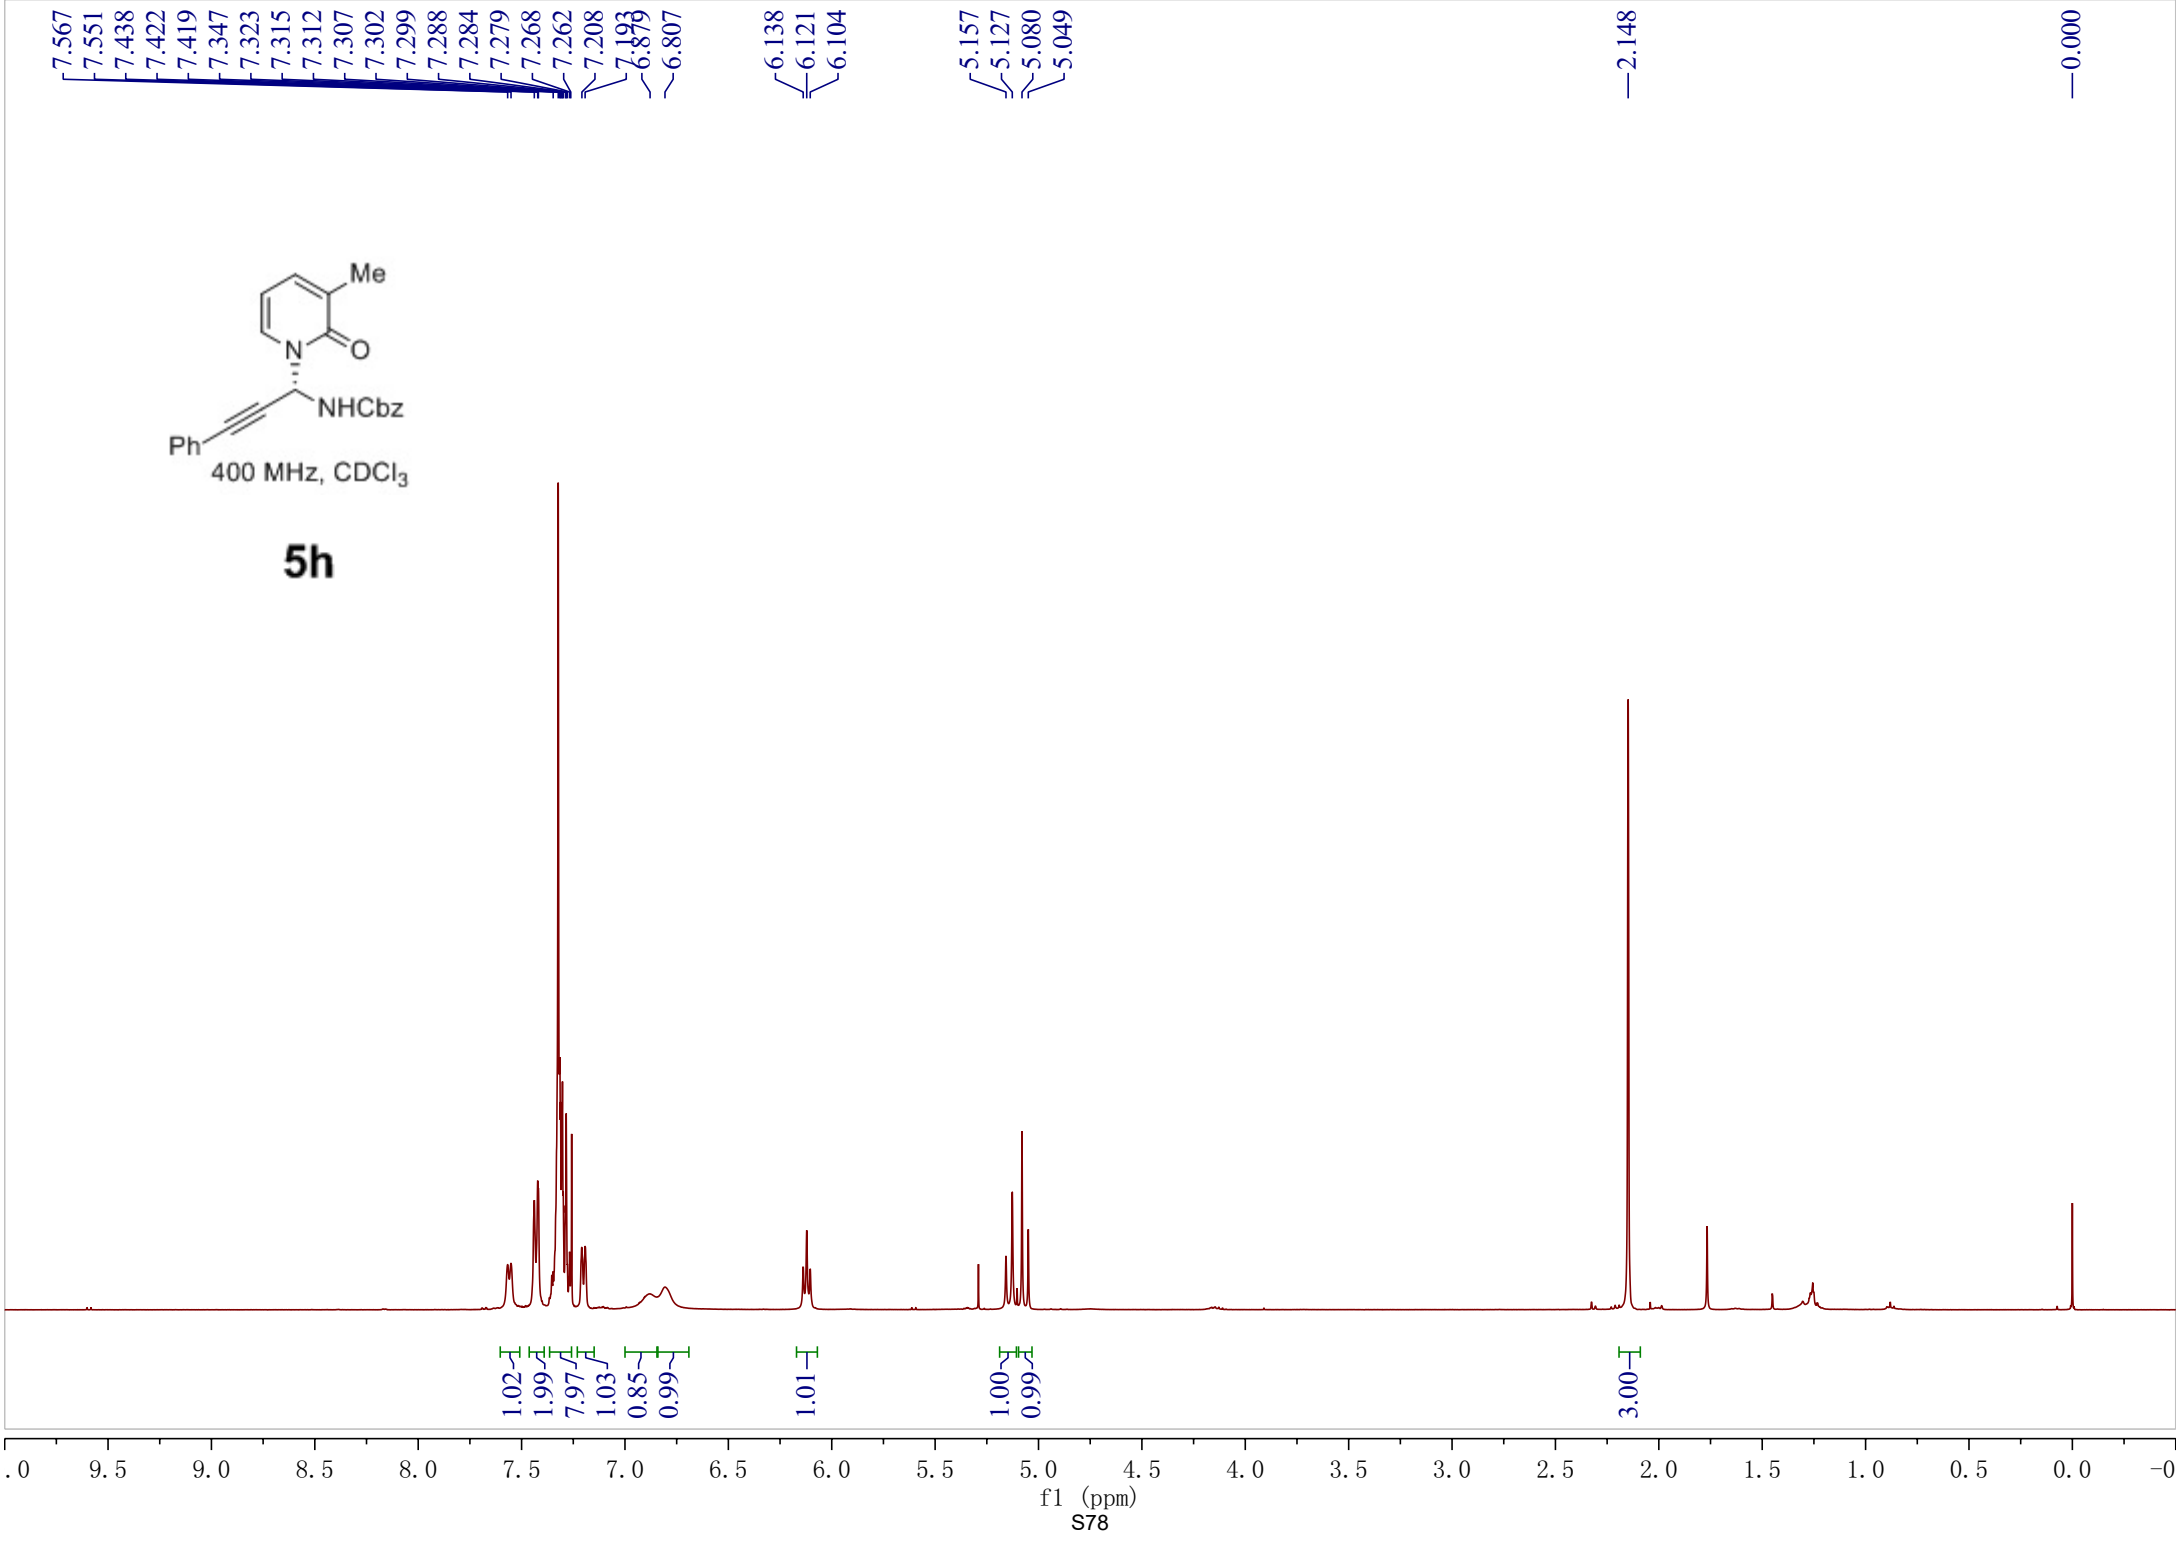



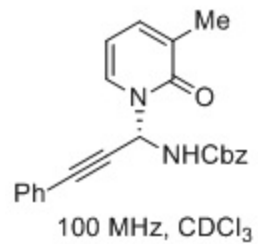

**5h**

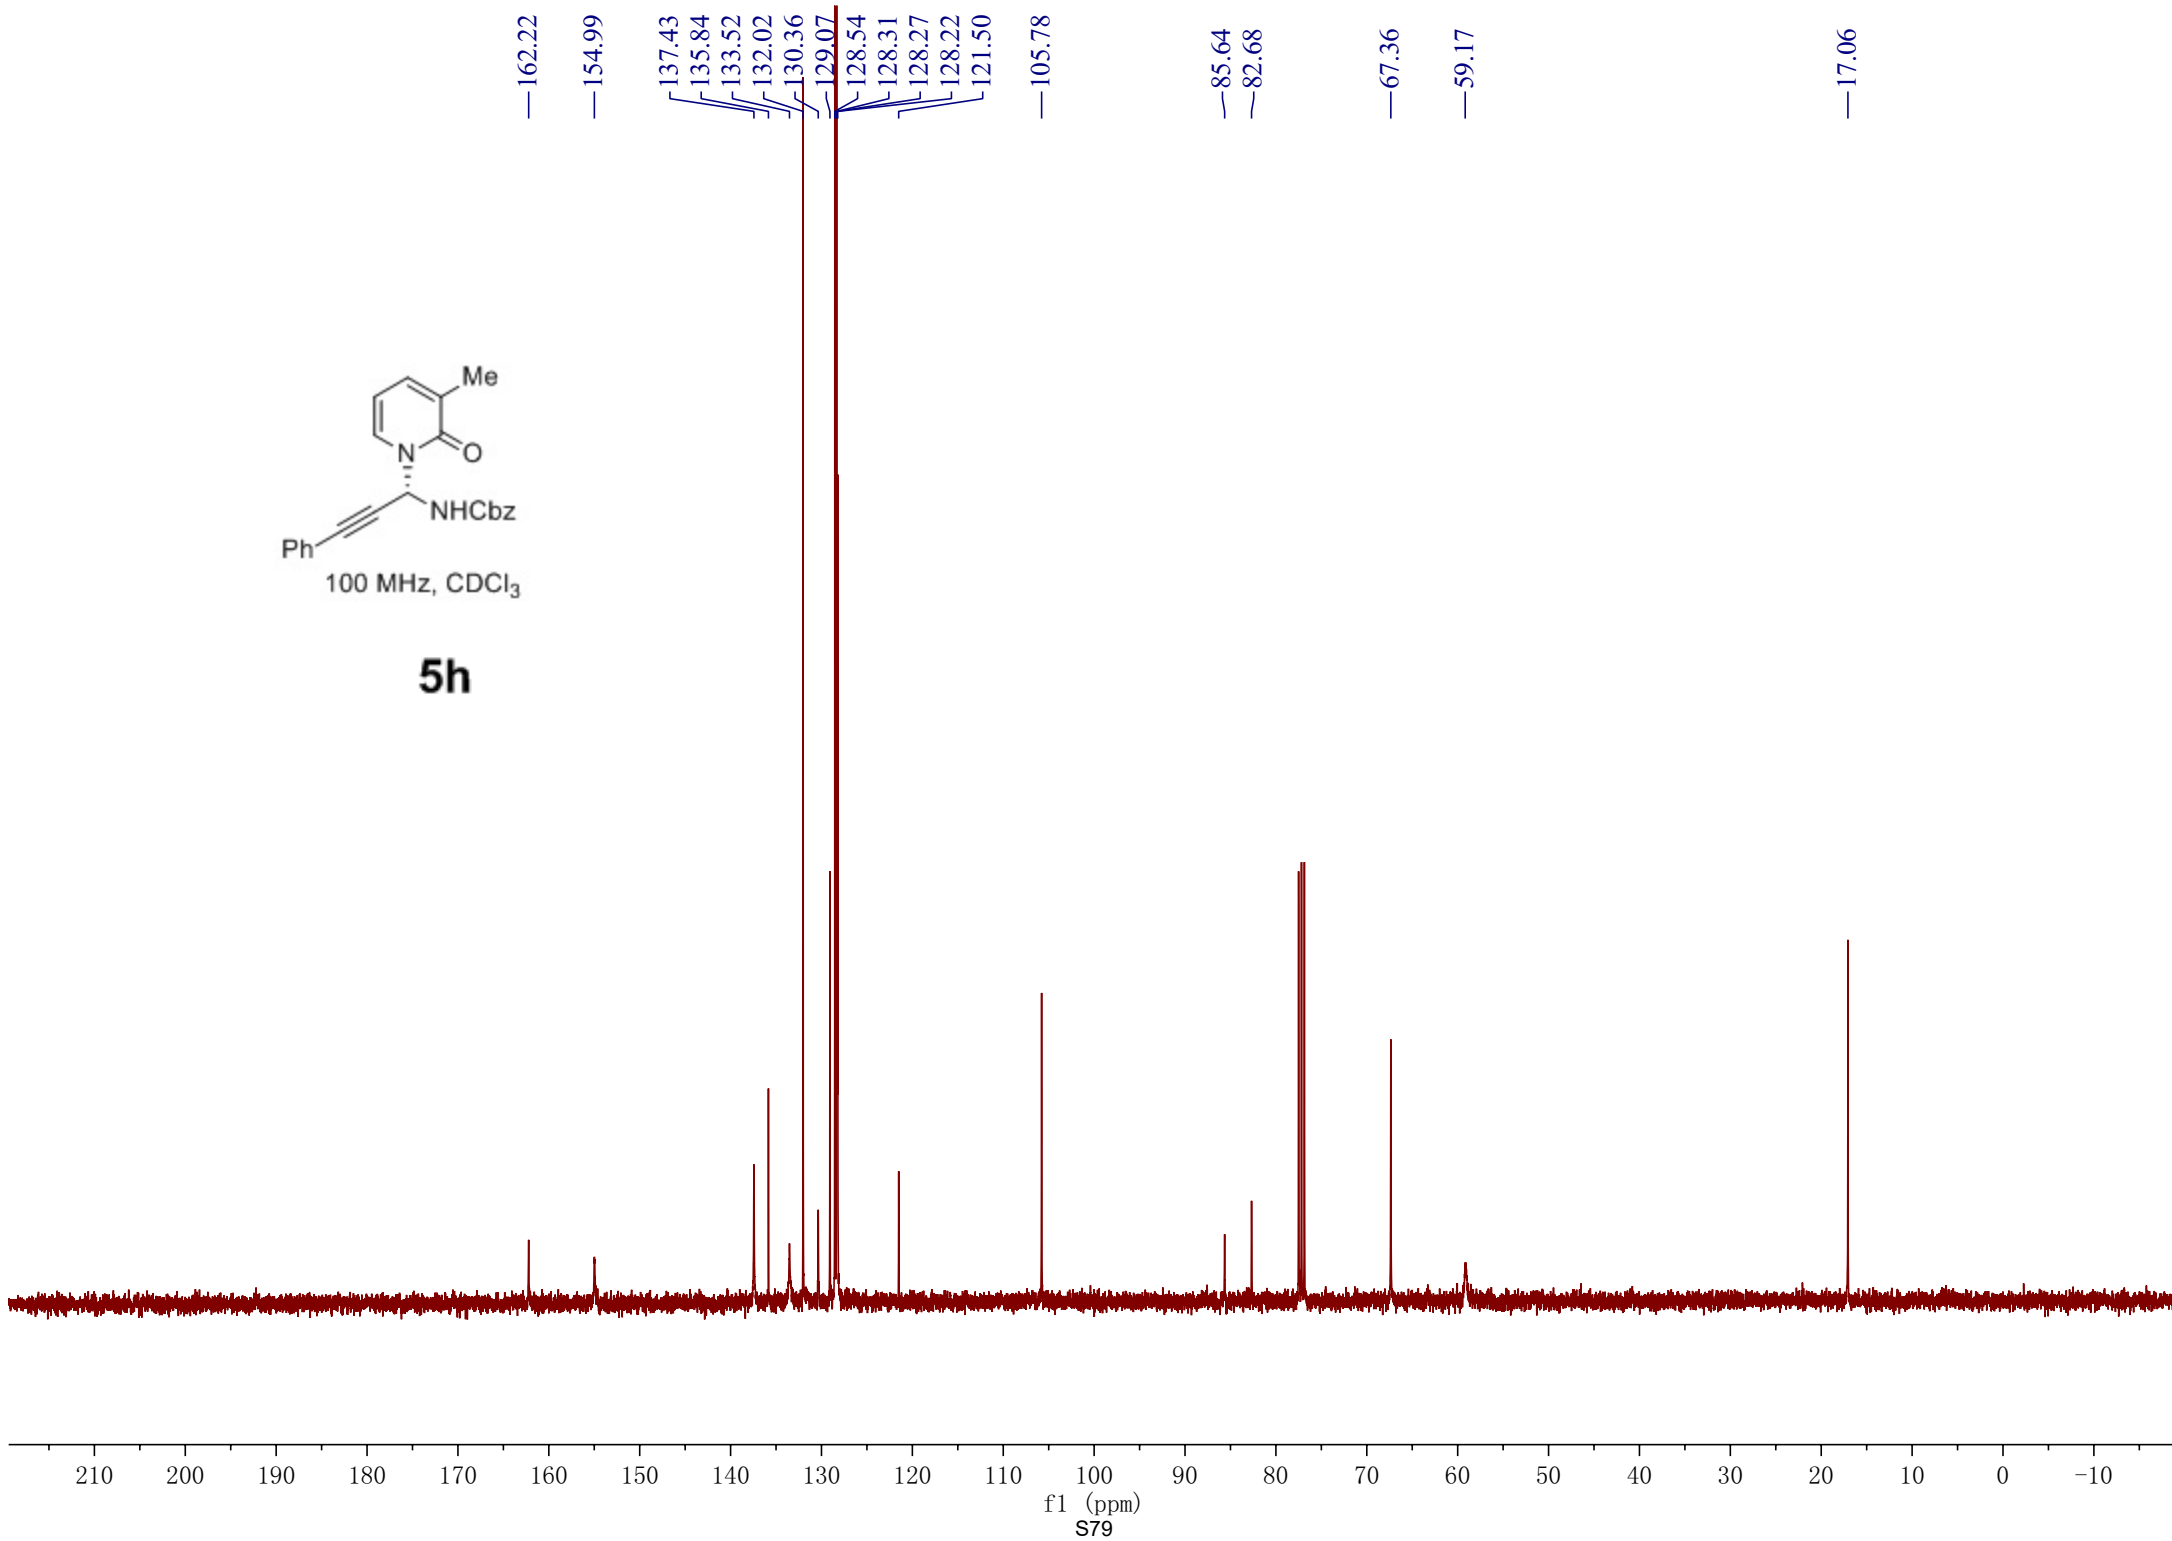

8.696  
8.675  
7.864  
7.846  
7.843  
7.449  
7.445  
7.429  
7.425  
7.407  
7.387  
7.292  
7.283  
7.265  
7.118  
7.097  
6.161  
6.144  
6.127

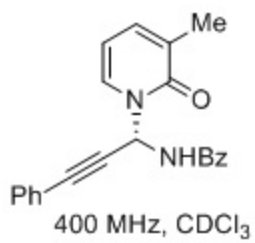

**5i**

2.133

0.000

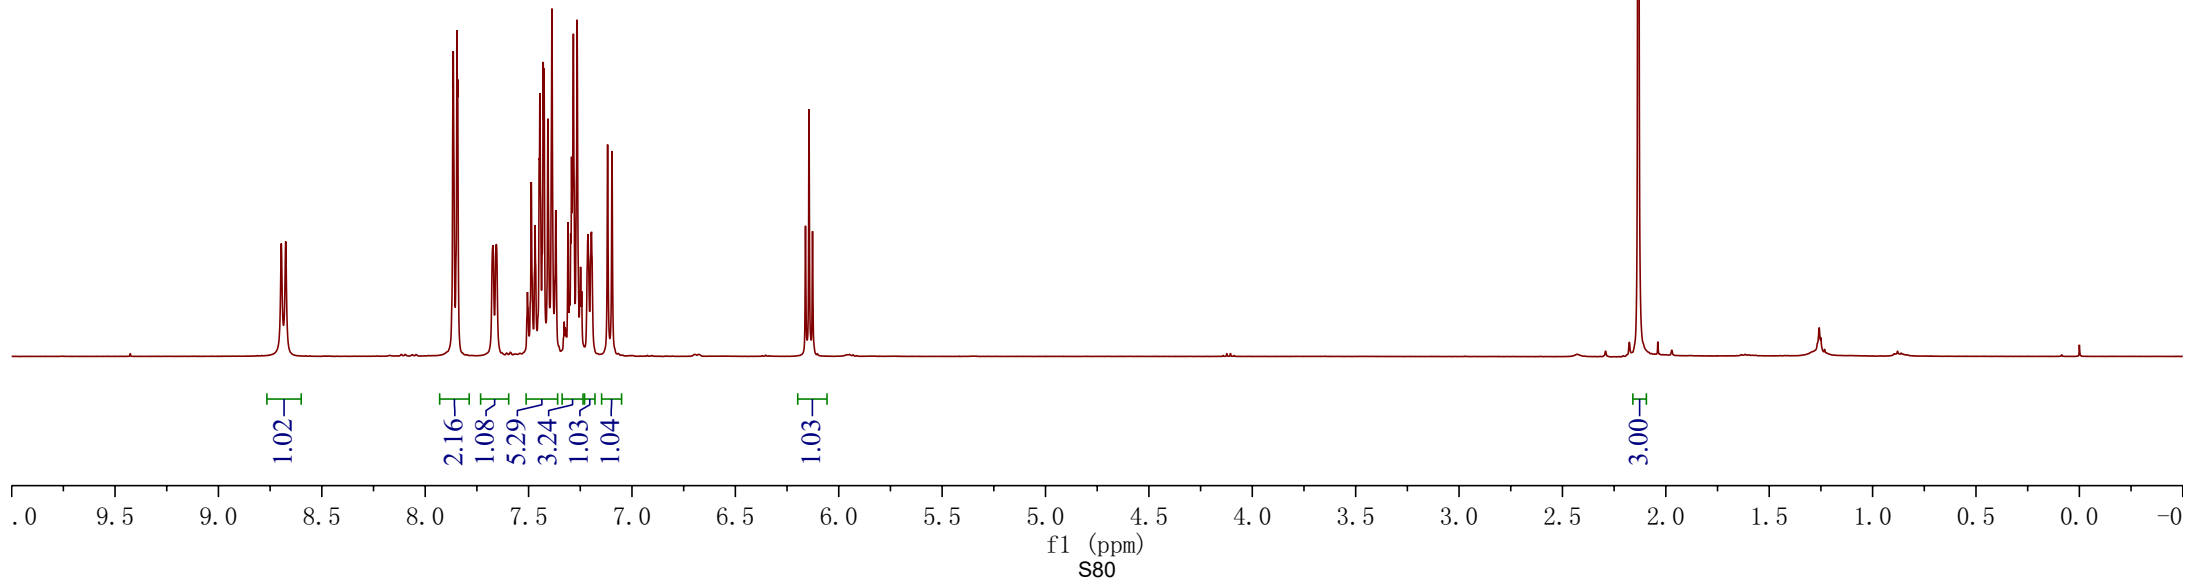

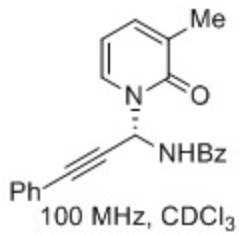

**5i**

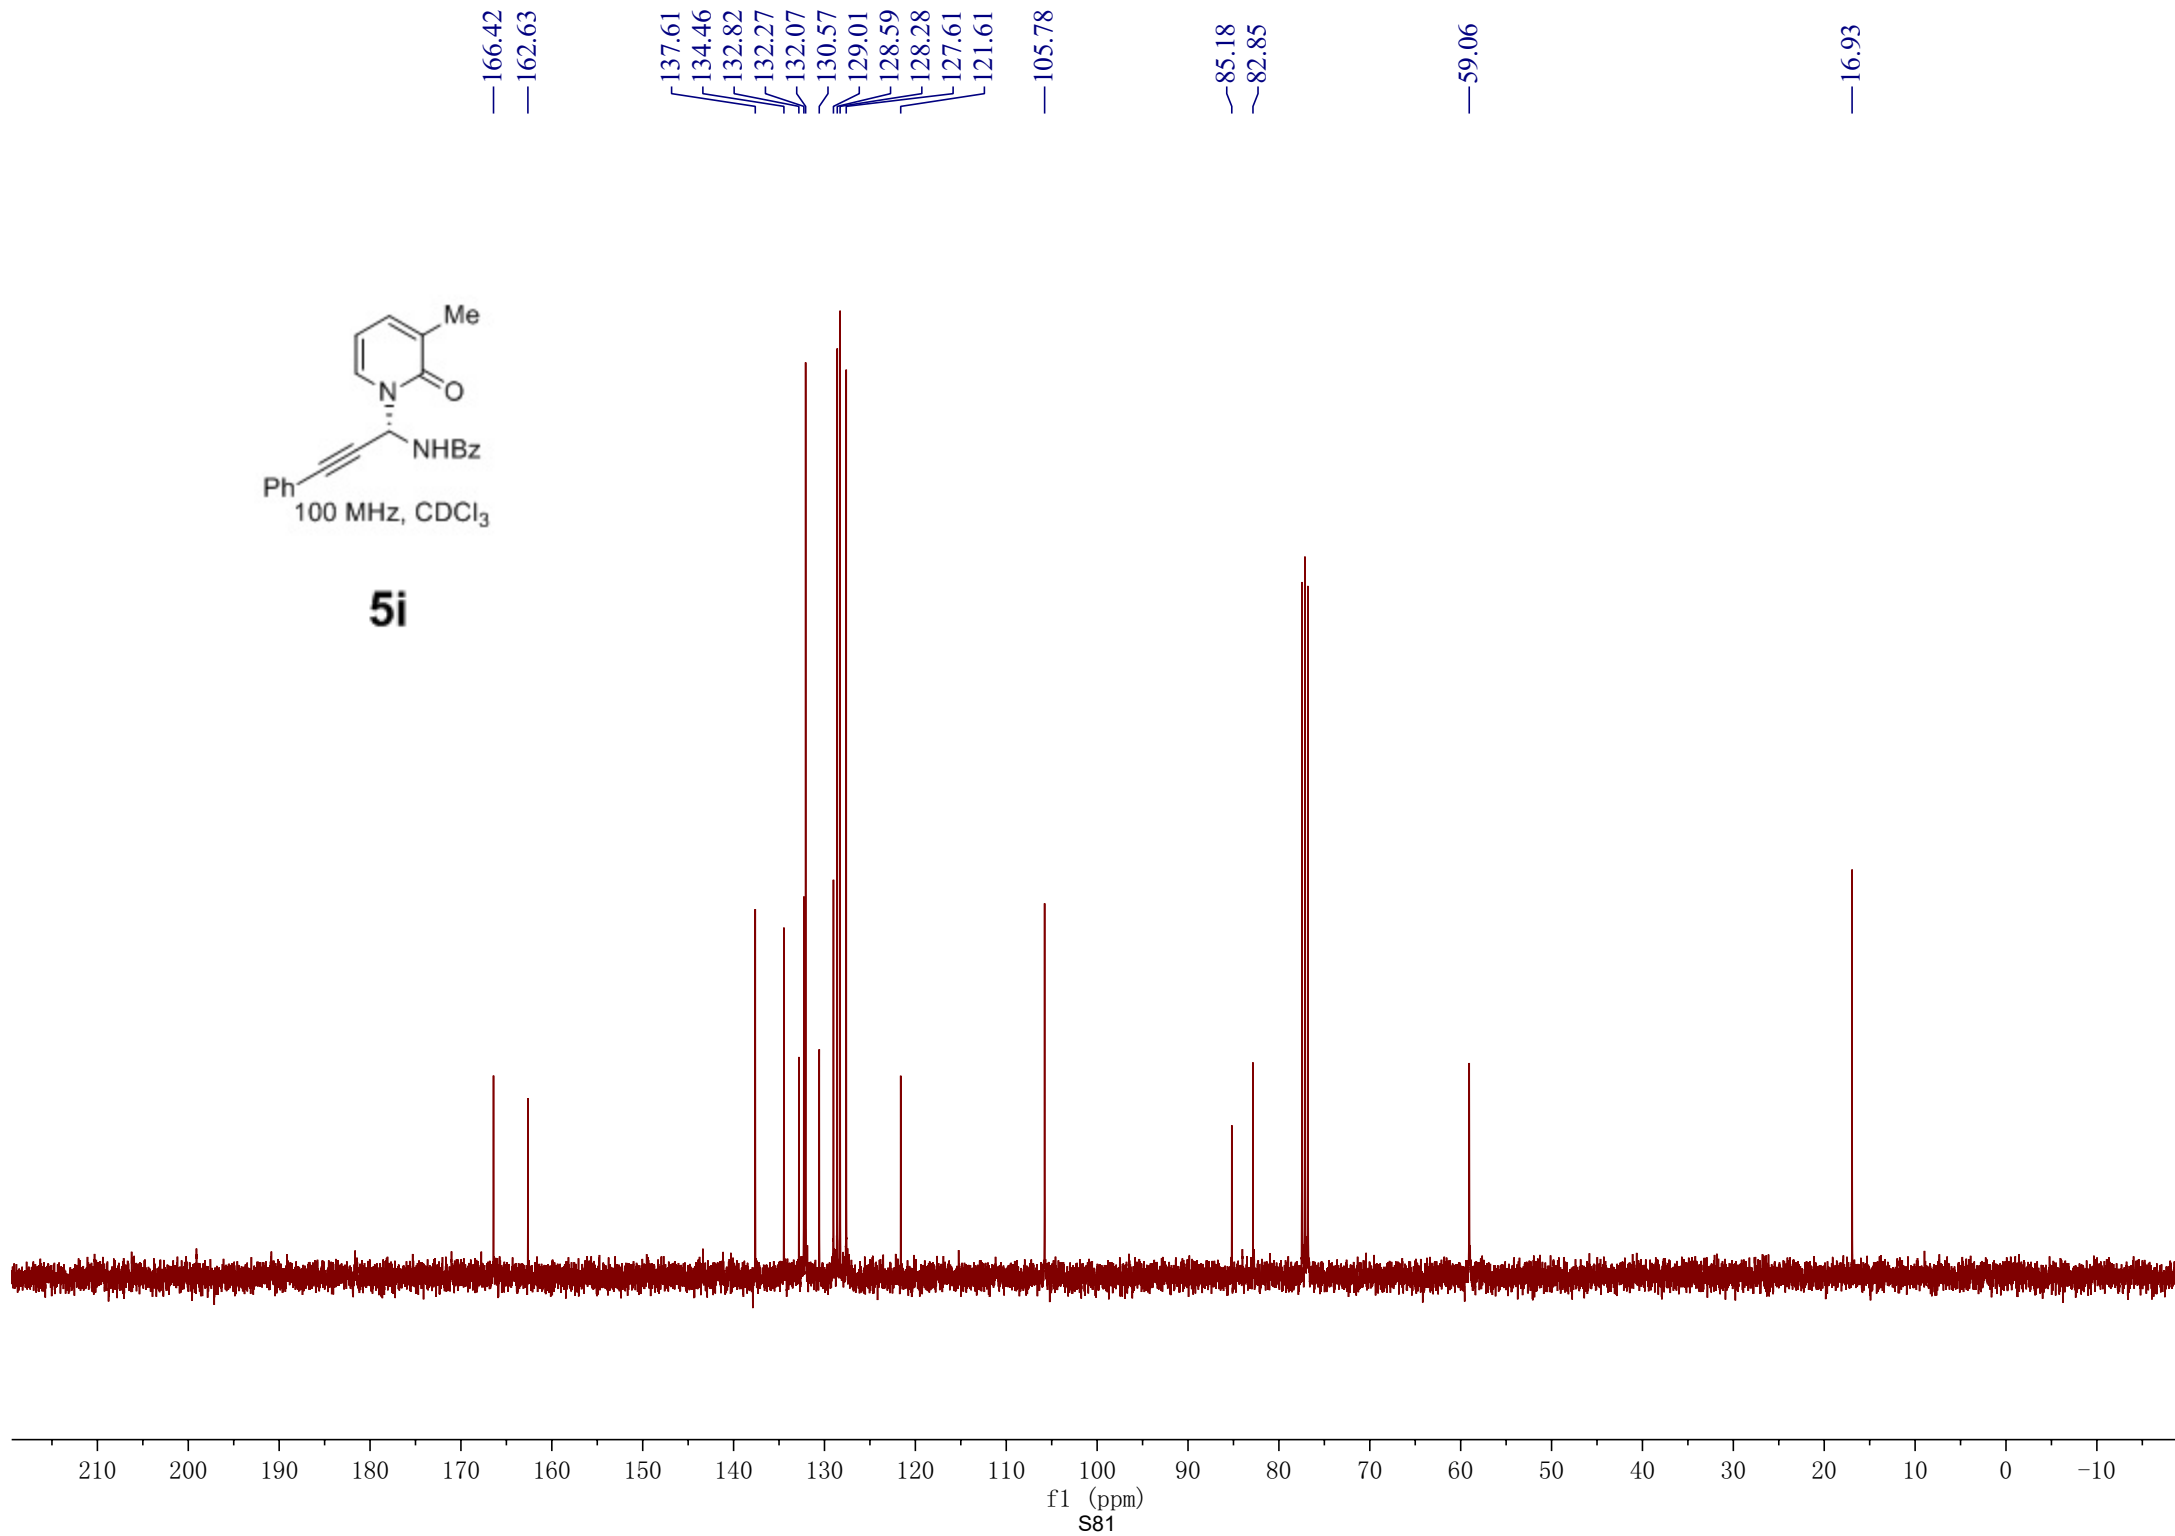

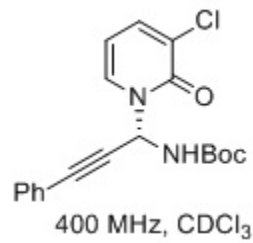

**5j**

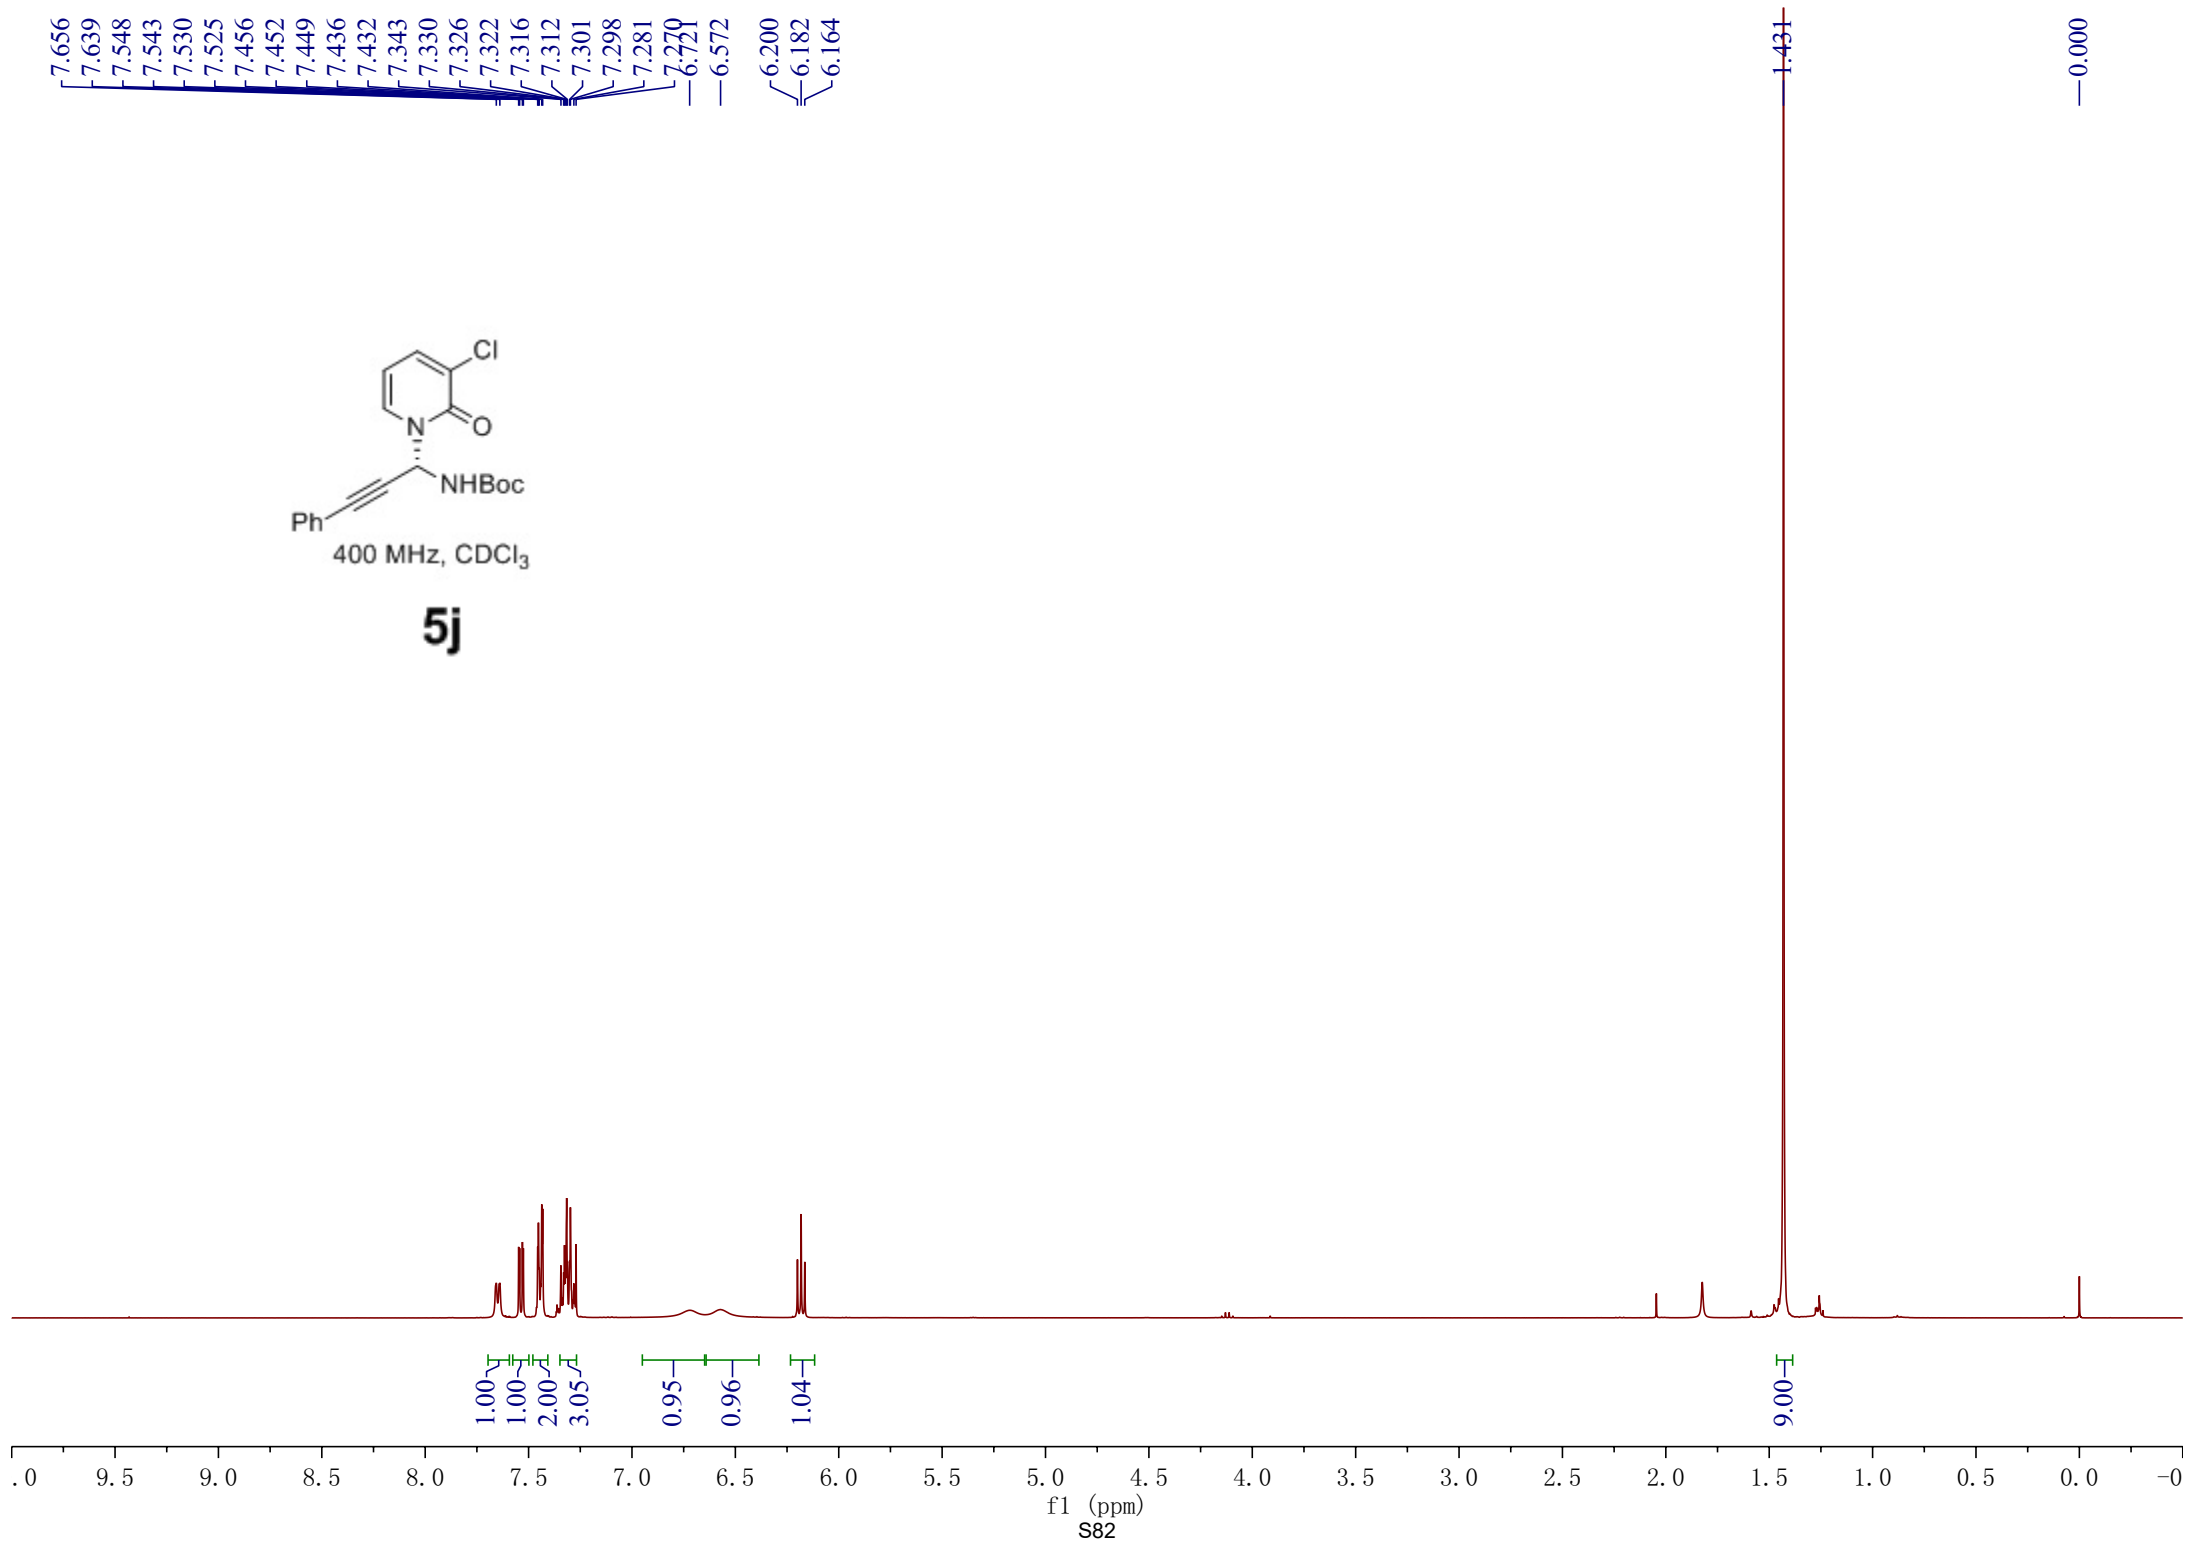

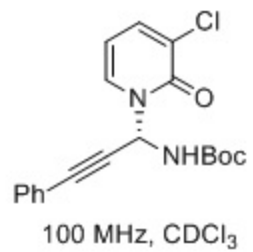

**5j**

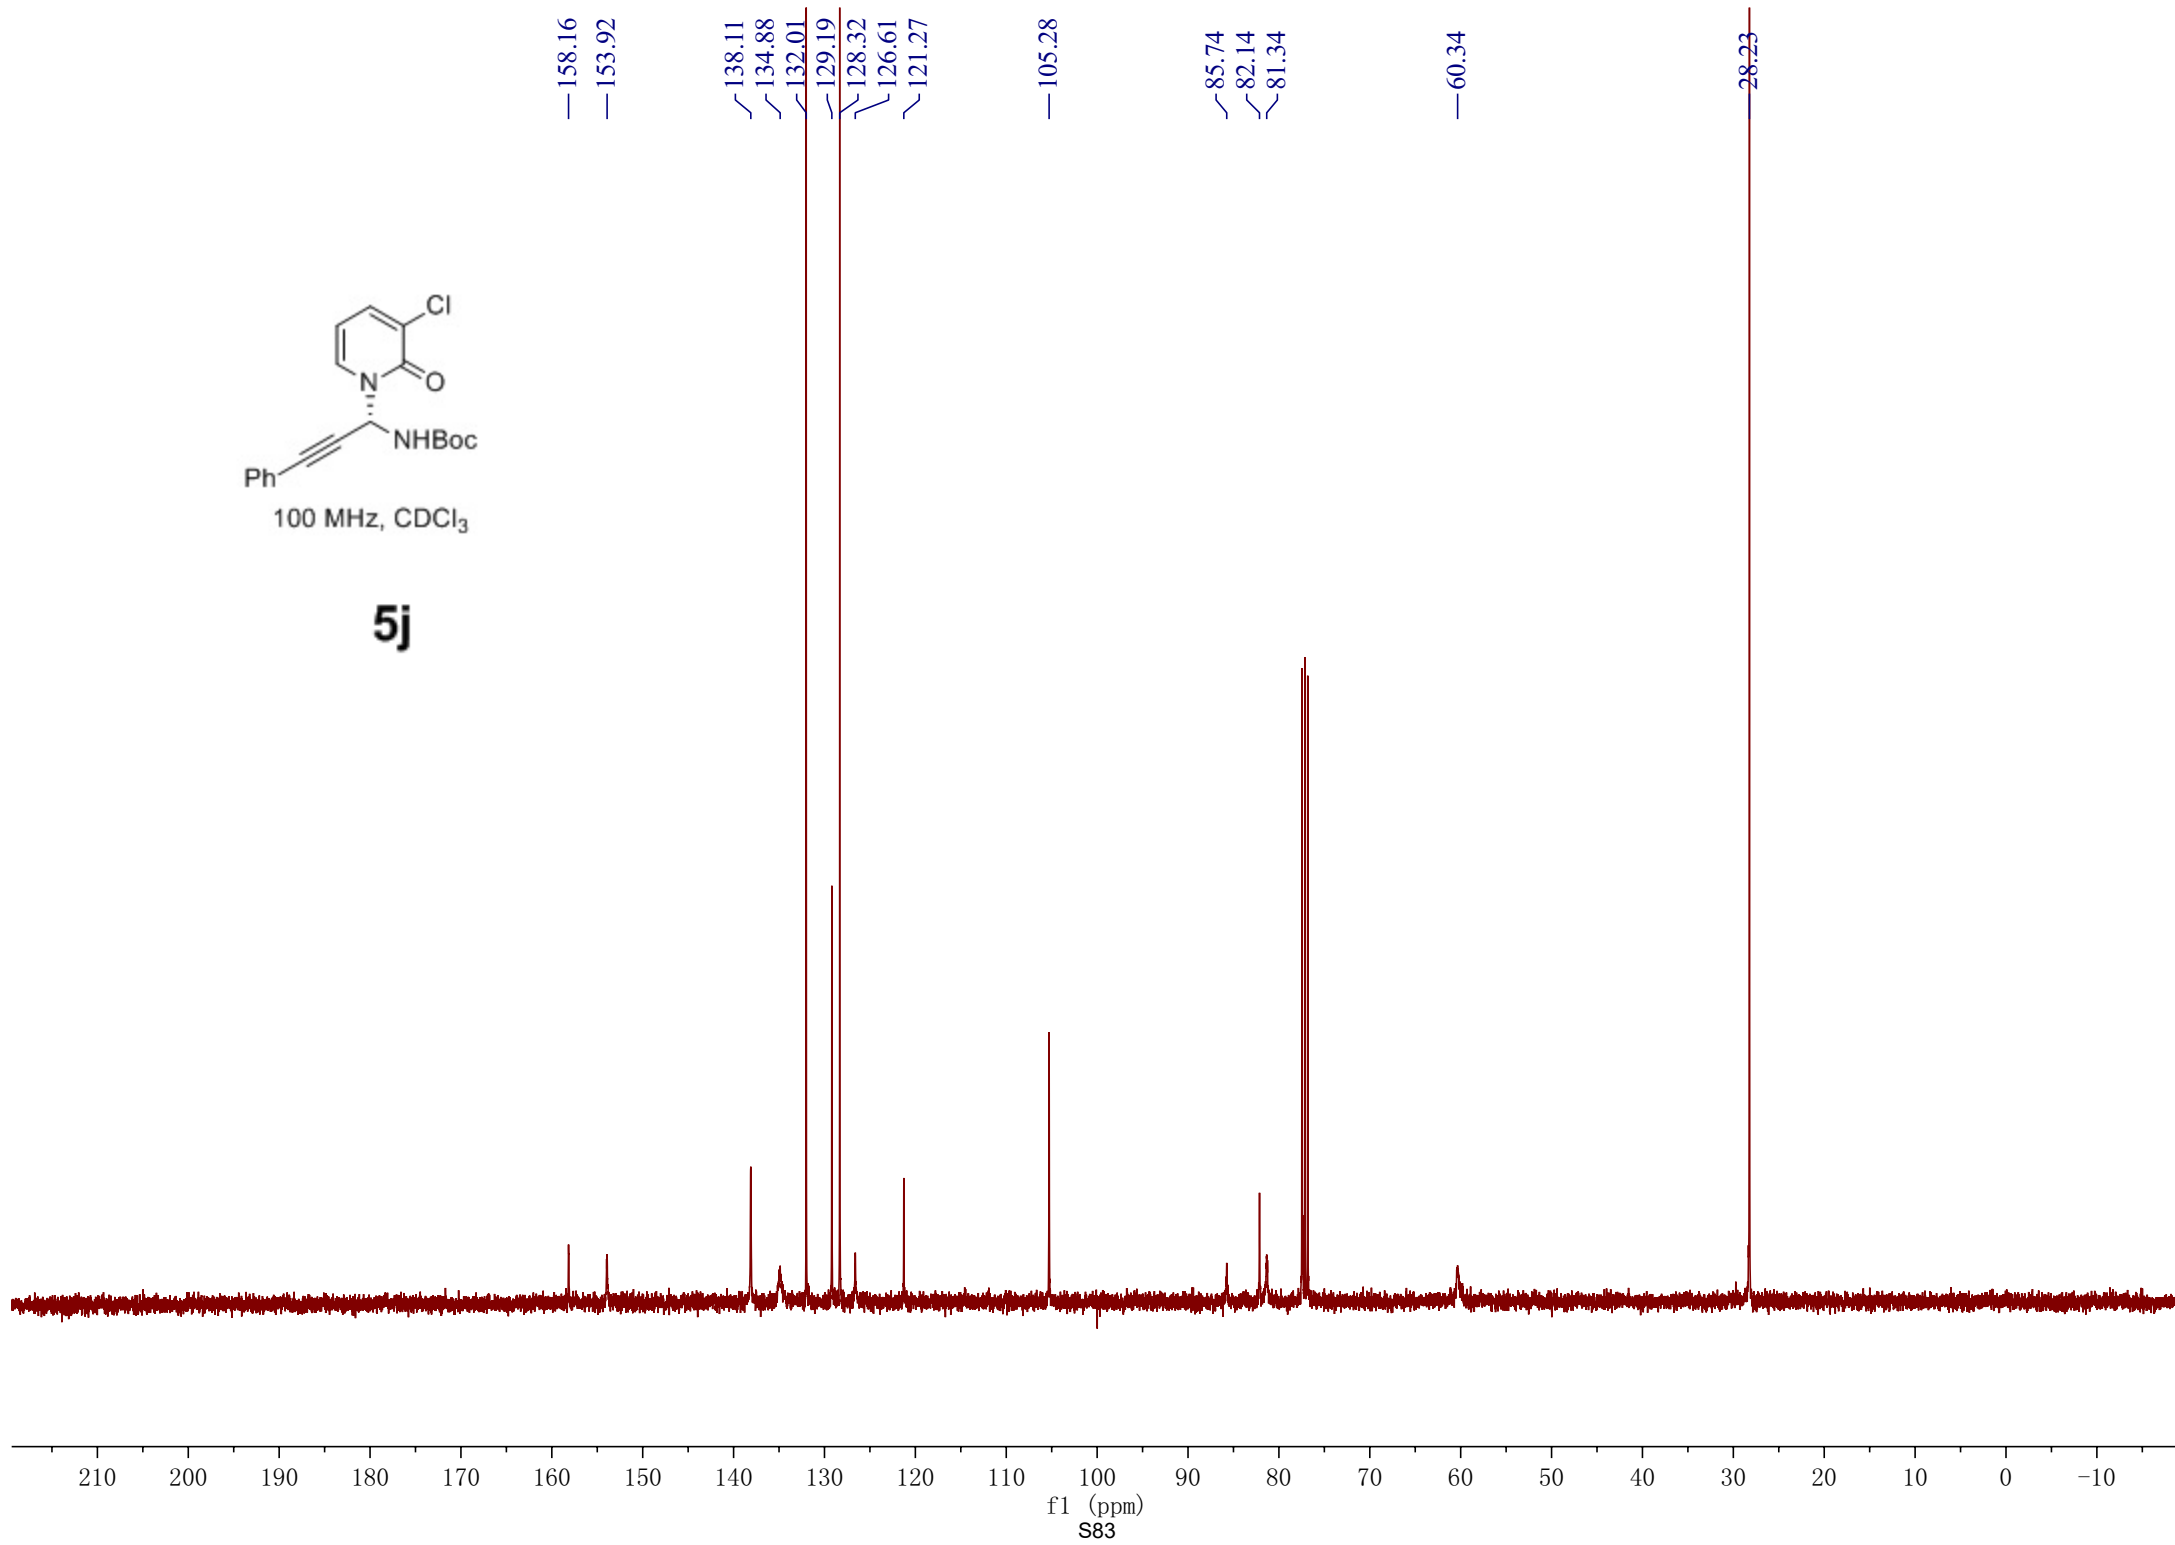

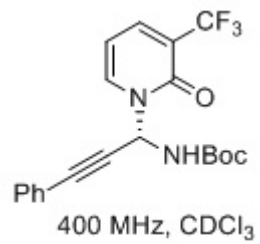

**5k**

8.064  
8.047  
7.751  
7.733  
7.411  
7.408  
7.301  
7.282  
6.813  
6.298  
6.281  
6.264  
-0.000

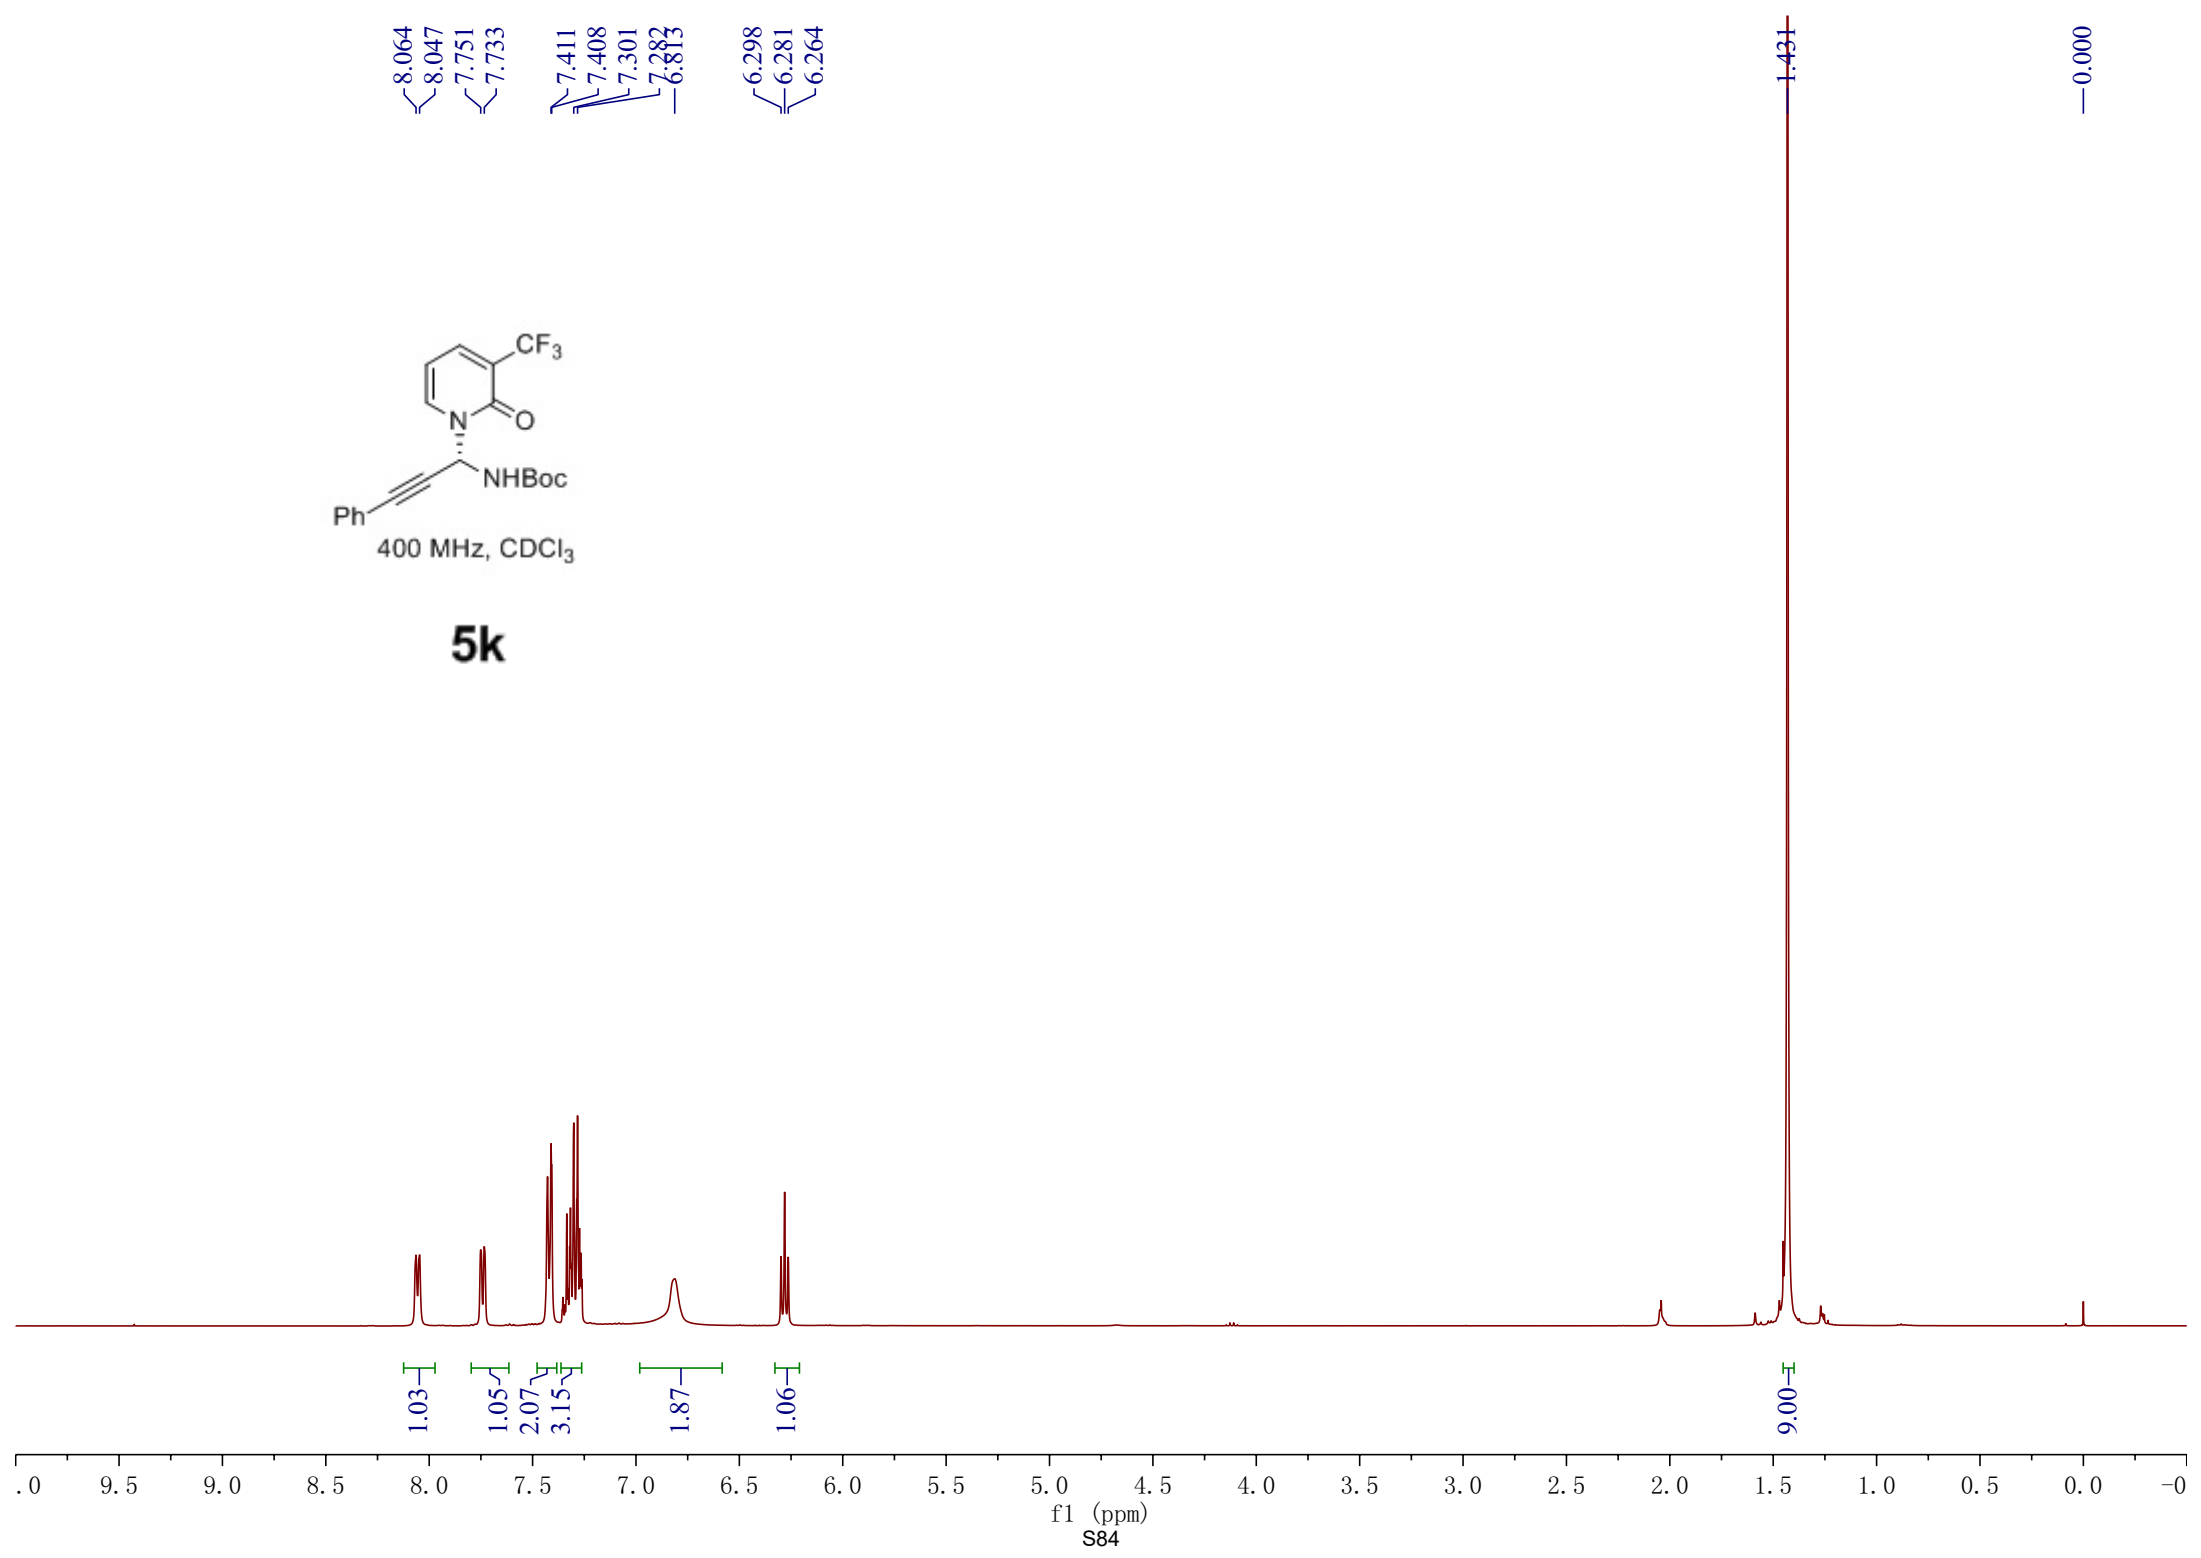

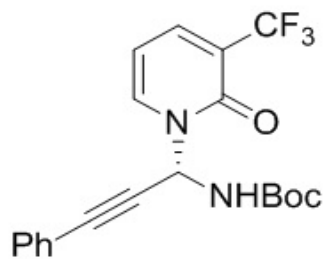

75 MHz, DMSO-d6

**5k**

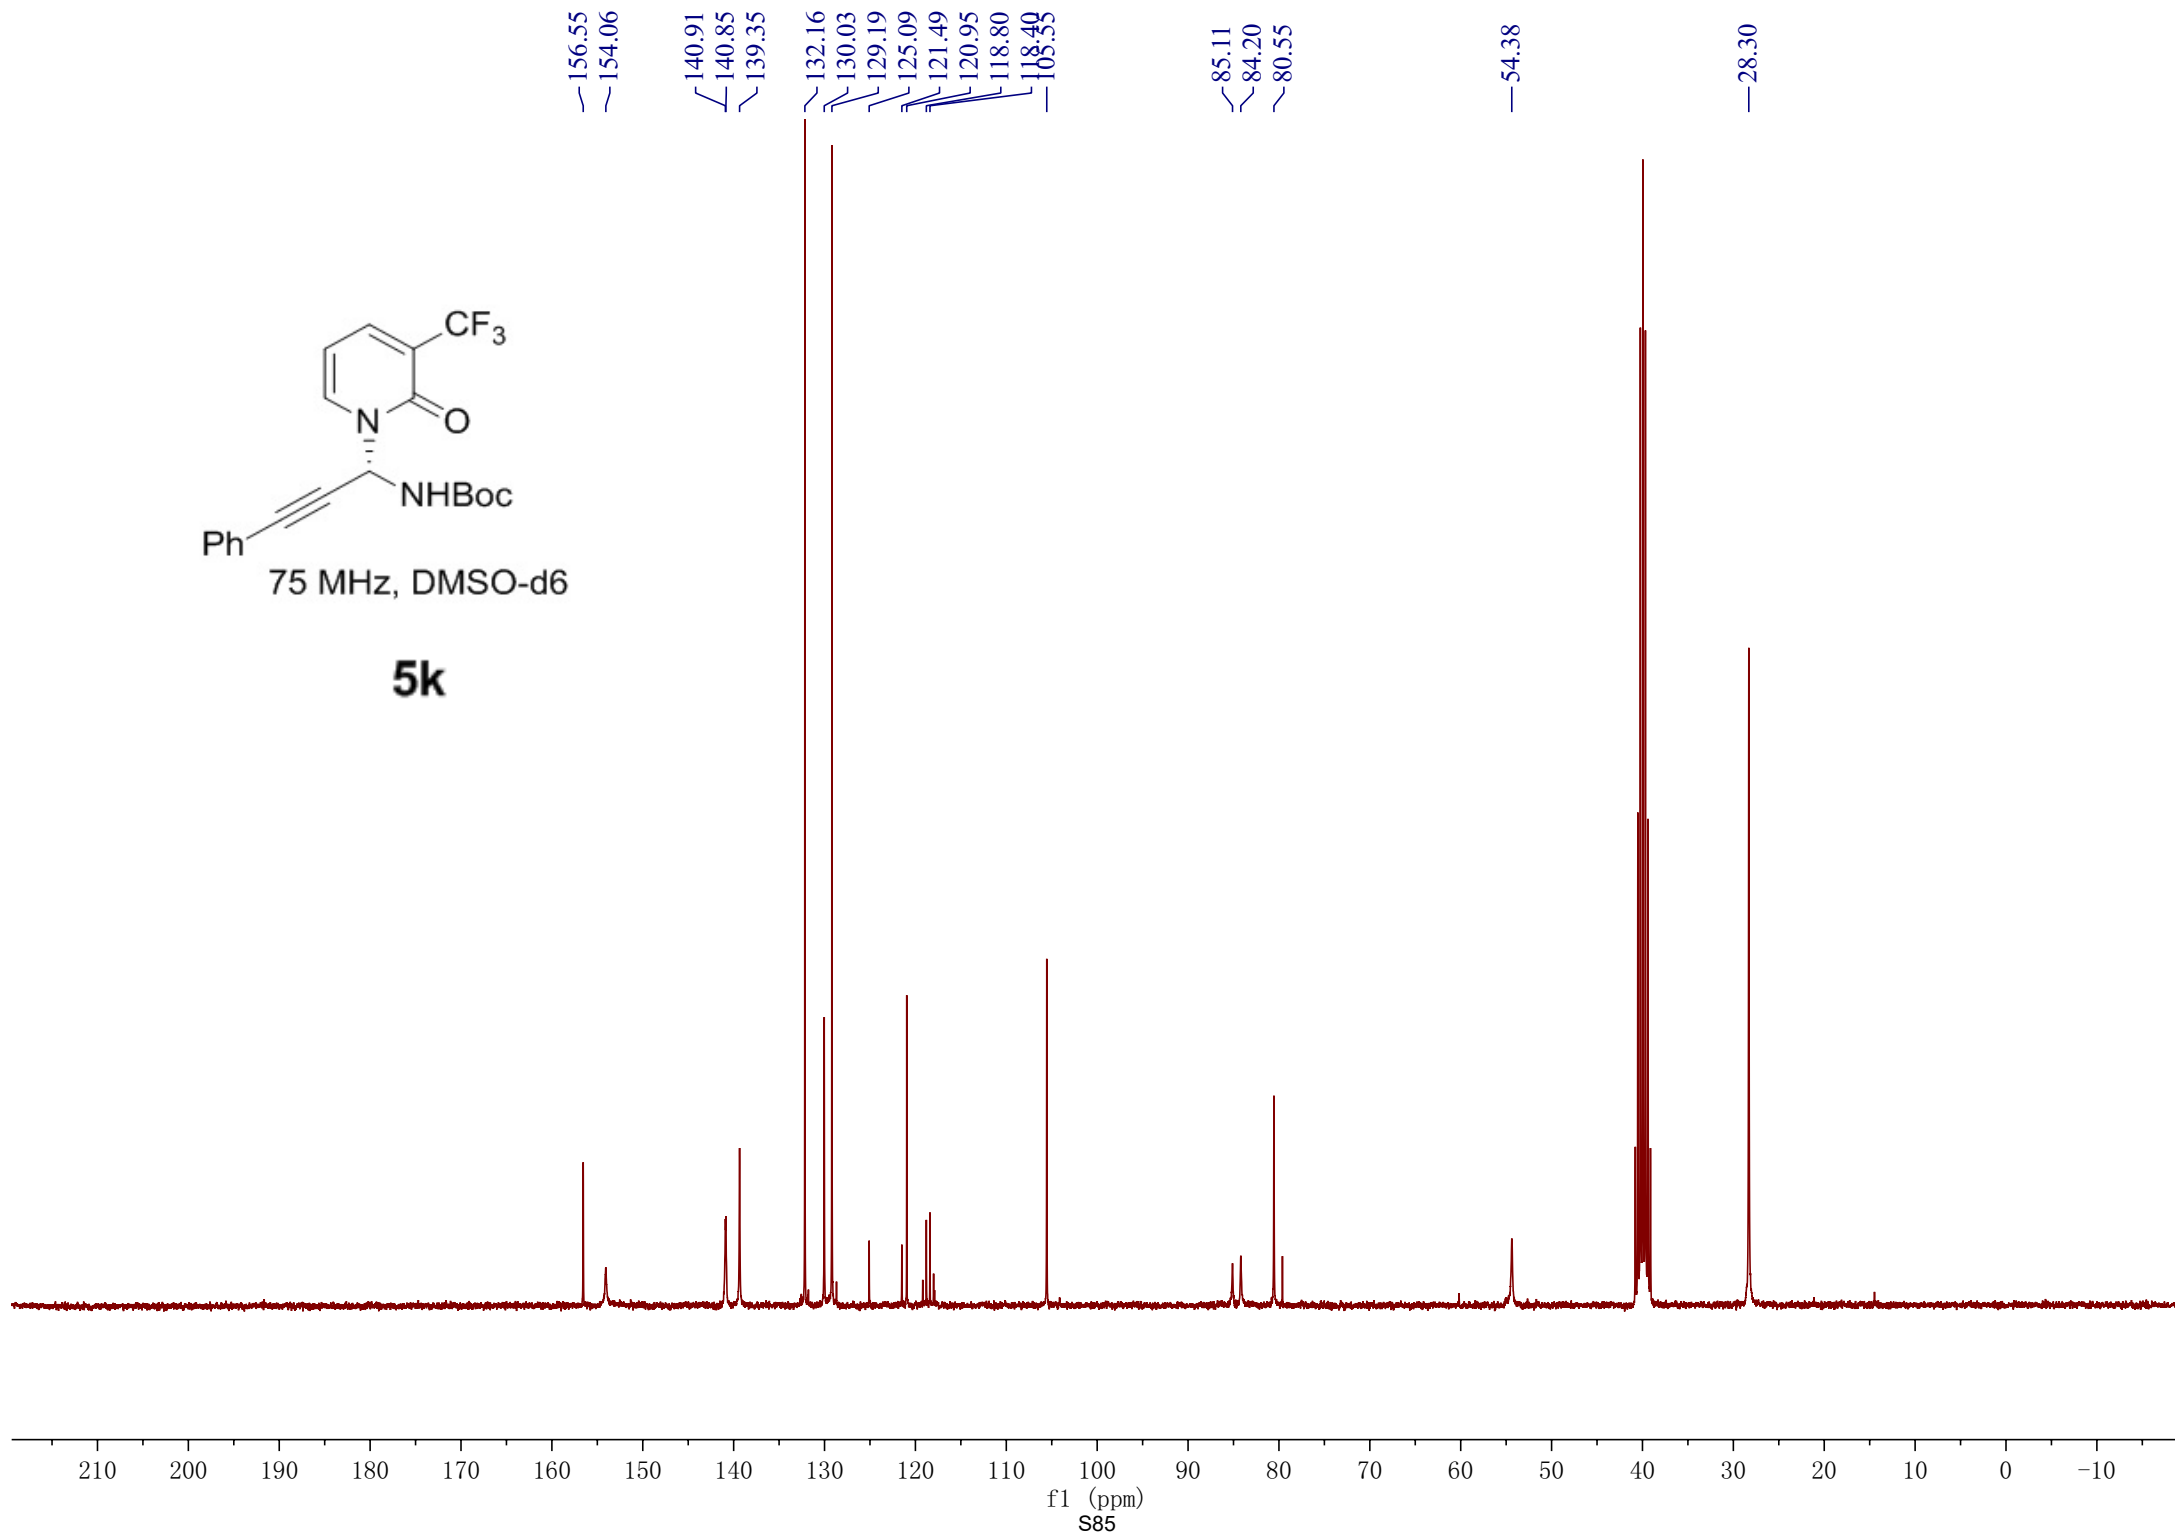

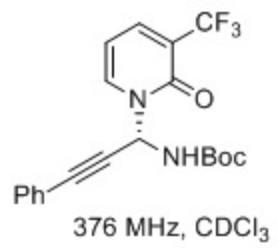

**5k**

70.219

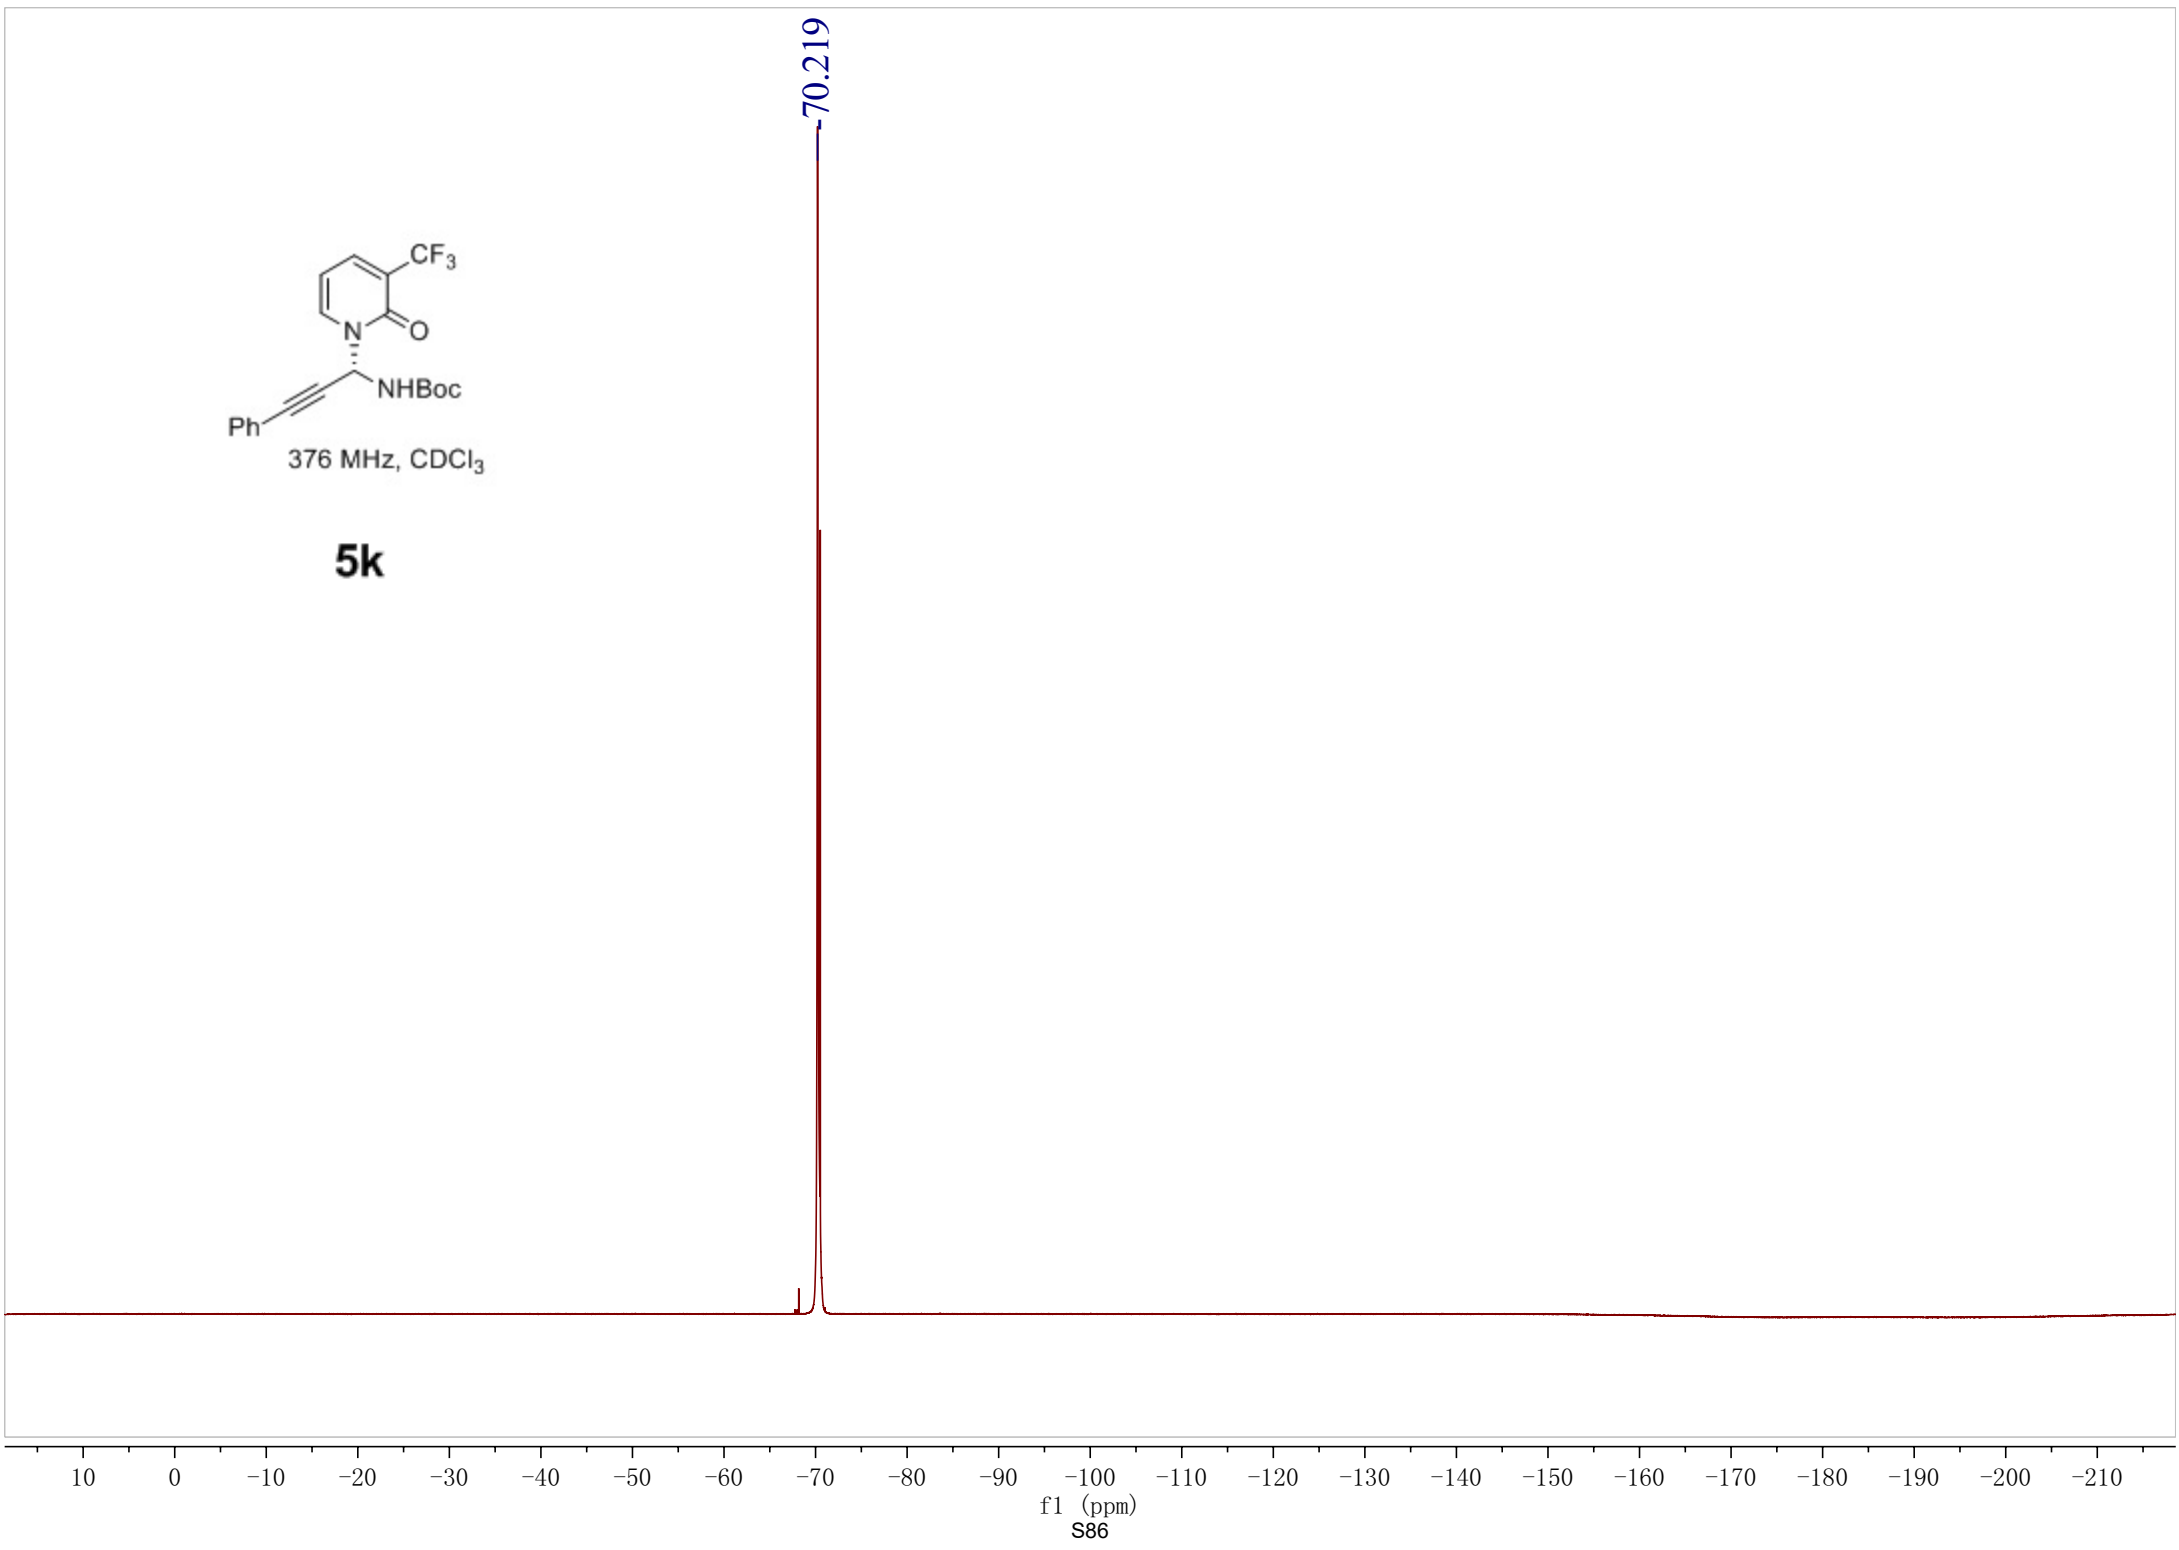



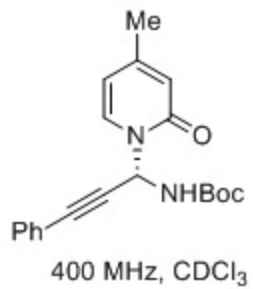

**5I**

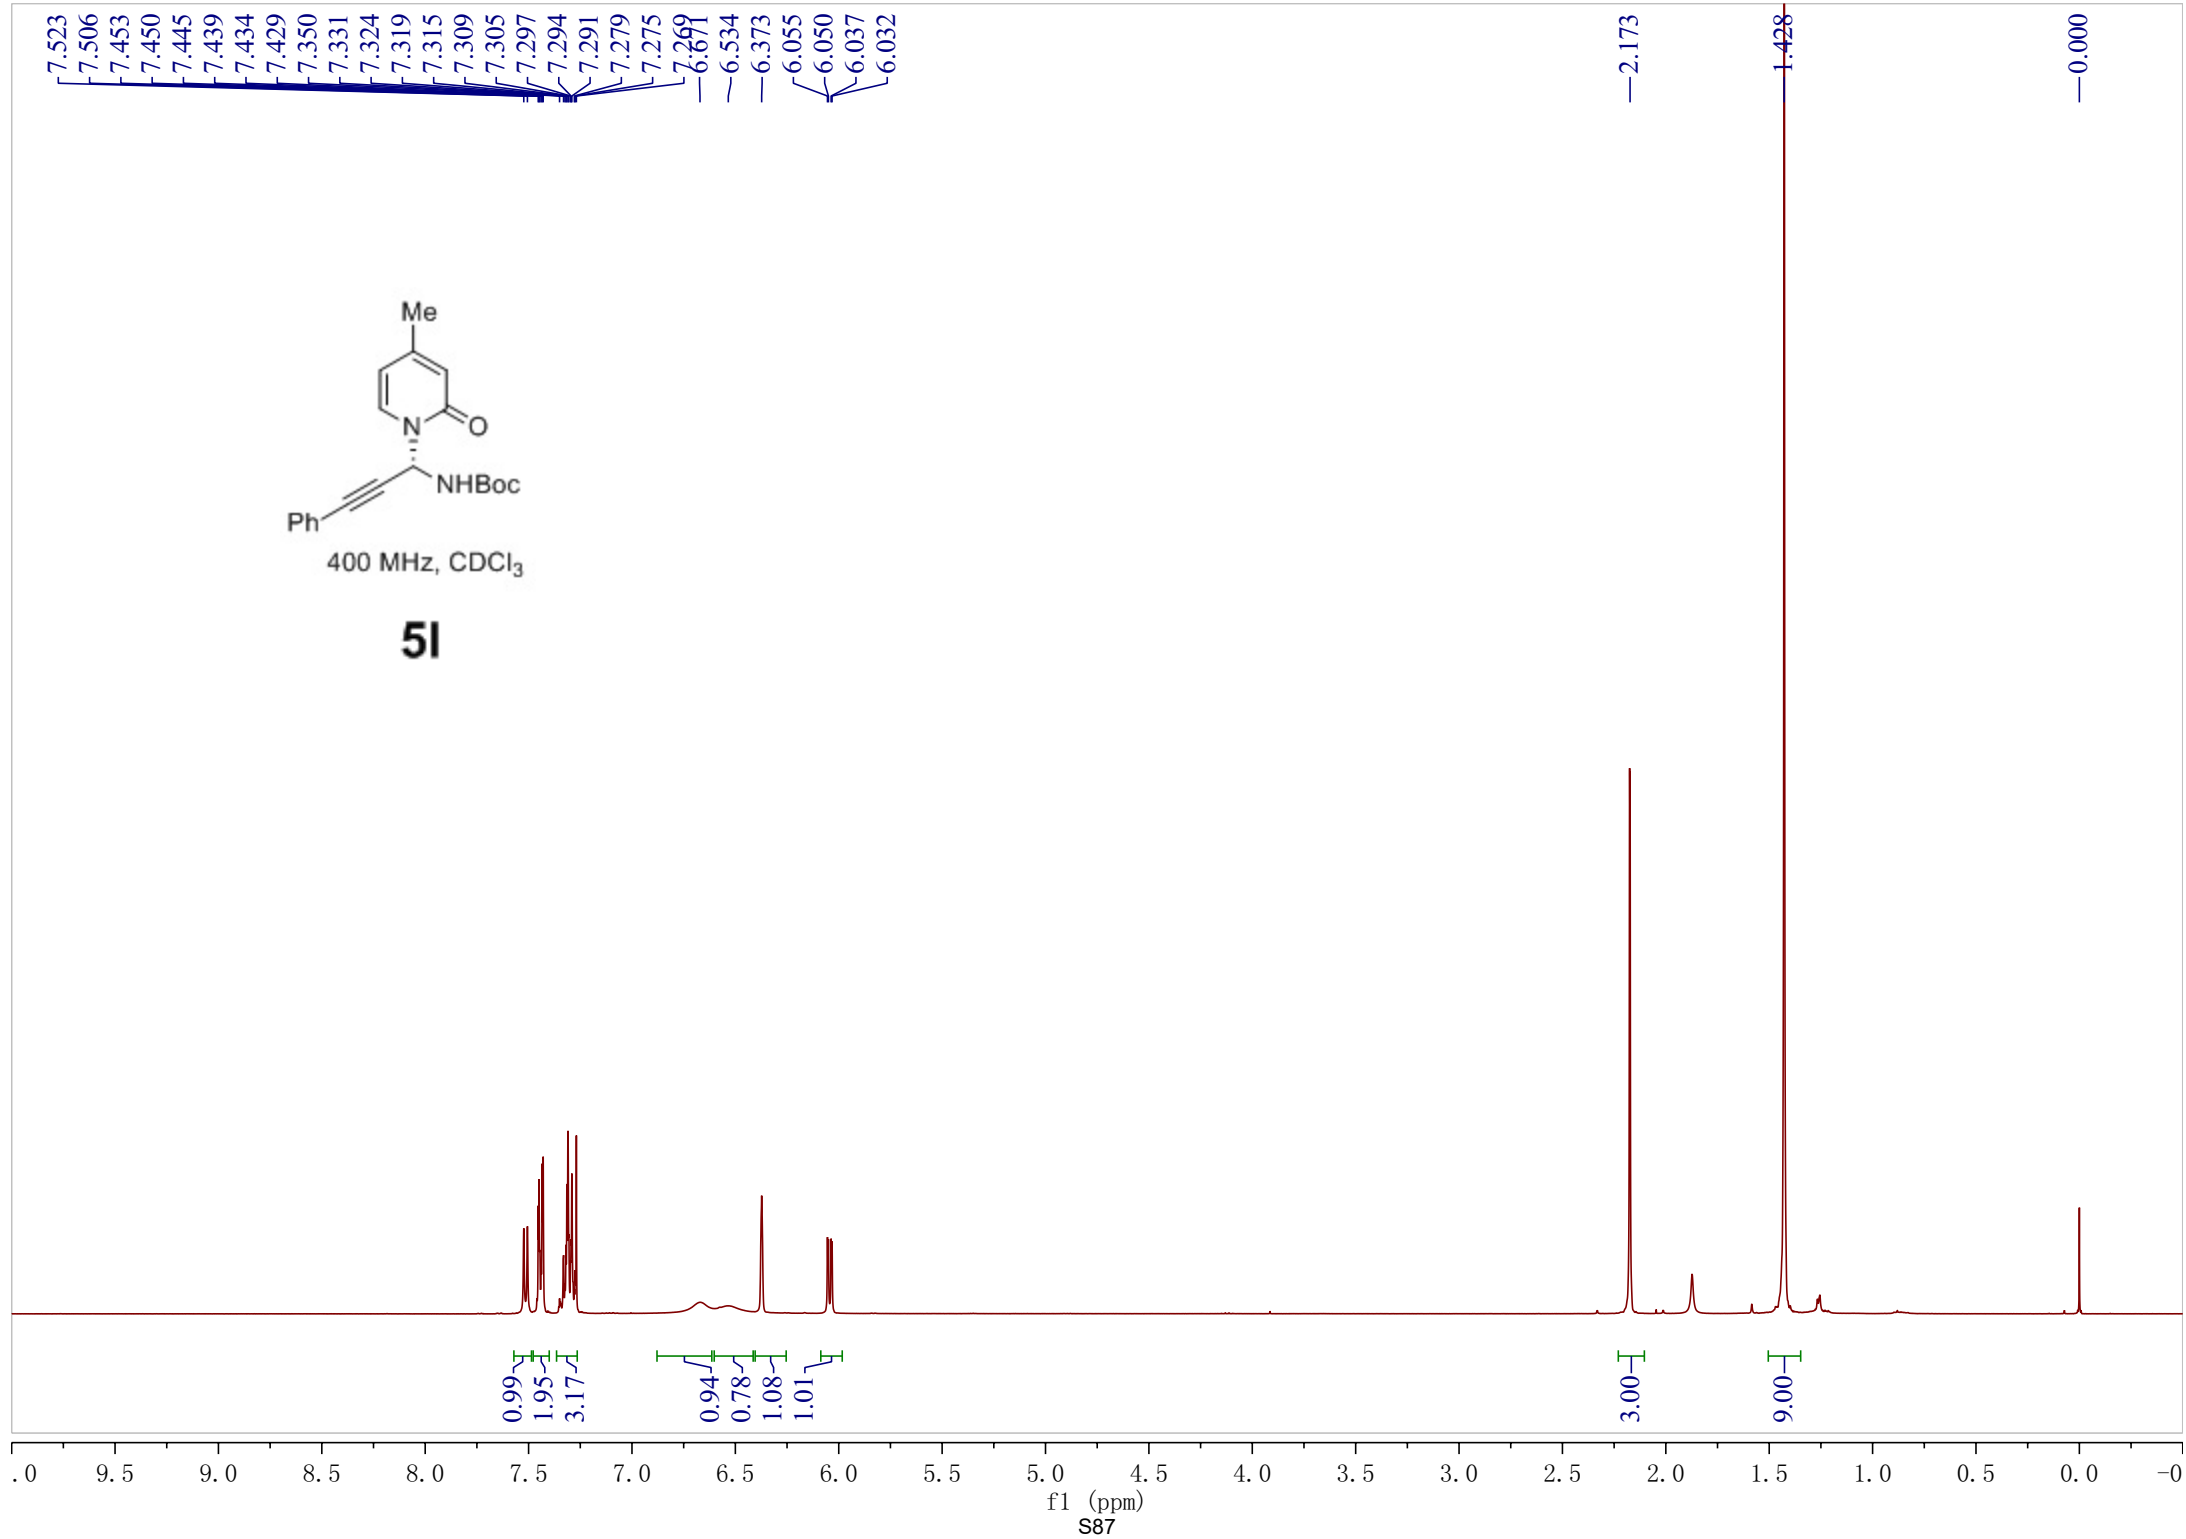

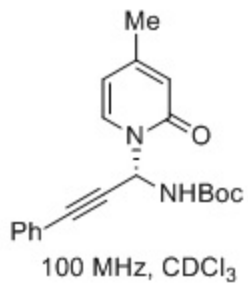

**51**

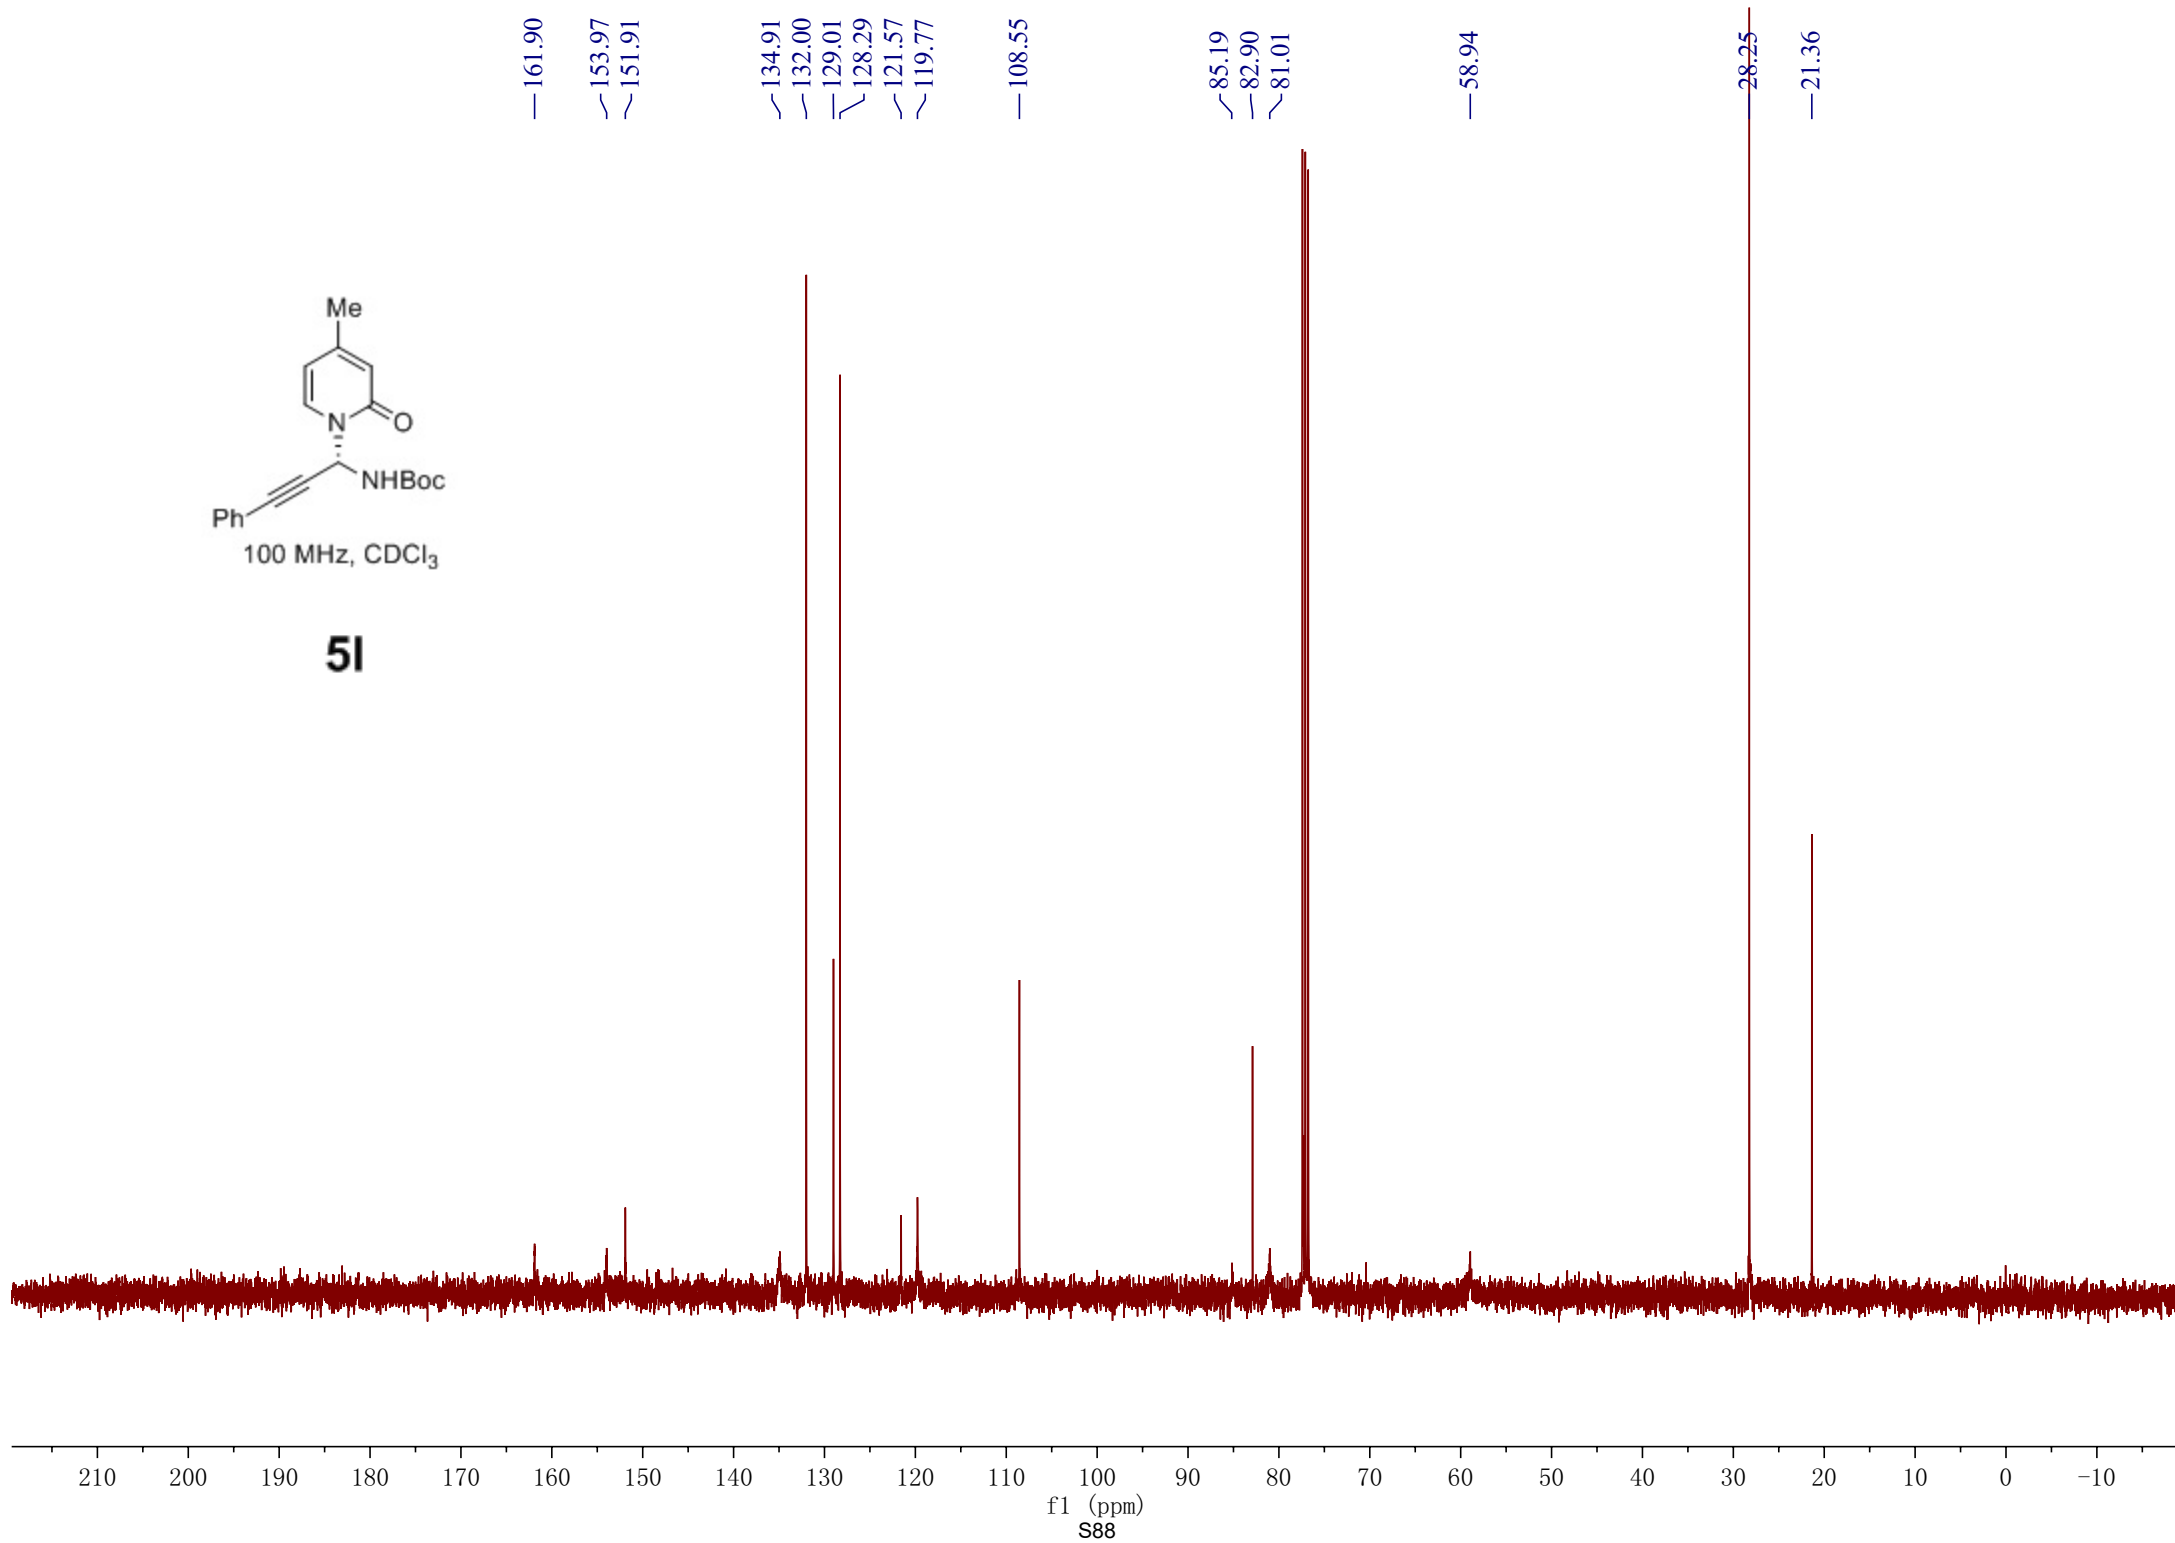

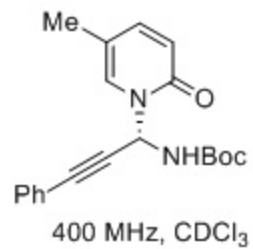

5m

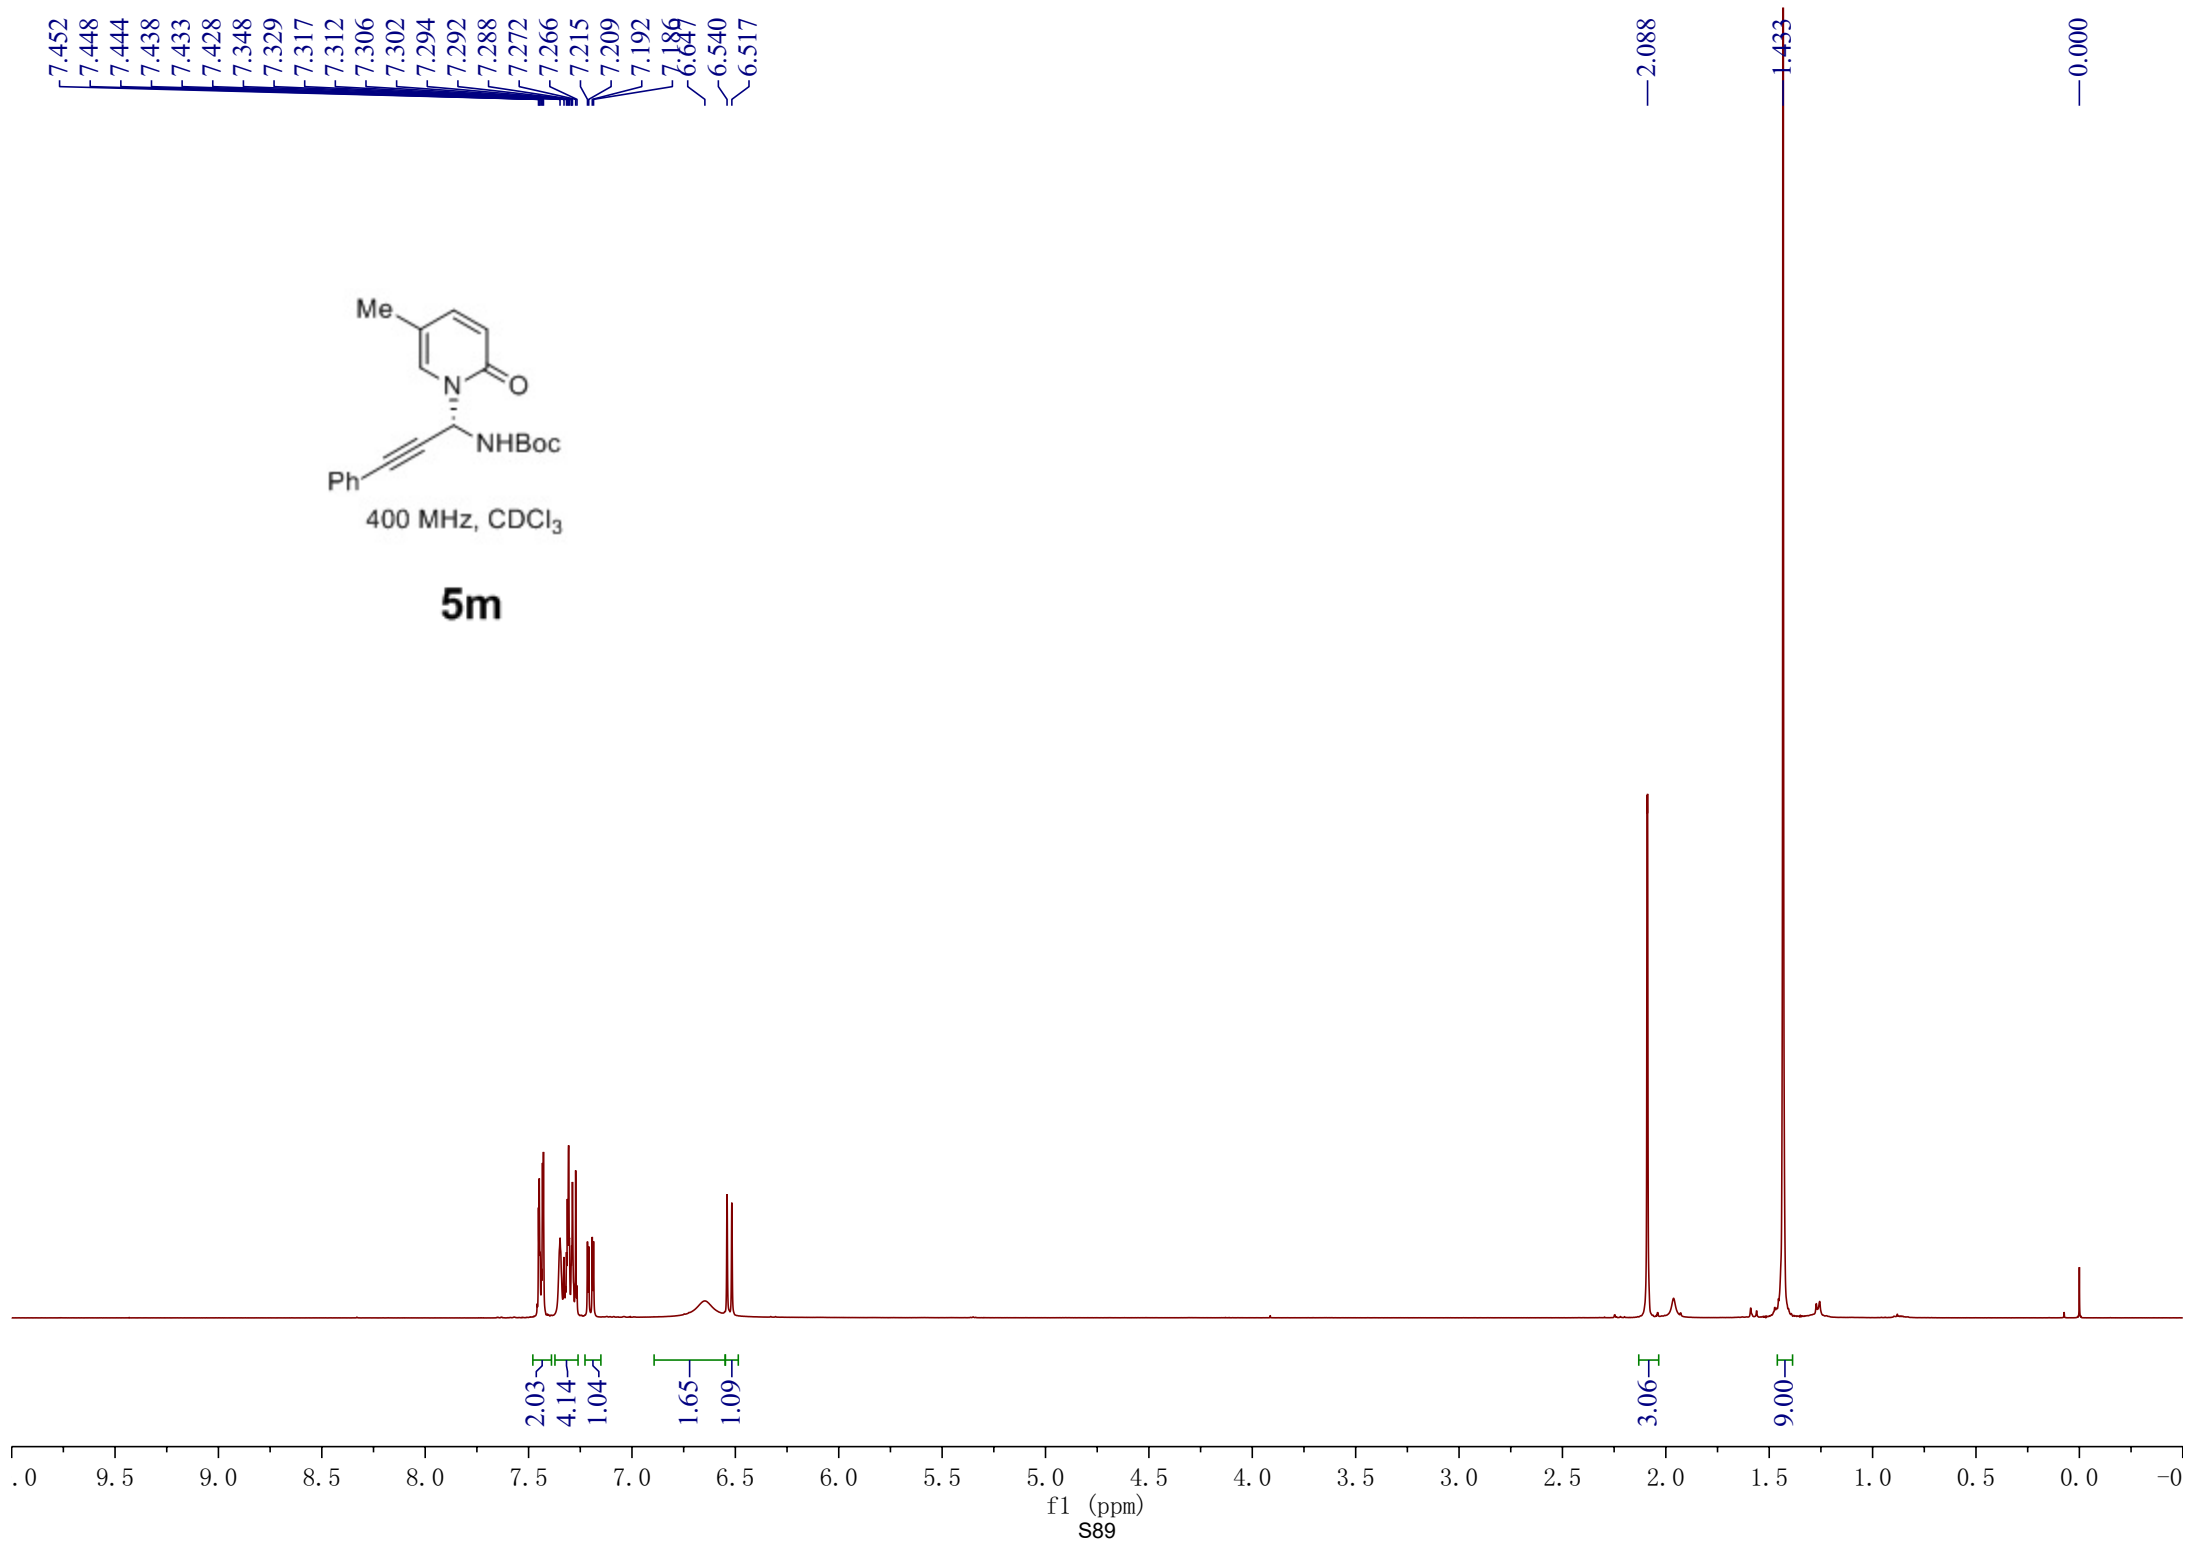

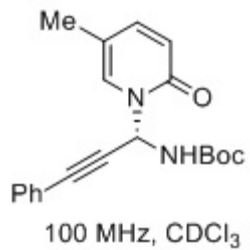

5m

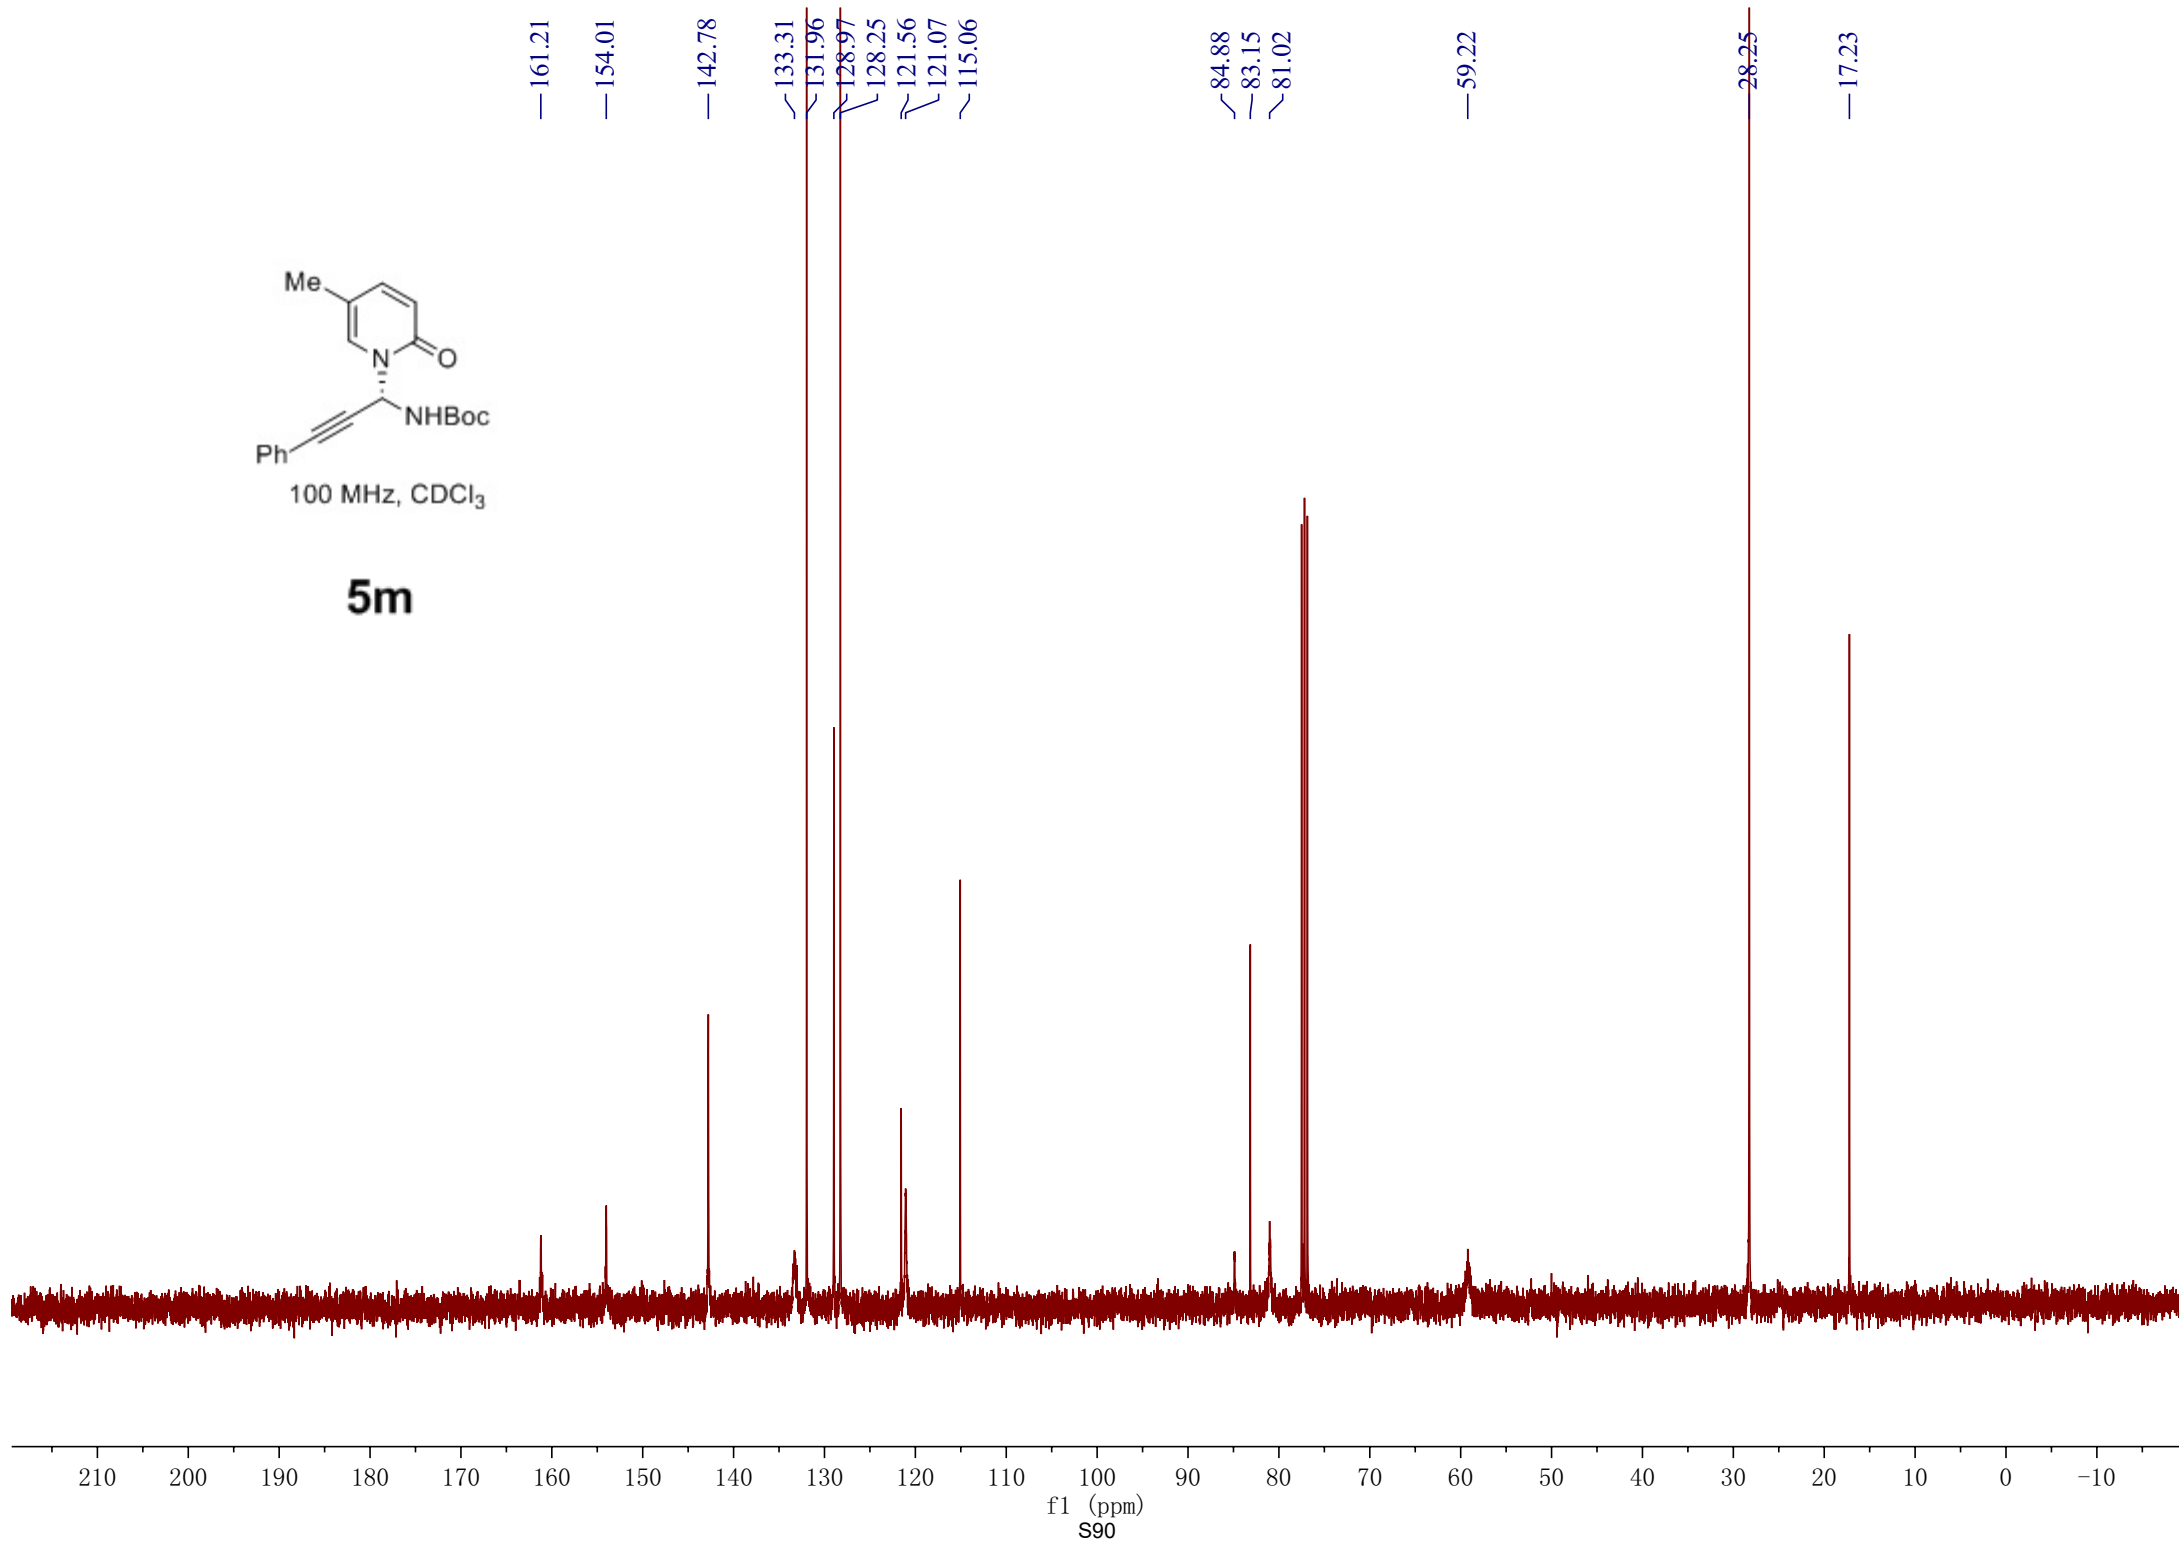

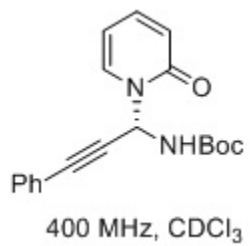

**5n**

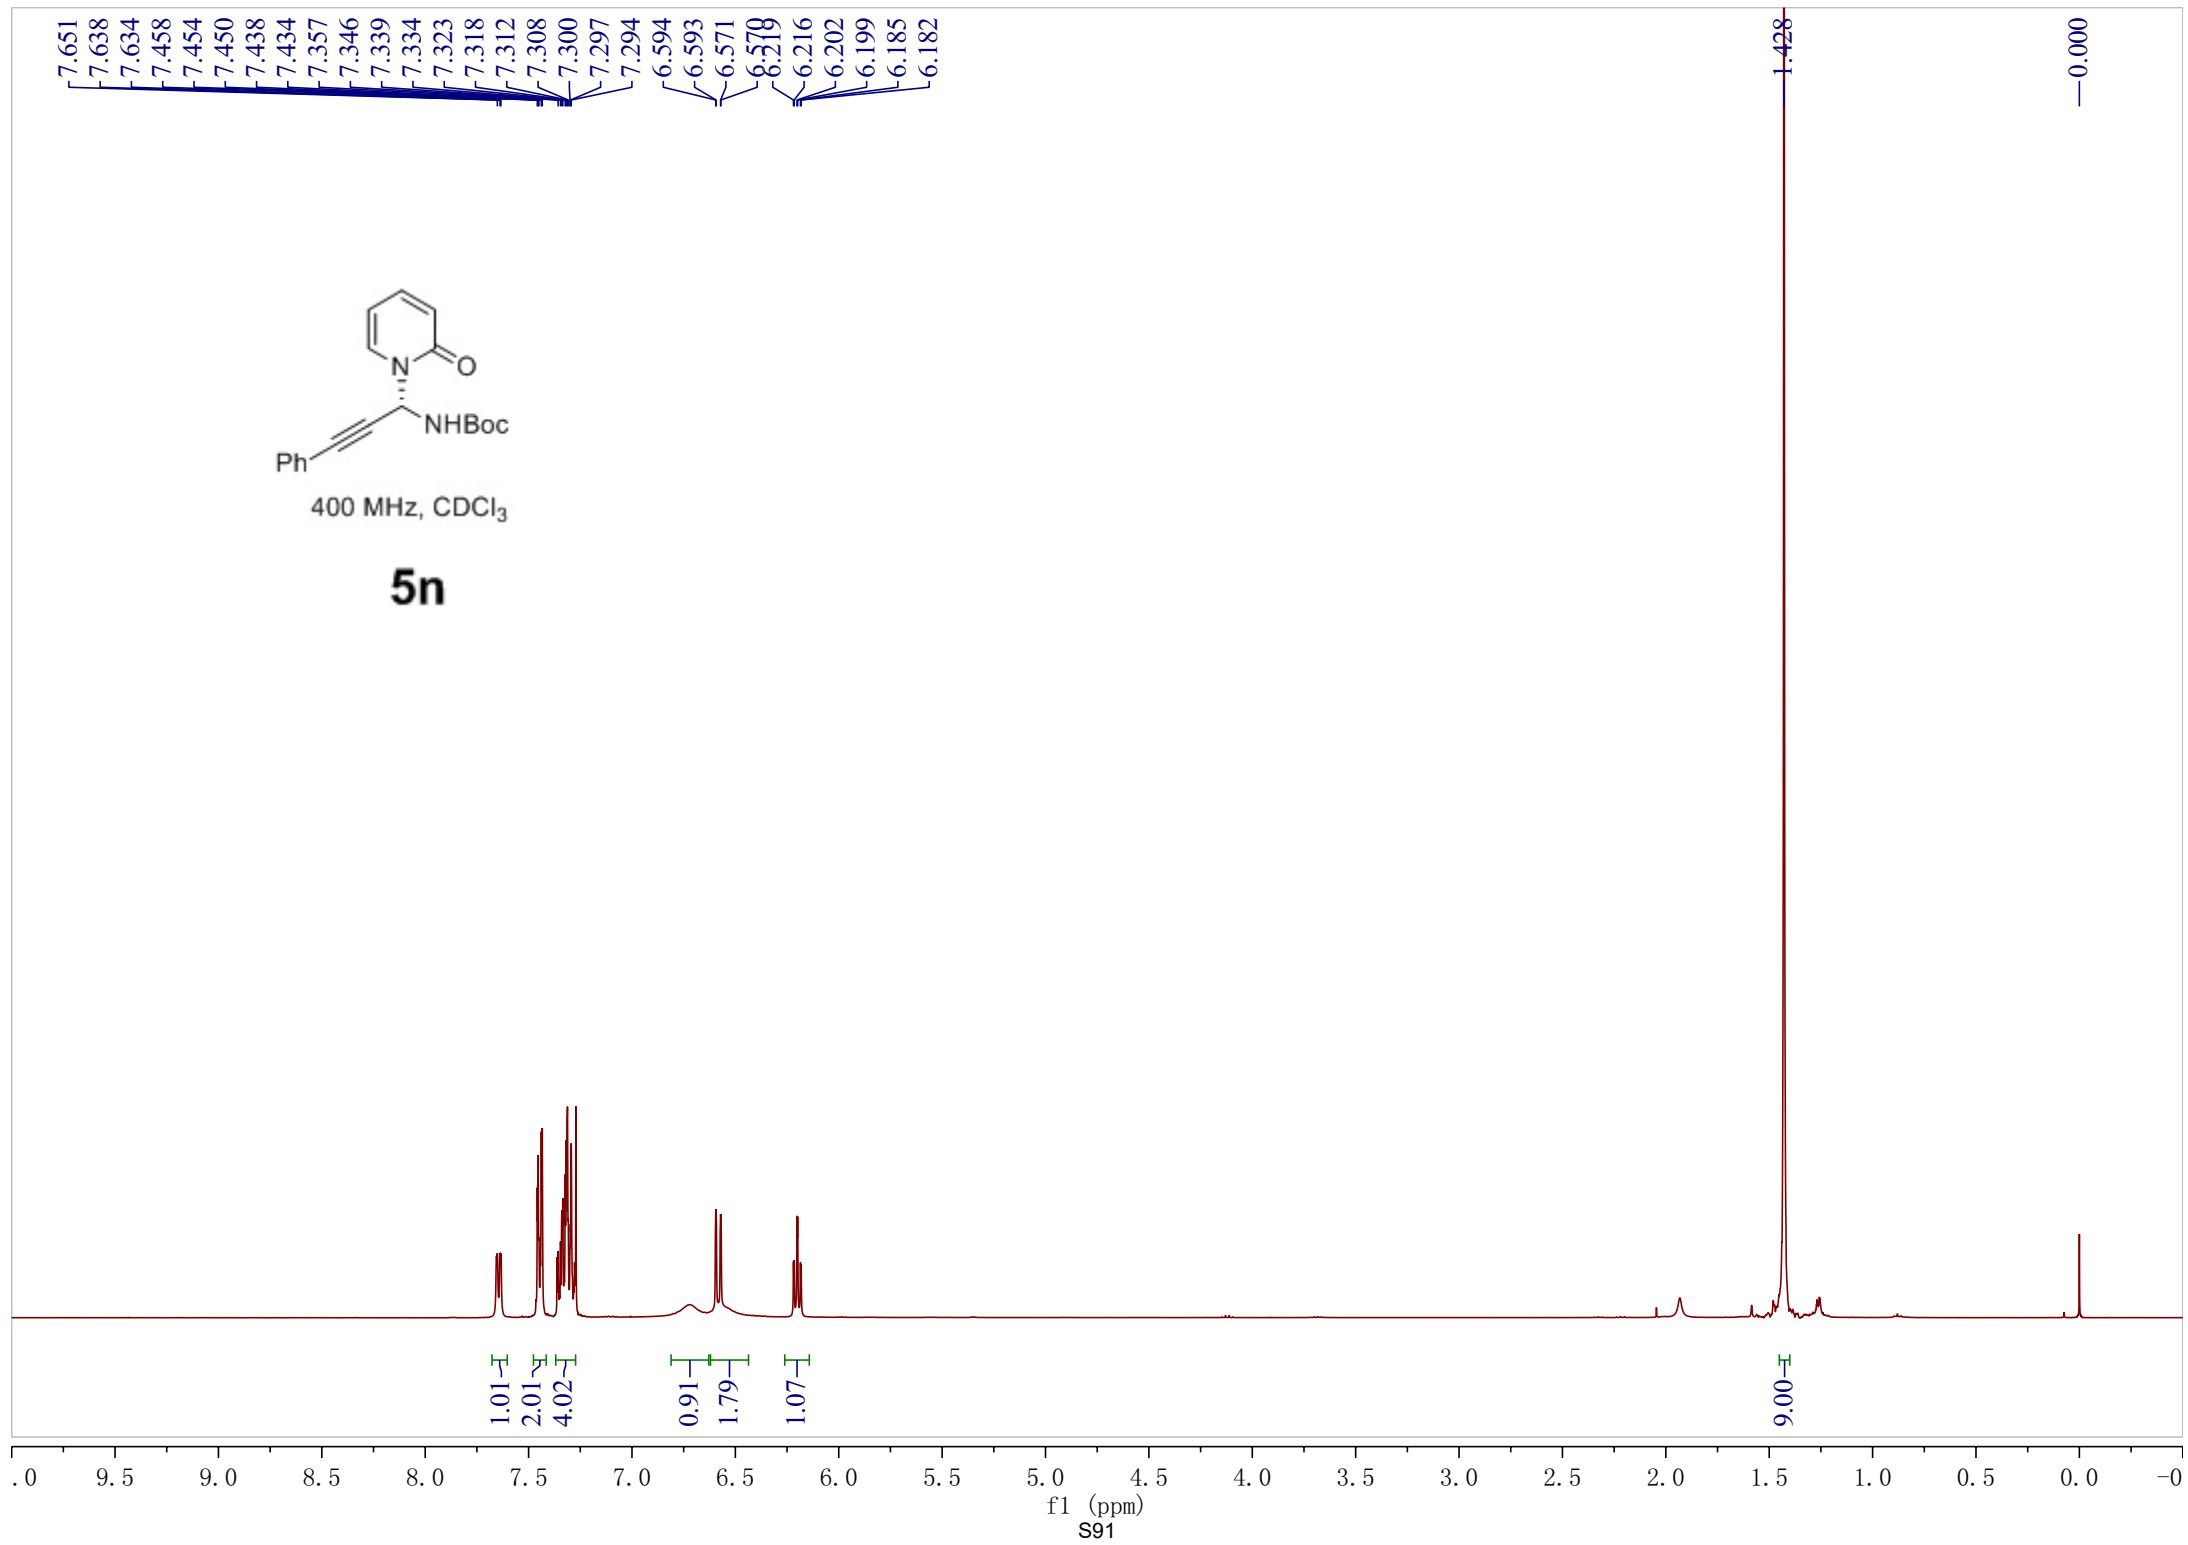

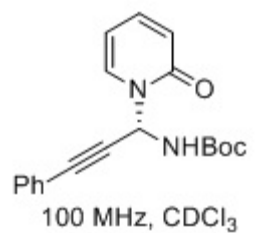

**5n**

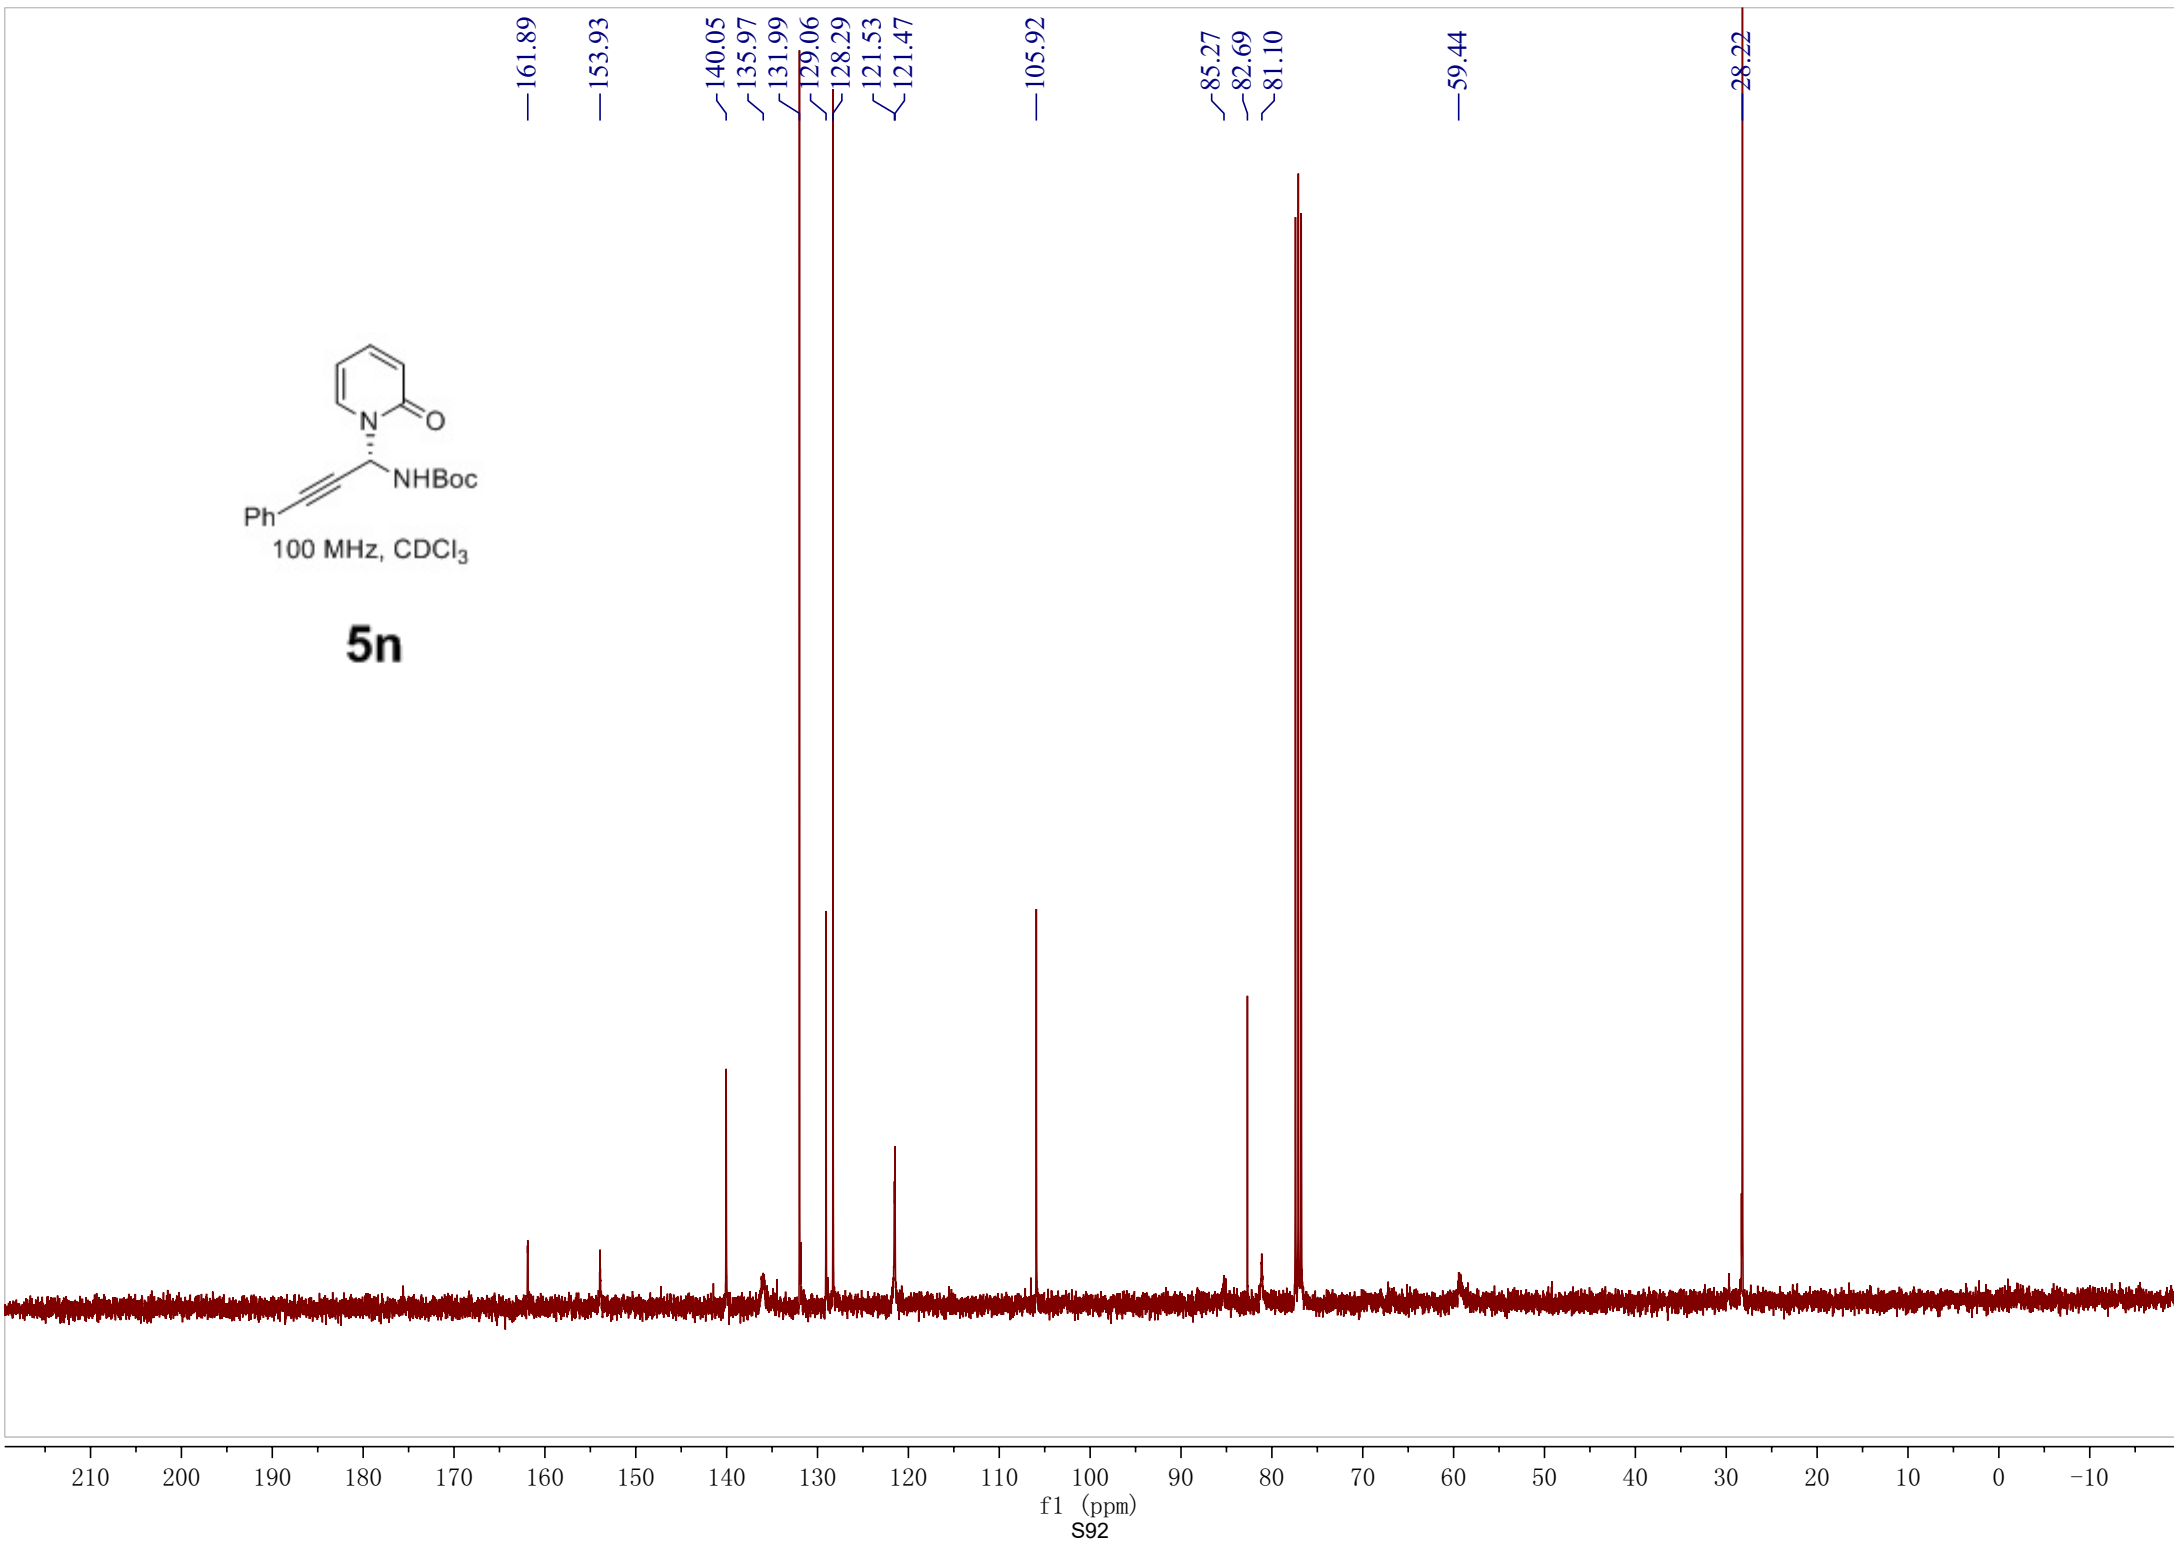

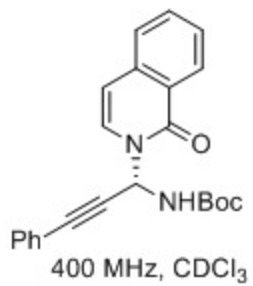

**5o**

8.464  
8.462  
8.461  
8.443  
8.442  
8.440  
7.450  
7.435  
7.430  
7.397  
7.309  
7.304  
7.286  
6.886  
6.545  
6.526  
6.454

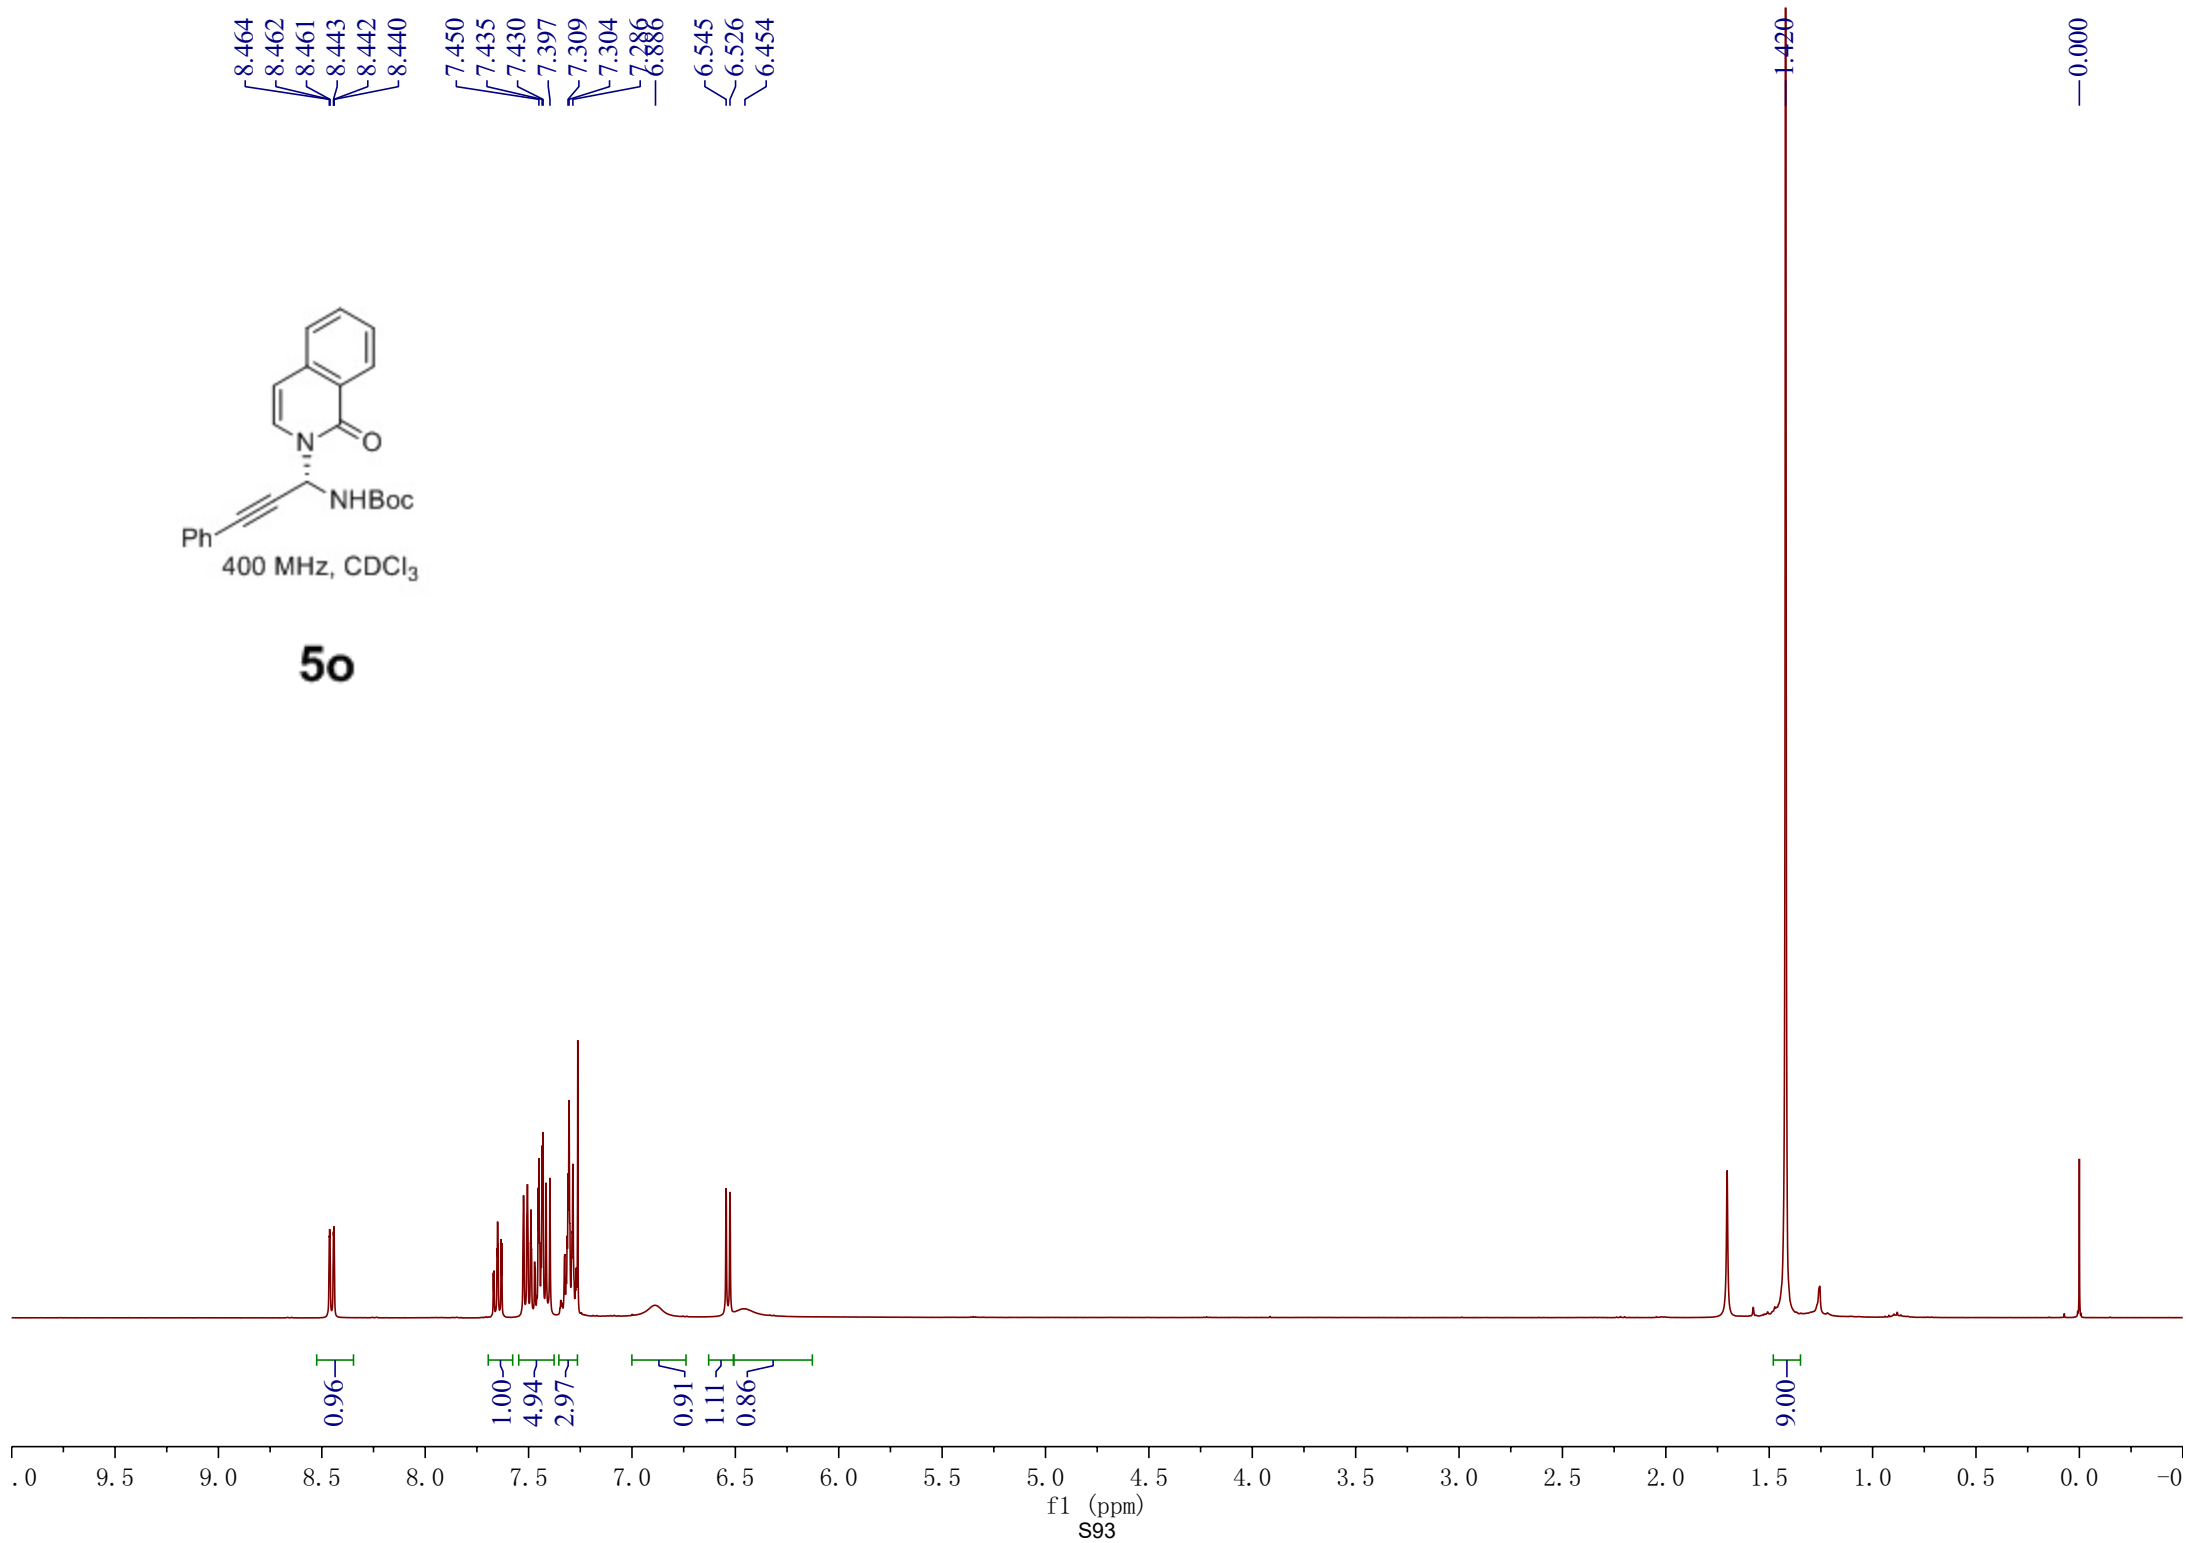

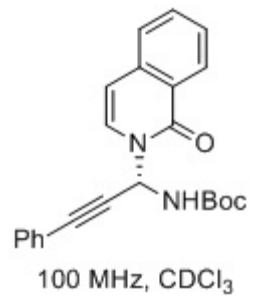

**5o**

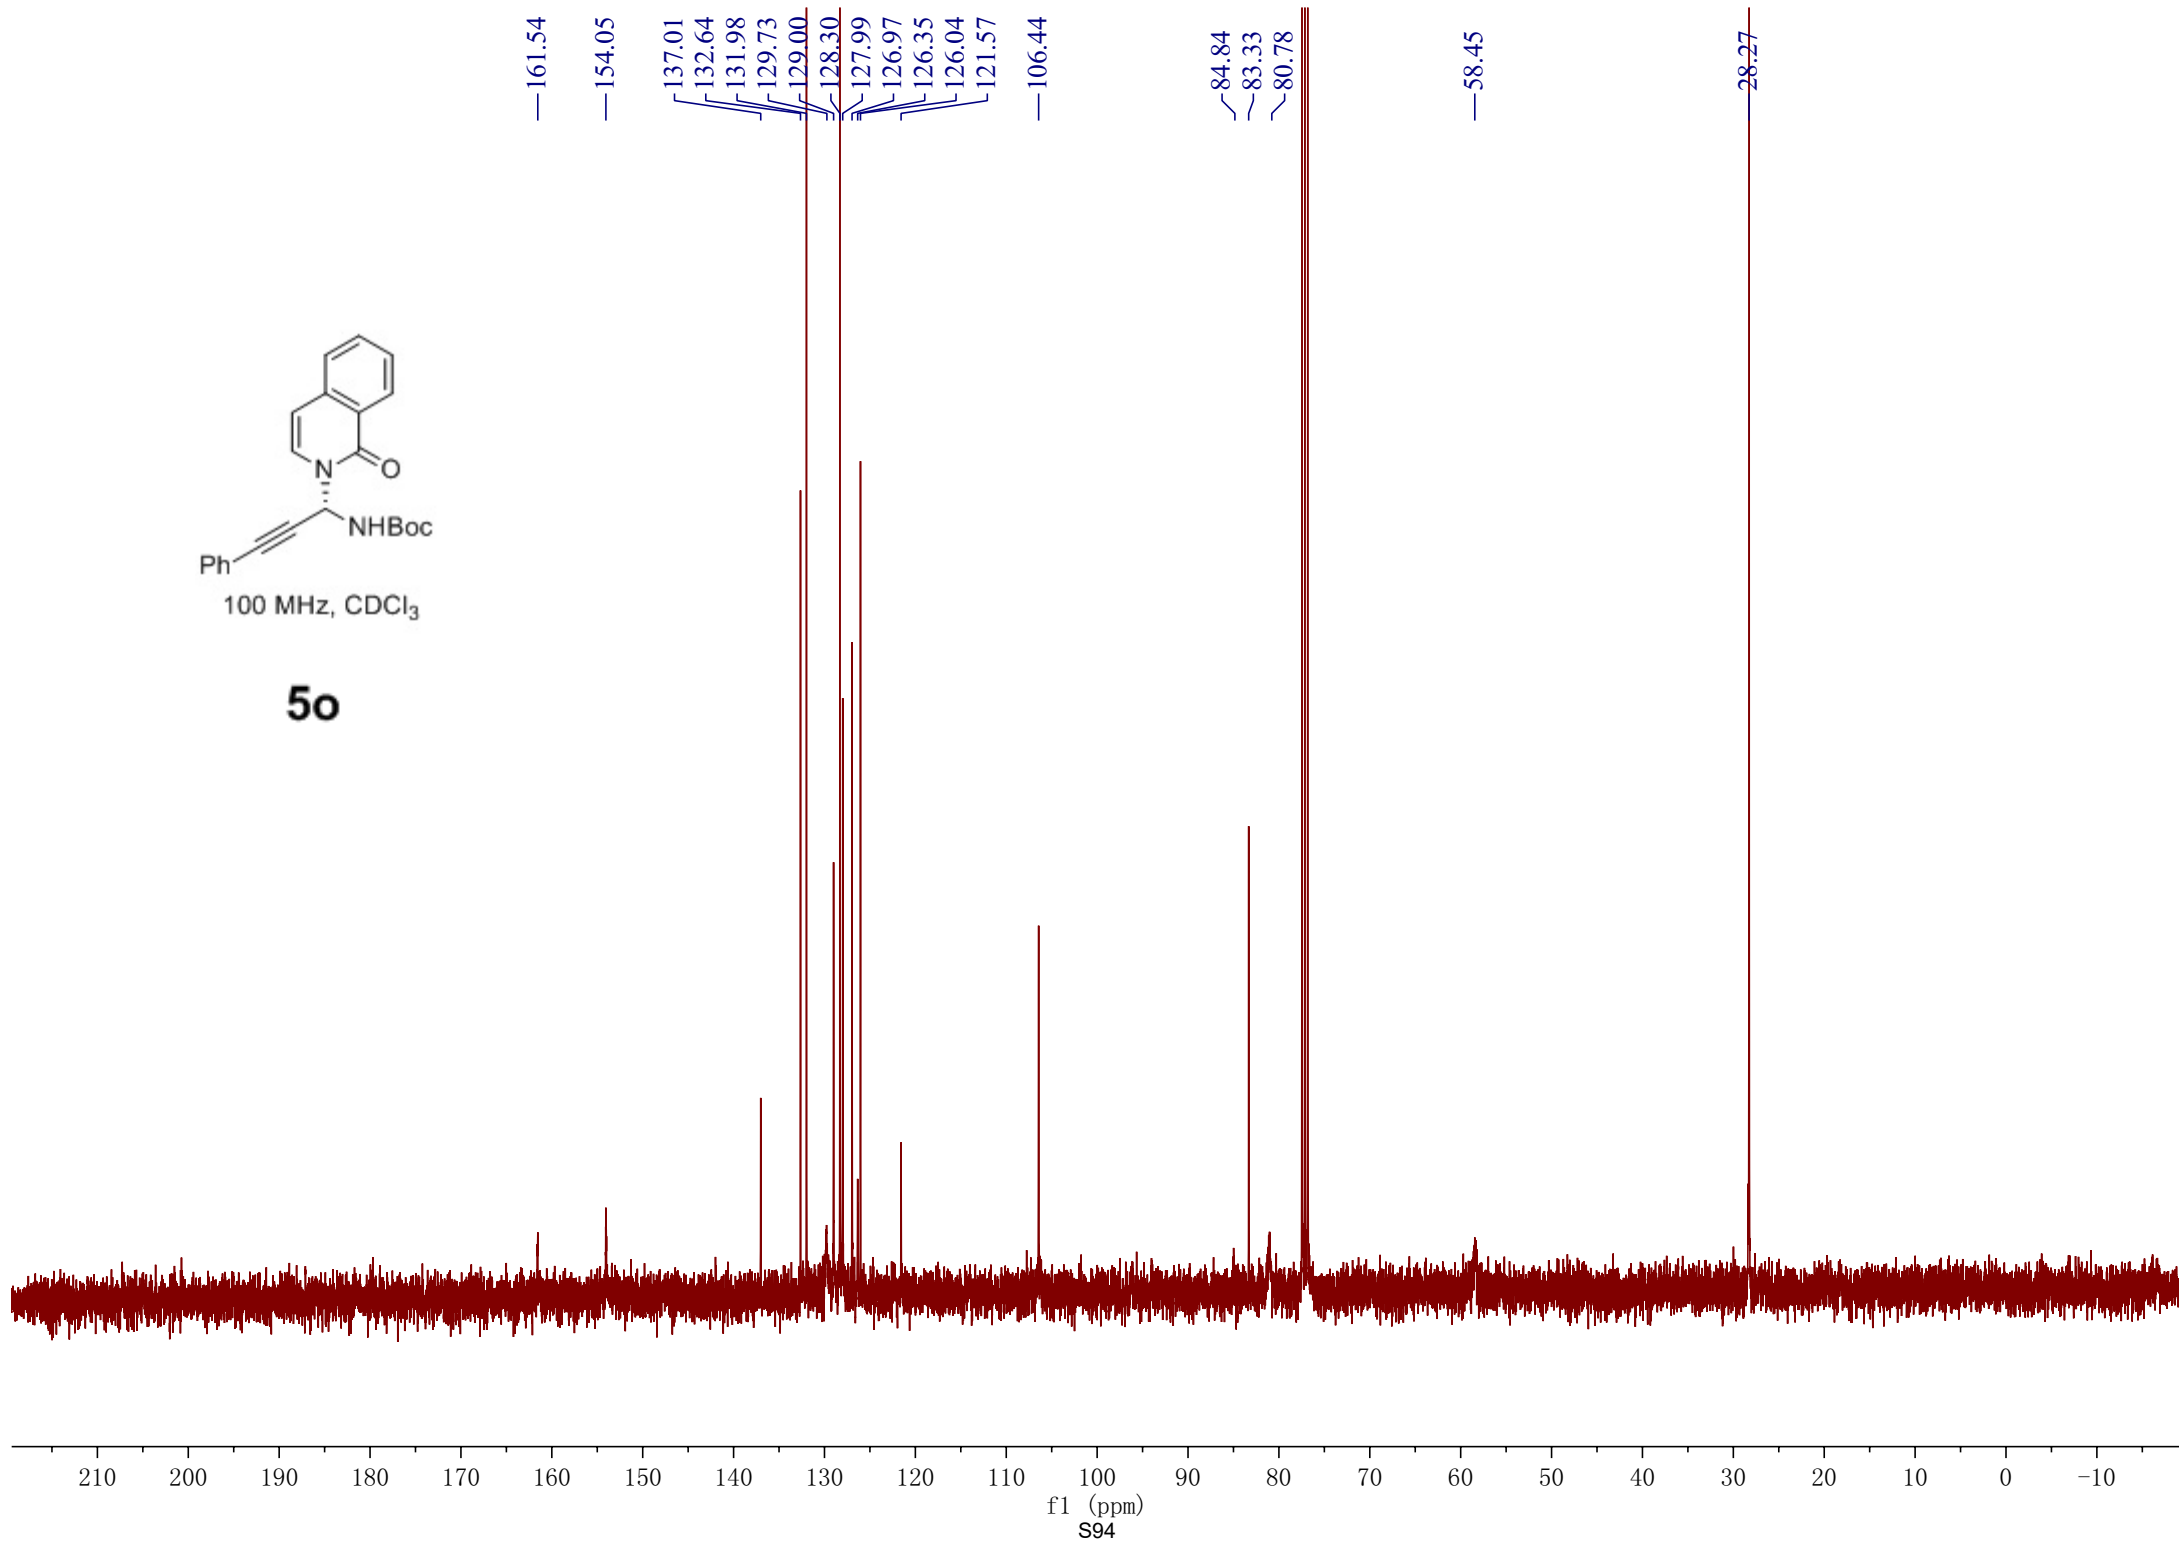



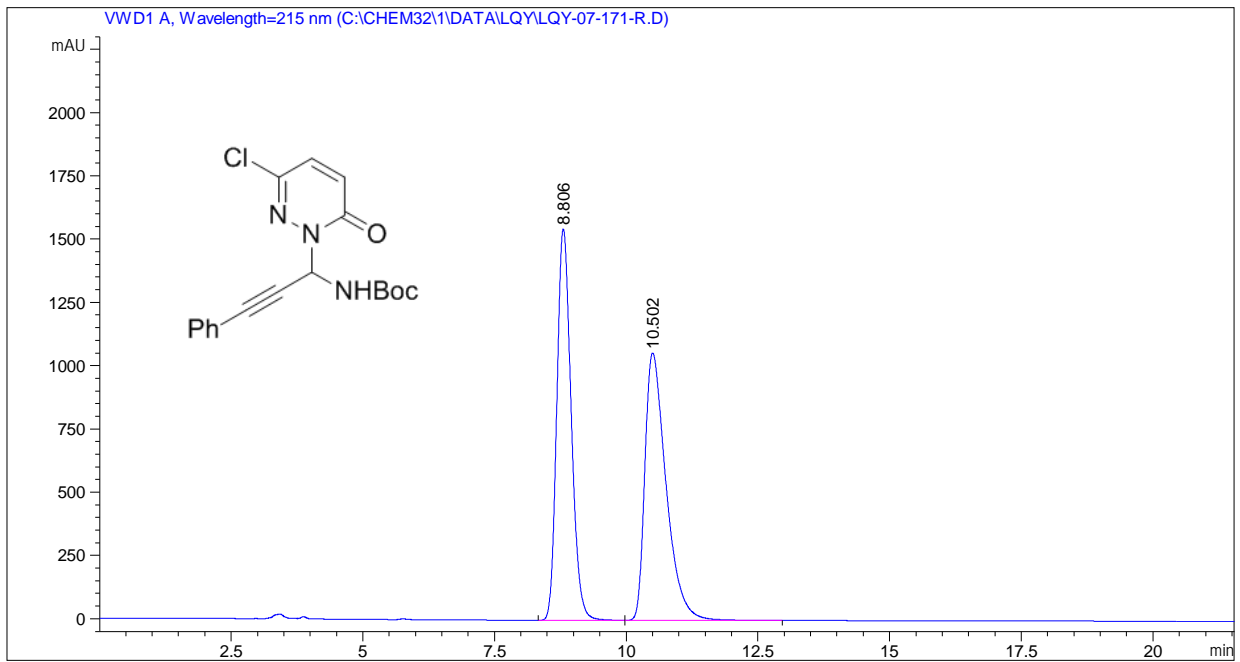

| # | [min]  | [min] | [mAU*s] | [mAU]     | %          |         |
|---|--------|-------|---------|-----------|------------|---------|
| 1 | 8.806  | BB    | 0.2934  | 2.92104e4 | 1545.91370 | 49.7149 |
| 2 | 10.502 | BB    | 0.4243  | 2.95454e4 | 1056.23389 | 50.2851 |

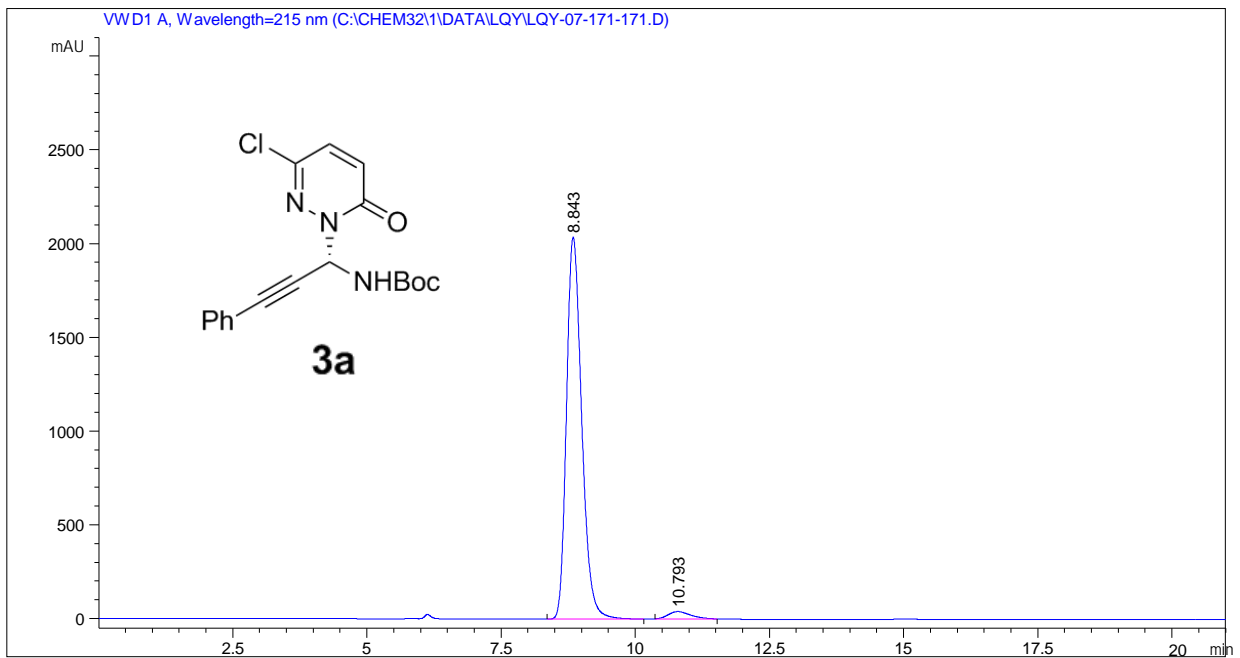

| # | [min]  | [min] | [mAU*s] | [mAU]      | %          |         |
|---|--------|-------|---------|------------|------------|---------|
| 1 | 8.843  | MM    | 0.3287  | 4.01724e4  | 2036.99768 | 97.1887 |
| 2 | 10.793 | MM    | 0.4896  | 1162.04663 | 39.55899   | 2.8113  |

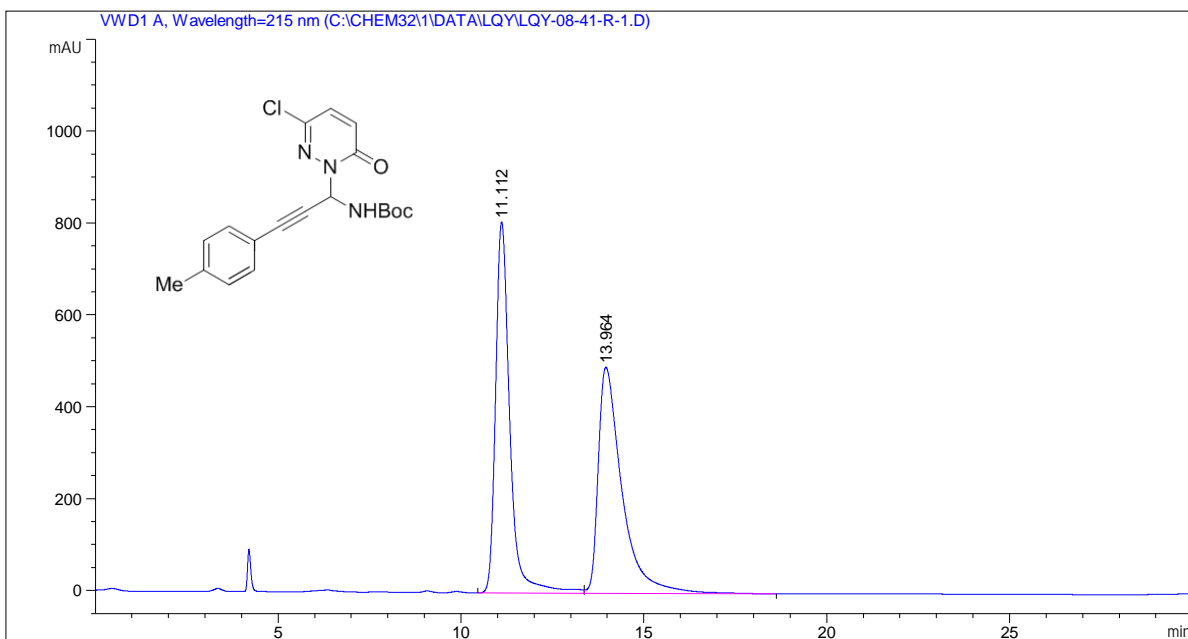

| # | [min]  | [min] | [mAU*s] | [mAU]     | %         |         |
|---|--------|-------|---------|-----------|-----------|---------|
| 1 | 11.112 | BV R  | 0.4083  | 2.18504e4 | 807.78693 | 49.6470 |
| 2 | 13.964 | VB    | 0.6655  | 2.21611e4 | 491.99591 | 50.3530 |

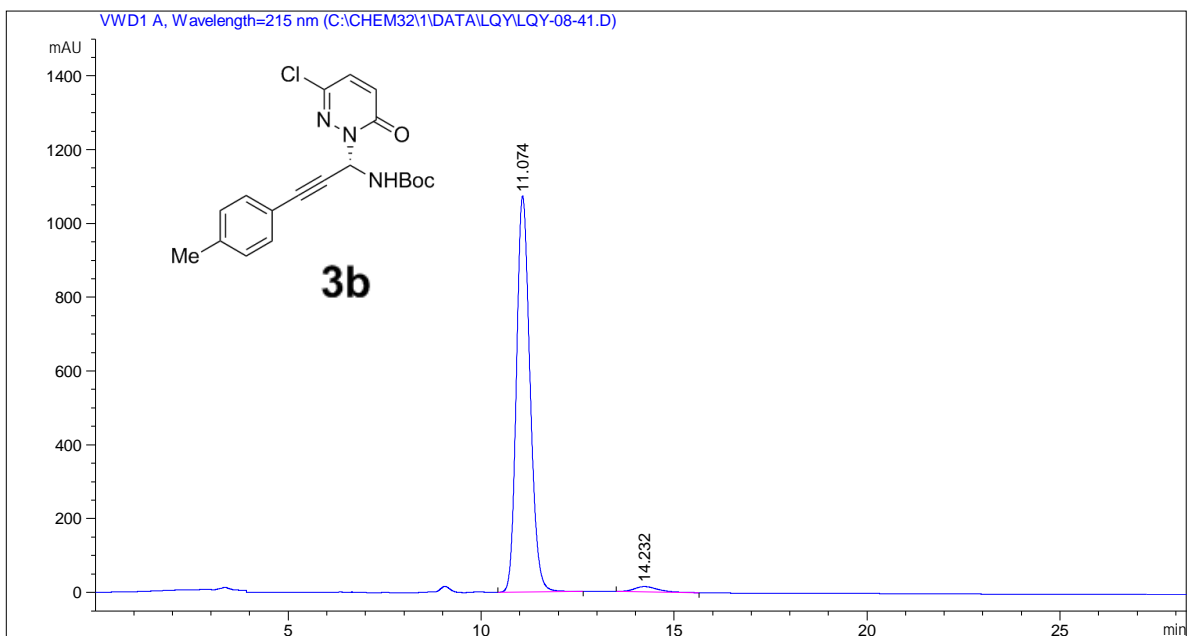

| # | [min]  | [min] | [mAU*s] | [mAU]     | %          |         |
|---|--------|-------|---------|-----------|------------|---------|
| 1 | 11.074 | BB    | 0.3775  | 2.61821e4 | 1073.79468 | 97.7482 |
| 2 | 14.232 | BB    | 0.6489  | 603.15656 | 14.24609   | 2.2518  |

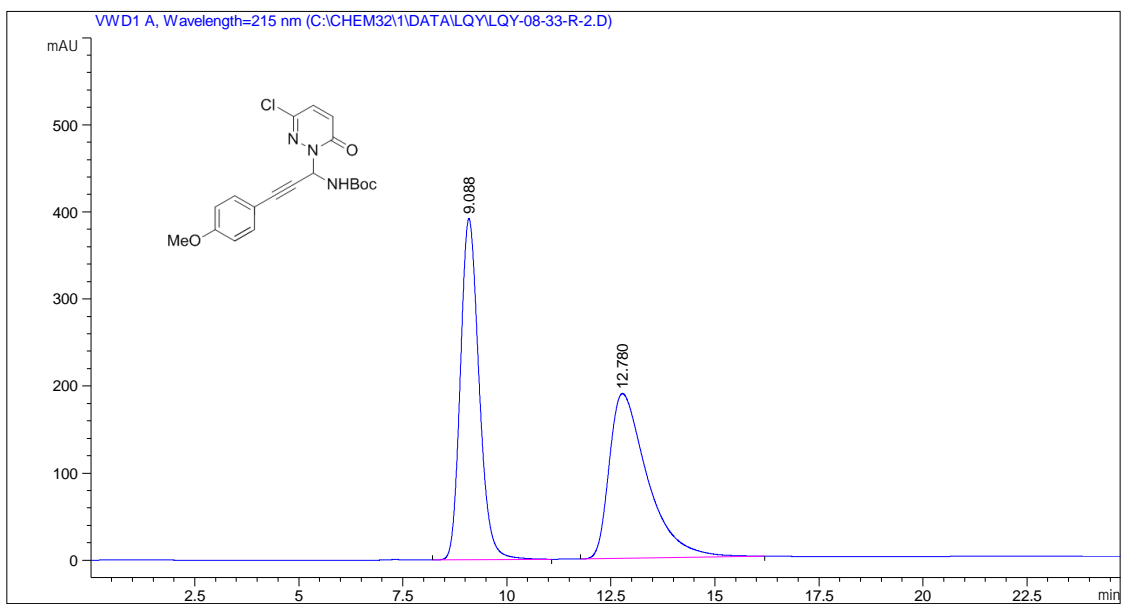

| # | [min]  | [min] | [mAU*s] | [mAU]     | %         |         |
|---|--------|-------|---------|-----------|-----------|---------|
| 1 | 9.088  | BB    | 0.4817  | 1.22173e4 | 391.94629 | 50.2893 |
| 2 | 12.780 | BB    | 0.9601  | 1.20768e4 | 189.36020 | 49.7107 |

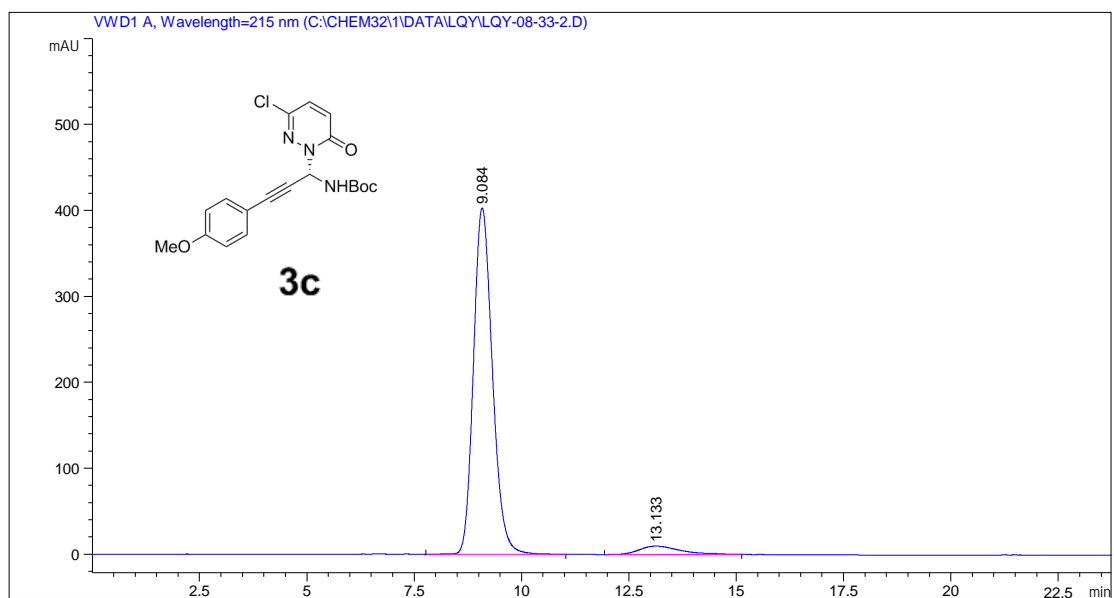

| # | [min]  | [min] | [mAU*s] | [mAU]     | %         |         |
|---|--------|-------|---------|-----------|-----------|---------|
| 1 | 9.084  | BB    | 0.4753  | 1.23838e4 | 403.28482 | 94.9234 |
| 2 | 13.133 | BB    | 0.9599  | 662.29431 | 9.81979   | 5.0766  |

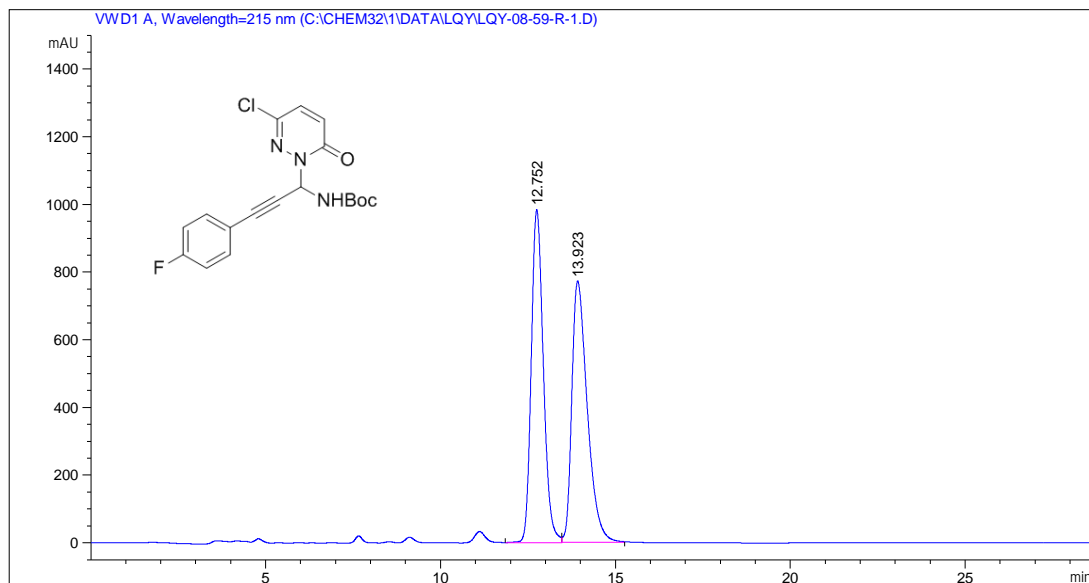

| # | [min]  | [min]  | [mAU*s]   | [mAU]     | %       |
|---|--------|--------|-----------|-----------|---------|
| 1 | 12.752 | 0.3719 | 2.37278e4 | 985.34229 | 49.9988 |
| 2 | 13.923 | 0.5121 | 2.37289e4 | 772.22656 | 50.0012 |

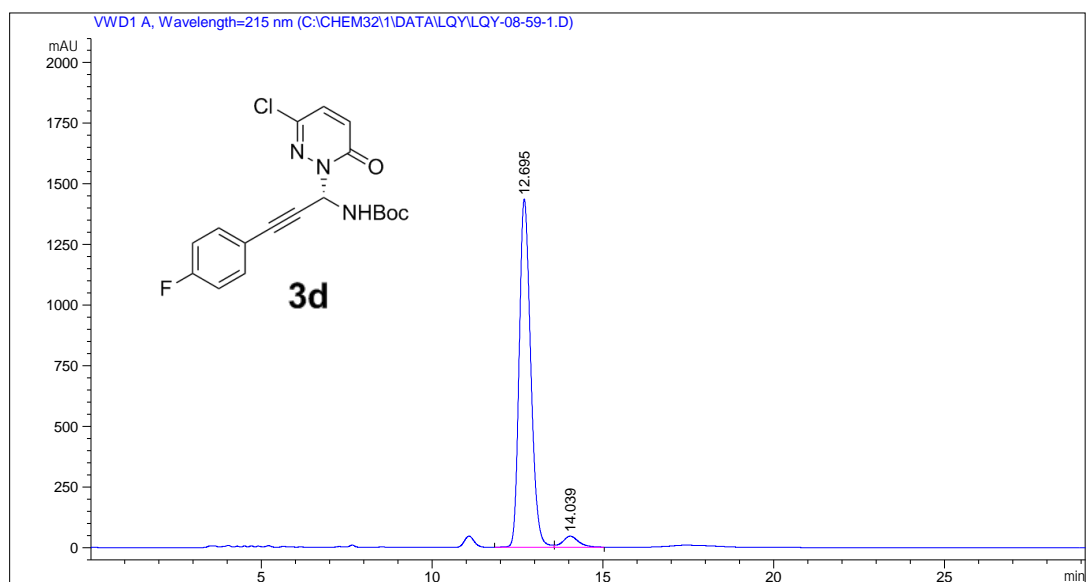

| # | [min]  | [min]  | [mAU*s]    | [mAU]      | %       |
|---|--------|--------|------------|------------|---------|
| 1 | 12.695 | 0.3900 | 3.36248e4  | 1437.00769 | 95.6994 |
| 2 | 14.039 | 0.5489 | 1511.06738 | 45.88544   | 4.3006  |

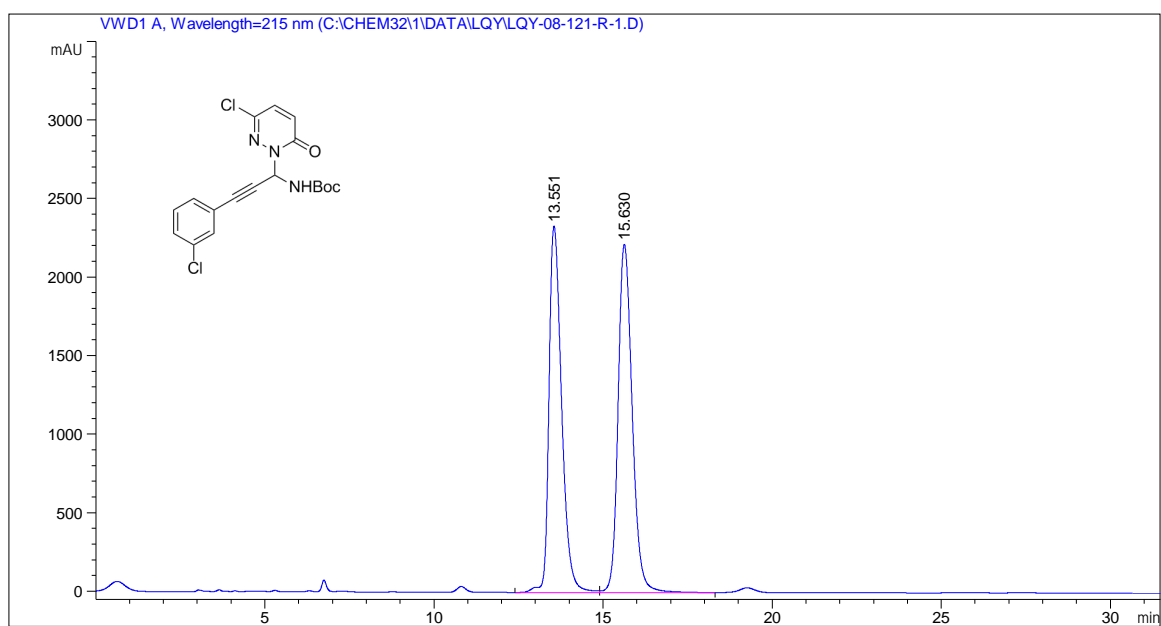

| Peak # | RetTime [min] | Type | Width [min] | Area [mAU*s] | Height [mAU] | Area %  |
|--------|---------------|------|-------------|--------------|--------------|---------|
| 1      | 13.551        | VV R | 0.3982      | 6.05814e4    | 2331.77954   | 48.5467 |
| 2      | 15.630        | VB   | 0.4480      | 6.42085e4    | 2216.45508   | 51.4533 |

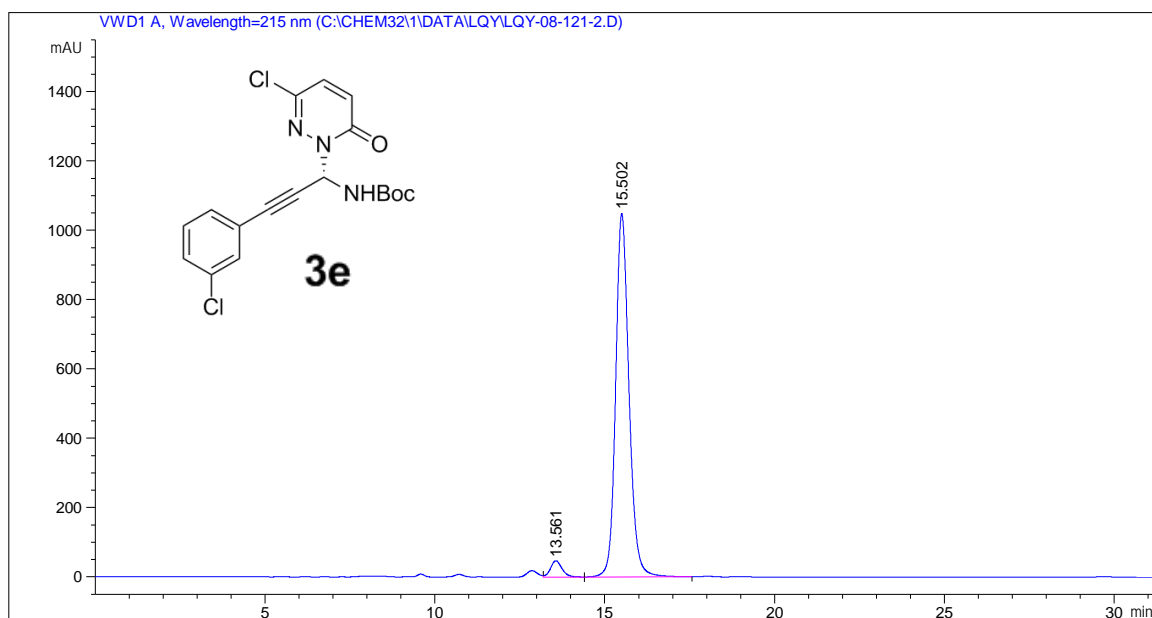

| Peak # | RetTime [min] | Type | Width [min] | Area [mAU*s] | Height [mAU] | Area %  |
|--------|---------------|------|-------------|--------------|--------------|---------|
| 1      | 13.561        | VB   | 0.3563      | 1101.51282   | 47.19630     | 3.7118  |
| 2      | 15.502        | BB   | 0.4159      | 2.85748e4    | 1048.71362   | 96.2882 |

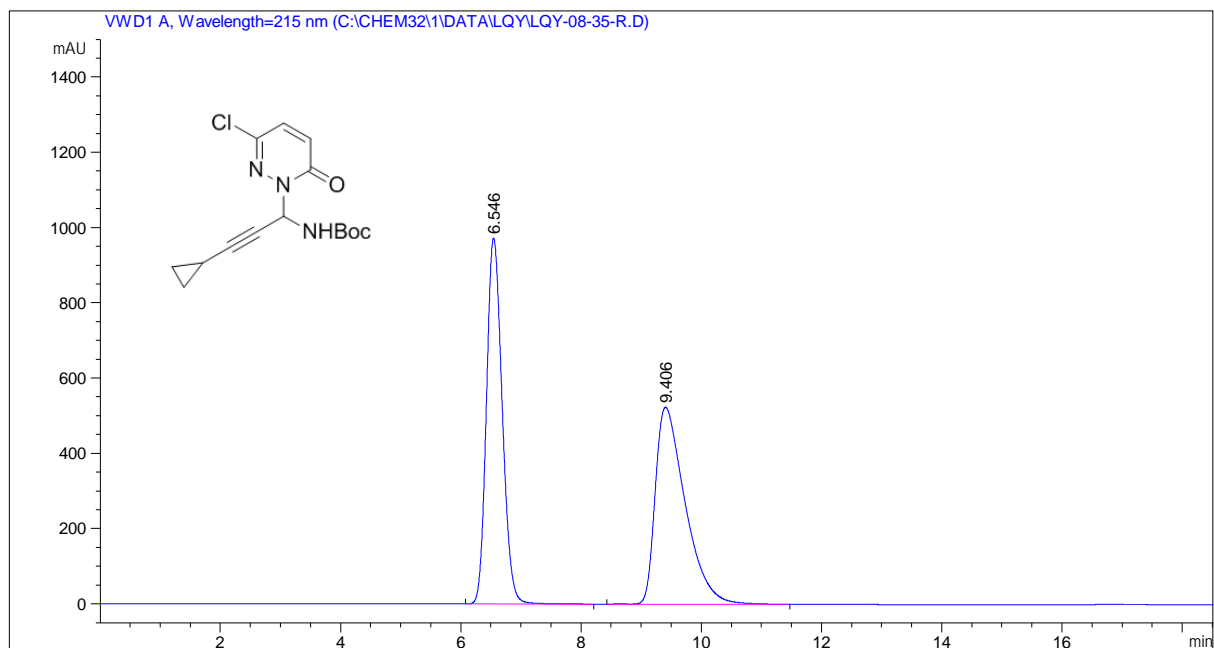

| # | [min] | [min] | [mAU*s] | [mAU]     | %         |         |
|---|-------|-------|---------|-----------|-----------|---------|
| 1 | 6.546 | BB    | 0.2839  | 1.76657e4 | 972.57458 | 49.5176 |
| 2 | 9.406 | VB R  | 0.5205  | 1.80099e4 | 523.37500 | 50.4824 |

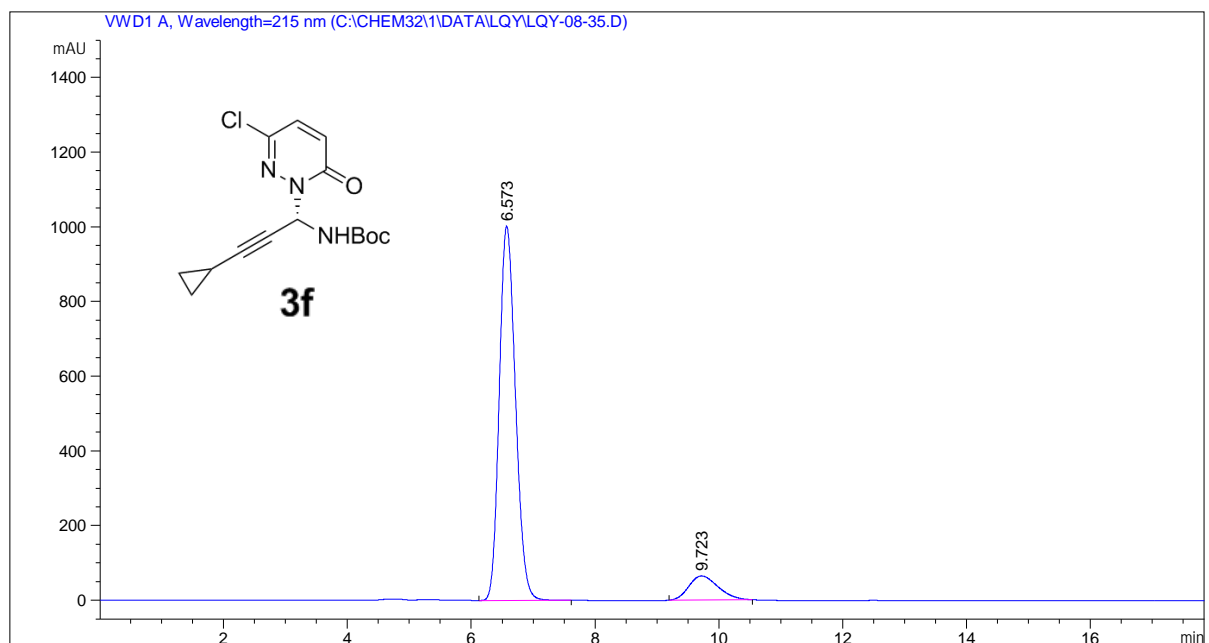

| # | [min] | [min] | [mAU*s] | [mAU]      | %          |         |
|---|-------|-------|---------|------------|------------|---------|
| 1 | 6.573 | BB    | 0.2841  | 1.82249e4  | 1002.47131 | 89.4876 |
| 2 | 9.723 | MM    | 0.5513  | 2140.93506 | 64.72498   | 10.5124 |

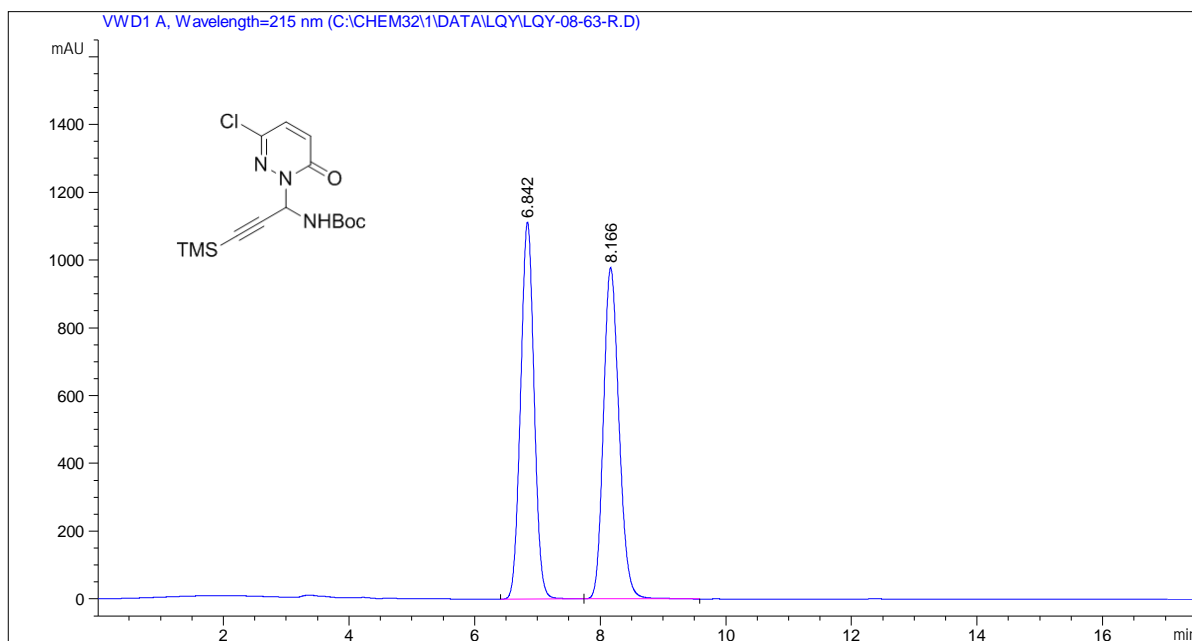

| # | [min] | [min] | [mAU*s] | [mAU]     | %          |         |
|---|-------|-------|---------|-----------|------------|---------|
| 1 | 6.842 | BB    | 0.2322  | 1.66073e4 | 1112.35486 | 49.6510 |
| 2 | 8.166 | BB    | 0.2670  | 1.68408e4 | 977.25244  | 50.3490 |

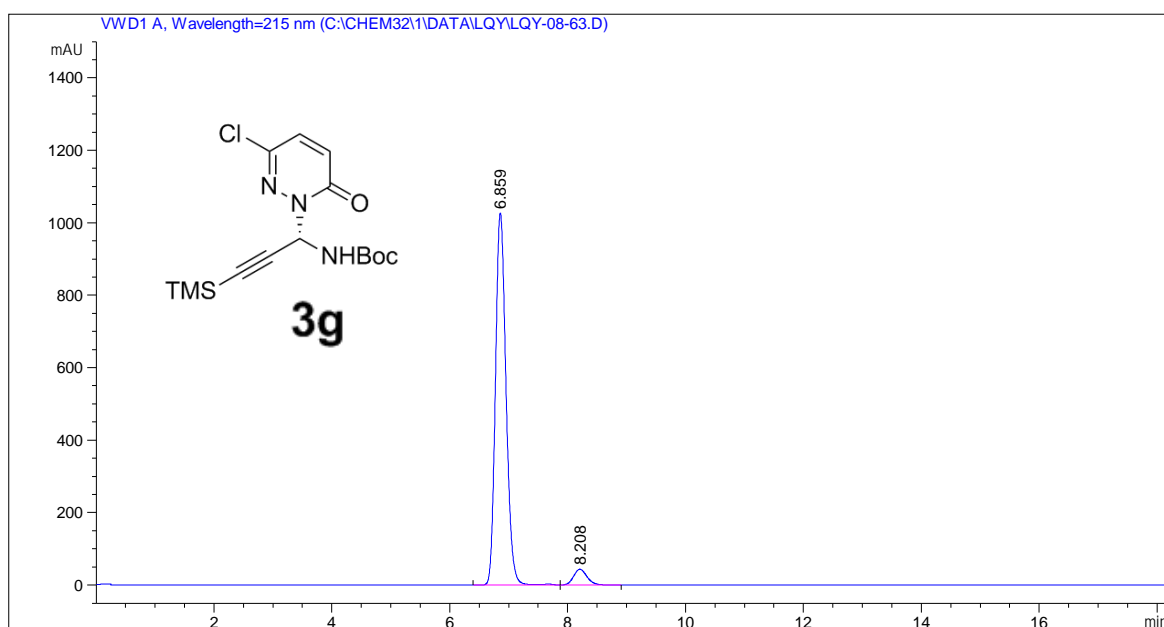

| # | [min] | [min] | [mAU*s] | [mAU]     | %          |         |
|---|-------|-------|---------|-----------|------------|---------|
| 1 | 6.859 | BV R  | 0.1930  | 1.27776e4 | 1026.81482 | 94.8457 |
| 2 | 8.208 | VB    | 0.2457  | 694.38489 | 43.62417   | 5.1543  |

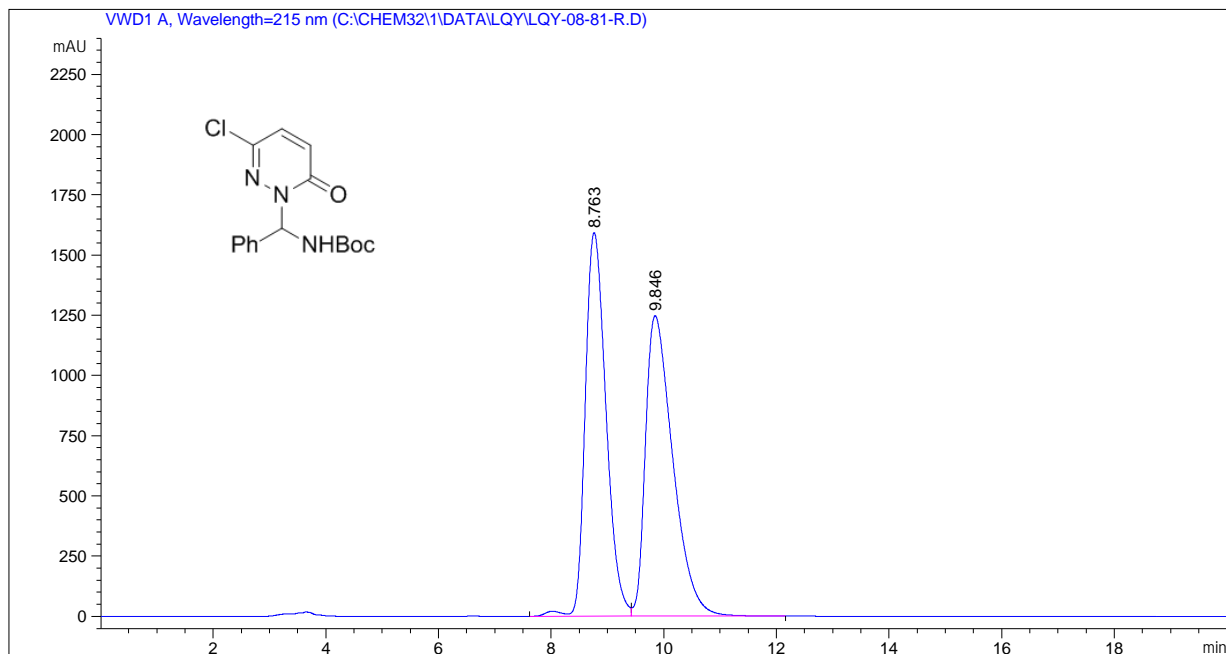

| # | [min] | [min] | [mAU*s] | [mAU]     | %          |         |
|---|-------|-------|---------|-----------|------------|---------|
| 1 | 8.763 | VR    | 0.3982  | 4.08560e4 | 1592.40771 | 49.2159 |
| 2 | 9.846 | VB    | 0.5173  | 4.21579e4 | 1247.26355 | 50.7841 |

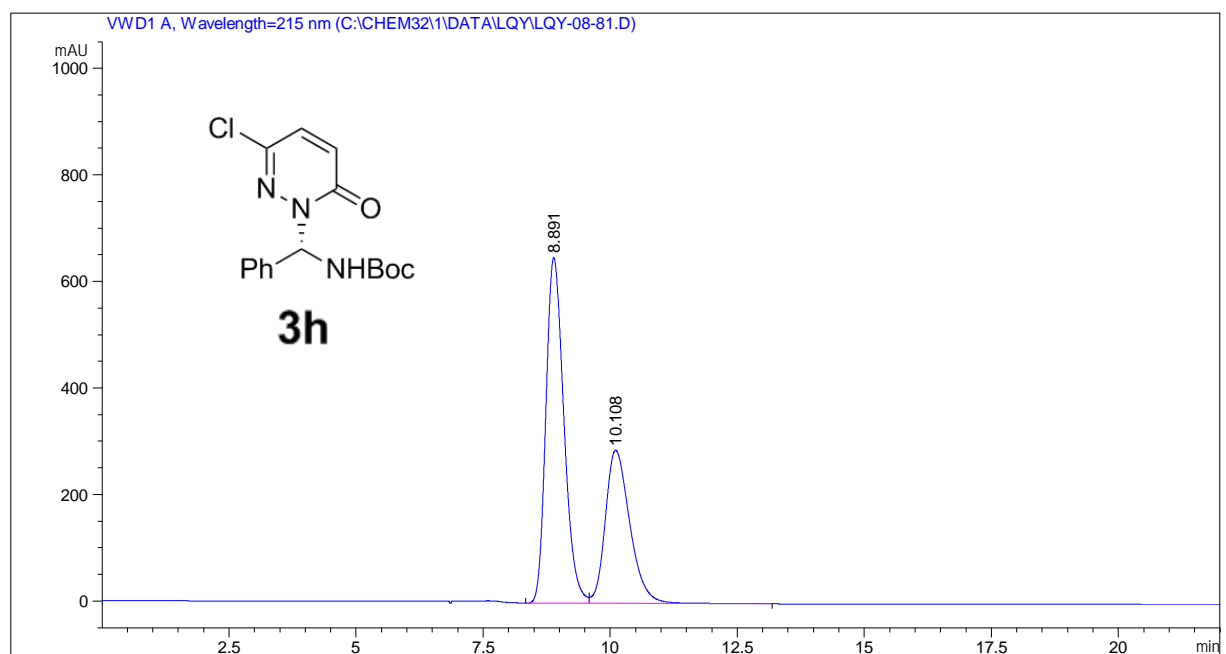

| # | [min]  | [min] | [mAU*s] | [mAU]      | %         |         |
|---|--------|-------|---------|------------|-----------|---------|
| 1 | 8.891  | BV    | 0.3809  | 1.59569e4  | 648.88745 | 62.2837 |
| 2 | 10.108 | VB    | 0.5151  | 9662.78125 | 287.51392 | 37.7163 |



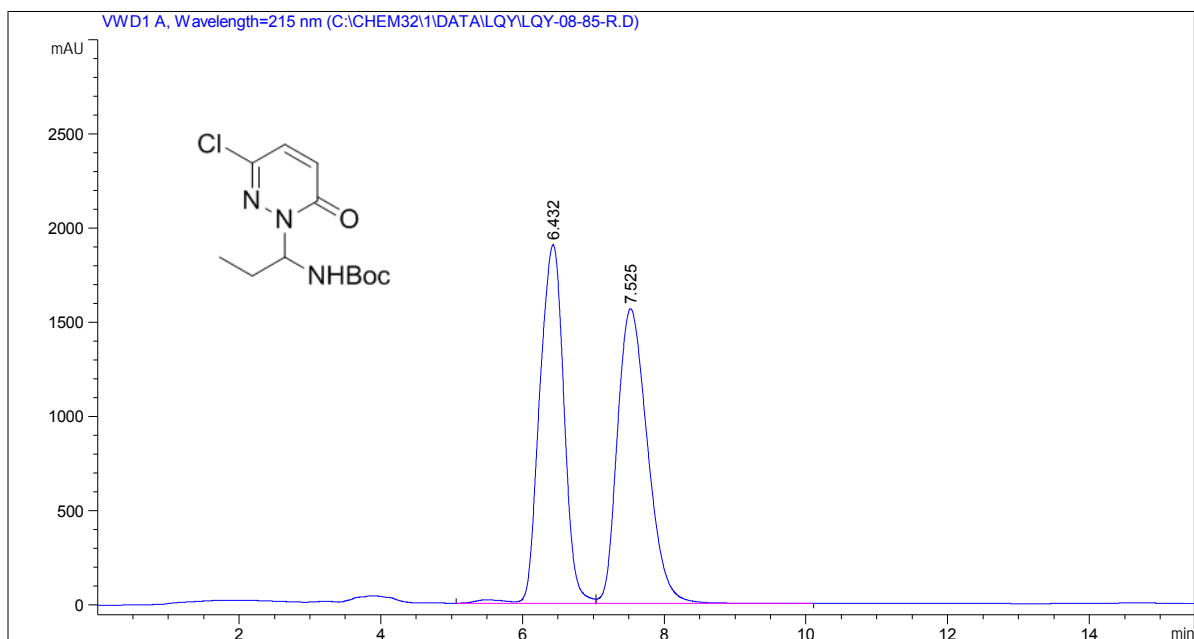

DYU FYhH] aY HndY K] Xh\ . . . 5f YU . . . . <Y] [\h . . . . 5f YU

| # | [mi n] | [mi n] | [mAU*s] | [mAU]     | %          |         |
|---|--------|--------|---------|-----------|------------|---------|
| 1 | 6.432  | VV R   | 0.3888  | 4.53167e4 | 1901.92883 | 49.6298 |
| 2 | 7.525  | VB     | 0.4674  | 4.59928e4 | 1562.36353 | 50.3702 |

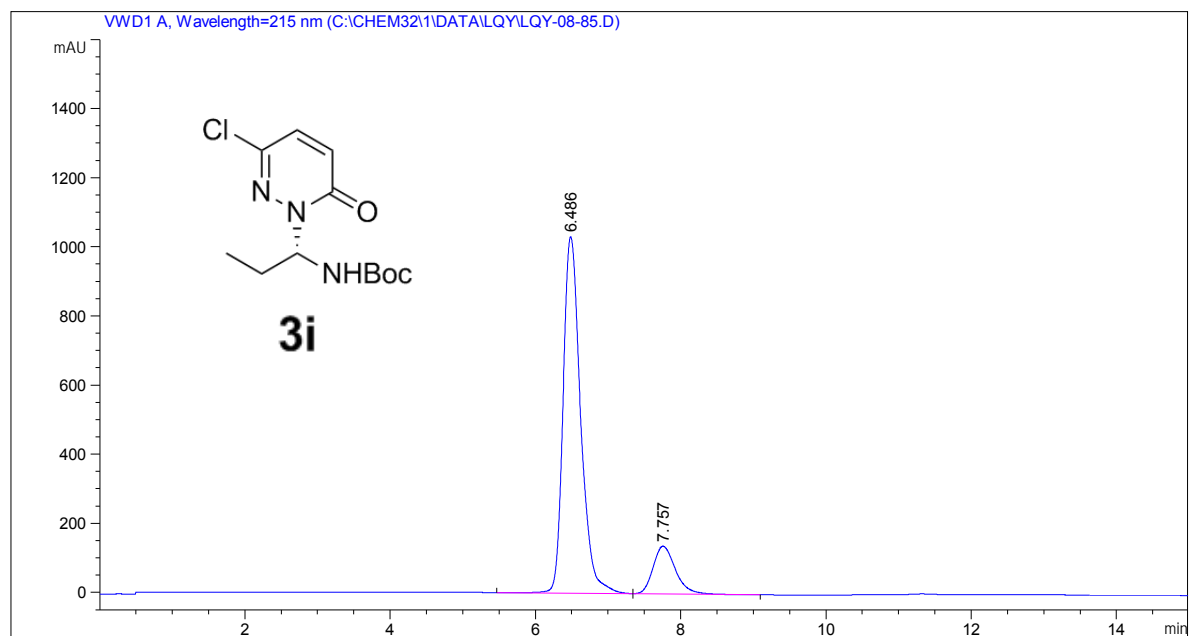

DYU FYhH] aY HndY K] Xh\ . . . 5f YU . . . . <Y] [\h . . . . 5f YU

| # | [mi n] | [mi n] | [mAU*s] | [mAU]      | %          |         |
|---|--------|--------|---------|------------|------------|---------|
| 1 | 6.486  | VV R   | 0.2543  | 1.72738e4  | 1031.92419 | 85.2559 |
| 2 | 7.757  | VB     | 0.3314  | 2987.31543 | 138.64326  | 14.7441 |

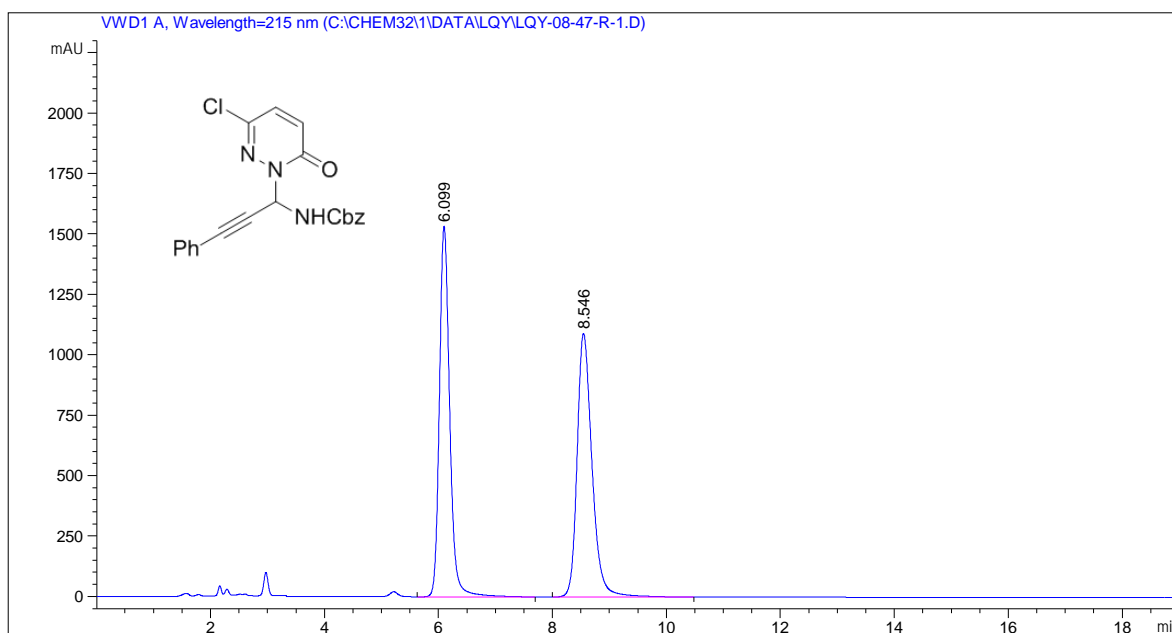

| # | [min] | [min] | [mAU*s] | [mAU]     | %          |         |
|---|-------|-------|---------|-----------|------------|---------|
| 1 | 6.099 | BB    | 0.1927  | 1.92867e4 | 1533.41492 | 49.3974 |
| 2 | 8.546 | BB    | 0.2765  | 1.97573e4 | 1089.68945 | 50.6026 |

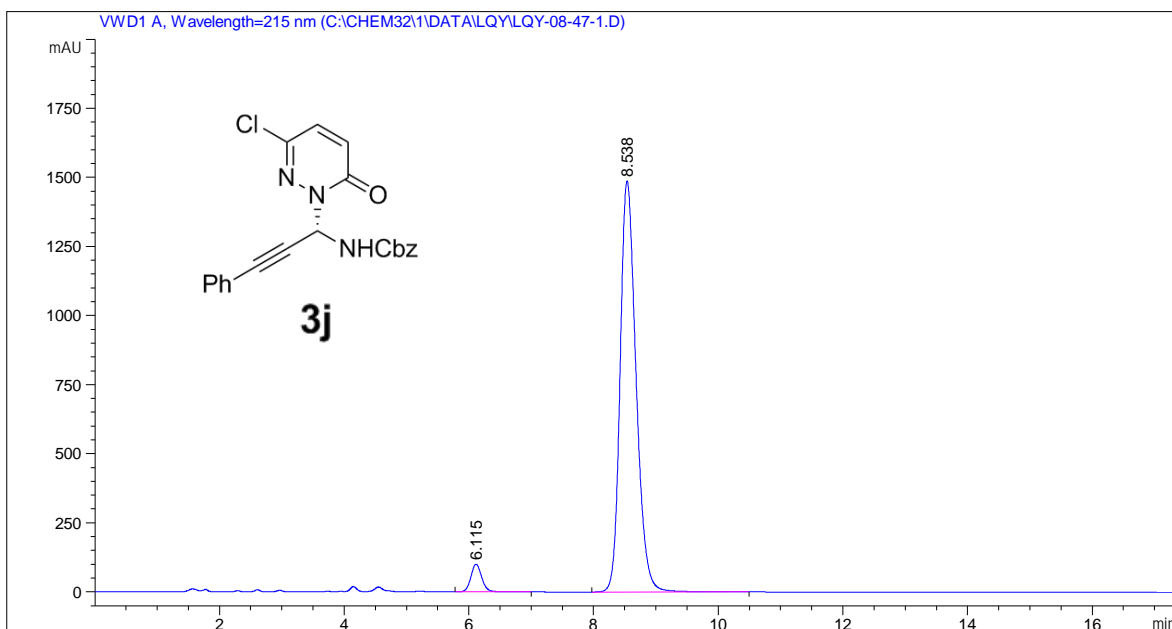

| # | [min] | [min] | [mAU*s] | [mAU]      | %          |         |
|---|-------|-------|---------|------------|------------|---------|
| 1 | 6.115 | BB    | 0.1861  | 1214.56812 | 100.40508  | 4.3998  |
| 2 | 8.538 | BB    | 0.2720  | 2.63904e4  | 1487.71179 | 95.6002 |

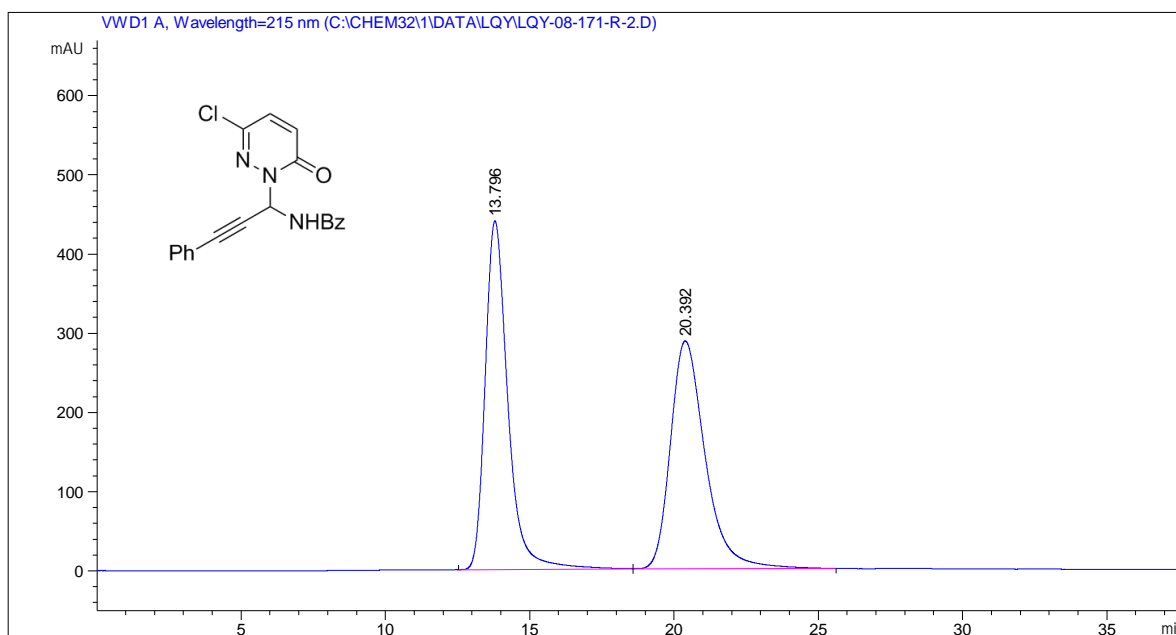

| Peak # | RetTime [min] | Type | Width [min] | Area [mAU*s] | Height [mAU] | Area %  |
|--------|---------------|------|-------------|--------------|--------------|---------|
| 1      | 13.796        | BB   | 0.8311      | 2.40085e4    | 440.35574    | 49.9961 |
| 2      | 20.392        | BB   | 1.2674      | 2.40122e4    | 287.49829    | 50.0039 |

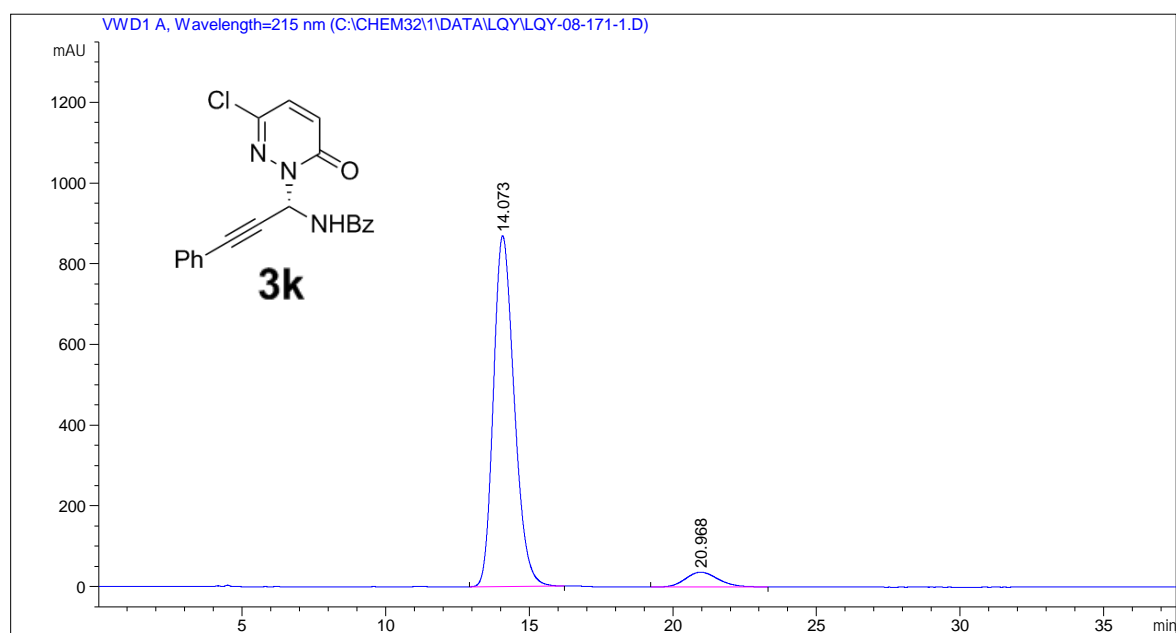

| Peak # | RetTime [min] | Type | Width [min] | Area [mAU*s] | Height [mAU] | Area %  |
|--------|---------------|------|-------------|--------------|--------------|---------|
| 1      | 14.073        | BB   | 0.7816      | 4.37153e4    | 869.48621    | 93.7963 |
| 2      | 20.968        | BB   | 1.1839      | 2891.34961   | 36.74792     | 6.2037  |

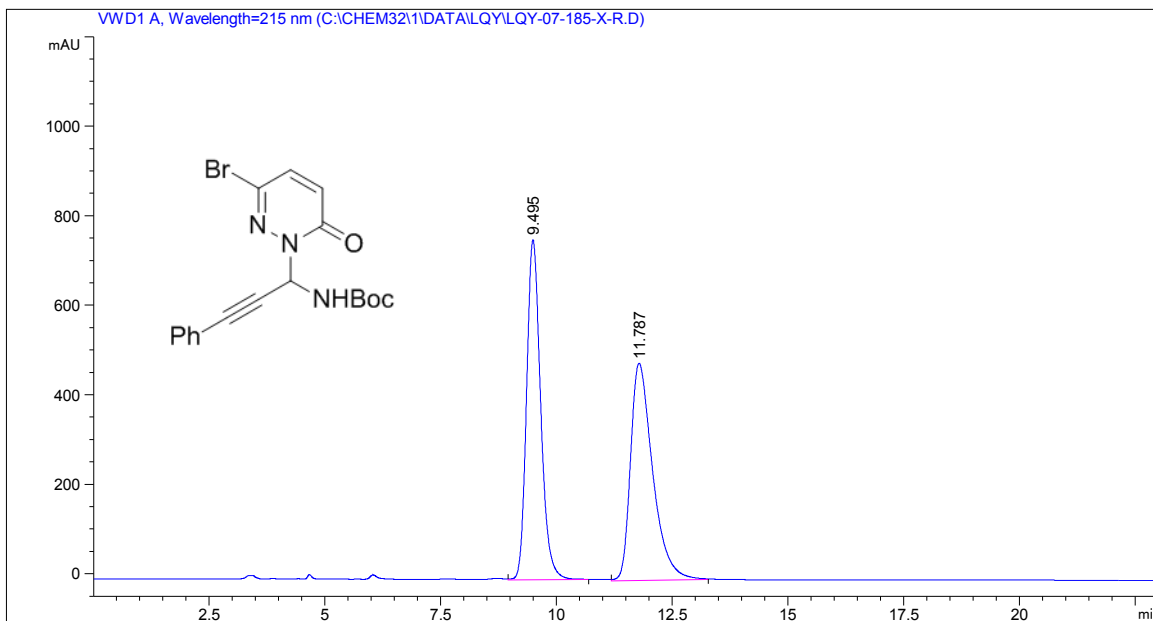

| Peak # | RetTime [min] | Type | Width [min] | Area [mAU*s] | Height [mAU] | Area %  |
|--------|---------------|------|-------------|--------------|--------------|---------|
| 1      | 9.495         | MM   | 0.3519      | 1.60500e4    | 760.16357    | 49.8748 |
| 2      | 11.787        | MM   | 0.5537      | 1.61305e4    | 485.56241    | 50.1252 |

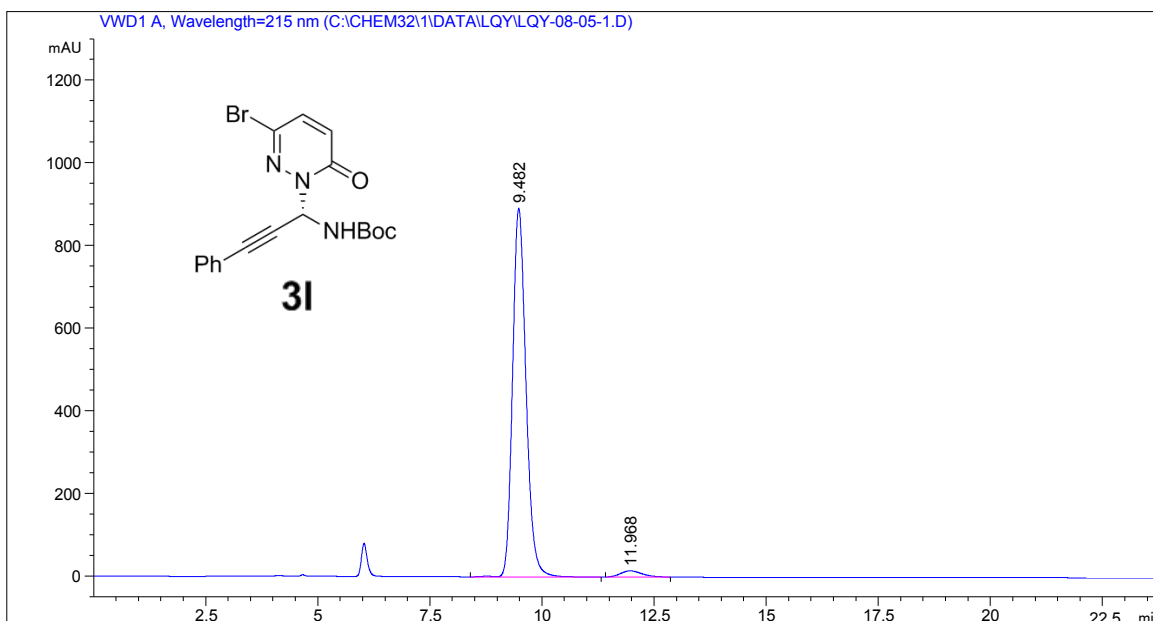

| Peak # | RetTime [min] | Type | Width [min] | Area [mAU*s] | Height [mAU] | Area %  |
|--------|---------------|------|-------------|--------------|--------------|---------|
| 1      | 9.482         | VB R | 0.3206      | 1.85629e4    | 892.58099    | 97.1696 |
| 2      | 11.968        | MM   | 0.5823      | 540.70605    | 15.47744     | 2.8304  |



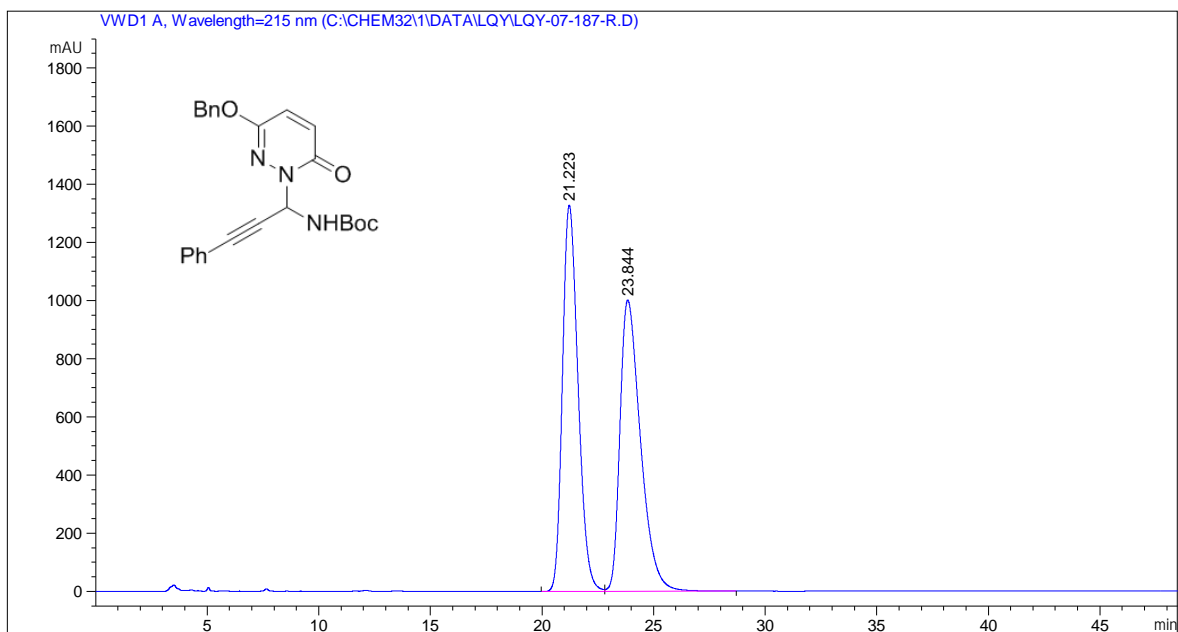

| Peak # | RetTime [min] | Type | Width [min] | Area [mAU*s] | Height [mAU] | Area %  |
|--------|---------------|------|-------------|--------------|--------------|---------|
| 1      | 21.223        | BV   | 0.7520      | 6.44654e4    | 1328.69922   | 50.1330 |
| 2      | 23.844        | VB   | 0.9757      | 6.41235e4    | 1001.86029   | 49.8670 |

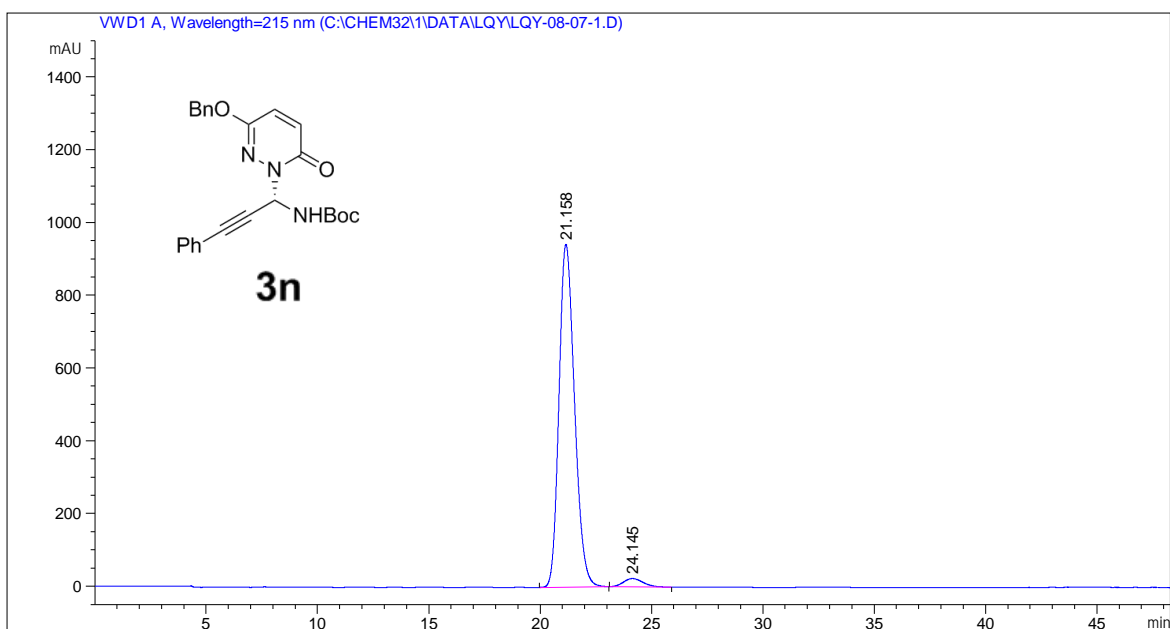

| Peak # | RetTime [min] | Type | Width [min] | Area [mAU*s] | Height [mAU] | Area %  |
|--------|---------------|------|-------------|--------------|--------------|---------|
| 1      | 21.158        | BB   | 0.7504      | 4.56736e4    | 942.41882    | 97.0787 |
| 2      | 24.145        | BB   | 0.9230      | 1374.42297   | 22.71358     | 2.9213  |

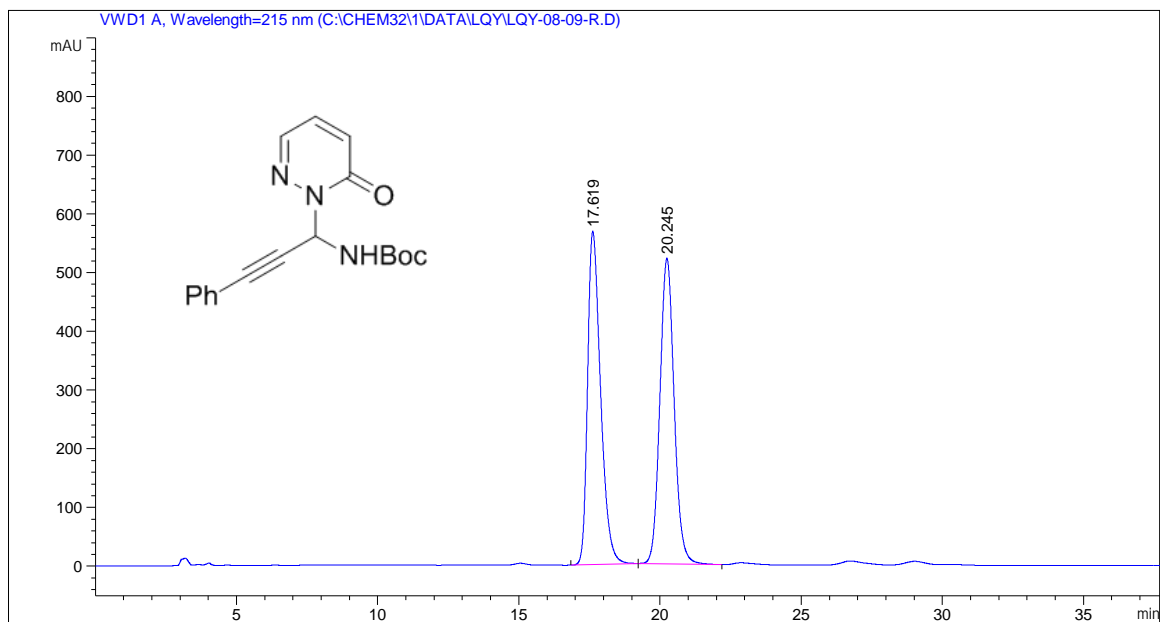

| Peak # | RetTime [min] | Type | Width [min] | Area [mAU*s] | Height [mAU] | Area %  |
|--------|---------------|------|-------------|--------------|--------------|---------|
| 1      | 17.619        | BB   | 0.4874      | 1.81186e4    | 567.64630    | 49.8163 |
| 2      | 20.245        | BB   | 0.5433      | 1.82523e4    | 520.20465    | 50.1837 |

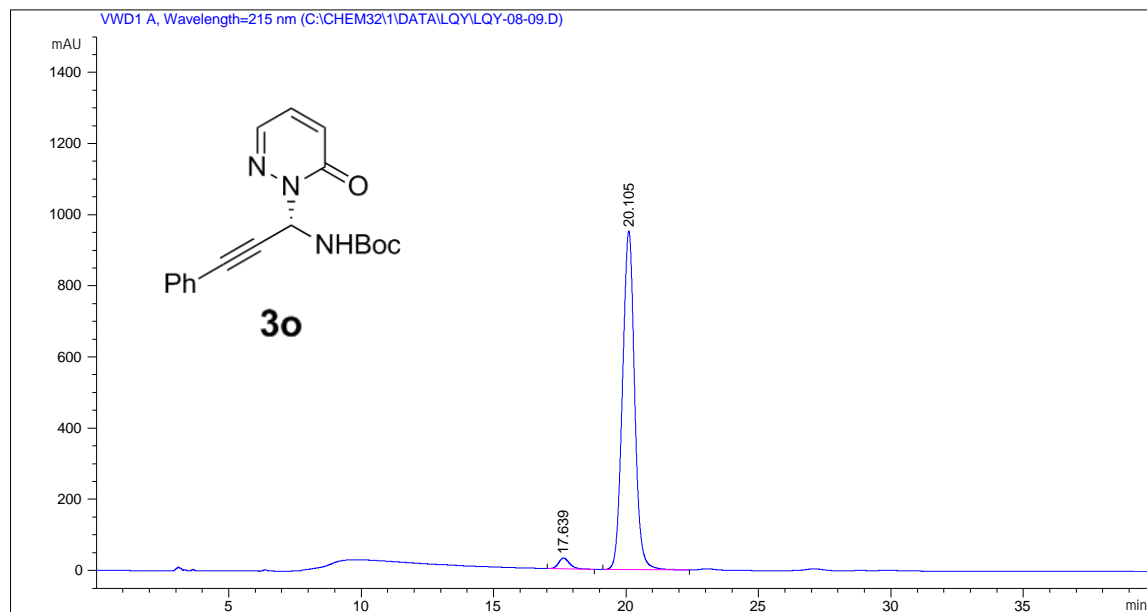

| Peak # | RetTime [min] | Type | Width [min] | Area [mAU*s] | Height [mAU] | Area %  |
|--------|---------------|------|-------------|--------------|--------------|---------|
| 1      | 17.639        | BB   | 0.4345      | 861.66656    | 30.23155     | 2.7676  |
| 2      | 20.105        | BB   | 0.4942      | 3.02721e4    | 951.46997    | 97.2324 |

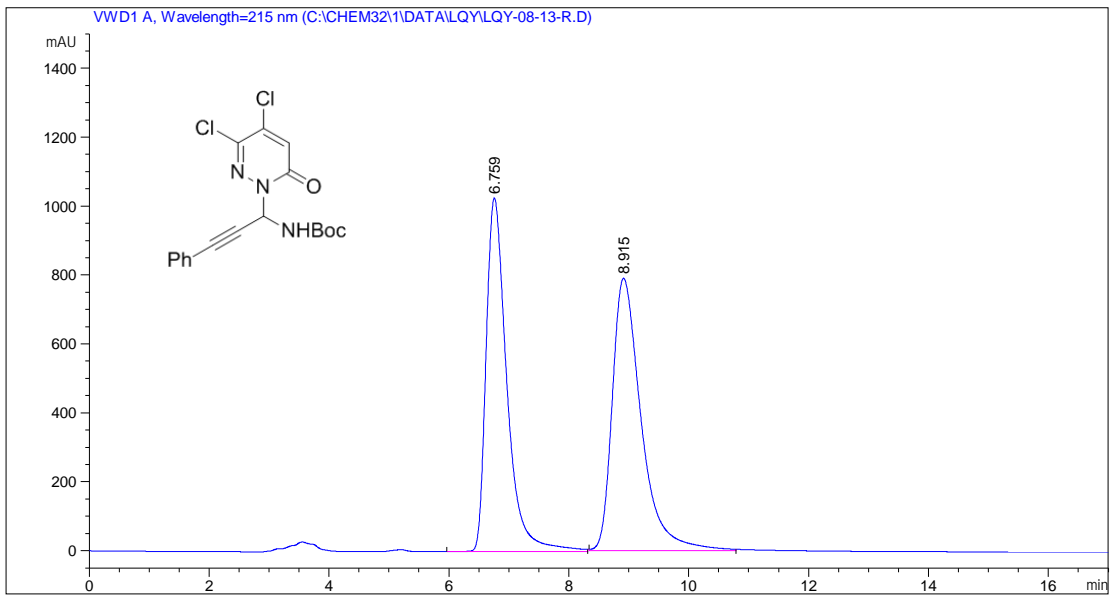

| Peak # | RetTime [min] | Type | Width [min] | Area [mAU*s] | Height [mAU] | Area %  |
|--------|---------------|------|-------------|--------------|--------------|---------|
| 1      | 6.759         | BV   | 0.3671      | 2.46307e4    | 1025.82715   | 48.2583 |
| 2      | 8.915         | MM   | 0.5570      | 2.64085e4    | 790.22650    | 51.7417 |

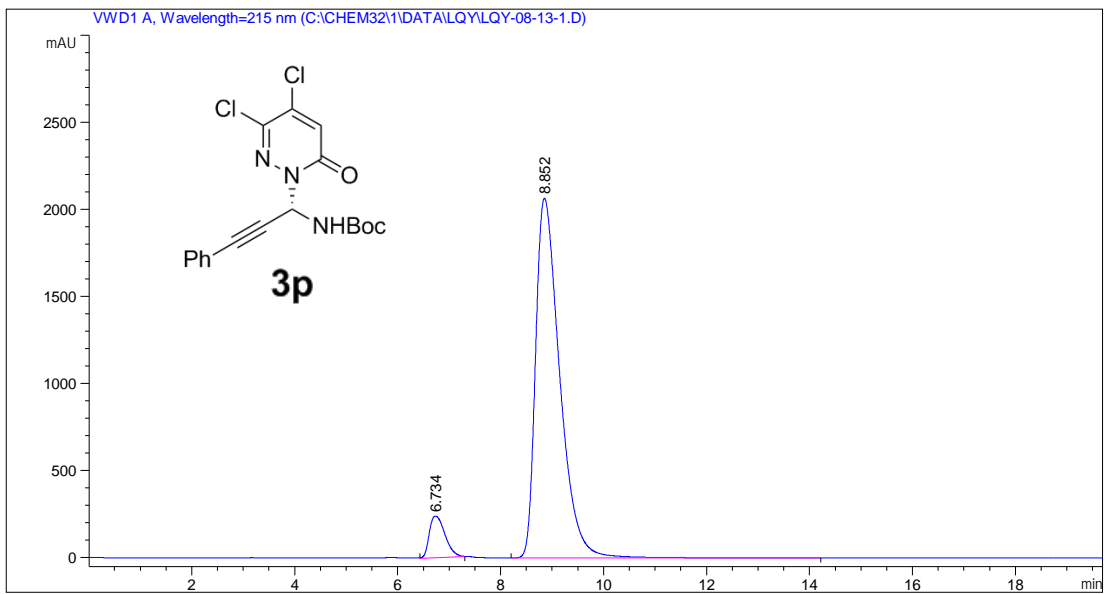

| Peak # | RetTime [min] | Type | Width [min] | Area [mAU*s] | Height [mAU] | Area %  |
|--------|---------------|------|-------------|--------------|--------------|---------|
| 1      | 6.734         | MM   | 0.3537      | 5093.09863   | 239.99750    | 7.0609  |
| 2      | 8.852         | BB   | 0.4958      | 6.70378e4    | 2064.76172   | 92.9391 |



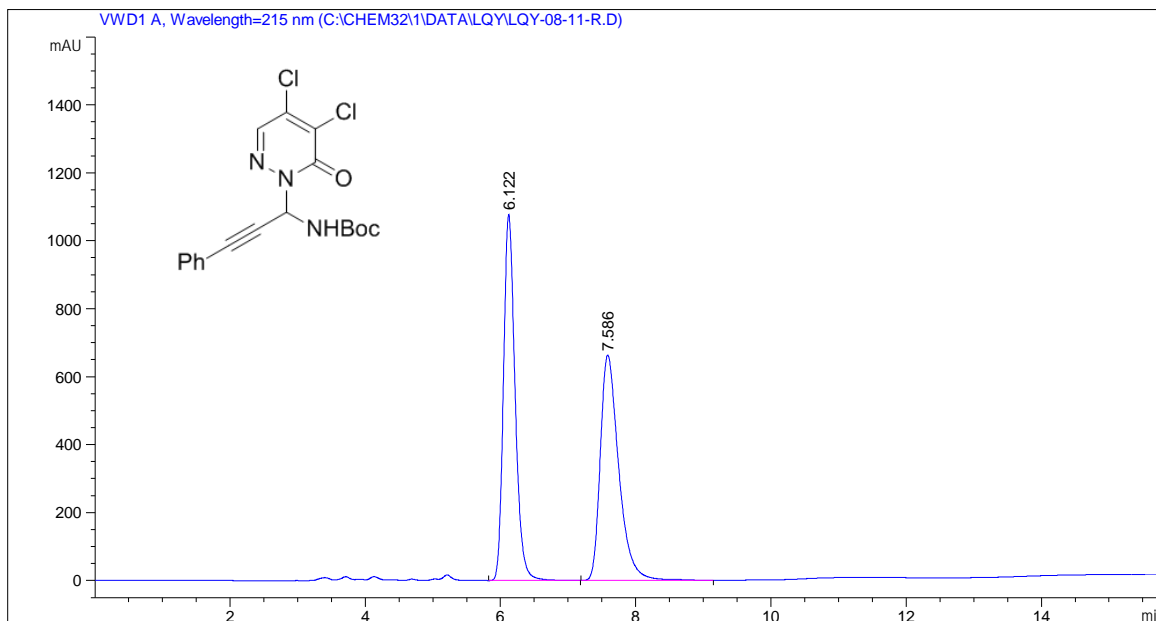

| Peak # | RetTime [min] | Type | Width [min] | Area [mAU*s] | Height [mAU] | Area %  |
|--------|---------------|------|-------------|--------------|--------------|---------|
| 1      | 6.122         | BB   | 0.1823      | 1.28656e4    | 1077.32642   | 50.5592 |
| 2      | 7.586         | BV R | 0.2883      | 1.25810e4    | 663.24408    | 49.4408 |

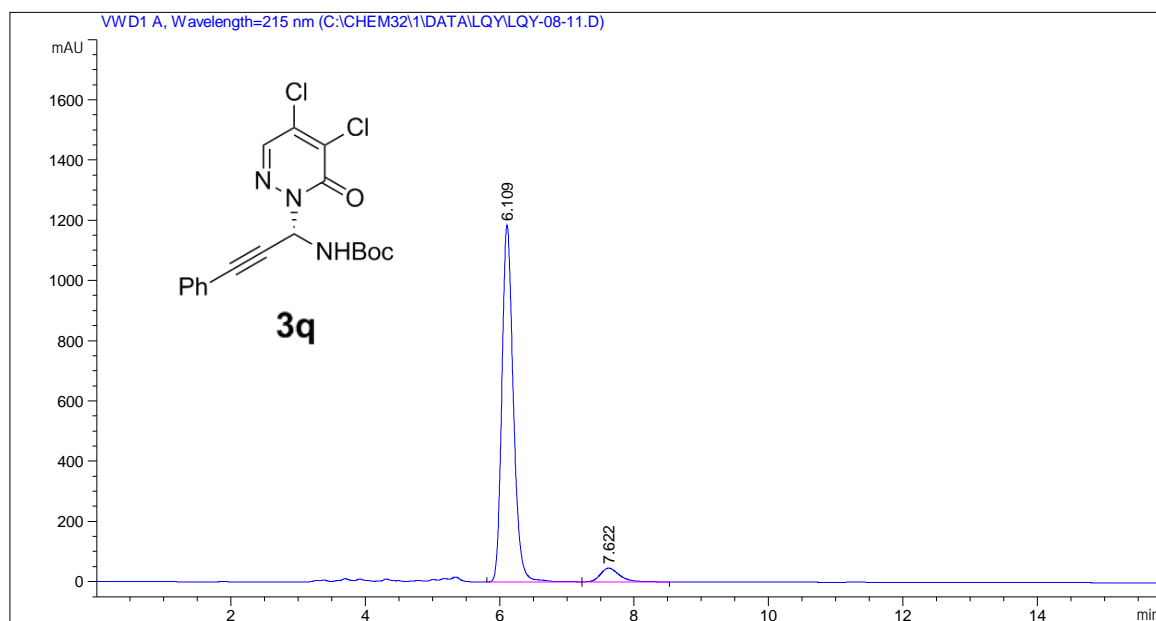

| Peak # | RetTime [min] | Type | Width [min] | Area [mAU*s] | Height [mAU] | Area %  |
|--------|---------------|------|-------------|--------------|--------------|---------|
| 1      | 6.109         | BV   | 0.1820      | 1.40047e4    | 1184.01758   | 93.9780 |
| 2      | 7.622         | VB   | 0.3002      | 897.40613    | 45.47625     | 6.0220  |

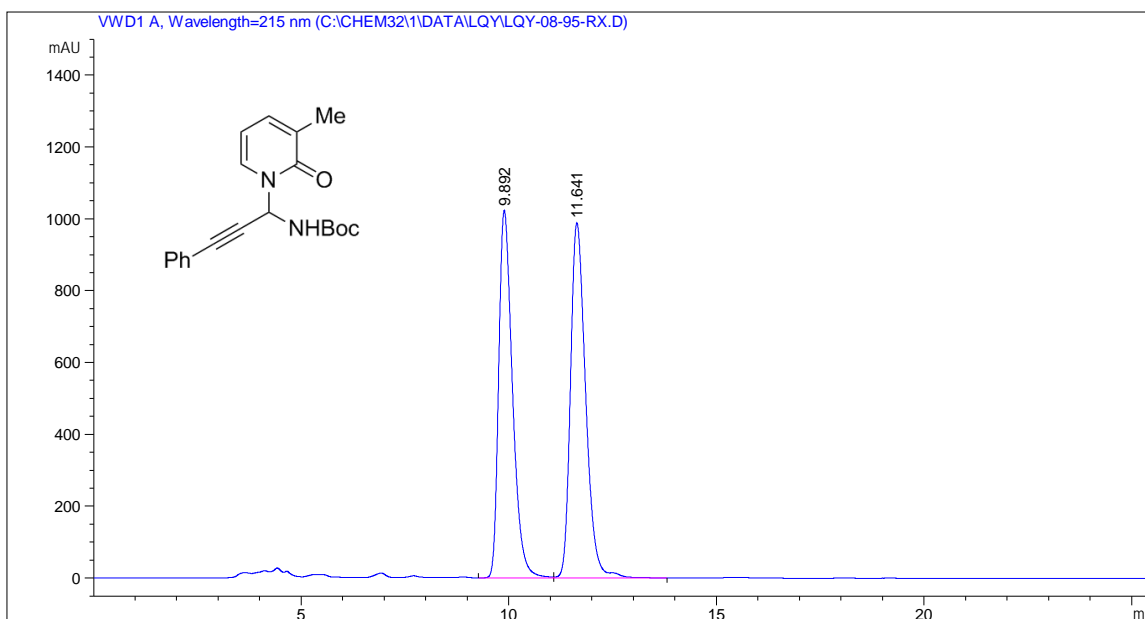

| # | [min]  | [min] | [mAU*s] | [mAU]     | %          |         |
|---|--------|-------|---------|-----------|------------|---------|
| 1 | 9.892  | BV    | 0.3536  | 2.35565e4 | 1023.03162 | 48.3775 |
| 2 | 11.641 | VV R  | 0.3889  | 2.51366e4 | 988.15271  | 51.6225 |

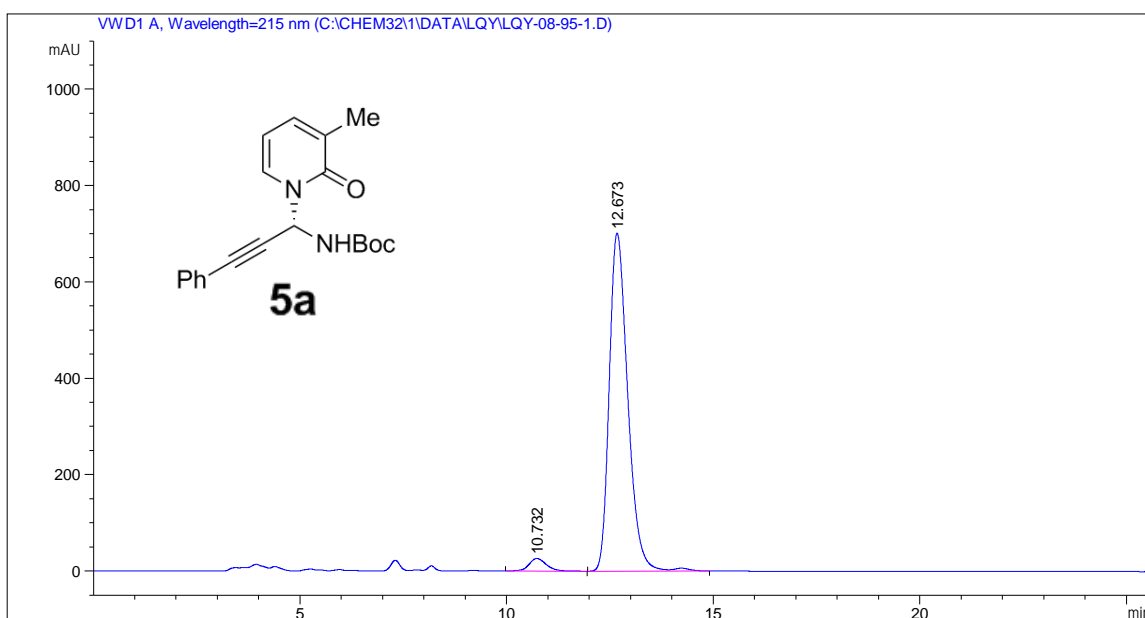

| # | [min]  | [min] | [mAU*s] | [mAU]     | %         |         |
|---|--------|-------|---------|-----------|-----------|---------|
| 1 | 10.732 | BB    | 0.4510  | 780.96393 | 26.33418  | 3.4528  |
| 2 | 12.673 | BV R  | 0.4752  | 2.18376e4 | 701.65155 | 96.5472 |

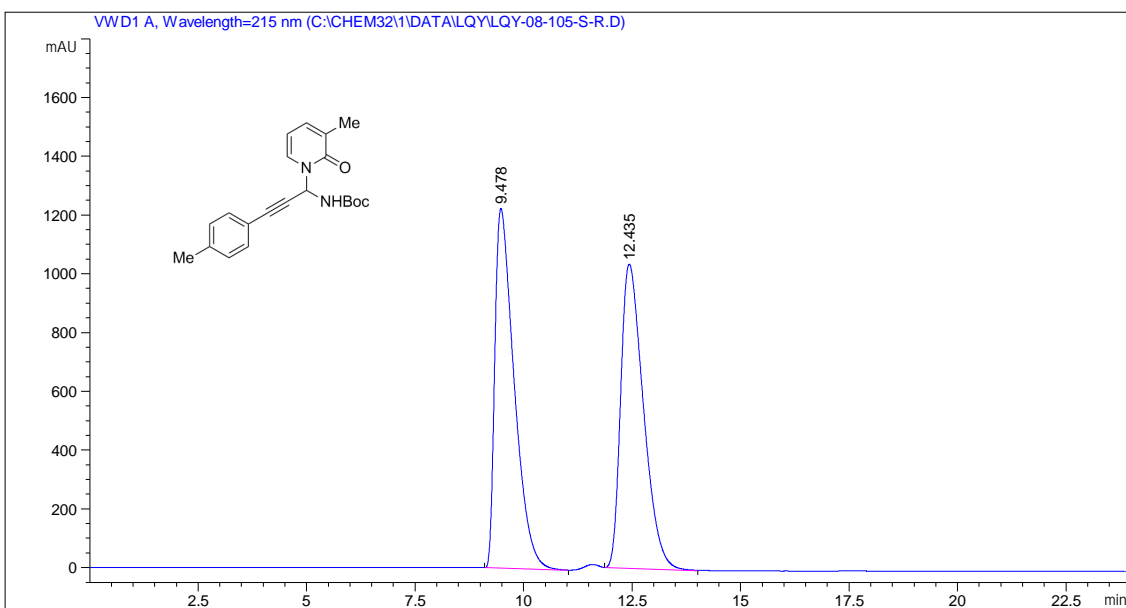

| # | [min]  | [min] | [mAU*s] | [mAU]     | %          |         |
|---|--------|-------|---------|-----------|------------|---------|
| 1 | 9.478  | BB    | 0.4710  | 3.77713e4 | 1223.91370 | 50.0738 |
| 2 | 12.435 | MM    | 0.6061  | 3.76599e4 | 1035.52917 | 49.9262 |

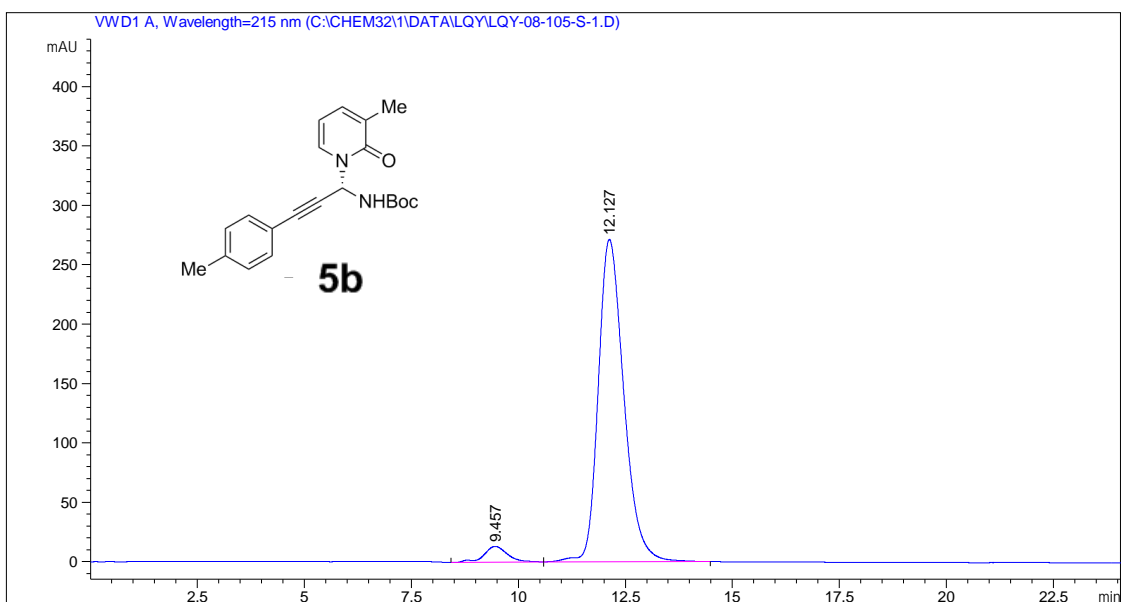

| # | [min]  | [min] | [mAU*s] | [mAU]     | %         |         |
|---|--------|-------|---------|-----------|-----------|---------|
| 1 | 9.457  | VB R  | 0.5679  | 505.45255 | 13.31378  | 4.2992  |
| 2 | 12.127 | BB    | 0.6398  | 1.12516e4 | 271.30576 | 95.7008 |

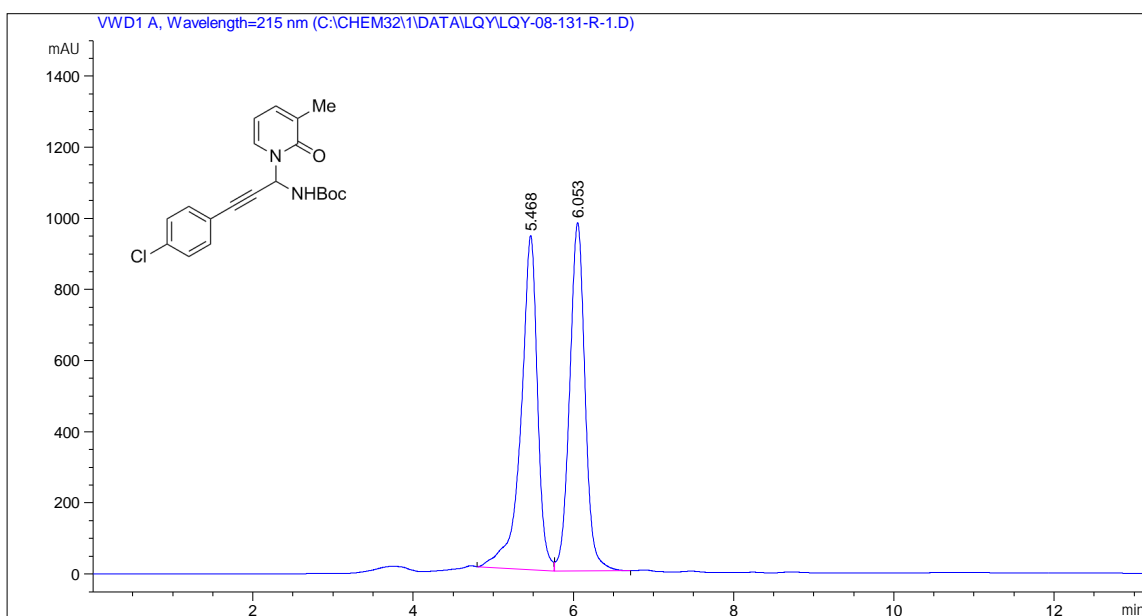

| # | [min] | [min] | [mAU*s] | [mAU]     | %         |         |
|---|-------|-------|---------|-----------|-----------|---------|
| 1 | 5.468 | MM    | 0.2397  | 1.35316e4 | 940.80920 | 50.8477 |
| 2 | 6.053 | VB    | 0.2038  | 1.30805e4 | 979.35138 | 49.1523 |

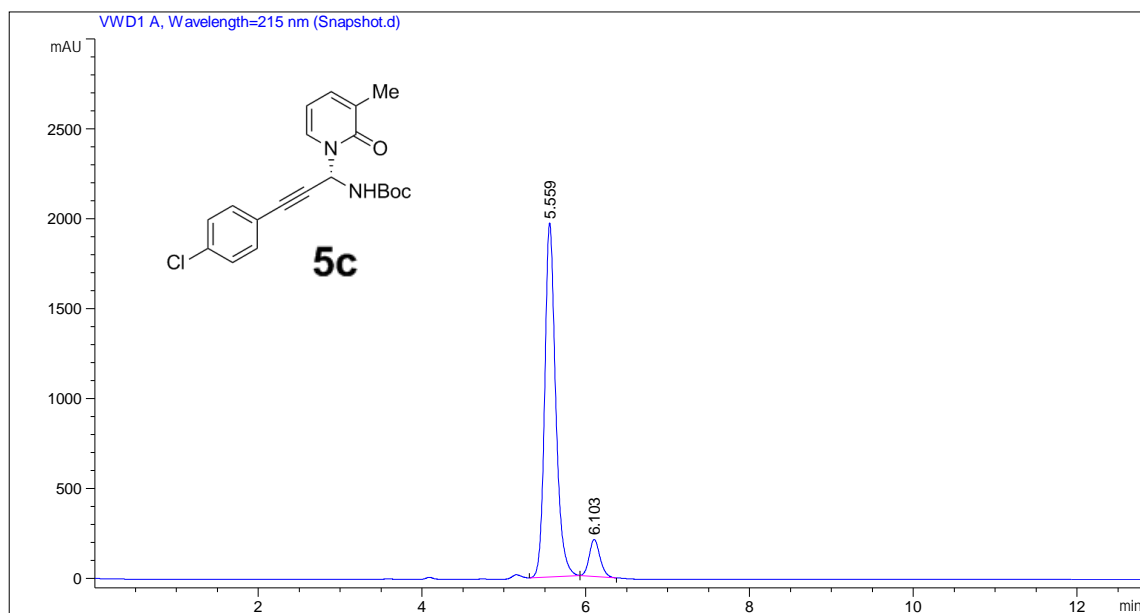

| # | [min] | [min] | [mAU*s] | [mAU]      | %          |         |
|---|-------|-------|---------|------------|------------|---------|
| 1 | 5.559 | MM    | 0.1549  | 1.82867e4  | 1967.73901 | 90.6805 |
| 2 | 6.103 | MM    | 0.1521  | 1879.38477 | 205.95634  | 9.3195  |

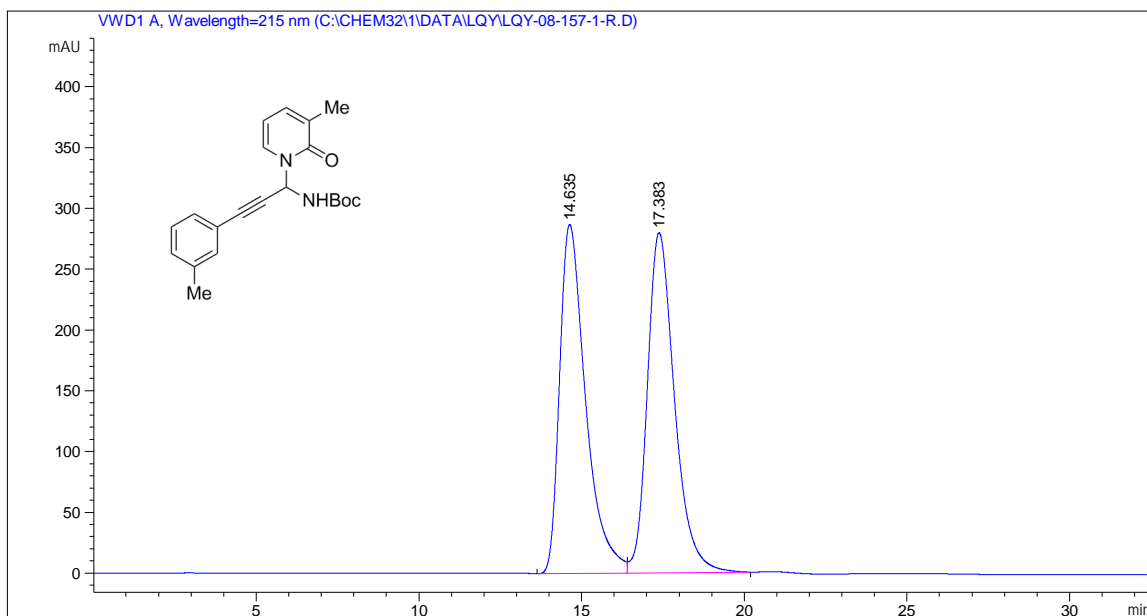

| # | [min]  | [min] | [mAU*s] | [mAU]     | %         |         |
|---|--------|-------|---------|-----------|-----------|---------|
| 1 | 14.635 | BV    | 0.8388  | 1.59665e4 | 287.09940 | 49.5697 |
| 2 | 17.383 | VB    | 0.8883  | 1.62437e4 | 279.80981 | 50.4303 |

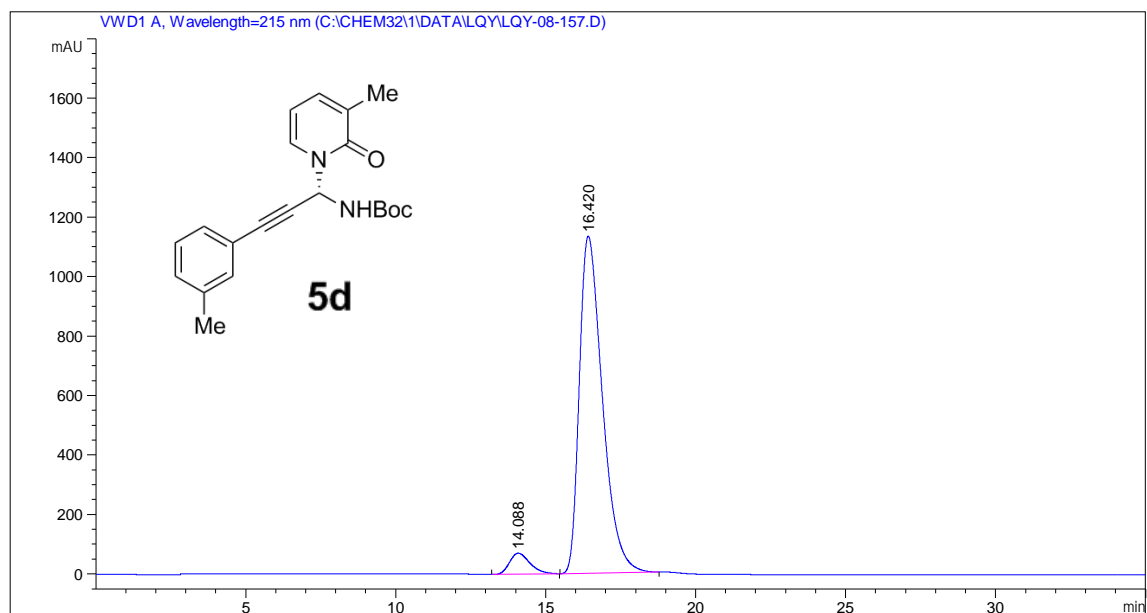

| # | [min]  | [min] | [mAU*s] | [mAU]      | %          |         |
|---|--------|-------|---------|------------|------------|---------|
| 1 | 14.088 | BB    | 0.7265  | 3357.64209 | 70.77703   | 5.2640  |
| 2 | 16.420 | BB    | 0.8240  | 6.04279e4  | 1133.43201 | 94.7360 |

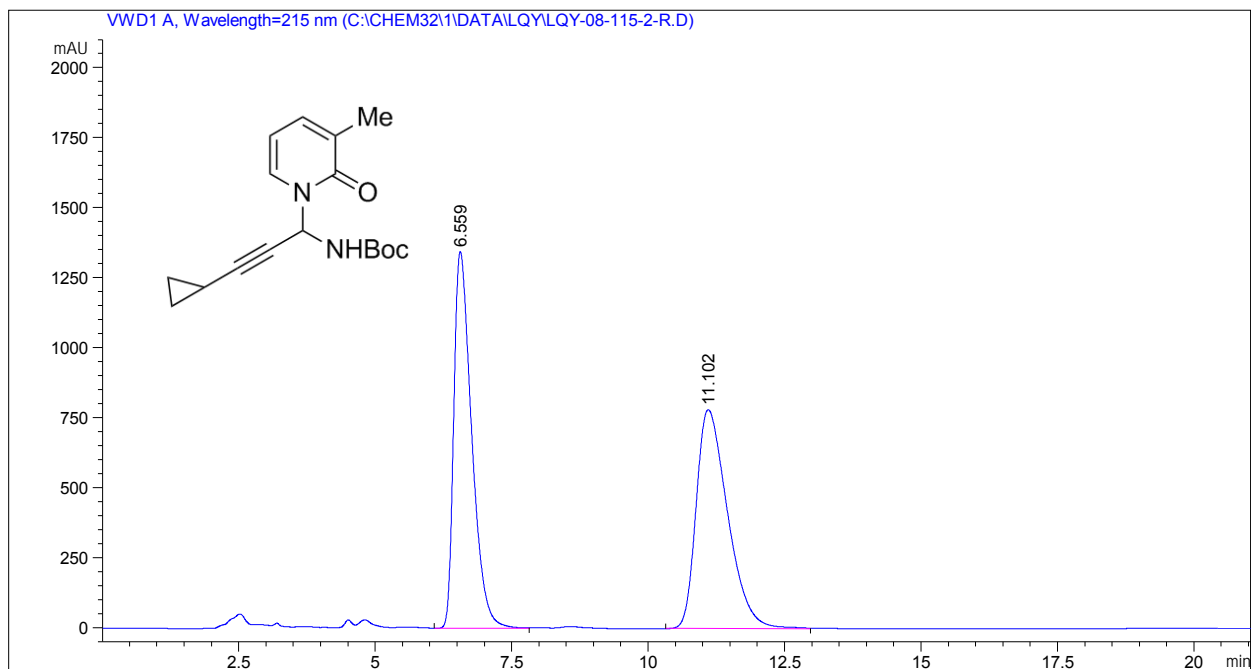

DYU\_FYhH aY HndY K] Xh\ 5fYU <Y] [\h 5fYU

| # | [min]     | [min]  | [mAU*s]   | [mAU]      | %       |
|---|-----------|--------|-----------|------------|---------|
| 1 | 6.559 MM  | 0.3800 | 3.06810e4 | 1345.70300 | 49.4692 |
| 2 | 11.102 MM | 0.6680 | 3.13394e4 | 781.96362  | 50.5308 |

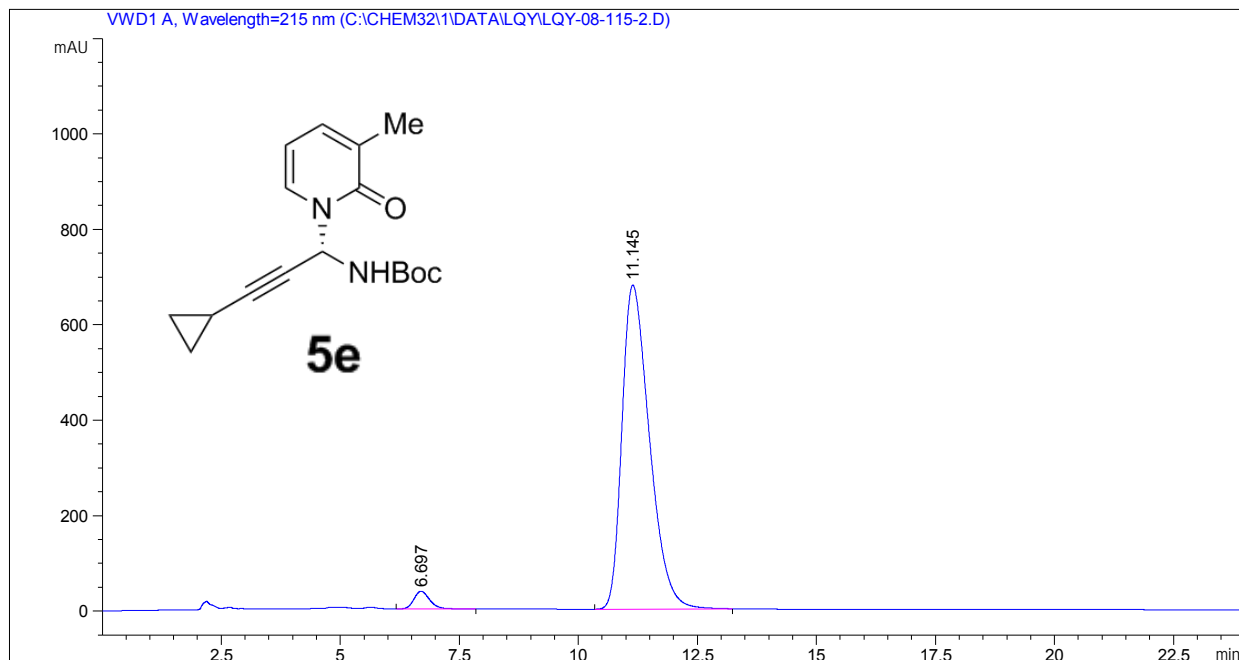

DYU\_FYhH aY HndY K] Xh\ 5fYU <Y] [\h 5fYU

| # | [min]     | [min]  | [mAU*s]   | [mAU]     | %       |
|---|-----------|--------|-----------|-----------|---------|
| 1 | 6.697 BB  | 0.3521 | 845.15936 | 36.91849  | 2.9985  |
| 2 | 11.145 MM | 0.6703 | 2.73409e4 | 679.79895 | 97.0015 |

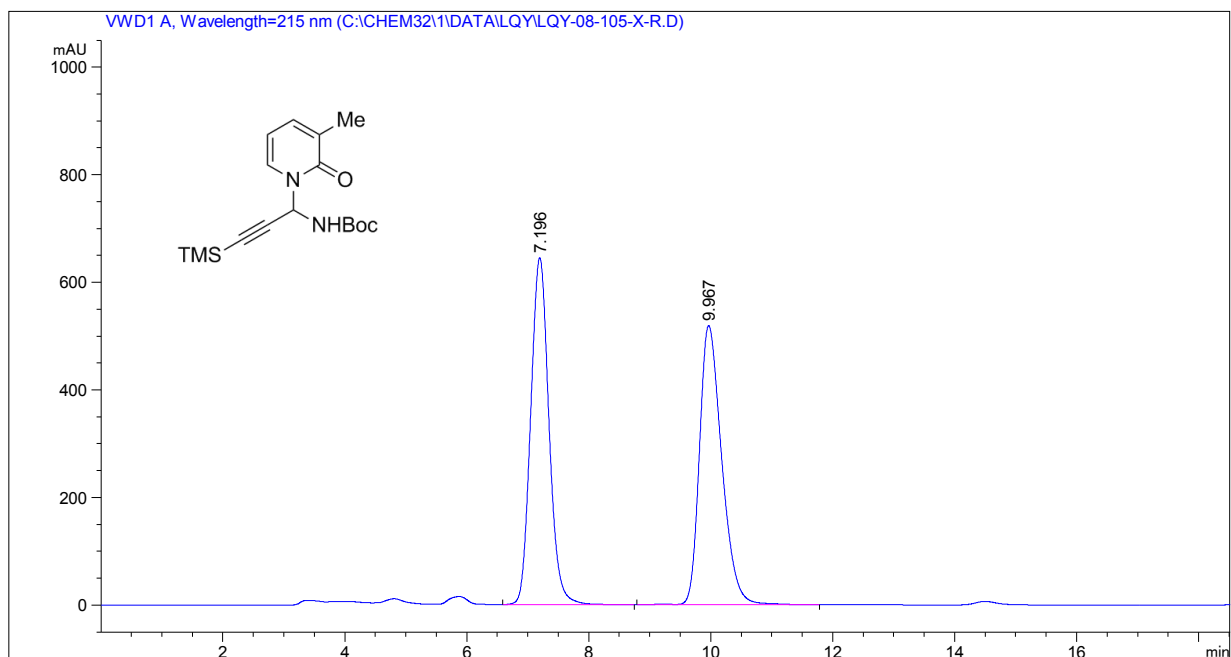

| Peak # | RetTime [min] | Type | Width [min] | Area [mAU*s] | Height [mAU] | Area %  |
|--------|---------------|------|-------------|--------------|--------------|---------|
| 1      | 7.196         | BB   | 0.3241      | 1.33883e4    | 645.15979    | 50.4298 |
| 2      | 9.967         | VB R | 0.3889      | 1.31600e4    | 518.94922    | 49.5702 |

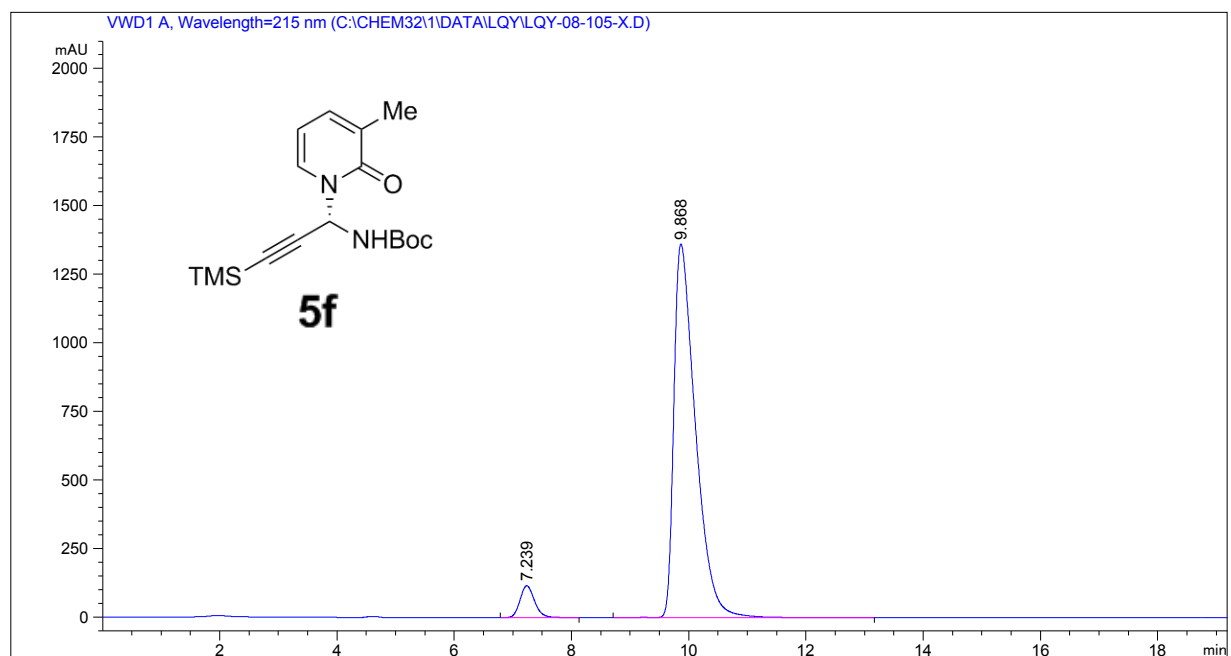

| Peak # | RetTime [min] | Type | Width [min] | Area [mAU*s] | Height [mAU] | Area %  |
|--------|---------------|------|-------------|--------------|--------------|---------|
| 1      | 7.239         | BB   | 0.2658      | 2017.70862   | 116.66652    | 5.4800  |
| 2      | 9.868         | VB R | 0.3848      | 3.48019e4    | 1363.39001   | 94.5200 |

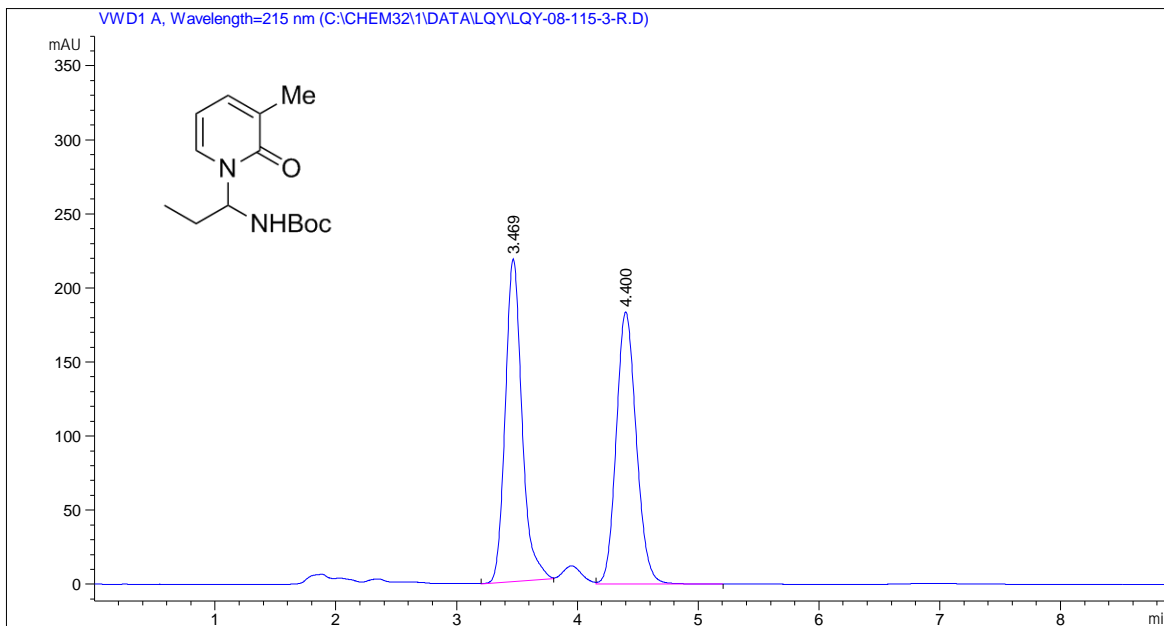

| # | [min] | [min] | [mAU*s] | [mAU]      | %         |         |
|---|-------|-------|---------|------------|-----------|---------|
| 1 | 3.469 | MM    | 0.1609  | 2105.23413 | 218.04080 | 49.8684 |
| 2 | 4.400 | VB    | 0.1785  | 2116.34814 | 183.53882 | 50.1316 |

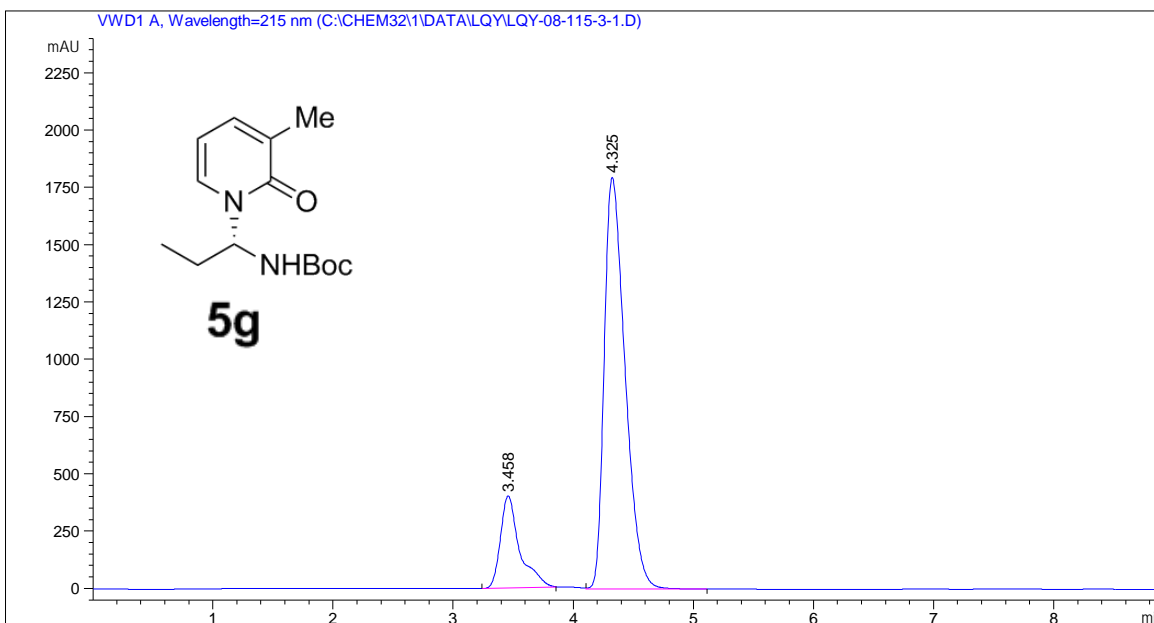

| # | [min] | [min] | [mAU*s] | [mAU]      | %          |         |
|---|-------|-------|---------|------------|------------|---------|
| 1 | 3.458 | MM    | 0.1845  | 4438.65137 | 400.91919  | 17.0290 |
| 2 | 4.325 | VB    | 0.1856  | 2.16266e4  | 1794.70776 | 82.9710 |



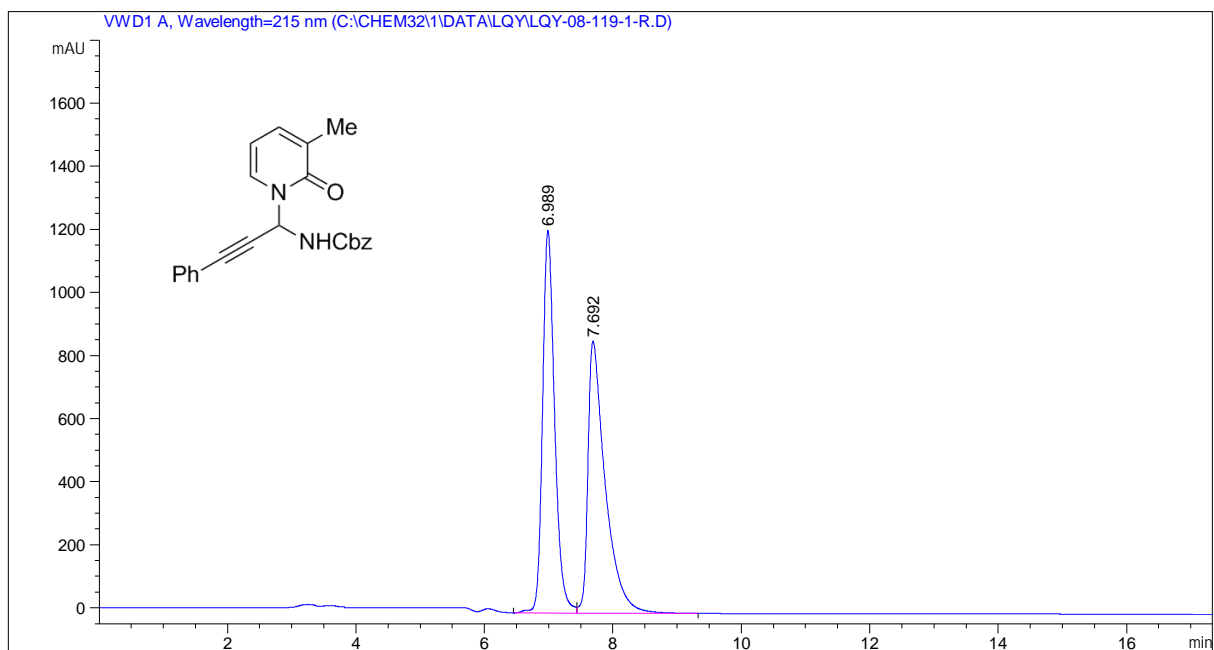

| # | [min] | [min] | [mAU*s] | [mAU]     | %          |         |
|---|-------|-------|---------|-----------|------------|---------|
| 1 | 6.989 | VR    | 0.1989  | 1.58923e4 | 1212.43835 | 49.5567 |
| 2 | 7.692 | VB    | 0.2708  | 1.61766e4 | 862.37329  | 50.4433 |

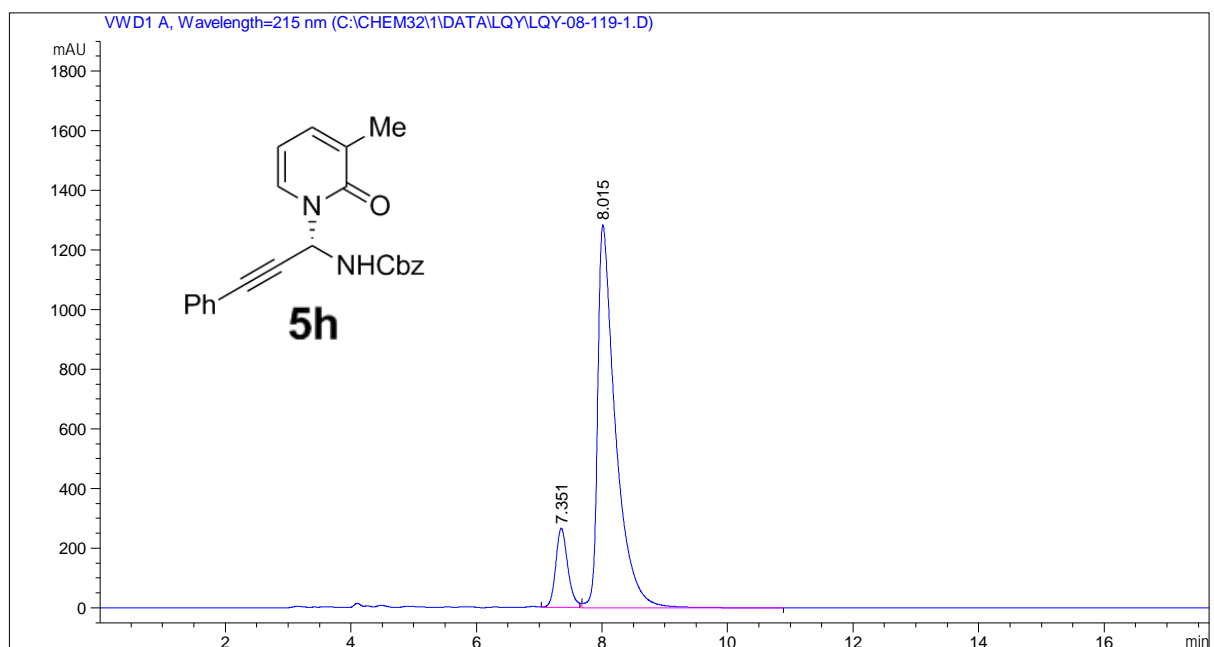

| # | [min] | [min] | [mAU*s] | [mAU]      | %          |         |
|---|-------|-------|---------|------------|------------|---------|
| 1 | 7.351 | MM    | 0.2226  | 3554.34644 | 266.09863  | 12.3308 |
| 2 | 8.015 | VB    | 0.2827  | 2.52707e4  | 1283.75549 | 87.6692 |

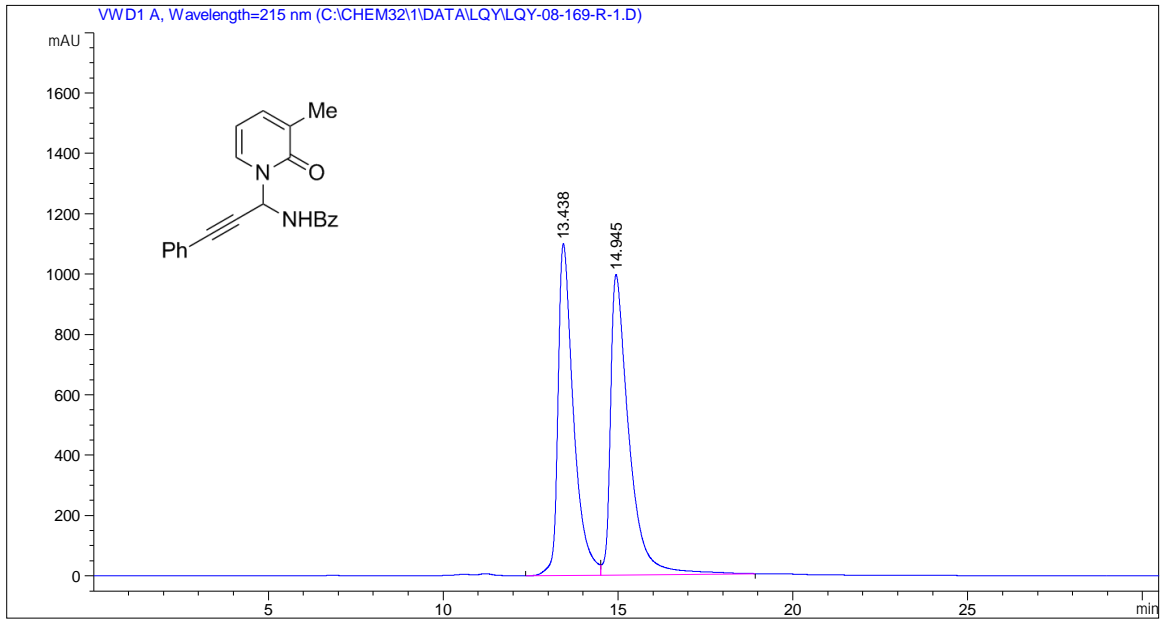

| # | [min]  | [min] | [mAU*s] | [mAU]     | %          |         |
|---|--------|-------|---------|-----------|------------|---------|
| 1 | 13.438 | MM    | 0.5133  | 3.38782e4 | 1099.95325 | 48.0874 |
| 2 | 14.945 | MM    | 0.6125  | 3.65731e4 | 995.24701  | 51.9126 |

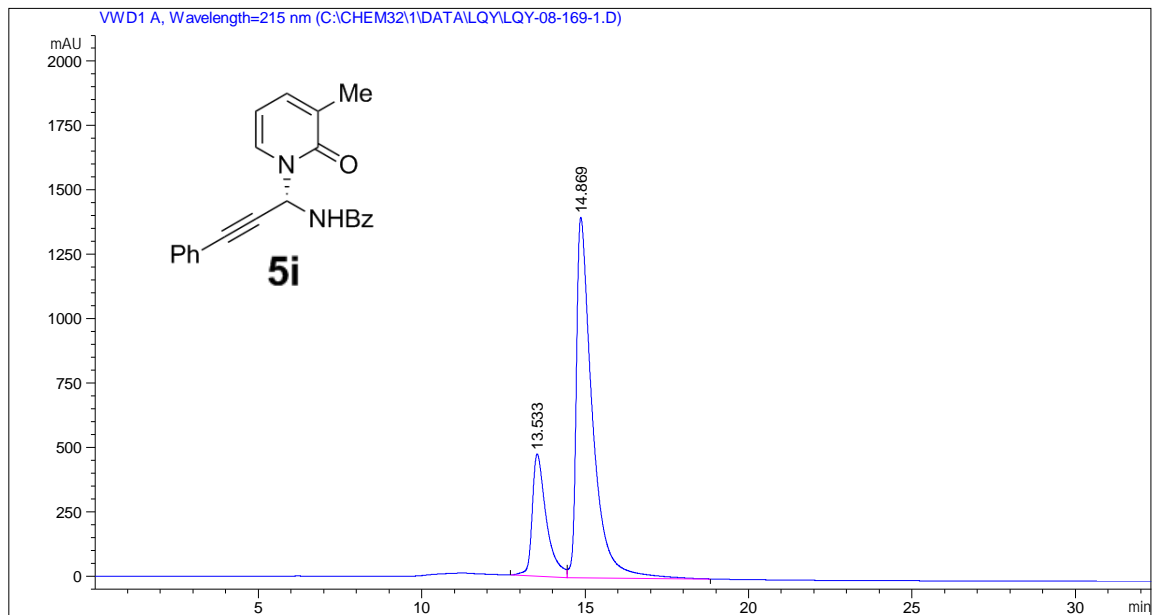

| # | [min]  | [min] | [mAU*s] | [mAU]     | %          |         |
|---|--------|-------|---------|-----------|------------|---------|
| 1 | 13.533 | MM    | 0.5022  | 1.43179e4 | 475.13943  | 23.0375 |
| 2 | 14.869 | MM    | 0.5692  | 4.78327e4 | 1400.56360 | 76.9625 |

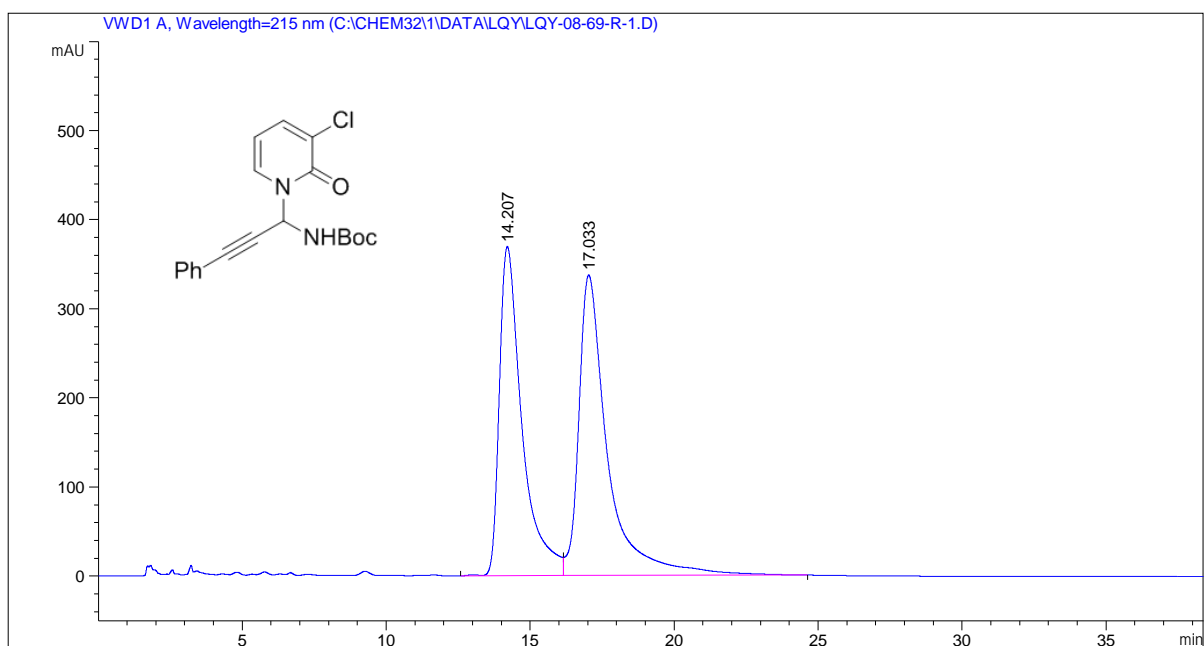

| Peak # | RetTime [min] | Type | Width [min] | Area [mAU*s] | Height [mAU] | Area %  |
|--------|---------------|------|-------------|--------------|--------------|---------|
| 1      | 14.207        | VV R | 0.7978      | 2.02276e4    | 369.42578    | 46.3217 |
| 2      | 17.033        | VB   | 0.9899      | 2.34400e4    | 337.23438    | 53.6783 |

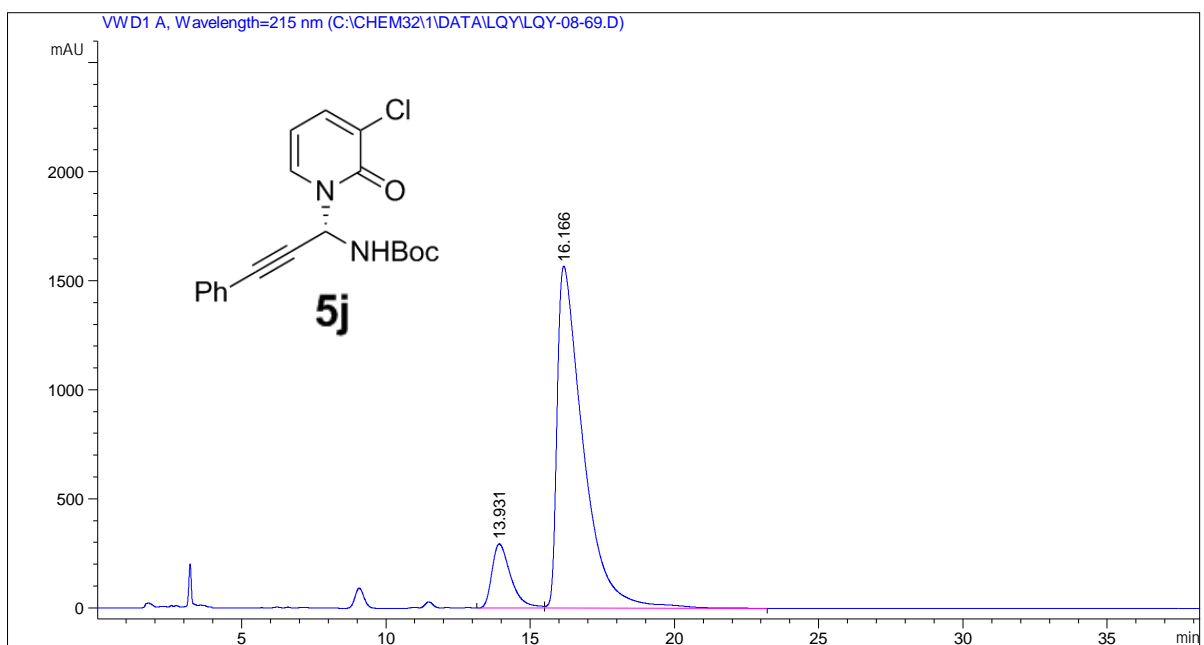

| Peak # | RetTime [min] | Type | Width [min] | Area [mAU*s] | Height [mAU] | Area %  |
|--------|---------------|------|-------------|--------------|--------------|---------|
| 1      | 13.931        | BV   | 0.6961      | 1.33869e4    | 294.64618    | 12.0267 |
| 2      | 16.166        | VB   | 0.9071      | 9.79231e4    | 1569.15857   | 87.9733 |

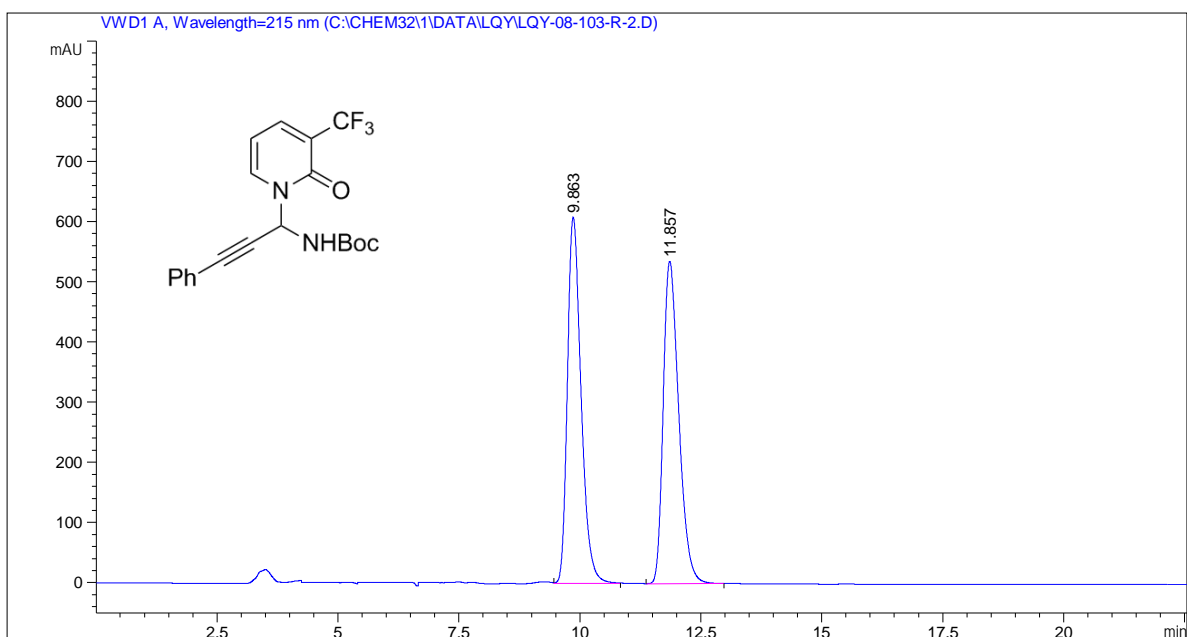

| # | [min]     | [min]  | [mAU*s]   | [mAU]     | %       |
|---|-----------|--------|-----------|-----------|---------|
| 1 | 9.863 MM  | 0.3271 | 1.19437e4 | 608.49042 | 49.9623 |
| 2 | 11.857 BB | 0.3446 | 1.19617e4 | 535.50598 | 50.0377 |

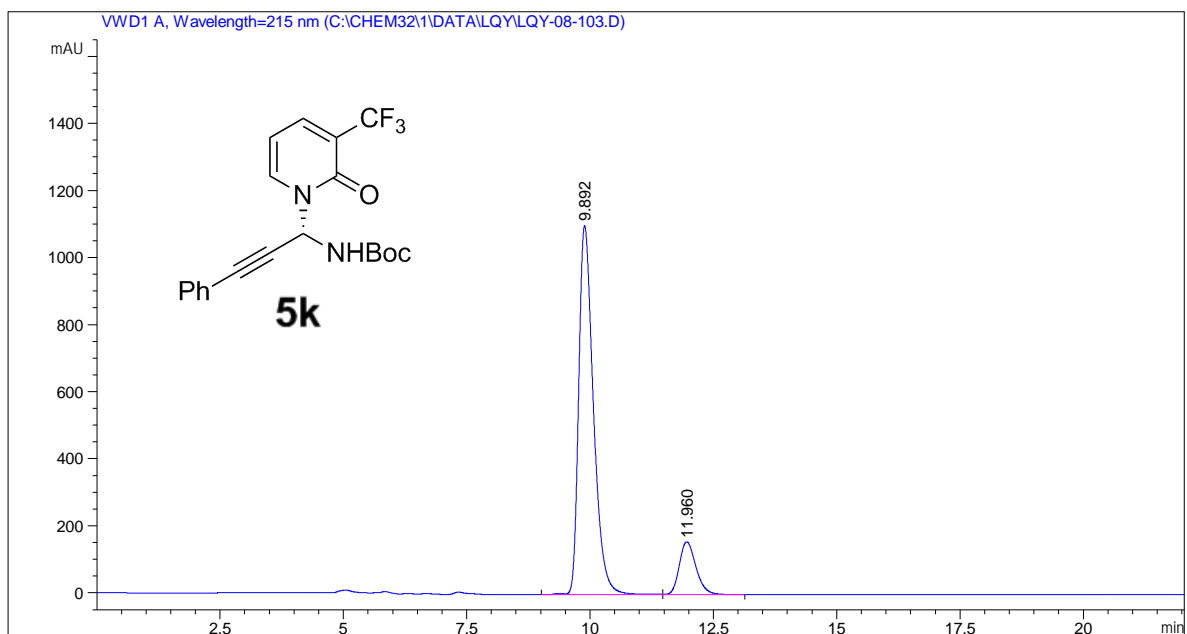

| # | [min]      | [min]  | [mAU*s]    | [mAU]      | %       |
|---|------------|--------|------------|------------|---------|
| 1 | 9.892 VV R | 0.3170 | 2.27945e4  | 1100.88086 | 86.0349 |
| 2 | 11.960 VB  | 0.3606 | 3699.98804 | 157.78110  | 13.9651 |

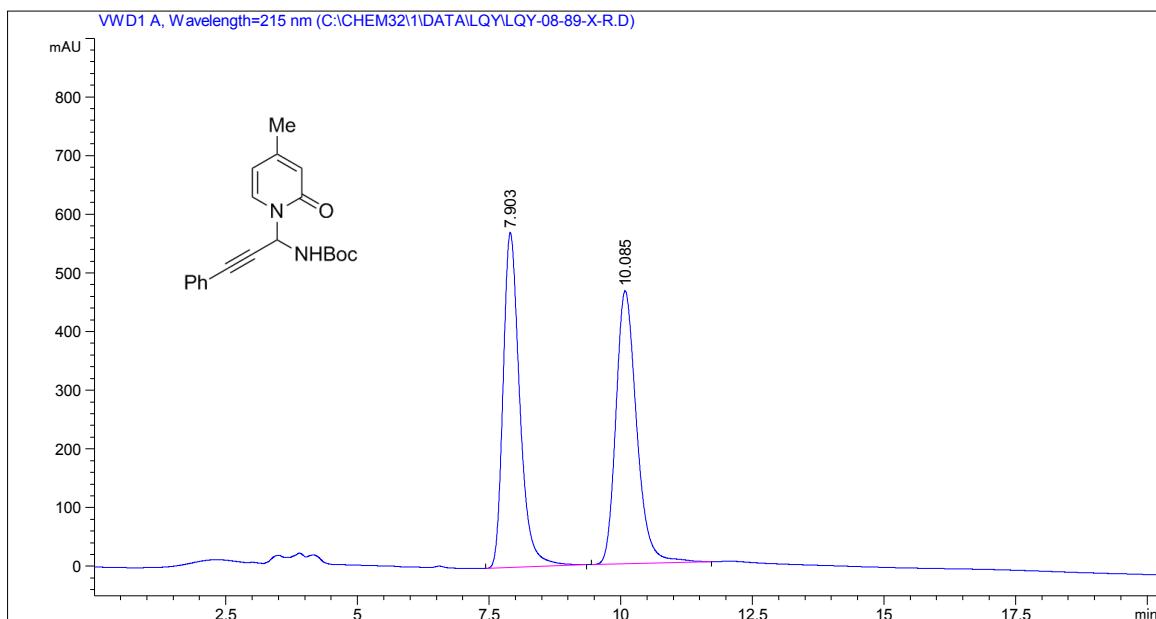

| Peak # | RetTime [min] | Type | Width [min] | Area [mAU*s] | Height [mAU] | Area %  |
|--------|---------------|------|-------------|--------------|--------------|---------|
| 1      | 7.903         | BB   | 0.3352      | 1.25375e4    | 570.89581    | 49.6493 |
| 2      | 10.085        | BB   | 0.4199      | 1.27146e4    | 465.19318    | 50.3507 |

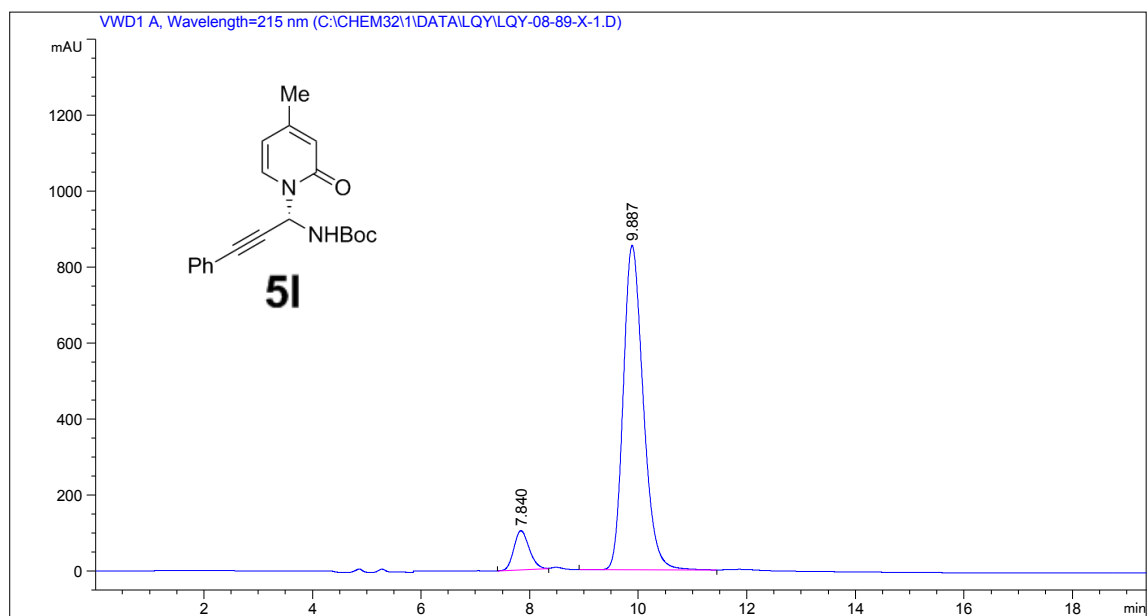

| Peak # | RetTime [min] | Type | Width [min] | Area [mAU*s] | Height [mAU] | Area %  |
|--------|---------------|------|-------------|--------------|--------------|---------|
| 1      | 7.840         | MM   | 0.3291      | 2046.23303   | 103.63663    | 8.5911  |
| 2      | 9.887         | VB R | 0.3935      | 2.17718e4    | 853.83411    | 91.4089 |

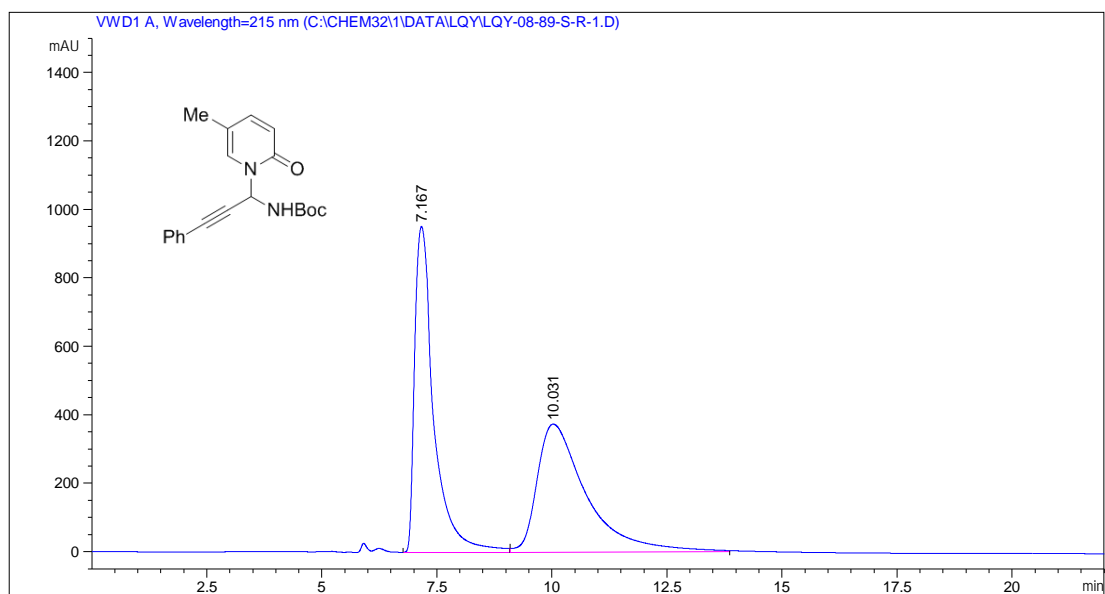

| # | [min]  | [min] | [mAU*s] | [mAU]     | %         |         |
|---|--------|-------|---------|-----------|-----------|---------|
| 1 | 7.167  | BV    | 0.4341  | 2.75061e4 | 952.08728 | 49.7177 |
| 2 | 10.031 | MM    | 1.2391  | 2.78185e4 | 374.17365 | 50.2823 |

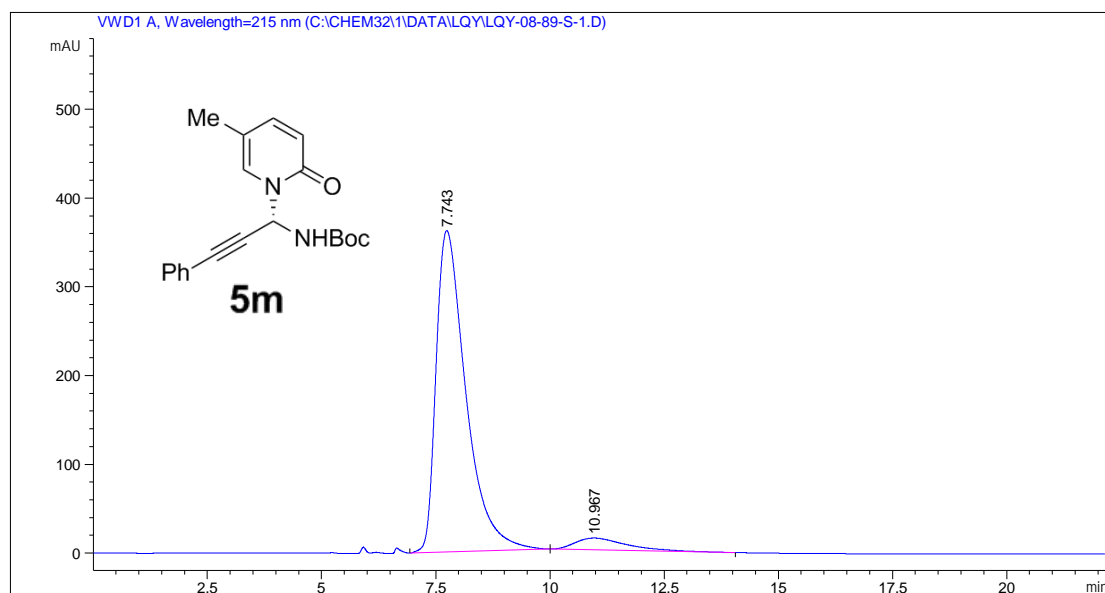

| # | [min]  | [min] | [mAU*s] | [mAU]      | %         |         |
|---|--------|-------|---------|------------|-----------|---------|
| 1 | 7.743  | BB    | 0.6900  | 1.64497e4  | 362.12421 | 93.9783 |
| 2 | 10.967 | BB    | 1.1497  | 1054.02502 | 13.34138  | 6.0217  |

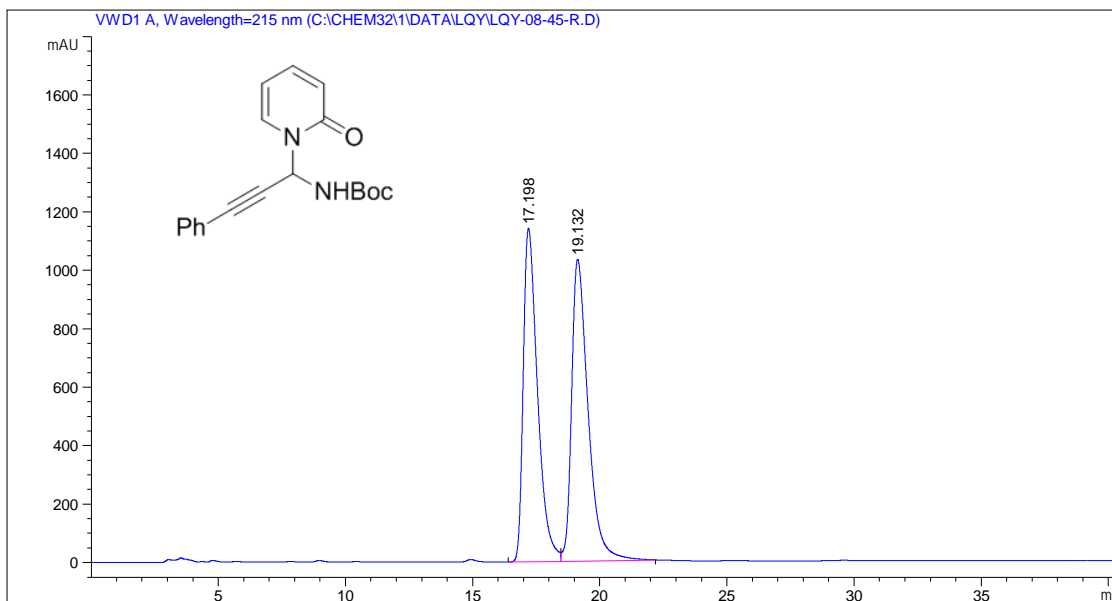

| Peak # | RetTime [min] | Type | Width [min] | Area [mAU*s] | Height [mAU] | Area %  |
|--------|---------------|------|-------------|--------------|--------------|---------|
| 1      | 17.198        | BV   | 0.5926      | 4.46036e4    | 1142.12146   | 48.8387 |
| 2      | 19.132        | MM   | 0.7535      | 4.67247e4    | 1033.51782   | 51.1613 |

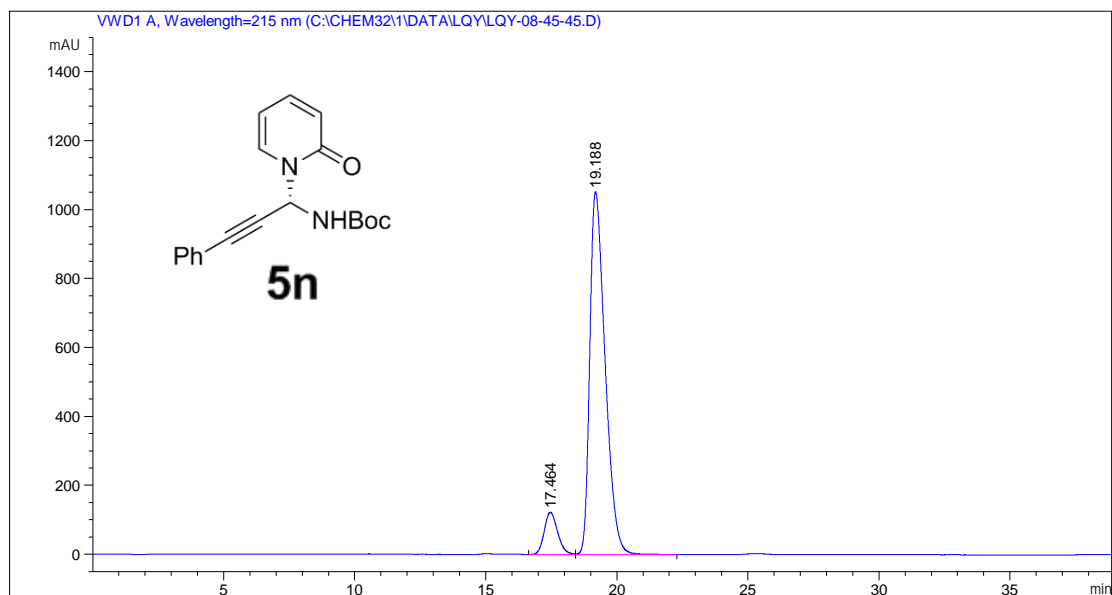

| Peak # | RetTime [min] | Type | Width [min] | Area [mAU*s] | Height [mAU] | Area %  |
|--------|---------------|------|-------------|--------------|--------------|---------|
| 1      | 17.464        | BV   | 0.5475      | 4334.63232   | 122.59177    | 9.2154  |
| 2      | 19.188        | VB   | 0.6185      | 4.27024e4    | 1052.22437   | 90.7846 |

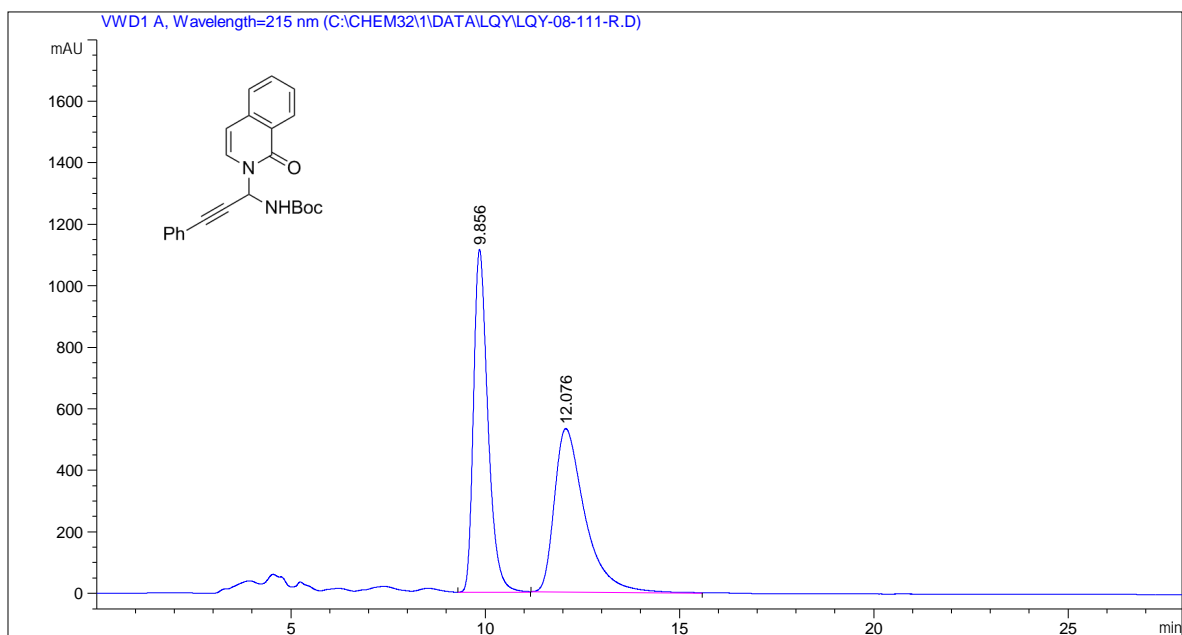

| Peak # | RetTime [min] | Type | Width [min] | Area [mAU*s] | Height [mAU] | Area %  |
|--------|---------------|------|-------------|--------------|--------------|---------|
| 1      | 9.856         | BV   | 0.3930      | 2.87715e4    | 1115.11047   | 49.8483 |
| 2      | 12.076        | MM   | 0.9080      | 2.89466e4    | 531.31116    | 50.1517 |

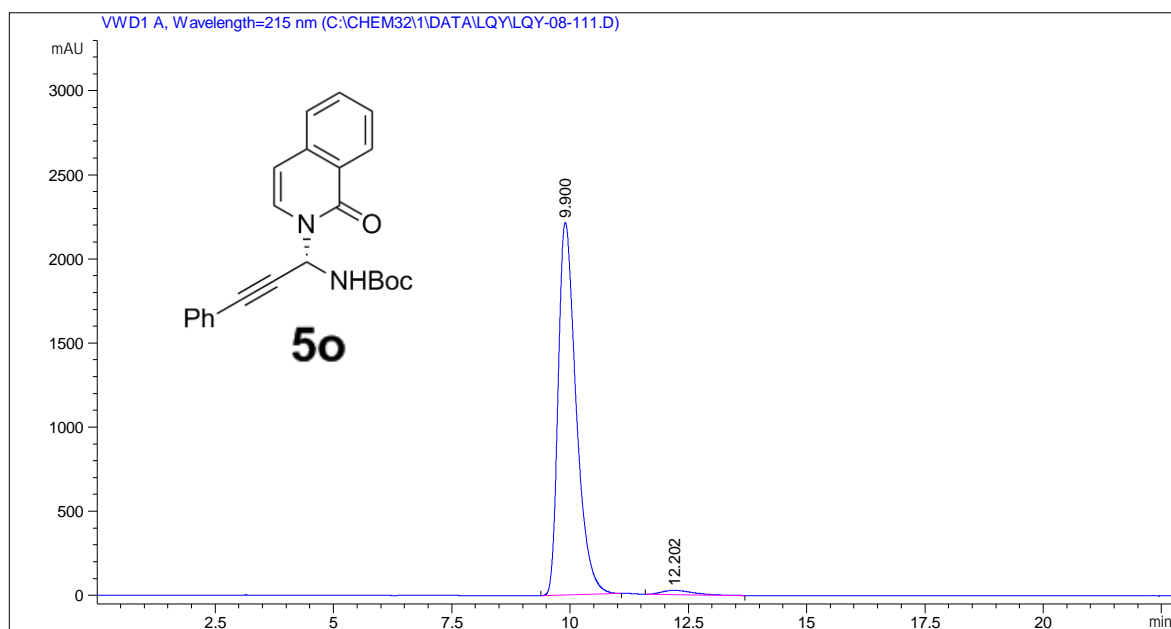

| Peak # | RetTime [min] | Type | Width [min] | Area [mAU*s] | Height [mAU] | Area %  |
|--------|---------------|------|-------------|--------------|--------------|---------|
| 1      | 9.900         | BB   | 0.4011      | 5.83087e4    | 2214.91919   | 98.0437 |
| 2      | 12.202        | BB   | 0.7001      | 1163.45093   | 25.75040     | 1.9563  |
